# Supplementary material for: T-DNA integration in plants requires MRE11- or TDP2-mediated removal of the 5’ bound Agrobacterium protein VirD2
Source: Research Square preprint supplement (doi:10.21203/rs.3.rs-1144888/v1), 2021-12-09
Supplement: Supplementary file 2 [file 447a8a9f6a24e05f58a55f0d.xlsx]

## Sheet: Sheet1
Sample	Genotype	NrAnchorsIncludingPartial	tailSize	getFractionHighestContributorToMinimumJunction	isOK	IGVPos	isForward	Chr	RealPosition	LB.RB	DNA	FillerLength	Filler	HomologyLength	Homology	DistanceToLBRB	Ecotype	Run	Plasmid	duplicated_position
col_1_col_4_LB_1_104596_pUBC-YFP-mod0	wt	8	262	1	TRUE	1:266348	forward	1	266348	LB	LZ156_1	0		1	C	-27	Col-0	104596	pUBC-YFP-mod0	FALSE
col_1_col_4_LB_1_104596_pUBC-YFP-mod0	wt	6	275	1	TRUE	1:3406547	forward	1	3406547	LB	LZ156_1	0		2	CA	-26	Col-0	104596	pUBC-YFP-mod0	FALSE
col_1_col_4_LB_1_104596_pUBC-YFP-mod0	wt	9	239	0.888889	TRUE	1:3922328	forward	1	3922328	LB	LZ156_1	0		2	TC	-35	Col-0	104596	pUBC-YFP-mod0	FALSE
col_1_col_4_LB_1_104596_pUBC-YFP-mod0	wt	21	248	0.904762	TRUE	1:5144452	forward	1	5144452	LB	LZ156_1	23	GTGTTATTAAGAGTATTGATACA	0		-24	Col-0	104596	pUBC-YFP-mod0	FALSE
col_1_col_4_LB_1_104596_pUBC-YFP-mod0	wt	3	287	1	TRUE	1:5408952	forward	1	5408952	LB	LZ156_1	0		2	AT	-44	Col-0	104596	pUBC-YFP-mod0	FALSE
col_1_col_4_LB_1_104596_pUBC-YFP-mod0	wt	3	354	1	TRUE	1:7119704	forward	1	7119704	LB	LZ156_1	6	CTGAAT	0		-63	Col-0	104596	pUBC-YFP-mod0	FALSE
col_1_col_4_LB_1_104596_pUBC-YFP-mod0	wt	3	327	1	TRUE	1:8062044	reverse	1	8062044	LB	LZ156_1	4	ACGT	0		-32	Col-0	104596	pUBC-YFP-mod0	FALSE
col_1_col_4_LB_1_104596_pUBC-YFP-mod0	wt	7	236	0.857143	TRUE	1:9832116	forward	1	9832116	LB	LZ156_1	0		2	GC	-30	Col-0	104596	pUBC-YFP-mod0	FALSE
col_1_col_4_LB_1_104596_pUBC-YFP-mod0	wt	8	355	1	TRUE	1:9832187	reverse	1	9832187	LB	LZ156_1	0		4	CATT	-66	Col-0	104596	pUBC-YFP-mod0	FALSE
col_1_col_4_LB_1_104596_pUBC-YFP-mod0	wt	22	333	0.954545	TRUE	1:19474761	forward	1	19474761	LB	LZ156_1	0		4	GTTA	-45	Col-0	104596	pUBC-YFP-mod0	FALSE
col_1_col_4_LB_1_104596_pUBC-YFP-mod0	wt	3	267	1	TRUE	1:22773130	reverse	1	22773130	LB	LZ156_1	0		0		-24	Col-0	104596	pUBC-YFP-mod0	FALSE
col_1_col_4_LB_1_104596_pUBC-YFP-mod0	wt	12	738	0.916667	TRUE	1:23267323	forward	1	23267323	LB	LZ156_1	0		0		-24	Col-0	104596	pUBC-YFP-mod0	FALSE
col_1_col_4_LB_1_104596_pUBC-YFP-mod0	wt	3	208	1	TRUE	1:26364486	forward	1	26364486	LB	LZ156_1	0		2	AT	-44	Col-0	104596	pUBC-YFP-mod0	FALSE
col_1_col_4_LB_1_104596_pUBC-YFP-mod0	wt	3	264	1	TRUE	1:26541098	reverse	1	26541098	LB	LZ156_1	0		5	TAAAA	-62	Col-0	104596	pUBC-YFP-mod0	FALSE
col_1_col_4_LB_1_104596_pUBC-YFP-mod0	wt	4	140	1	TRUE	1:27233118	reverse	1	27233118	LB	LZ156_1	0		2	TC	-35	Col-0	104596	pUBC-YFP-mod0	FALSE
col_1_col_4_LB_1_104596_pUBC-YFP-mod0	wt	6	340	1	TRUE	1:28593307	reverse	1	28593307	LB	LZ156_1	0		3	ATT	-43	Col-0	104596	pUBC-YFP-mod0	FALSE
col_1_col_4_LB_1_104596_pUBC-YFP-mod0	wt	3	153	1	TRUE	1:29243489	reverse	1	29243489	LB	LZ156_1	5	AAAAA	0		-37	Col-0	104596	pUBC-YFP-mod0	FALSE
col_1_col_4_LB_1_104596_pUBC-YFP-mod0	wt	10	279	0.8	TRUE	1:29789305	forward	1	29789305	LB	LZ156_1	0		5	AAAAA	-61	Col-0	104596	pUBC-YFP-mod0	FALSE
col_1_col_4_LB_1_104596_pUBC-YFP-mod0	wt	3	214	1	TRUE	1:30234968	forward	1	30234968	LB	LZ156_1	0		8	CTTTGTTT	-18	Col-0	104596	pUBC-YFP-mod0	FALSE
col_1_col_4_LB_1_104596_pUBC-YFP-mod0	wt	5	199	1	TRUE	1:3875837	reverse	1	3875837	LB	LZ156_1	3	TTT	0		-15	Col-0	104596	pUBC-YFP-mod0	FALSE
col_1_col_4_LB_1_104596_pUBC-YFP-mod0	wt	16	457	0.75	TRUE	1:23547881	reverse	1	23547881	LB	LZ156_1	0		4	ACCA	-12	Col-0	104596	pUBC-YFP-mod0	FALSE
col_1_col_4_LB_1_104596_pUBC-YFP-mod0	wt	3	142	1	TRUE	1:10111632	reverse	1	10111632	LB	LZ156_1	0		3	CTG	0	Col-0	104596	pUBC-YFP-mod0	FALSE
col_1_col_4_LB_1_104596_pUBC-YFP-mod0	wt	6	278	0.833333	TRUE	1:7700055	reverse	1	7700055	LB	LZ156_1	0		1	T	-20	Col-0	104596	pUBC-YFP-mod0	FALSE
col_1_col_4_LB_1_104596_pUBC-YFP-mod0	wt	16	391	1	TRUE	1:9739733	reverse	1	9739733	LB	LZ156_1	0		3	TTA	-17	Col-0	104596	pUBC-YFP-mod0	FALSE
col_1_col_4_LB_1_104596_pUBC-YFP-mod0	wt	3	489	1	TRUE	1:3367788	forward	1	3367788	LB	LZ156_1	0		2	TG	0	Col-0	104596	pUBC-YFP-mod0	FALSE
col_1_col_4_LB_1_104596_pUBC-YFP-mod0	wt	7	266	1	TRUE	1:3367838	reverse	1	3367838	LB	LZ156_1	19	GATCACAGCTAAGCAGATC	0		-26	Col-0	104596	pUBC-YFP-mod0	FALSE
col_1_col_4_LB_1_104596_pUBC-YFP-mod0	wt	5	234	1	TRUE	1:7500449	forward	1	7500449	LB	LZ156_1	30	AAAGTCCCCCATTGGCGTTAATTCGTCAAG	0		-22	Col-0	104596	pUBC-YFP-mod0	FALSE
col_1_col_4_LB_1_104596_pUBC-YFP-mod0	wt	3	151	1	TRUE	1:24076483	reverse	1	24076483	LB	LZ156_1	0		2	CA	-10	Col-0	104596	pUBC-YFP-mod0	FALSE
col_1_col_4_LB_1_104596_pUBC-YFP-mod0	wt	4	330	0.75	TRUE	1:7121820	forward	1	7121820	LB	LZ156_1	1	C	0		-1	Col-0	104596	pUBC-YFP-mod0	FALSE
col_1_col_4_LB_1_104596_pUBC-YFP-mod0	wt	3	207	1	TRUE	1:30173524	forward	1	30173524	LB	LZ156_1	12	ACACATTGCGGA	0		-7	Col-0	104596	pUBC-YFP-mod0	FALSE
col_1_col_4_LB_1_104596_pUBC-YFP-mod0	wt	6	123	0.833333	TRUE	1:16780478	forward	1	16780478	LB	LZ156_1	7	GTCATTC	0		0	Col-0	104596	pUBC-YFP-mod0	FALSE
col_1_col_4_LB_1_104596_pUBC-YFP-mod0	wt	3	226	1	TRUE	1:673146	reverse	1	673146	LB	LZ156_1	0		3	CCA	-12	Col-0	104596	pUBC-YFP-mod0	FALSE
col_1_col_4_LB_1_104596_pUBC-YFP-mod0	wt	4	338	1	TRUE	1:4909647	reverse	1	4909647	LB	LZ156_1	0		2	GT	-20	Col-0	104596	pUBC-YFP-mod0	FALSE
col_1_col_4_LB_1_104596_pUBC-YFP-mod0	wt	12	397	0.916667	TRUE	1:8631342	forward	1	8631342	LB	LZ156_1	0		0		-17	Col-0	104596	pUBC-YFP-mod0	FALSE
col_1_col_4_LB_1_104596_pUBC-YFP-mod0	wt	4	185	0.75	TRUE	1:8523343	reverse	1	8523343	LB	LZ156_1	2	TT	0		-16	Col-0	104596	pUBC-YFP-mod0	FALSE
col_1_col_4_LB_1_104596_pUBC-YFP-mod0	wt	3	106	1	TRUE	1:7835394	reverse	1	7835394	LB	LZ156_1	0		4	TTGT	-20	Col-0	104596	pUBC-YFP-mod0	FALSE
col_1_col_4_LB_1_104596_pUBC-YFP-mod0	wt	8	282	0.875	TRUE	1:271651	reverse	1	271651	LB	LZ156_1	0		2	AC	-14	Col-0	104596	pUBC-YFP-mod0	FALSE
col_1_col_4_LB_1_104596_pUBC-YFP-mod0	wt	4	388	1	TRUE	1:3241739	forward	1	3241739	LB	LZ156_1	0		6	TTACAC	-14	Col-0	104596	pUBC-YFP-mod0	FALSE
col_1_col_4_LB_1_104596_pUBC-YFP-mod0	wt	10	400	1	TRUE	1:28460581	reverse	1	28460581	LB	LZ156_1	0		0		-15	Col-0	104596	pUBC-YFP-mod0	FALSE
col_1_col_4_LB_1_104596_pUBC-YFP-mod0	wt	3	203	1	TRUE	1:22810341	forward	1	22810341	LB	LZ156_1	0		1	A	-7	Col-0	104596	pUBC-YFP-mod0	FALSE
col_1_col_4_LB_1_104596_pUBC-YFP-mod0	wt	6	414	0.833333	TRUE	1:9394883	forward	1	9394883	LB	LZ156_1	0		0		-6	Col-0	104596	pUBC-YFP-mod0	FALSE
col_1_col_4_LB_1_104596_pUBC-YFP-mod0	wt	3	453	1	TRUE	1:25127153	forward	1	25127153	LB	LZ156_1	14	GCAATGTGGACATA	0		-13	Col-0	104596	pUBC-YFP-mod0	FALSE
col_1_col_4_LB_1_104596_pUBC-YFP-mod0	wt	3	173	1	TRUE	1:1146791	reverse	1	1146791	LB	LZ156_1	14	ATACAAGCTGATAA	0		-20	Col-0	104596	pUBC-YFP-mod0	FALSE
col_1_col_4_LB_1_104596_pUBC-YFP-mod0	wt	3	178	1	TRUE	1:24805688	reverse	1	24805688	LB	LZ156_1	18	TAACACCATCAATCCTGT	0		-12	Col-0	104596	pUBC-YFP-mod0	FALSE
col_1_col_4_LB_1_104596_pUBC-YFP-mod0	wt	3	198	1	TRUE	1:269773	forward	1	269773	LB	LZ156_1	0		3	CTG	0	Col-0	104596	pUBC-YFP-mod0	FALSE
col_1_col_4_LB_1_104596_pUBC-YFP-mod0	wt	3	374	1	TRUE	1:7837180	reverse	1	7837180	LB	LZ156_1	11	TTTCGCCCCTT	0		-8	Col-0	104596	pUBC-YFP-mod0	FALSE
col_1_col_4_LB_1_104596_pUBC-YFP-mod0	wt	4	351	1	TRUE	1:8062043	forward	1	8062043	LB	LZ156_1	3	AGA	0		-1	Col-0	104596	pUBC-YFP-mod0	FALSE
col_1_col_4_LB_1_104596_pUBC-YFP-mod0	wt	3	130	1	TRUE	1:26836748	reverse	1	26836748	LB	LZ156_1	2	CG	0		-11	Col-0	104596	pUBC-YFP-mod0	FALSE
col_1_col_4_LB_1_104596_pUBC-YFP-mod0	wt	3	111	1	TRUE	1:6227930	reverse	1	6227930	LB	LZ156_1	0		1	A	-12	Col-0	104596	pUBC-YFP-mod0	FALSE
col_1_col_4_LB_1_104596_pUBC-YFP-mod0	wt	4	391	1	TRUE	1:23449677	reverse	1	23449677	LB	LZ156_1	0		4	TTTG	-21	Col-0	104596	pUBC-YFP-mod0	FALSE
col_1_col_4_LB_1_104596_pUBC-YFP-mod0	wt	4	487	1	TRUE	1:868947	reverse	1	868947	LB	LZ156_1	0		2	AA	-9	Col-0	104596	pUBC-YFP-mod0	FALSE
col_1_col_4_LB_1_104596_pUBC-YFP-mod0	wt	3	362	1	TRUE	1:7620811	forward	1	7620811	LB	LZ156_1	0		0		-7	Col-0	104596	pUBC-YFP-mod0	FALSE
col_1_col_4_LB_1_104596_pUBC-YFP-mod0	wt	5	294	1	TRUE	2:347352	reverse	2	347352	LB	LZ156_1	0		5	GTTAT	-44	Col-0	104596	pUBC-YFP-mod0	FALSE
col_1_col_4_LB_1_104596_pUBC-YFP-mod0	wt	4	174	0.75	TRUE	2:14483260	reverse	2	14483260	LB	LZ156_1	0		2	GT	-36	Col-0	104596	pUBC-YFP-mod0	FALSE
col_1_col_4_LB_1_104596_pUBC-YFP-mod0	wt	4	465	1	TRUE	2:15037392	forward	2	15037392	LB	LZ156_1	0		8	TGTCTAAG	-31	Col-0	104596	pUBC-YFP-mod0	FALSE
col_1_col_4_LB_1_104596_pUBC-YFP-mod0	wt	3	342	1	TRUE	2:15102213	forward	2	15102213	LB	LZ156_1	0		1	A	-32	Col-0	104596	pUBC-YFP-mod0	FALSE
col_1_col_4_LB_1_104596_pUBC-YFP-mod0	wt	26	451	0.961538	TRUE	2:15208616	reverse	2	15208616	LB	LZ156_1	0		9	TGTCTAAGC	-30	Col-0	104596	pUBC-YFP-mod0	FALSE
col_1_col_4_LB_1_104596_pUBC-YFP-mod0	wt	66	749	0.9	TRUE	2:16119227	forward	2	16119227	LB	LZ156_1	5	CCTAG	0		-50	Col-0	104596	pUBC-YFP-mod0	FALSE
col_1_col_4_LB_1_104596_pUBC-YFP-mod0	wt	4	384	0.75	TRUE	2:16184490	reverse	2	16184490	LB	LZ156_1	0		5	TCAAT	-24	Col-0	104596	pUBC-YFP-mod0	FALSE
col_1_col_4_LB_1_104596_pUBC-YFP-mod0	wt	6	293	1	TRUE	2:18160469	reverse	2	18160469	LB	LZ156_1	0		1	C	-30	Col-0	104596	pUBC-YFP-mod0	FALSE
col_1_col_4_LB_1_104596_pUBC-YFP-mod0	wt	3	287	1	TRUE	2:18438225	forward	2	18438225	LB	LZ156_1	0		0		-64	Col-0	104596	pUBC-YFP-mod0	FALSE
col_1_col_4_LB_1_104596_pUBC-YFP-mod0	wt	7	330	1	TRUE	2:18438246	reverse	2	18438246	LB	LZ156_1	0		5	ACGTC	-57	Col-0	104596	pUBC-YFP-mod0	FALSE
col_1_col_4_LB_1_104596_pUBC-YFP-mod0	wt	3	177	1	TRUE	2:18641615	reverse	2	18641615	LB	LZ156_1	0		2	TC	-35	Col-0	104596	pUBC-YFP-mod0	FALSE
col_1_col_4_LB_1_104596_pUBC-YFP-mod0	wt	4	329	1	TRUE	2:17941588	reverse	2	17941588	LB	LZ156_1	0		1	A	-9	Col-0	104596	pUBC-YFP-mod0	FALSE
col_1_col_4_LB_1_104596_pUBC-YFP-mod0	wt	4	287	1	TRUE	2:18321056	forward	2	18321056	LB	LZ156_1	4	CGGC	0		-23	Col-0	104596	pUBC-YFP-mod0	FALSE
col_1_col_4_LB_1_104596_pUBC-YFP-mod0	wt	3	105	1	TRUE	2:16184479	forward	2	16184479	LB	LZ156_1	3	GCA	0		-9	Col-0	104596	pUBC-YFP-mod0	FALSE
col_1_col_4_LB_1_104596_pUBC-YFP-mod0	wt	3	478	1	TRUE	2:477880	forward	2	477880	LB	LZ156_1	0		0		-13	Col-0	104596	pUBC-YFP-mod0	FALSE
col_1_col_4_LB_1_104596_pUBC-YFP-mod0	wt	3	378	1	TRUE	2:15184742	reverse	2	15184742	LB	LZ156_1	0		5	ATCCT	-1	Col-0	104596	pUBC-YFP-mod0	FALSE
col_1_col_4_LB_1_104596_pUBC-YFP-mod0	wt	11	248	0.818182	TRUE	2:17429105	forward	2	17429105	LB	LZ156_1	12	ACGTCCACAACG	0		-24	Col-0	104596	pUBC-YFP-mod0	FALSE
col_1_col_4_LB_1_104596_pUBC-YFP-mod0	wt	4	191	1	TRUE	2:18439017	forward	2	18439017	LB	LZ156_1	0		3	CCA	-12	Col-0	104596	pUBC-YFP-mod0	FALSE
col_1_col_4_LB_1_104596_pUBC-YFP-mod0	wt	3	229	1	TRUE	2:11963409	forward	2	11963409	LB	LZ156_1	8	GTTGTCTA	0		-25	Col-0	104596	pUBC-YFP-mod0	FALSE
col_1_col_4_LB_1_104596_pUBC-YFP-mod0	wt	5	273	1	TRUE	2:13490880	forward	2	13490880	LB	LZ156_1	0		3	CAA	-9	Col-0	104596	pUBC-YFP-mod0	FALSE
col_1_col_4_LB_1_104596_pUBC-YFP-mod0	wt	20	244	0.8	TRUE	2:17660879	forward	2	17660879	LB	LZ156_1	3	TTA	0		-11	Col-0	104596	pUBC-YFP-mod0	FALSE
col_1_col_4_LB_1_104596_pUBC-YFP-mod0	wt	5	305	1	TRUE	2:18928383	forward	2	18928383	LB	LZ156_1	11	CAGTGGCTCCT	0		-16	Col-0	104596	pUBC-YFP-mod0	FALSE
col_1_col_4_LB_1_104596_pUBC-YFP-mod0	wt	5	333	1	TRUE	2:1393346	reverse	2	1393346	LB	LZ156_1	0		4	TATC	-3	Col-0	104596	pUBC-YFP-mod0	FALSE
col_1_col_4_LB_1_104596_pUBC-YFP-mod0	wt	4	174	0.75	TRUE	2:18361845	forward	2	18361845	LB	LZ156_1	0		5	ATCCT	-1	Col-0	104596	pUBC-YFP-mod0	FALSE
col_1_col_4_LB_1_104596_pUBC-YFP-mod0	wt	3	357	1	TRUE	2:14909787	forward	2	14909787	LB	LZ156_1	1	C	0		-19	Col-0	104596	pUBC-YFP-mod0	FALSE
col_1_col_4_LB_1_104596_pUBC-YFP-mod0	wt	4	190	1	TRUE	2:17495134	forward	2	17495134	LB	LZ156_1	37	AAACTATCAGATTGTTCTTGAGGTGGTCAAATTAGTT	0		-19	Col-0	104596	pUBC-YFP-mod0	FALSE
col_1_col_4_LB_1_104596_pUBC-YFP-mod0	wt	4	316	1	TRUE	2:850416	forward	2	850416	LB	LZ156_1	2	TA	0		-10	Col-0	104596	pUBC-YFP-mod0	FALSE
col_1_col_4_LB_1_104596_pUBC-YFP-mod0	wt	3	298	1	TRUE	2:17808166	reverse	2	17808166	LB	LZ156_1	0		3	CCA	-12	Col-0	104596	pUBC-YFP-mod0	FALSE
col_1_col_4_LB_1_104596_pUBC-YFP-mod0	wt	3	198	1	TRUE	2:16771930	reverse	2	16771930	LB	LZ156_1	40	AATATTCTTTTTATAATATTCTTTTTATAAACGCCCGTCA	0		-31	Col-0	104596	pUBC-YFP-mod0	FALSE
col_1_col_4_LB_1_104596_pUBC-YFP-mod0	wt	4	368	1	TRUE	2:16165707	forward	2	16165707	LB	LZ156_1	12	ATGTATGTGTGT	0		-23	Col-0	104596	pUBC-YFP-mod0	FALSE
col_1_col_4_LB_1_104596_pUBC-YFP-mod0	wt	3	225	1	TRUE	2:15768191	reverse	2	15768191	LB	LZ156_1	0		3	CAC	-11	Col-0	104596	pUBC-YFP-mod0	FALSE
col_1_col_4_LB_1_104596_pUBC-YFP-mod0	wt	4	235	1	TRUE	3:42003	forward	3	42003	LB	LZ156_1	0		0		-47	Col-0	104596	pUBC-YFP-mod0	FALSE
col_1_col_4_LB_1_104596_pUBC-YFP-mod0	wt	12	276	1	TRUE	3:334243	reverse	3	334243	LB	LZ156_1	0		3	TGT	-36	Col-0	104596	pUBC-YFP-mod0	FALSE
col_1_col_4_LB_1_104596_pUBC-YFP-mod0	wt	5	136	0.8	TRUE	3:508598	reverse	3	508598	LB	LZ156_1	0		6	AATTTG	-21	Col-0	104596	pUBC-YFP-mod0	FALSE
col_1_col_4_LB_1_104596_pUBC-YFP-mod0	wt	14	399	0.933333	TRUE	3:911603	reverse	3	911603	LB	LZ156_1	20	CCCTGGCCCTTACCCATTCA	0		-39	Col-0	104596	pUBC-YFP-mod0	FALSE
col_1_col_4_LB_1_104596_pUBC-YFP-mod0	wt	3	285	1	TRUE	3:1890406	reverse	3	1890406	LB	LZ156_1	0		0		-46	Col-0	104596	pUBC-YFP-mod0	FALSE
col_1_col_4_LB_1_104596_pUBC-YFP-mod0	wt	4	179	0.75	TRUE	3:3070702	reverse	3	3070702	LB	LZ156_1	0		4	TTGT	-36	Col-0	104596	pUBC-YFP-mod0	FALSE
col_1_col_4_LB_1_104596_pUBC-YFP-mod0	wt	7	388	1	TRUE	3:8114285	forward	3	8114285	LB	LZ156_1	0		2	AT	-44	Col-0	104596	pUBC-YFP-mod0	FALSE
col_1_col_4_LB_1_104596_pUBC-YFP-mod0	wt	9	547	0.888889	TRUE	3:8434566	reverse	3	8434566	LB	LZ156_1	0		5	TTGTC	-35	Col-0	104596	pUBC-YFP-mod0	FALSE
col_1_col_4_LB_1_104596_pUBC-YFP-mod0	wt	10	215	0.9	TRUE	3:9279201	forward	3	9279201	LB	LZ156_1	5	TATTA	0		-36	Col-0	104596	pUBC-YFP-mod0	FALSE
col_1_col_4_LB_1_104596_pUBC-YFP-mod0	wt	5	207	0.8	TRUE	3:15762056	forward	3	15762056	LB	LZ156_1	0		5	TTGTC	-35	Col-0	104596	pUBC-YFP-mod0	FALSE
col_1_col_4_LB_1_104596_pUBC-YFP-mod0	wt	3	272	1	TRUE	3:18012550	reverse	3	18012550	LB	LZ156_1	0		0		-32	Col-0	104596	pUBC-YFP-mod0	FALSE
col_1_col_4_LB_1_104596_pUBC-YFP-mod0	wt	3	330	1	TRUE	3:19466337	forward	3	19466337	LB	LZ156_1	0		2	TT	-23	Col-0	104596	pUBC-YFP-mod0	FALSE
col_1_col_4_LB_1_104596_pUBC-YFP-mod0	wt	6	237	1	TRUE	3:19466340	reverse	3	19466340	LB	LZ156_1	0		5	AAGCG	-29	Col-0	104596	pUBC-YFP-mod0	FALSE
col_1_col_4_LB_1_104596_pUBC-YFP-mod0	wt	8	181	0.875	TRUE	3:20358236	forward	3	20358236	LB	LZ156_1	0		6	AATGTG	-48	Col-0	104596	pUBC-YFP-mod0	FALSE
col_1_col_4_LB_1_104596_pUBC-YFP-mod0	wt	7	272	1	TRUE	3:21871067	forward	3	21871067	LB	LZ156_1	0		4	TCTA	-33	Col-0	104596	pUBC-YFP-mod0	FALSE
col_1_col_4_LB_1_104596_pUBC-YFP-mod0	wt	6	182	1	TRUE	3:21871114	reverse	3	21871114	LB	LZ156_1	0		3	TCA	-26	Col-0	104596	pUBC-YFP-mod0	FALSE
col_1_col_4_LB_1_104596_pUBC-YFP-mod0	wt	7	292	0.857143	TRUE	3:22154695	reverse	3	22154695	LB	LZ156_1	0		2	AA	-25	Col-0	104596	pUBC-YFP-mod0	FALSE
col_1_col_4_LB_1_104596_pUBC-YFP-mod0	wt	5	310	1	TRUE	3:22618648	forward	3	22618648	LB	LZ156_1	7	GATCGAC	0		-33	Col-0	104596	pUBC-YFP-mod0	FALSE
col_1_col_4_LB_1_104596_pUBC-YFP-mod0	wt	3	232	1	TRUE	3:4751465	reverse	3	4751465	LB	LZ156_1	3	GTG	0		-24	Col-0	104596	pUBC-YFP-mod0	FALSE
col_1_col_4_LB_1_104596_pUBC-YFP-mod0	wt	6	251	1	TRUE	3:19548789	reverse	3	19548789	LB	LZ156_1	3	GTG	0		-24	Col-0	104596	pUBC-YFP-mod0	FALSE
col_1_col_4_LB_1_104596_pUBC-YFP-mod0	wt	10	571	1	TRUE	3:6842130	forward	3	6842130	LB	LZ156_1	0		2	GT	-20	Col-0	104596	pUBC-YFP-mod0	FALSE
col_1_col_4_LB_1_104596_pUBC-YFP-mod0	wt	6	512	0.833333	TRUE	3:9279257	reverse	3	9279257	LB	LZ156_1	0		8	TTTGTTTA	-17	Col-0	104596	pUBC-YFP-mod0	FALSE
col_1_col_4_LB_1_104596_pUBC-YFP-mod0	wt	4	380	1	TRUE	3:7238779	forward	3	7238779	LB	LZ156_1	0		3	ATA	-7	Col-0	104596	pUBC-YFP-mod0	FALSE
col_1_col_4_LB_1_104596_pUBC-YFP-mod0	wt	6	350	0.833333	TRUE	3:22688577	reverse	3	22688577	LB	LZ156_1	3	CCA	0		-8	Col-0	104596	pUBC-YFP-mod0	FALSE
col_1_col_4_LB_1_104596_pUBC-YFP-mod0	wt	28	572	0.933333	TRUE	3:1123727	reverse	3	1123727	LB	LZ156_1	0		5	ACAAT	-8	Col-0	104596	pUBC-YFP-mod0	FALSE
col_1_col_4_LB_1_104596_pUBC-YFP-mod0	wt	6	346	0.833333	TRUE	3:8416247	forward	3	8416247	LB	LZ156_1	0		3	GCC	2	Col-0	104596	pUBC-YFP-mod0	FALSE
col_1_col_4_LB_1_104596_pUBC-YFP-mod0	wt	9	290	1	TRUE	3:19548167	forward	3	19548167	LB	LZ156_1	7	CTGTTGA	0		-22	Col-0	104596	pUBC-YFP-mod0	FALSE
col_1_col_4_LB_1_104596_pUBC-YFP-mod0	wt	5	183	1	TRUE	3:22983908	reverse	3	22983908	LB	LZ156_1	0		2	AT	-8	Col-0	104596	pUBC-YFP-mod0	FALSE
col_1_col_4_LB_1_104596_pUBC-YFP-mod0	wt	9	297	1	TRUE	3:20808184	forward	3	20808184	LB	LZ156_1	0		1	A	-15	Col-0	104596	pUBC-YFP-mod0	FALSE
col_1_col_4_LB_1_104596_pUBC-YFP-mod0	wt	9	329	1	TRUE	3:17001907	forward	3	17001907	LB	LZ156_1	0		2	AT	-8	Col-0	104596	pUBC-YFP-mod0	FALSE
col_1_col_4_LB_1_104596_pUBC-YFP-mod0	wt	14	609	0.928571	TRUE	3:20773273	reverse	3	20773273	LB	LZ156_1	12	ATGCTTAGACAA	0		-9	Col-0	104596	pUBC-YFP-mod0	FALSE
col_1_col_4_LB_1_104596_pUBC-YFP-mod0	wt	5	241	0.8	TRUE	3:19855762	reverse	3	19855762	LB	LZ156_1	1	G	0		-18	Col-0	104596	pUBC-YFP-mod0	FALSE
col_1_col_4_LB_1_104596_pUBC-YFP-mod0	wt	13	263	1	TRUE	3:4507606	forward	3	4507606	LB	LZ156_1	8	TATATTTA	0		-11	Col-0	104596	pUBC-YFP-mod0	FALSE
col_1_col_4_LB_1_104596_pUBC-YFP-mod0	wt	4	191	1	TRUE	3:23336039	forward	3	23336039	LB	LZ156_1	0		3	ATA	-7	Col-0	104596	pUBC-YFP-mod0	FALSE
col_1_col_4_LB_1_104596_pUBC-YFP-mod0	wt	13	255	1	TRUE	3:9260293	reverse	3	9260293	LB	LZ156_1	22	TGGTGTAACAACGAATTTGTTT	0		0	Col-0	104596	pUBC-YFP-mod0	FALSE
col_1_col_4_LB_1_104596_pUBC-YFP-mod0	wt	3	144	1	TRUE	3:22888391	forward	3	22888391	LB	LZ156_1	6	GTGTAT	0		-24	Col-0	104596	pUBC-YFP-mod0	FALSE
col_1_col_4_LB_1_104596_pUBC-YFP-mod0	wt	5	173	0.8	TRUE	3:350196	forward	3	350196	LB	LZ156_1	16	AAGTTTCTTAAGGCAG	0		-7	Col-0	104596	pUBC-YFP-mod0	FALSE
col_1_col_4_LB_1_104596_pUBC-YFP-mod0	wt	3	258	1	TRUE	3:258977	reverse	3	258977	LB	LZ156_1	0		4	AATA	-7	Col-0	104596	pUBC-YFP-mod0	FALSE
col_1_col_4_LB_1_104596_pUBC-YFP-mod0	wt	3	154	1	TRUE	3:2492353	forward	3	2492353	LB	LZ156_1	0		3	CAC	-11	Col-0	104596	pUBC-YFP-mod0	FALSE
col_1_col_4_LB_1_104596_pUBC-YFP-mod0	wt	3	222	1	TRUE	3:3420932	forward	3	3420932	LB	LZ156_1	38	TTCAGAACATGCAAGACTATATAATGGATACACTCTCT	0		-38	Col-0	104596	pUBC-YFP-mod0	FALSE
col_1_col_4_LB_1_104596_pUBC-YFP-mod0	wt	4	163	1	TRUE	3:3185041	forward	3	3185041	LB	LZ156_1	5	TCAGT	0		-6	Col-0	104596	pUBC-YFP-mod0	FALSE
col_1_col_4_LB_1_104596_pUBC-YFP-mod0	wt	5	416	0.8	TRUE	3:17604057	forward	3	17604057	LB	LZ156_1	4	TTCT	0		-6	Col-0	104596	pUBC-YFP-mod0	FALSE
col_1_col_4_LB_1_104596_pUBC-YFP-mod0	wt	3	125	1	TRUE	3:19312447	reverse	3	19312447	LB	LZ156_1	0		0		-14	Col-0	104596	pUBC-YFP-mod0	FALSE
col_1_col_4_LB_1_104596_pUBC-YFP-mod0	wt	4	344	1	TRUE	3:3070700	forward	3	3070700	LB	LZ156_1	0		6	ACAATA	-7	Col-0	104596	pUBC-YFP-mod0	FALSE
col_1_col_4_LB_1_104596_pUBC-YFP-mod0	wt	4	265	1	TRUE	3:20250979	reverse	3	20250979	LB	LZ156_1	0		1	T	-4	Col-0	104596	pUBC-YFP-mod0	FALSE
col_1_col_4_LB_1_104596_pUBC-YFP-mod0	wt	3	511	1	TRUE	3:10501495	reverse	3	10501495	LB	LZ156_1	0		2	CA	-12	Col-0	104596	pUBC-YFP-mod0	FALSE
col_1_col_4_LB_1_104596_pUBC-YFP-mod0	wt	4	167	1	TRUE	Pt:55887	forward	Pt	55887	LB	LZ156_1	17	GATCCATAATCATTGTG	0		-19	Col-0	104596	pUBC-YFP-mod0	FALSE
col_1_col_4_LB_1_104596_pUBC-YFP-mod0	wt	3	168	1	TRUE	4:6405252	forward	4	6405252	LB	LZ156_1	0		1	T	-23	Col-0	104596	pUBC-YFP-mod0	FALSE
col_1_col_4_LB_1_104596_pUBC-YFP-mod0	wt	6	288	1	TRUE	4:7595400	forward	4	7595400	LB	LZ156_1	0		2	TG	-48	Col-0	104596	pUBC-YFP-mod0	FALSE
col_1_col_4_LB_1_104596_pUBC-YFP-mod0	wt	5	154	1	TRUE	4:8486330	reverse	4	8486330	LB	LZ156_1	0		3	GTG	-48	Col-0	104596	pUBC-YFP-mod0	FALSE
col_1_col_4_LB_1_104596_pUBC-YFP-mod0	wt	3	223	1	TRUE	4:9830192	reverse	4	9830192	LB	LZ156_1	0		3	TAA	-32	Col-0	104596	pUBC-YFP-mod0	FALSE
col_1_col_4_LB_1_104596_pUBC-YFP-mod0	wt	3	233	1	TRUE	4:10576929	reverse	4	10576929	LB	LZ156_1	0		1	T	-46	Col-0	104596	pUBC-YFP-mod0	FALSE
col_1_col_4_LB_1_104596_pUBC-YFP-mod0	wt	3	300	1	TRUE	4:11145298	forward	4	11145298	LB	LZ156_1	0		3	CTA	-33	Col-0	104596	pUBC-YFP-mod0	FALSE
col_1_col_4_LB_1_104596_pUBC-YFP-mod0	wt	9	198	1	TRUE	4:13677685	reverse	4	13677685	LB	LZ156_1	0		3	AGT	-39	Col-0	104596	pUBC-YFP-mod0	FALSE
col_1_col_4_LB_1_104596_pUBC-YFP-mod0	wt	4	210	1	TRUE	4:13860743	reverse	4	13860743	LB	LZ156_1	0		3	AAG	-40	Col-0	104596	pUBC-YFP-mod0	FALSE
col_1_col_4_LB_1_104596_pUBC-YFP-mod0	wt	6	333	0.833333	TRUE	4:14581631	reverse	4	14581631	LB	LZ156_1	0		1	T	-47	Col-0	104596	pUBC-YFP-mod0	FALSE
col_1_col_4_LB_1_104596_pUBC-YFP-mod0	wt	3	176	1	TRUE	4:14779722	reverse	4	14779722	LB	LZ156_1	0		1	T	-23	Col-0	104596	pUBC-YFP-mod0	FALSE
col_1_col_4_LB_1_104596_pUBC-YFP-mod0	wt	3	269	1	TRUE	4:15170260	reverse	4	15170260	LB	LZ156_1	0		8	AATGTGTT	-46	Col-0	104596	pUBC-YFP-mod0	FALSE
col_1_col_4_LB_1_104596_pUBC-YFP-mod0	wt	7	262	1	TRUE	4:15580213	forward	4	15580213	LB	LZ156_1	0		2	AA	-25	Col-0	104596	pUBC-YFP-mod0	FALSE
col_1_col_4_LB_1_104596_pUBC-YFP-mod0	wt	4	152	1	TRUE	4:16722116	reverse	4	16722116	LB	LZ156_1	0		4	TCTA	-33	Col-0	104596	pUBC-YFP-mod0	FALSE
col_1_col_4_LB_1_104596_pUBC-YFP-mod0	wt	3	574	1	TRUE	4:16767132	reverse	4	16767132	LB	LZ156_1	0		2	TG	-37	Col-0	104596	pUBC-YFP-mod0	FALSE
col_1_col_4_LB_1_104596_pUBC-YFP-mod0	wt	3	436	1	TRUE	4:18082287	forward	4	18082287	LB	LZ156_1	0		3	ATG	-50	Col-0	104596	pUBC-YFP-mod0	FALSE
col_1_col_4_LB_1_104596_pUBC-YFP-mod0	wt	5	354	1	TRUE	4:18508955	reverse	4	18508955	LB	LZ156_1	30	GGCATCGACTTCAAGGAGGACGCAAACCGC	0		-40	Col-0	104596	pUBC-YFP-mod0	FALSE
col_1_col_4_LB_1_104596_pUBC-YFP-mod0	wt	5	252	1	TRUE	4:16654148	reverse	4	16654148	LB	LZ156_1	0		3	TGT	-20	Col-0	104596	pUBC-YFP-mod0	FALSE
col_1_col_4_LB_1_104596_pUBC-YFP-mod0	wt	9	369	0.777778	TRUE	4:15875504	reverse	4	15875504	LB	LZ156_1	0		7	TTTACAC	-14	Col-0	104596	pUBC-YFP-mod0	FALSE
col_1_col_4_LB_1_104596_pUBC-YFP-mod0	wt	3	194	1	TRUE	4:9296807	reverse	4	9296807	LB	LZ156_1	9	TAGATAATG	0		0	Col-0	104596	pUBC-YFP-mod0	FALSE
col_1_col_4_LB_1_104596_pUBC-YFP-mod0	wt	7	135	1	TRUE	4:16235149	forward	4	16235149	LB	LZ156_1	0		1	A	-9	Col-0	104596	pUBC-YFP-mod0	FALSE
col_1_col_4_LB_1_104596_pUBC-YFP-mod0	wt	8	195	1	TRUE	4:14087063	forward	4	14087063	LB	LZ156_1	8	GTGACACA	0		-21	Col-0	104596	pUBC-YFP-mod0	FALSE
col_1_col_4_LB_1_104596_pUBC-YFP-mod0	wt	3	272	1	TRUE	4:35052	reverse	4	35052	LB	LZ156_1	0		3	CAA	-9	Col-0	104596	pUBC-YFP-mod0	FALSE
col_1_col_4_LB_1_104596_pUBC-YFP-mod0	wt	7	499	1	TRUE	4:233614	reverse	4	233614	LB	LZ156_1	0		2	CA	-15	Col-0	104596	pUBC-YFP-mod0	FALSE
col_1_col_4_LB_1_104596_pUBC-YFP-mod0	wt	12	353	1	TRUE	4:10974694	reverse	4	10974694	LB	LZ156_1	10	TGGTGTAAAC	0		0	Col-0	104596	pUBC-YFP-mod0	FALSE
col_1_col_4_LB_1_104596_pUBC-YFP-mod0	wt	4	292	0.8	TRUE	4:6668783	forward	4	6668783	LB	LZ156_1	10	ATGTATGGAT	0		-30	Col-0	104596	pUBC-YFP-mod0	FALSE
col_1_col_4_LB_1_104596_pUBC-YFP-mod0	wt	4	232	1	TRUE	4:6250487	forward	4	6250487	LB	LZ156_1	0		2	CT	-1	Col-0	104596	pUBC-YFP-mod0	FALSE
col_1_col_4_LB_1_104596_pUBC-YFP-mod0	wt	4	255	1	TRUE	4:9837347	reverse	4	9837347	LB	LZ156_1	0		3	ATA	-5	Col-0	104596	pUBC-YFP-mod0	FALSE
col_1_col_4_LB_1_104596_pUBC-YFP-mod0	wt	4	205	1	TRUE	4:2213413	reverse	4	2213413	LB	LZ156_1	0		6	ATCCTG	0	Col-0	104596	pUBC-YFP-mod0	FALSE
col_1_col_4_LB_1_104596_pUBC-YFP-mod0	wt	4	231	1	TRUE	4:6444891	reverse	4	6444891	LB	LZ156_1	0		2	AA	-9	Col-0	104596	pUBC-YFP-mod0	FALSE
col_1_col_4_LB_1_104596_pUBC-YFP-mod0	wt	3	432	1	TRUE	4:16094317	forward	4	16094317	LB	LZ156_1	2	CA	0		-20	Col-0	104596	pUBC-YFP-mod0	FALSE
col_1_col_4_LB_1_104596_pUBC-YFP-mod0	wt	3	247	1	TRUE	4:9648541	forward	4	9648541	LB	LZ156_1	8	CTTTTAAT	0		-22	Col-0	104596	pUBC-YFP-mod0	FALSE
col_1_col_4_LB_1_104596_pUBC-YFP-mod0	wt	4	398	1	TRUE	4:15955575	forward	4	15955575	LB	LZ156_1	10	CTTGAATTAG	0		-2	Col-0	104596	pUBC-YFP-mod0	FALSE
col_1_col_4_LB_1_104596_pUBC-YFP-mod0	wt	3	291	1	TRUE	4:13844805	forward	4	13844805	LB	LZ156_1	17	CACTATATTGTTTAAAA	0		-30	Col-0	104596	pUBC-YFP-mod0	FALSE
col_1_col_4_LB_1_104596_pUBC-YFP-mod0	wt	16	268	0.941176	TRUE	5:318783	reverse	5	318783	LB	LZ156_1	0		6	TTGTCT	-34	Col-0	104596	pUBC-YFP-mod0	FALSE
col_1_col_4_LB_1_104596_pUBC-YFP-mod0	wt	7	311	1	TRUE	5:1586464	reverse	5	1586464	LB	LZ156_1	4	TATA	0		-51	Col-0	104596	pUBC-YFP-mod0	FALSE
col_1_col_4_LB_1_104596_pUBC-YFP-mod0	wt	4	271	1	TRUE	5:3410103	forward	5	3410103	LB	LZ156_1	0		4	CATT	-66	Col-0	104596	pUBC-YFP-mod0	FALSE
col_1_col_4_LB_1_104596_pUBC-YFP-mod0	wt	5	157	0.8	TRUE	5:3861520	reverse	5	3861520	LB	LZ156_1	0		1	T	-51	Col-0	104596	pUBC-YFP-mod0	FALSE
col_1_col_4_LB_1_104596_pUBC-YFP-mod0	wt	5	366	1	TRUE	5:5157533	forward	5	5157533	LB	LZ156_1	0		3	AAG	-40	Col-0	104596	pUBC-YFP-mod0	FALSE
col_1_col_4_LB_1_104596_pUBC-YFP-mod0	wt	3	197	1	TRUE	5:5247313	forward	5	5247313	LB	LZ156_1	0		1	C	-27	Col-0	104596	pUBC-YFP-mod0	FALSE
col_1_col_4_LB_1_104596_pUBC-YFP-mod0	wt	3	305	1	TRUE	5:7658887	reverse	5	7658887	LB	LZ156_1	1	G	0		-50	Col-0	104596	pUBC-YFP-mod0	FALSE
col_1_col_4_LB_1_104596_pUBC-YFP-mod0	wt	3	428	1	TRUE	5:12379209	forward	5	12379209	LB	LZ156_1	0		5	GTCAA	-25	Col-0	104596	pUBC-YFP-mod0	FALSE
col_1_col_4_LB_1_104596_pUBC-YFP-mod0	wt	3	122	1	TRUE	5:14013621	forward	5	14013621	LB	LZ156_1	0		2	CC	-56	Col-0	104596	pUBC-YFP-mod0	FALSE
col_1_col_4_LB_1_104596_pUBC-YFP-mod0	wt	4	350	1	TRUE	5:16101405	reverse	5	16101405	LB	LZ156_1	4	ACGT	0		-32	Col-0	104596	pUBC-YFP-mod0	FALSE
col_1_col_4_LB_1_104596_pUBC-YFP-mod0	wt	5	751	0.8	TRUE	5:17922242	forward	5	17922242	LB	LZ156_1	0		1	G	-31	Col-0	104596	pUBC-YFP-mod0	FALSE
col_1_col_4_LB_1_104596_pUBC-YFP-mod0	wt	5	228	1	TRUE	5:19285845	forward	5	19285845	LB	LZ156_1	0		5	GCAAT	-51	Col-0	104596	pUBC-YFP-mod0	FALSE
col_1_col_4_LB_1_104596_pUBC-YFP-mod0	wt	5	320	1	TRUE	5:20705228	reverse	5	20705228	LB	LZ156_1	0		4	CCGC	-54	Col-0	104596	pUBC-YFP-mod0	FALSE
col_1_col_4_LB_1_104596_pUBC-YFP-mod0	wt	3	234	1	TRUE	5:21011385	reverse	5	21011385	LB	LZ156_1	0		1	A	-25	Col-0	104596	pUBC-YFP-mod0	FALSE
col_1_col_4_LB_1_104596_pUBC-YFP-mod0	wt	9	311	1	TRUE	5:21865183	forward	5	21865183	LB	LZ156_1	0		0		-35	Col-0	104596	pUBC-YFP-mod0	FALSE
col_1_col_4_LB_1_104596_pUBC-YFP-mod0	wt	5	243	0.8	TRUE	5:22603268	forward	5	22603268	LB	LZ156_1	3	TGT	0		-31	Col-0	104596	pUBC-YFP-mod0	FALSE
col_1_col_4_LB_1_104596_pUBC-YFP-mod0	wt	3	156	1	TRUE	5:24728797	reverse	5	24728797	LB	LZ156_1	6	ACGAAC	0		-32	Col-0	104596	pUBC-YFP-mod0	FALSE
col_1_col_4_LB_1_104596_pUBC-YFP-mod0	wt	5	277	1	TRUE	5:25181472	reverse	5	25181472	LB	LZ156_1	0		1	T	-49	Col-0	104596	pUBC-YFP-mod0	FALSE
col_1_col_4_LB_1_104596_pUBC-YFP-mod0	wt	3	351	1	TRUE	5:25394833	forward	5	25394833	LB	LZ156_1	0		4	CTAA	-32	Col-0	104596	pUBC-YFP-mod0	FALSE
col_1_col_4_LB_1_104596_pUBC-YFP-mod0	wt	3	334	0.75	TRUE	5:25876473	forward	5	25876473	LB	LZ156_1	5	TCATG	0		-36	Col-0	104596	pUBC-YFP-mod0	FALSE
col_1_col_4_LB_1_104596_pUBC-YFP-mod0	wt	3	442	1	TRUE	5:26005942	reverse	5	26005942	LB	LZ156_1	21	TAATGTACCGTAACGTTAATC	0		-46	Col-0	104596	pUBC-YFP-mod0	FALSE
col_1_col_4_LB_1_104596_pUBC-YFP-mod0	wt	8	395	1	TRUE	5:26525057	forward	5	26525057	LB	LZ156_1	0		0		-25	Col-0	104596	pUBC-YFP-mod0	FALSE
col_1_col_4_LB_1_104596_pUBC-YFP-mod0	wt	3	319	1	TRUE	5:503330	forward	5	503330	LB	LZ156_1	0		3	TTT	-18	Col-0	104596	pUBC-YFP-mod0	FALSE
col_1_col_4_LB_1_104596_pUBC-YFP-mod0	wt	4	236	1	TRUE	5:20740480	forward	5	20740480	LB	LZ156_1	1	G	0		-24	Col-0	104596	pUBC-YFP-mod0	FALSE
col_1_col_4_LB_1_104596_pUBC-YFP-mod0	wt	37	601	0.756757	TRUE	5:21916727	forward	5	21916727	LB	LZ156_1	4	TCTT	0		-16	Col-0	104596	pUBC-YFP-mod0	FALSE
col_1_col_4_LB_1_104596_pUBC-YFP-mod0	wt	9	281	1	TRUE	5:16579577	forward	5	16579577	LB	LZ156_1	0		3	ACC	-13	Col-0	104596	pUBC-YFP-mod0	FALSE
col_1_col_4_LB_1_104596_pUBC-YFP-mod0	wt	5	154	1	TRUE	5:304309	reverse	5	304309	LB	LZ156_1	0		8	CCACAATA	-7	Col-0	104596	pUBC-YFP-mod0	FALSE
col_1_col_4_LB_1_104596_pUBC-YFP-mod0	wt	4	284	0.75	TRUE	5:1993366	forward	5	1993366	LB	LZ156_1	0		0		-4	Col-0	104596	pUBC-YFP-mod0	FALSE
col_1_col_4_LB_1_104596_pUBC-YFP-mod0	wt	3	271	1	TRUE	5:25746954	reverse	5	25746954	LB	LZ156_1	0		1	A	-10	Col-0	104596	pUBC-YFP-mod0	FALSE
col_1_col_4_LB_1_104596_pUBC-YFP-mod0	wt	3	324	1	TRUE	5:7606431	reverse	5	7606431	LB	LZ156_1	18	CGGCGTTAATTCAGTACA	0		-23	Col-0	104596	pUBC-YFP-mod0	FALSE
col_1_col_4_LB_1_104596_pUBC-YFP-mod0	wt	5	281	1	TRUE	5:24319801	forward	5	24319801	LB	LZ156_1	2	CA	0		-19	Col-0	104596	pUBC-YFP-mod0	FALSE
col_1_col_4_LB_1_104596_pUBC-YFP-mod0	wt	3	315	1	TRUE	5:21916094	reverse	5	21916094	LB	LZ156_1	0		4	CACC	-13	Col-0	104596	pUBC-YFP-mod0	FALSE
col_1_col_4_LB_1_104596_pUBC-YFP-mod0	wt	5	417	0.8	TRUE	5:15954063	forward	5	15954063	LB	LZ156_1	0		4	TTAC	-16	Col-0	104596	pUBC-YFP-mod0	FALSE
col_1_col_4_LB_1_104596_pUBC-YFP-mod0	wt	7	329	0.857143	TRUE	5:18778311	forward	5	18778311	LB	LZ156_1	3	TTT	0		-8	Col-0	104596	pUBC-YFP-mod0	FALSE
col_1_col_4_LB_1_104596_pUBC-YFP-mod0	wt	3	170	1	TRUE	5:17995014	forward	5	17995014	LB	LZ156_1	0		1	C	-13	Col-0	104596	pUBC-YFP-mod0	FALSE
col_1_col_4_LB_1_104596_pUBC-YFP-mod0	wt	4	169	0.75	TRUE	5:17613839	forward	5	17613839	LB	LZ156_1	16	AAGCGACATGTTACTA	0		-5	Col-0	104596	pUBC-YFP-mod0	FALSE
col_1_col_4_LB_1_104596_pUBC-YFP-mod0	wt	3	368	1	TRUE	5:1414681	forward	5	1414681	LB	LZ156_1	0		4	ACAA	-9	Col-0	104596	pUBC-YFP-mod0	FALSE
col_1_col_4_LB_1_104596_pUBC-YFP-mod0	wt	4	432	1	TRUE	5:21695329	forward	5	21695329	LB	LZ156_1	0		4	ATAT	-6	Col-0	104596	pUBC-YFP-mod0	FALSE
col_1_col_4_LB_1_104596_pUBC-YFP-mod0	wt	3	202	1	TRUE	5:17922271	reverse	5	17922271	LB	LZ156_1	3	TTG	0		0	Col-0	104596	pUBC-YFP-mod0	FALSE
col_1_col_4_LB_1_104596_pUBC-YFP-mod0	wt	3	281	1	TRUE	5:24039048	forward	5	24039048	LB	LZ156_1	0		3	CCT	-1	Col-0	104596	pUBC-YFP-mod0	FALSE
col_1_col_4_LB_1_104596_pUBC-YFP-mod0	wt	3	239	1	TRUE	5:14908267	forward	5	14908267	LB	LZ156_1	0		3	ATC	-3	Col-0	104596	pUBC-YFP-mod0	FALSE
col_1_col_4_LB_1_104596_pUBC-YFP-mod0	wt	4	381	0.75	TRUE	5:18948886	forward	5	18948886	LB	LZ156_1	0		0		-11	Col-0	104596	pUBC-YFP-mod0	FALSE
col_1_col_4_LB_1_104596_pUBC-YFP-mod0	wt	4	227	0.75	TRUE	5:26009577	forward	5	26009577	LB	LZ156_1	11	ACTCGAGATAC	0		0	Col-0	104596	pUBC-YFP-mod0	FALSE
col_1_col_4_LB_1_104596_pUBC-YFP-mod0	wt	3	297	1	TRUE	5:19944905	forward	5	19944905	LB	LZ156_1	0		1	G	0	Col-0	104596	pUBC-YFP-mod0	FALSE
col_1_col_4_LB_1_104596_pUBC-YFP-mod0	wt	4	163	0.75	TRUE	Mt:184821	forward	Mt	184821	LB	LZ156_1	0		4	CTGC	1	Col-0	104596	pUBC-YFP-mod0	FALSE
col_1_col_4_LB_4_104596_pUBC-YFP-mod2	wt	3	179	1	TRUE	1:73933	reverse	1	73933	LB	LZ156_13	0		2	TC	-41	Col-0	104596	pUBC-YFP-mod2	FALSE
col_1_col_4_LB_4_104596_pUBC-YFP-mod2	wt	3	151	1	TRUE	1:1129628	reverse	1	1129628	LB	LZ156_13	0		1	A	-40	Col-0	104596	pUBC-YFP-mod2	FALSE
col_1_col_4_LB_4_104596_pUBC-YFP-mod2	wt	3	219	1	TRUE	1:1434415	forward	1	1434415	LB	LZ156_13	0		1	G	-32	Col-0	104596	pUBC-YFP-mod2	FALSE
col_1_col_4_LB_4_104596_pUBC-YFP-mod2	wt	5	641	0.8	TRUE	1:2454149	forward	1	2454149	LB	LZ156_13	0		1	T	-39	Col-0	104596	pUBC-YFP-mod2	FALSE
col_1_col_4_LB_4_104596_pUBC-YFP-mod2	wt	5	385	1	TRUE	1:3173319	forward	1	3173319	LB	LZ156_13	0		3	ACT	-52	Col-0	104596	pUBC-YFP-mod2	FALSE
col_1_col_4_LB_4_104596_pUBC-YFP-mod2	wt	4	221	1	TRUE	1:4491114	reverse	1	4491114	LB	LZ156_13	5	TGTTG	0		-41	Col-0	104596	pUBC-YFP-mod2	FALSE
col_1_col_4_LB_4_104596_pUBC-YFP-mod2	wt	3	153	1	TRUE	1:6038648	forward	1	6038648	LB	LZ156_13	0		3	CTG	-51	Col-0	104596	pUBC-YFP-mod2	FALSE
col_1_col_4_LB_4_104596_pUBC-YFP-mod2	wt	22	283	0.956522	TRUE	1:7494214	reverse	1	7494214	LB	LZ156_13	1	C	0		-44	Col-0	104596	pUBC-YFP-mod2	FALSE
col_1_col_4_LB_4_104596_pUBC-YFP-mod2	wt	3	249	1	TRUE	1:11092557	forward	1	11092557	LB	LZ156_13	3	GTC	0		-30	Col-0	104596	pUBC-YFP-mod2	FALSE
col_1_col_4_LB_4_104596_pUBC-YFP-mod2	wt	49	541	0.960784	TRUE	1:11908272	forward	1	11908272	LB	LZ156_13	0		3	CCG	-56	Col-0	104596	pUBC-YFP-mod2	FALSE
col_1_col_4_LB_4_104596_pUBC-YFP-mod2	wt	5	161	1	TRUE	1:13684349	reverse	1	13684349	LB	LZ156_13	0		1	T	-42	Col-0	104596	pUBC-YFP-mod2	FALSE
col_1_col_4_LB_4_104596_pUBC-YFP-mod2	wt	6	396	1	TRUE	1:19445535	forward	1	19445535	LB	LZ156_13	0		4	CTTT	-28	Col-0	104596	pUBC-YFP-mod2	FALSE
col_1_col_4_LB_4_104596_pUBC-YFP-mod2	wt	8	288	1	TRUE	1:20224290	forward	1	20224290	LB	LZ156_13	0		3	TGT	-59	Col-0	104596	pUBC-YFP-mod2	FALSE
col_1_col_4_LB_4_104596_pUBC-YFP-mod2	wt	10	152	0.9	TRUE	1:22075059	reverse	1	22075059	LB	LZ156_13	9	AACTGACCT	0		-34	Col-0	104596	pUBC-YFP-mod2	FALSE
col_1_col_4_LB_4_104596_pUBC-YFP-mod2	wt	3	265	1	TRUE	1:22142770	reverse	1	22142770	LB	LZ156_13	0		4	ATTC	-41	Col-0	104596	pUBC-YFP-mod2	FALSE
col_1_col_4_LB_4_104596_pUBC-YFP-mod2	wt	6	232	1	TRUE	1:22589422	reverse	1	22589422	LB	LZ156_13	0		0		-40	Col-0	104596	pUBC-YFP-mod2	FALSE
col_1_col_4_LB_4_104596_pUBC-YFP-mod2	wt	4	181	1	TRUE	1:25636993	forward	1	25636993	LB	LZ156_13	0		4	CTTT	-28	Col-0	104596	pUBC-YFP-mod2	FALSE
col_1_col_4_LB_4_104596_pUBC-YFP-mod2	wt	3	168	1	TRUE	1:28219048	reverse	1	28219048	LB	LZ156_13	0		4	AACT	-52	Col-0	104596	pUBC-YFP-mod2	FALSE
col_1_col_4_LB_4_104596_pUBC-YFP-mod2	wt	3	351	1	TRUE	1:29743510	forward	1	29743510	LB	LZ156_13	4	GAAA	0		-37	Col-0	104596	pUBC-YFP-mod2	FALSE
col_1_col_4_LB_4_104596_pUBC-YFP-mod2	wt	3	241	1	TRUE	1:2440372	reverse	1	2440372	LB	LZ156_13	0		10	GTTCACACCA	-12	Col-0	104596	pUBC-YFP-mod2	FALSE
col_1_col_4_LB_4_104596_pUBC-YFP-mod2	wt	36	412	0.916667	TRUE	1:8314979	reverse	1	8314979	LB	LZ156_13	13	GTGTTACCTTGTT	0		-8	Col-0	104596	pUBC-YFP-mod2	FALSE
col_1_col_4_LB_4_104596_pUBC-YFP-mod2	wt	8	324	1	TRUE	1:8687598	forward	1	8687598	LB	LZ156_13	0		3	AAT	-8	Col-0	104596	pUBC-YFP-mod2	FALSE
col_1_col_4_LB_4_104596_pUBC-YFP-mod2	wt	4	349	1	TRUE	1:20604258	reverse	1	20604258	LB	LZ156_13	4	TTTG	0		-15	Col-0	104596	pUBC-YFP-mod2	FALSE
col_1_col_4_LB_4_104596_pUBC-YFP-mod2	wt	8	307	1	TRUE	1:26923489	reverse	1	26923489	LB	LZ156_13	0		2	AC	-14	Col-0	104596	pUBC-YFP-mod2	FALSE
col_1_col_4_LB_4_104596_pUBC-YFP-mod2	wt	14	374	0.928571	TRUE	1:23689466	reverse	1	23689466	LB	LZ156_13	17	TGATAGAAGTATTTTAC	0		-6	Col-0	104596	pUBC-YFP-mod2	FALSE
col_1_col_4_LB_4_104596_pUBC-YFP-mod2	wt	3	220	1	TRUE	1:7982118	reverse	1	7982118	LB	LZ156_13	0		3	GTT	-19	Col-0	104596	pUBC-YFP-mod2	FALSE
col_1_col_4_LB_4_104596_pUBC-YFP-mod2	wt	4	174	1	TRUE	1:22589417	forward	1	22589417	LB	LZ156_13	14	TGTTACATTGTGGT	0		-4	Col-0	104596	pUBC-YFP-mod2	FALSE
col_1_col_4_LB_4_104596_pUBC-YFP-mod2	wt	4	256	1	TRUE	1:5223067	reverse	1	5223067	LB	LZ156_13	0		5	TCCTG	0	Col-0	104596	pUBC-YFP-mod2	FALSE
col_1_col_4_LB_4_104596_pUBC-YFP-mod2	wt	5	258	0.8	TRUE	1:130567	reverse	1	130567	LB	LZ156_13	0		0		-4	Col-0	104596	pUBC-YFP-mod2	FALSE
col_1_col_4_LB_4_104596_pUBC-YFP-mod2	wt	3	197	1	TRUE	1:1058167	reverse	1	1058167	LB	LZ156_13	19	GTATATGATTCATCCAGGT	0		-27	Col-0	104596	pUBC-YFP-mod2	FALSE
col_1_col_4_LB_4_104596_pUBC-YFP-mod2	wt	14	350	0.928571	TRUE	1:30341124	reverse	1	30341124	LB	LZ156_13	0		5	ATATA	-5	Col-0	104596	pUBC-YFP-mod2	FALSE
col_1_col_4_LB_4_104596_pUBC-YFP-mod2	wt	8	433	0.875	TRUE	1:10243666	reverse	1	10243666	LB	LZ156_13	4	GCTG	0		-14	Col-0	104596	pUBC-YFP-mod2	FALSE
col_1_col_4_LB_4_104596_pUBC-YFP-mod2	wt	4	348	0.75	TRUE	1:20260010	reverse	1	20260010	LB	LZ156_13	7	GTAAAAG	0		-20	Col-0	104596	pUBC-YFP-mod2	FALSE
col_1_col_4_LB_4_104596_pUBC-YFP-mod2	wt	3	231	1	TRUE	1:2217270	forward	1	2217270	LB	LZ156_13	0		1	G	0	Col-0	104596	pUBC-YFP-mod2	FALSE
col_1_col_4_LB_4_104596_pUBC-YFP-mod2	wt	6	278	0.833333	TRUE	1:1341702	forward	1	1341702	LB	LZ156_13	0		3	GTT	-19	Col-0	104596	pUBC-YFP-mod2	FALSE
col_1_col_4_LB_4_104596_pUBC-YFP-mod2	wt	3	446	1	TRUE	1:4820169	forward	1	4820169	LB	LZ156_13	0		3	CTG	0	Col-0	104596	pUBC-YFP-mod2	FALSE
col_1_col_4_LB_4_104596_pUBC-YFP-mod2	wt	3	149	1	TRUE	1:11911484	reverse	1	11911484	LB	LZ156_13	2	TG	0		-24	Col-0	104596	pUBC-YFP-mod2	FALSE
col_1_col_4_LB_4_104596_pUBC-YFP-mod2	wt	3	359	1	TRUE	1:2420450	reverse	1	2420450	LB	LZ156_13	5	AAATA	0		0	Col-0	104596	pUBC-YFP-mod2	FALSE
col_1_col_4_LB_4_104596_pUBC-YFP-mod2	wt	3	217	1	TRUE	1:23211831	reverse	1	23211831	LB	LZ156_13	10	AATGCCTCGA	0		-26	Col-0	104596	pUBC-YFP-mod2	FALSE
col_1_col_4_LB_4_104596_pUBC-YFP-mod2	wt	4	588	0.75	TRUE	1:227245	forward	1	227245	LB	LZ156_13	0		4	CCAC	-11	Col-0	104596	pUBC-YFP-mod2	FALSE
col_1_col_4_LB_4_104596_pUBC-YFP-mod2	wt	3	162	1	TRUE	2:79246	reverse	2	79246	LB	LZ156_13	0		2	TT	-29	Col-0	104596	pUBC-YFP-mod2	FALSE
col_1_col_4_LB_4_104596_pUBC-YFP-mod2	wt	8	286	1	TRUE	2:91104	reverse	2	91104	LB	LZ156_13	8	GGCGTTTA	0		-27	Col-0	104596	pUBC-YFP-mod2	FALSE
col_1_col_4_LB_4_104596_pUBC-YFP-mod2	wt	3	192	1	TRUE	2:440887	forward	2	440887	LB	LZ156_13	0		2	CT	-30	Col-0	104596	pUBC-YFP-mod2	FALSE
col_1_col_4_LB_4_104596_pUBC-YFP-mod2	wt	3	93	1	TRUE	2:504165	reverse	2	504165	LB	LZ156_13	5	CTTGT	0		-55	Col-0	104596	pUBC-YFP-mod2	FALSE
col_1_col_4_LB_4_104596_pUBC-YFP-mod2	wt	3	107	1	TRUE	2:2424404	forward	2	2424404	LB	LZ156_13	3	TTC	0		-41	Col-0	104596	pUBC-YFP-mod2	FALSE
col_1_col_4_LB_4_104596_pUBC-YFP-mod2	wt	5	247	1	TRUE	2:5941631	forward	2	5941631	LB	LZ156_13	2	AC	0		-64	Col-0	104596	pUBC-YFP-mod2	FALSE
col_1_col_4_LB_4_104596_pUBC-YFP-mod2	wt	5	235	1	TRUE	2:8057323	forward	2	8057323	LB	LZ156_13	6	TTACAA	0		-26	Col-0	104596	pUBC-YFP-mod2	FALSE
col_1_col_4_LB_4_104596_pUBC-YFP-mod2	wt	8	268	1	TRUE	2:11666815	reverse	2	11666815	LB	LZ156_13	0		4	TTGA	-44	Col-0	104596	pUBC-YFP-mod2	FALSE
col_1_col_4_LB_4_104596_pUBC-YFP-mod2	wt	13	349	0.923077	TRUE	2:12249421	reverse	2	12249421	LB	LZ156_13	0		4	TCAT	-39	Col-0	104596	pUBC-YFP-mod2	FALSE
col_1_col_4_LB_4_104596_pUBC-YFP-mod2	wt	3	552	1	TRUE	2:12302359	forward	2	12302359	LB	LZ156_13	0		3	TGC	-31	Col-0	104596	pUBC-YFP-mod2	FALSE
col_1_col_4_LB_4_104596_pUBC-YFP-mod2	wt	3	81	1	TRUE	2:15649521	reverse	2	15649521	LB	LZ156_13	0		3	CTT	-29	Col-0	104596	pUBC-YFP-mod2	FALSE
col_1_col_4_LB_4_104596_pUBC-YFP-mod2	wt	3	162	1	TRUE	2:16198327	forward	2	16198327	LB	LZ156_13	0		5	TGATT	-42	Col-0	104596	pUBC-YFP-mod2	FALSE
col_1_col_4_LB_4_104596_pUBC-YFP-mod2	wt	3	234	1	TRUE	2:16308897	reverse	2	16308897	LB	LZ156_13	4	TTAC	0		-35	Col-0	104596	pUBC-YFP-mod2	FALSE
col_1_col_4_LB_4_104596_pUBC-YFP-mod2	wt	4	342	1	TRUE	2:17087799	forward	2	17087799	LB	LZ156_13	0		1	T	-30	Col-0	104596	pUBC-YFP-mod2	FALSE
col_1_col_4_LB_4_104596_pUBC-YFP-mod2	wt	3	189	1	TRUE	2:17688376	forward	2	17688376	LB	LZ156_13	0		2	TT	-46	Col-0	104596	pUBC-YFP-mod2	FALSE
col_1_col_4_LB_4_104596_pUBC-YFP-mod2	wt	5	248	1	TRUE	2:17688415	forward	2	17688415	LB	LZ156_13	1	G	0		-34	Col-0	104596	pUBC-YFP-mod2	FALSE
col_1_col_4_LB_4_104596_pUBC-YFP-mod2	wt	9	239	1	TRUE	2:19607314	forward	2	19607314	LB	LZ156_13	0		2	CA	-26	Col-0	104596	pUBC-YFP-mod2	FALSE
col_1_col_4_LB_4_104596_pUBC-YFP-mod2	wt	9	222	0.888889	TRUE	2:19607355	reverse	2	19607355	LB	LZ156_13	0		1	C	-49	Col-0	104596	pUBC-YFP-mod2	FALSE
col_1_col_4_LB_4_104596_pUBC-YFP-mod2	wt	13	389	1	TRUE	2:16152354	forward	2	16152354	LB	LZ156_13	0		2	AA	-9	Col-0	104596	pUBC-YFP-mod2	FALSE
col_1_col_4_LB_4_104596_pUBC-YFP-mod2	wt	3	533	1	TRUE	2:17422463	forward	2	17422463	LB	LZ156_13	9	TACGTCATC	0		-25	Col-0	104596	pUBC-YFP-mod2	FALSE
col_1_col_4_LB_4_104596_pUBC-YFP-mod2	wt	18	362	0.833333	TRUE	2:12249413	forward	2	12249413	LB	LZ156_13	2	AT	0		-9	Col-0	104596	pUBC-YFP-mod2	FALSE
col_1_col_4_LB_4_104596_pUBC-YFP-mod2	wt	9	383	0.888889	TRUE	2:8142832	forward	2	8142832	LB	LZ156_13	0		0		-15	Col-0	104596	pUBC-YFP-mod2	FALSE
col_1_col_4_LB_4_104596_pUBC-YFP-mod2	wt	5	148	1	TRUE	2:9149606	forward	2	9149606	LB	LZ156_13	0		4	TATC	-3	Col-0	104596	pUBC-YFP-mod2	FALSE
col_1_col_4_LB_4_104596_pUBC-YFP-mod2	wt	5	210	0.8	TRUE	2:19255377	forward	2	19255377	LB	LZ156_13	18	ACTAGAAACTAACACCAC	0		-9	Col-0	104596	pUBC-YFP-mod2	FALSE
col_1_col_4_LB_4_104596_pUBC-YFP-mod2	wt	3	119	1	TRUE	2:16330962	reverse	2	16330962	LB	LZ156_13	16	GAGCTTGGATCAGATG	0		-28	Col-0	104596	pUBC-YFP-mod2	FALSE
col_1_col_4_LB_4_104596_pUBC-YFP-mod2	wt	3	312	1	TRUE	2:17443877	forward	2	17443877	LB	LZ156_13	8	ATAACGTT	0		-9	Col-0	104596	pUBC-YFP-mod2	FALSE
col_1_col_4_LB_4_104596_pUBC-YFP-mod2	wt	3	374	1	TRUE	2:14856825	forward	2	14856825	LB	LZ156_13	17	GACACTCAATGGTCGTC	0		-8	Col-0	104596	pUBC-YFP-mod2	FALSE
col_1_col_4_LB_4_104596_pUBC-YFP-mod2	wt	13	371	0.923077	TRUE	3:34796	reverse	3	34796	LB	LZ156_13	3	GGA	0		-53	Col-0	104596	pUBC-YFP-mod2	FALSE
col_1_col_4_LB_4_104596_pUBC-YFP-mod2	wt	3	364	1	TRUE	3:968636	forward	3	968636	LB	LZ156_13	0		5	TCCGA	-55	Col-0	104596	pUBC-YFP-mod2	FALSE
col_1_col_4_LB_4_104596_pUBC-YFP-mod2	wt	5	216	0.8	TRUE	3:1658063	reverse	3	1658063	LB	LZ156_13	0		3	GAG	-22	Col-0	104596	pUBC-YFP-mod2	FALSE
col_1_col_4_LB_4_104596_pUBC-YFP-mod2	wt	9	370	0.888889	TRUE	3:2197323	reverse	3	2197323	LB	LZ156_13	18	CCTGCCGGTGCCGCCCCG	0		-35	Col-0	104596	pUBC-YFP-mod2	FALSE
col_1_col_4_LB_4_104596_pUBC-YFP-mod2	wt	3	144	1	TRUE	3:2419480	forward	3	2419480	LB	LZ156_13	0		5	TGCTT	-29	Col-0	104596	pUBC-YFP-mod2	FALSE
col_1_col_4_LB_4_104596_pUBC-YFP-mod2	wt	4	124	1	TRUE	3:4243935	forward	3	4243935	LB	LZ156_13	0		3	TCC	-57	Col-0	104596	pUBC-YFP-mod2	FALSE
col_1_col_4_LB_4_104596_pUBC-YFP-mod2	wt	3	361	1	TRUE	3:4299701	forward	3	4299701	LB	LZ156_13	0		4	TCCA	-36	Col-0	104596	pUBC-YFP-mod2	FALSE
col_1_col_4_LB_4_104596_pUBC-YFP-mod2	wt	3	426	1	TRUE	3:5399173	reverse	3	5399173	LB	LZ156_13	0		4	AGGT	-33	Col-0	104596	pUBC-YFP-mod2	FALSE
col_1_col_4_LB_4_104596_pUBC-YFP-mod2	wt	11	295	1	TRUE	3:5495281	forward	3	5495281	LB	LZ156_13	0		4	ATCC	-37	Col-0	104596	pUBC-YFP-mod2	FALSE
col_1_col_4_LB_4_104596_pUBC-YFP-mod2	wt	5	295	1	TRUE	3:5495296	reverse	3	5495296	LB	LZ156_13	19	AGCGTGGTCGCTGTCATCG	0		-34	Col-0	104596	pUBC-YFP-mod2	FALSE
col_1_col_4_LB_4_104596_pUBC-YFP-mod2	wt	9	262	1	TRUE	3:8945999	reverse	3	8945999	LB	LZ156_13	0		4	CTTT	-28	Col-0	104596	pUBC-YFP-mod2	FALSE
col_1_col_4_LB_4_104596_pUBC-YFP-mod2	wt	26	711	0.884615	TRUE	3:16981507	forward	3	16981507	LB	LZ156_13	14	AACGTTATTACTTT	0		-38	Col-0	104596	pUBC-YFP-mod2	FALSE
col_1_col_4_LB_4_104596_pUBC-YFP-mod2	wt	3	260	1	TRUE	3:18494453	reverse	3	18494453	LB	LZ156_13	12	TGCTAGAGTCCG	0		-36	Col-0	104596	pUBC-YFP-mod2	FALSE
col_1_col_4_LB_4_104596_pUBC-YFP-mod2	wt	4	227	1	TRUE	3:20743840	reverse	3	20743840	LB	LZ156_13	9	ATCCATAAG	0		-40	Col-0	104596	pUBC-YFP-mod2	FALSE
col_1_col_4_LB_4_104596_pUBC-YFP-mod2	wt	4	221	1	TRUE	3:23116096	forward	3	23116096	LB	LZ156_13	0		6	AACTGA	-50	Col-0	104596	pUBC-YFP-mod2	FALSE
col_1_col_4_LB_4_104596_pUBC-YFP-mod2	wt	3	271	1	TRUE	3:18492434	reverse	3	18492434	LB	LZ156_13	0		3	TTA	-17	Col-0	104596	pUBC-YFP-mod2	FALSE
col_1_col_4_LB_4_104596_pUBC-YFP-mod2	wt	6	207	1	TRUE	3:8945970	forward	3	8945970	LB	LZ156_13	14	AAAGAGATGAATGG	0		0	Col-0	104596	pUBC-YFP-mod2	FALSE
col_1_col_4_LB_4_104596_pUBC-YFP-mod2	wt	4	428	1	TRUE	3:20719548	reverse	3	20719548	LB	LZ156_13	11	AGATCGACGCG	0		-17	Col-0	104596	pUBC-YFP-mod2	FALSE
col_1_col_4_LB_4_104596_pUBC-YFP-mod2	wt	5	177	0.8	TRUE	3:22579018	forward	3	22579018	LB	LZ156_13	0		2	CA	-12	Col-0	104596	pUBC-YFP-mod2	FALSE
col_1_col_4_LB_4_104596_pUBC-YFP-mod2	wt	7	431	1	TRUE	3:5598719	reverse	3	5598719	LB	LZ156_13	0		3	AAT	-8	Col-0	104596	pUBC-YFP-mod2	FALSE
col_1_col_4_LB_4_104596_pUBC-YFP-mod2	wt	8	219	1	TRUE	3:1072018	forward	3	1072018	LB	LZ156_13	0		2	GG	-21	Col-0	104596	pUBC-YFP-mod2	FALSE
col_1_col_4_LB_4_104596_pUBC-YFP-mod2	wt	3	195	1	TRUE	3:9685224	reverse	3	9685224	LB	LZ156_13	0		0		-3	Col-0	104596	pUBC-YFP-mod2	FALSE
col_1_col_4_LB_4_104596_pUBC-YFP-mod2	wt	4	384	1	TRUE	3:10470474	reverse	3	10470474	LB	LZ156_13	0		3	AAT	-8	Col-0	104596	pUBC-YFP-mod2	FALSE
col_1_col_4_LB_4_104596_pUBC-YFP-mod2	wt	4	183	1	TRUE	3:11905912	reverse	3	11905912	LB	LZ156_13	0		0		-11	Col-0	104596	pUBC-YFP-mod2	FALSE
col_1_col_4_LB_4_104596_pUBC-YFP-mod2	wt	3	348	1	TRUE	3:968643	reverse	3	968643	LB	LZ156_13	17	ACTGTAGGTATCAGGTG	0		-17	Col-0	104596	pUBC-YFP-mod2	FALSE
col_1_col_4_LB_4_104596_pUBC-YFP-mod2	wt	4	250	1	TRUE	3:2252420	forward	3	2252420	LB	LZ156_13	10	GCTTTCAGGA	0		-20	Col-0	104596	pUBC-YFP-mod2	FALSE
col_1_col_4_LB_4_104596_pUBC-YFP-mod2	wt	3	420	1	TRUE	3:550290	reverse	3	550290	LB	LZ156_13	0		2	CC	-2	Col-0	104596	pUBC-YFP-mod2	FALSE
col_1_col_4_LB_4_104596_pUBC-YFP-mod2	wt	6	317	1	TRUE	4:2696163	forward	4	2696163	LB	LZ156_13	0		0		-35	Col-0	104596	pUBC-YFP-mod2	FALSE
col_1_col_4_LB_4_104596_pUBC-YFP-mod2	wt	3	155	0.75	TRUE	4:3507182	reverse	4	3507182	LB	LZ156_13	17	TCTAGGCCACTAATTCT	0		-38	Col-0	104596	pUBC-YFP-mod2	FALSE
col_1_col_4_LB_4_104596_pUBC-YFP-mod2	wt	3	176	1	TRUE	4:7773799	forward	4	7773799	LB	LZ156_13	0		2	CC	-37	Col-0	104596	pUBC-YFP-mod2	FALSE
col_1_col_4_LB_4_104596_pUBC-YFP-mod2	wt	4	104	1	TRUE	4:8916511	forward	4	8916511	LB	LZ156_13	0		3	TGC	-31	Col-0	104596	pUBC-YFP-mod2	FALSE
col_1_col_4_LB_4_104596_pUBC-YFP-mod2	wt	3	813	1	TRUE	4:9252390	reverse	4	9252390	LB	LZ156_13	3	CCT	0		-33	Col-0	104596	pUBC-YFP-mod2	FALSE
col_1_col_4_LB_4_104596_pUBC-YFP-mod2	wt	15	451	0.933333	TRUE	4:11661786	forward	4	11661786	LB	LZ156_13	10	GATATGACCT	0		-34	Col-0	104596	pUBC-YFP-mod2	FALSE
col_1_col_4_LB_4_104596_pUBC-YFP-mod2	wt	3	338	1	TRUE	4:13073256	reverse	4	13073256	LB	LZ156_13	0		3	GGA	-23	Col-0	104596	pUBC-YFP-mod2	FALSE
col_1_col_4_LB_4_104596_pUBC-YFP-mod2	wt	3	181	1	TRUE	4:13545667	forward	4	13545667	LB	LZ156_13	0		3	TCA	-40	Col-0	104596	pUBC-YFP-mod2	FALSE
col_1_col_4_LB_4_104596_pUBC-YFP-mod2	wt	4	222	0.75	TRUE	4:14568345	forward	4	14568345	LB	LZ156_13	0		3	GTG	-32	Col-0	104596	pUBC-YFP-mod2	FALSE
col_1_col_4_LB_4_104596_pUBC-YFP-mod2	wt	9	422	1	TRUE	4:17486289	forward	4	17486289	LB	LZ156_13	0		6	CTTTCA	-26	Col-0	104596	pUBC-YFP-mod2	FALSE
col_1_col_4_LB_4_104596_pUBC-YFP-mod2	wt	35	556	0.971429	TRUE	4:8374432	reverse	4	8374432	LB	LZ156_13	0		7	TCTACAC	-14	Col-0	104596	pUBC-YFP-mod2	FALSE
col_1_col_4_LB_4_104596_pUBC-YFP-mod2	wt	7	365	0.857143	TRUE	4:15638563	reverse	4	15638563	LB	LZ156_13	19	TTCTCGTGACCTTGACTCA	0		-8	Col-0	104596	pUBC-YFP-mod2	FALSE
col_1_col_4_LB_4_104596_pUBC-YFP-mod2	wt	3	355	1	TRUE	4:1464595	reverse	4	1464595	LB	LZ156_13	0		3	AAT	-8	Col-0	104596	pUBC-YFP-mod2	FALSE
col_1_col_4_LB_4_104596_pUBC-YFP-mod2	wt	5	184	0.8	TRUE	4:1127522	forward	4	1127522	LB	LZ156_13	0		2	TC	-3	Col-0	104596	pUBC-YFP-mod2	FALSE
col_1_col_4_LB_4_104596_pUBC-YFP-mod2	wt	4	396	0.75	TRUE	4:242315	reverse	4	242315	LB	LZ156_13	0		4	TTTA	-17	Col-0	104596	pUBC-YFP-mod2	FALSE
col_1_col_4_LB_4_104596_pUBC-YFP-mod2	wt	6	353	1	TRUE	4:12377093	forward	4	12377093	LB	LZ156_13	21	GTAGTTCACACCAGGAGCTCT	0		0	Col-0	104596	pUBC-YFP-mod2	FALSE
col_1_col_4_LB_4_104596_pUBC-YFP-mod2	wt	6	326	1	TRUE	4:17777429	forward	4	17777429	LB	LZ156_13	0		6	ATATAT	-4	Col-0	104596	pUBC-YFP-mod2	FALSE
col_1_col_4_LB_4_104596_pUBC-YFP-mod2	wt	5	238	0.8	TRUE	4:18574579	forward	4	18574579	LB	LZ156_13	0		1	A	-5	Col-0	104596	pUBC-YFP-mod2	FALSE
col_1_col_4_LB_4_104596_pUBC-YFP-mod2	wt	9	537	1	TRUE	4:8916559	reverse	4	8916559	LB	LZ156_13	0		3	CAA	-9	Col-0	104596	pUBC-YFP-mod2	FALSE
col_1_col_4_LB_4_104596_pUBC-YFP-mod2	wt	12	314	0.75	TRUE	4:13319201	forward	4	13319201	LB	LZ156_13	0		1	T	-8	Col-0	104596	pUBC-YFP-mod2	FALSE
col_1_col_4_LB_4_104596_pUBC-YFP-mod2	wt	6	282	1	TRUE	4:92407	forward	4	92407	LB	LZ156_13	0		2	AA	-9	Col-0	104596	pUBC-YFP-mod2	FALSE
col_1_col_4_LB_4_104596_pUBC-YFP-mod2	wt	4	252	1	TRUE	4:12387288	reverse	4	12387288	LB	LZ156_13	3	TTG	0		-3	Col-0	104596	pUBC-YFP-mod2	FALSE
col_1_col_4_LB_4_104596_pUBC-YFP-mod2	wt	3	163	1	TRUE	4:8538356	reverse	4	8538356	LB	LZ156_13	0		1	A	-15	Col-0	104596	pUBC-YFP-mod2	FALSE
col_1_col_4_LB_4_104596_pUBC-YFP-mod2	wt	4	122	0.75	TRUE	4:12387230	forward	4	12387230	LB	LZ156_13	0		0		1	Col-0	104596	pUBC-YFP-mod2	FALSE
col_1_col_4_LB_4_104596_pUBC-YFP-mod2	wt	4	277	0.75	TRUE	4:18285495	forward	4	18285495	LB	LZ156_13	12	ACTGACCTTGAC	0		-23	Col-0	104596	pUBC-YFP-mod2	FALSE
col_1_col_4_LB_4_104596_pUBC-YFP-mod2	wt	4	603	1	TRUE	5:420194	forward	5	420194	LB	LZ156_13	7	TATGATT	0		-28	Col-0	104596	pUBC-YFP-mod2	FALSE
col_1_col_4_LB_4_104596_pUBC-YFP-mod2	wt	3	468	1	TRUE	5:2636641	forward	5	2636641	LB	LZ156_13	0		3	TTC	-27	Col-0	104596	pUBC-YFP-mod2	FALSE
col_1_col_4_LB_4_104596_pUBC-YFP-mod2	wt	5	256	1	TRUE	5:3499483	forward	5	3499483	LB	LZ156_13	0		7	GCTTTCA	-26	Col-0	104596	pUBC-YFP-mod2	FALSE
col_1_col_4_LB_4_104596_pUBC-YFP-mod2	wt	15	263	0.933333	TRUE	5:3692796	forward	5	3692796	LB	LZ156_13	13	GTGGGCCATATAC	0		-41	Col-0	104596	pUBC-YFP-mod2	FALSE
col_1_col_4_LB_4_104596_pUBC-YFP-mod2	wt	3	177	1	TRUE	5:3956152	forward	5	3956152	LB	LZ156_13	0		3	CAG	-35	Col-0	104596	pUBC-YFP-mod2	FALSE
col_1_col_4_LB_4_104596_pUBC-YFP-mod2	wt	4	193	1	TRUE	5:4558069	forward	5	4558069	LB	LZ156_13	4	GAGT	0		-37	Col-0	104596	pUBC-YFP-mod2	FALSE
col_1_col_4_LB_4_104596_pUBC-YFP-mod2	wt	3	268	1	TRUE	5:5572400	forward	5	5572400	LB	LZ156_13	17	TCACATATTAGGGCATC	0		-65	Col-0	104596	pUBC-YFP-mod2	FALSE
col_1_col_4_LB_4_104596_pUBC-YFP-mod2	wt	8	289	0.875	TRUE	5:10719094	forward	5	10719094	LB	LZ156_13	0		6	TGCTTT	-28	Col-0	104596	pUBC-YFP-mod2	FALSE
col_1_col_4_LB_4_104596_pUBC-YFP-mod2	wt	3	191	1	TRUE	5:15763462	reverse	5	15763462	LB	LZ156_13	0		3	TCA	-68	Col-0	104596	pUBC-YFP-mod2	FALSE
col_1_col_4_LB_4_104596_pUBC-YFP-mod2	wt	4	291	1	TRUE	5:17405089	reverse	5	17405089	LB	LZ156_13	0		2	GC	-31	Col-0	104596	pUBC-YFP-mod2	FALSE
col_1_col_4_LB_4_104596_pUBC-YFP-mod2	wt	4	104	1	TRUE	5:17803250	reverse	5	17803250	LB	LZ156_13	2	AT	0		-35	Col-0	104596	pUBC-YFP-mod2	FALSE
col_1_col_4_LB_4_104596_pUBC-YFP-mod2	wt	5	249	1	TRUE	5:18791079	forward	5	18791079	LB	LZ156_13	0		6	TTGATT	-42	Col-0	104596	pUBC-YFP-mod2	FALSE
col_1_col_4_LB_4_104596_pUBC-YFP-mod2	wt	9	246	1	TRUE	5:20905597	reverse	5	20905597	LB	LZ156_13	0		3	TTG	-45	Col-0	104596	pUBC-YFP-mod2	FALSE
col_1_col_4_LB_4_104596_pUBC-YFP-mod2	wt	3	298	1	TRUE	5:21811789	forward	5	21811789	LB	LZ156_13	0		3	GGT	-33	Col-0	104596	pUBC-YFP-mod2	FALSE
col_1_col_4_LB_4_104596_pUBC-YFP-mod2	wt	5	403	1	TRUE	5:25417775	forward	5	25417775	LB	LZ156_13	0		4	TTCA	-26	Col-0	104596	pUBC-YFP-mod2	FALSE
col_1_col_4_LB_4_104596_pUBC-YFP-mod2	wt	4	209	1	TRUE	5:26379910	forward	5	26379910	LB	LZ156_13	0		0		-25	Col-0	104596	pUBC-YFP-mod2	FALSE
col_1_col_4_LB_4_104596_pUBC-YFP-mod2	wt	9	430	1	TRUE	5:24217948	forward	5	24217948	LB	LZ156_13	0		4	TTTA	-17	Col-0	104596	pUBC-YFP-mod2	FALSE
col_1_col_4_LB_4_104596_pUBC-YFP-mod2	wt	7	206	1	TRUE	5:1014706	reverse	5	1014706	LB	LZ156_13	0		3	TTT	-18	Col-0	104596	pUBC-YFP-mod2	FALSE
col_1_col_4_LB_4_104596_pUBC-YFP-mod2	wt	4	215	1	TRUE	5:2292254	reverse	5	2292254	LB	LZ156_13	0		3	ACA	-10	Col-0	104596	pUBC-YFP-mod2	FALSE
col_1_col_4_LB_4_104596_pUBC-YFP-mod2	wt	6	284	1	TRUE	5:7483418	reverse	5	7483418	LB	LZ156_13	0		4	ATAT	-6	Col-0	104596	pUBC-YFP-mod2	FALSE
col_1_col_4_LB_4_104596_pUBC-YFP-mod2	wt	4	657	0.75	TRUE	5:14619113	forward	5	14619113	LB	LZ156_13	0		3	CAA	-9	Col-0	104596	pUBC-YFP-mod2	FALSE
col_1_col_4_LB_4_104596_pUBC-YFP-mod2	wt	4	233	1	TRUE	5:1527745	forward	5	1527745	LB	LZ156_13	0		3	CAC	-11	Col-0	104596	pUBC-YFP-mod2	FALSE
col_1_col_4_LB_4_104596_pUBC-YFP-mod2	wt	5	172	1	TRUE	5:25417783	reverse	5	25417783	LB	LZ156_13	22	AAAGCACCTGGAGGTTTCAGGA	0		0	Col-0	104596	pUBC-YFP-mod2	FALSE
col_1_col_4_LB_4_104596_pUBC-YFP-mod2	wt	4	656	0.75	TRUE	5:7483400	forward	5	7483400	LB	LZ156_13	7	TGATTCG	0		-1	Col-0	104596	pUBC-YFP-mod2	FALSE
col_1_col_4_LB_4_104596_pUBC-YFP-mod2	wt	8	202	0.75	TRUE	5:21823041	forward	5	21823041	LB	LZ156_13	38	TGCTTTCATCCAGGTGCTTTCAGGGCCCATCGAATTTG	0		-24	Col-0	104596	pUBC-YFP-mod2	FALSE
col_1_col_4_LB_4_104596_pUBC-YFP-mod2	wt	5	349	1	TRUE	5:8300918	forward	5	8300918	LB	LZ156_13	26	AACCATTAATGTTCTCTTGTCTTATT	0		-12	Col-0	104596	pUBC-YFP-mod2	FALSE
col_1_col_4_LB_4_104596_pUBC-YFP-mod2	wt	4	113	0.75	TRUE	5:26328806	reverse	5	26328806	LB	LZ156_13	64	GTGGATGCTTGAATTACTGTCTTTCAGGAGGTTCATCCAGGTGCTTTCAGGAGGTTTACACCAC	0		-53	Col-0	104596	pUBC-YFP-mod2	FALSE
col_1_col_4_LB_4_104596_pUBC-YFP-mod2	wt	6	236	0.833333	TRUE	5:9210790	forward	5	9210790	LB	LZ156_13	0		2	TG	0	Col-0	104596	pUBC-YFP-mod2	FALSE
col_1_col_4_LB_4_104596_pUBC-YFP-mod2	wt	3	234	1	TRUE	5:4357345	forward	5	4357345	LB	LZ156_13	10	CGTCTATATC	0		-9	Col-0	104596	pUBC-YFP-mod2	FALSE
col_1_col_4_LB_4_104596_pUBC-YFP-mod2	wt	6	211	0.833333	TRUE	5:10719126	reverse	5	10719126	LB	LZ156_13	0		1	T	-18	Col-0	104596	pUBC-YFP-mod2	FALSE
col_1_col_4_LB_4_104596_pUBC-YFP-mod2	wt	3	224	1	TRUE	5:280382	forward	5	280382	LB	LZ156_13	0		1	T	-6	Col-0	104596	pUBC-YFP-mod2	FALSE
col_1_col_4_LB_4_104596_pUBC-YFP-mod2	wt	3	119	1	TRUE	5:3956191	reverse	5	3956191	LB	LZ156_13	0		2	AT	-6	Col-0	104596	pUBC-YFP-mod2	FALSE
col_1_col_4_LB_4_104596_pUBC-YFP-mod2	wt	5	413	0.8	TRUE	5:7921589	reverse	5	7921589	LB	LZ156_13	6	AAAGCA	0		0	Col-0	104596	pUBC-YFP-mod2	FALSE
col_1_col_4_LB_4_104596_pUBC-YFP-mod2	wt	3	264	1	TRUE	5:21720509	forward	5	21720509	LB	LZ156_13	0		3	CTG	0	Col-0	104596	pUBC-YFP-mod2	FALSE
col_1_col_4_LB_4_104596_pUBC-YFP-mod2	wt	3	180	1	TRUE	5:20454161	reverse	5	20454161	LB	LZ156_13	2	TT	0		-6	Col-0	104596	pUBC-YFP-mod2	FALSE
col_1_col_4_LB_4_104596_pUBC-YFP-mod2	wt	7	308	1	TRUE	5:13057584	reverse	5	13057584	LB	LZ156_13	0		0		-10	Col-0	104596	pUBC-YFP-mod2	FALSE
col_1_col_4_LB_4_104596_pUBC-YFP-mod2	wt	3	144	1	TRUE	5:26942222	forward	5	26942222	LB	LZ156_13	4	AGAG	0		0	Col-0	104596	pUBC-YFP-mod2	FALSE
col_1_col_4_LB_4_104596_pUBC-YFP-mod2	wt	4	330	0.75	TRUE	5:25055926	forward	5	25055926	LB	LZ156_13	6	TCACAT	0		-18	Col-0	104596	pUBC-YFP-mod2	FALSE
col_1_col_4_LB_4_104596_pUBC-YFP-mod2	wt	5	180	1	TRUE	5:20229982	reverse	5	20229982	LB	LZ156_13	0		3	ACA	-15	Col-0	104596	pUBC-YFP-mod2	FALSE
col_1_col_4_LB_4_104596_pUBC-YFP-mod2	wt	3	576	1	TRUE	5:26390939	forward	5	26390939	LB	LZ156_13	2	AA	0		-5	Col-0	104596	pUBC-YFP-mod2	FALSE
col_1_col_4_LB_4_104596_pUBC-YFP-mod2	wt	3	473	1	TRUE	5:9337440	reverse	5	9337440	LB	LZ156_13	0		4	ACAA	-9	Col-0	104596	pUBC-YFP-mod2	FALSE
col_1_col_4_LB_4_104596_pUBC-YFP-mod2	wt	3	153	1	TRUE	5:19919885	forward	5	19919885	LB	LZ156_13	20	CTGACTATGTGTGAAAAGCT	0		-21	Col-0	104596	pUBC-YFP-mod2	FALSE
col_1_col_4_LB_4_104596_pUBC-YFP-mod2	wt	3	327	1	TRUE	5:20229894	forward	5	20229894	LB	LZ156_13	3	AAG	0		0	Col-0	104596	pUBC-YFP-mod2	FALSE
col_1_col_4_LB_4_104596_pUBC-YFP-mod2	wt	4	363	1	TRUE	5:8289357	forward	5	8289357	LB	LZ156_13	5	TGCGG	0		0	Col-0	104596	pUBC-YFP-mod2	FALSE
col_1_col_4_LB_4_104596_pUBC-YFP-mod2	wt	3	270	1	TRUE	5:3539798	forward	5	3539798	LB	LZ156_13	0		3	CTG	0	Col-0	104596	pUBC-YFP-mod2	FALSE
col_1_col_4_LB_1_104596_pUBC-YFP-mod0	wt	18	454	0.944444	TRUE	1:19849068	reverse	1	19849068	LB	LZ156_1	4	TGAA	0		-46	Col-0	104596	pUBC-YFP-mod0	TRUE
col_1_col_4_LB_1_104596_pUBC-YFP-mod0	wt	28	424	0.892857	TRUE	1:19854962	reverse	1	19854962	LB	LZ156_1	0		3	TTA	-45	Col-0	104596	pUBC-YFP-mod0	TRUE
col_1_col_4_LB_1_104596_pUBC-YFP-mod0	wt	15	390	0.866667	TRUE	1:28425094	reverse	1	28425094	LB	LZ156_1	0		3	AAG	-40	Col-0	104596	pUBC-YFP-mod0	TRUE
col_1_col_4_LB_1_104596_pUBC-YFP-mod0	wt	10	292	0.9	TRUE	4:18208766	forward	4	18208766	LB	LZ156_1	0		2	TG	-48	Col-0	104596	pUBC-YFP-mod0	TRUE
col_1_col_4_LB_1_104596_pUBC-YFP-mod0	wt	10	749	0.8	TRUE	4:7298354	reverse	4	7298354	LB	LZ156_1	15	TACTGGTTGACACTA	0		0	Col-0	104596	pUBC-YFP-mod0	TRUE
col_1_col_4_LB_4_104596_pUBC-YFP-mod2	wt	11	108	1	TRUE	5:19395849	reverse	5	19395849	LB	LZ156_13	0		3	CCT	-61	Col-0	104596	pUBC-YFP-mod2	TRUE
col_1_col_4_RB_1_104596_pUBC-YFP-mod0	wt	4	215	1	TRUE	1:630263	reverse	1	630263	RB	LZ156_1	0		1	A	0	Col-0	104596	pUBC-YFP-mod0	FALSE
col_1_col_4_RB_1_104596_pUBC-YFP-mod0	wt	4	196	1	TRUE	1:1143256	reverse	1	1143256	RB	LZ156_1	2	AA	0		-2	Col-0	104596	pUBC-YFP-mod0	FALSE
col_1_col_4_RB_1_104596_pUBC-YFP-mod0	wt	3	203	1	TRUE	1:1331296	forward	1	1331296	RB	LZ156_1	0		0		0	Col-0	104596	pUBC-YFP-mod0	FALSE
col_1_col_4_RB_1_104596_pUBC-YFP-mod0	wt	5	428	1	TRUE	1:4307577	forward	1	4307577	RB	LZ156_1	27	AAAAGAAGCGATCAACGTGGGCGGCCA	0		-2	Col-0	104596	pUBC-YFP-mod0	FALSE
col_1_col_4_RB_1_104596_pUBC-YFP-mod0	wt	4	210	1	TRUE	1:4319513	reverse	1	4319513	RB	LZ156_1	13	TAACATCCGCAAT	0		0	Col-0	104596	pUBC-YFP-mod0	FALSE
col_1_col_4_RB_1_104596_pUBC-YFP-mod0	wt	3	241	1	TRUE	1:4558235	reverse	1	4558235	RB	LZ156_1	0		1	A	0	Col-0	104596	pUBC-YFP-mod0	FALSE
col_1_col_4_RB_1_104596_pUBC-YFP-mod0	wt	3	135	1	TRUE	1:6841129	reverse	1	6841129	RB	LZ156_1	43	GTCCGCCAAGCTGGCCGCTTTATAATTACTTTGTTTAACCACA	0		-13	Col-0	104596	pUBC-YFP-mod0	FALSE
col_1_col_4_RB_1_104596_pUBC-YFP-mod0	wt	7	438	1	TRUE	1:6883264	reverse	1	6883264	RB	LZ156_1	0		1	A	0	Col-0	104596	pUBC-YFP-mod0	FALSE
col_1_col_4_RB_1_104596_pUBC-YFP-mod0	wt	3	301	1	TRUE	1:7267478	forward	1	7267478	RB	LZ156_1	3	AAA	0		0	Col-0	104596	pUBC-YFP-mod0	FALSE
col_1_col_4_RB_1_104596_pUBC-YFP-mod0	wt	6	177	0.833333	TRUE	1:7589062	forward	1	7589062	RB	LZ156_1	0		1	A	0	Col-0	104596	pUBC-YFP-mod0	FALSE
col_1_col_4_RB_1_104596_pUBC-YFP-mod0	wt	4	167	1	TRUE	1:8307252	forward	1	8307252	RB	LZ156_1	16	ACTGCTATTGTGGTTA	0		0	Col-0	104596	pUBC-YFP-mod0	FALSE
col_1_col_4_RB_1_104596_pUBC-YFP-mod0	wt	5	149	1	TRUE	1:12099326	reverse	1	12099326	RB	LZ156_1	3	AAA	0		0	Col-0	104596	pUBC-YFP-mod0	FALSE
col_1_col_4_RB_1_104596_pUBC-YFP-mod0	wt	30	598	0.96875	TRUE	1:18348079	forward	1	18348079	RB	LZ156_1	0		4	TTGA	0	Col-0	104596	pUBC-YFP-mod0	FALSE
col_1_col_4_RB_1_104596_pUBC-YFP-mod0	wt	9	299	1	TRUE	1:18348078	reverse	1	18348078	RB	LZ156_1	0		1	A	0	Col-0	104596	pUBC-YFP-mod0	FALSE
col_1_col_4_RB_1_104596_pUBC-YFP-mod0	wt	5	142	1	TRUE	1:27220289	forward	1	27220289	RB	LZ156_1	1	T	0		0	Col-0	104596	pUBC-YFP-mod0	FALSE
col_1_col_4_RB_1_104596_pUBC-YFP-mod0	wt	4	335	0.75	TRUE	1:27233079	forward	1	27233079	RB	LZ156_1	26	AATTGGGCCCTAAAAAGGTCGGTAAT	0		-2	Col-0	104596	pUBC-YFP-mod0	FALSE
col_1_col_4_RB_1_104596_pUBC-YFP-mod0	wt	3	122	1	TRUE	1:27896489	forward	1	27896489	RB	LZ156_1	0		6	GTTTGA	0	Col-0	104596	pUBC-YFP-mod0	FALSE
col_1_col_4_RB_1_104596_pUBC-YFP-mod0	wt	4	187	1	TRUE	1:28967628	reverse	1	28967628	RB	LZ156_1	7	TAAGCGT	0		0	Col-0	104596	pUBC-YFP-mod0	FALSE
col_1_col_4_RB_1_104596_pUBC-YFP-mod0	wt	3	466	1	TRUE	1:29899073	forward	1	29899073	RB	LZ156_1	0		5	TTTGA	0	Col-0	104596	pUBC-YFP-mod0	FALSE
col_1_col_4_RB_1_104596_pUBC-YFP-mod0	wt	5	218	1	TRUE	1:30338840	reverse	1	30338840	RB	LZ156_1	0		1	A	0	Col-0	104596	pUBC-YFP-mod0	FALSE
col_1_col_4_RB_1_104596_pUBC-YFP-mod0	wt	4	214	0.75	TRUE	1:29122424	reverse	1	29122424	RB	LZ156_1	44	GTACAATTCGGTAACGCTGATAGTTATTAGTCGGCAATTTCACT	0		0	Col-0	104596	pUBC-YFP-mod0	FALSE
col_1_col_4_RB_1_104596_pUBC-YFP-mod0	wt	3	112	1	TRUE	2:85247	reverse	2	85247	RB	LZ156_1	9	CAAACAGAA	0		-1	Col-0	104596	pUBC-YFP-mod0	FALSE
col_1_col_4_RB_1_104596_pUBC-YFP-mod0	wt	9	263	1	TRUE	2:2144563	forward	2	2144563	RB	LZ156_1	0		2	GA	0	Col-0	104596	pUBC-YFP-mod0	FALSE
col_1_col_4_RB_1_104596_pUBC-YFP-mod0	wt	9	552	0.777778	TRUE	2:3057842	reverse	2	3057842	RB	LZ156_1	12	TGTTACATTAAC	0		-1	Col-0	104596	pUBC-YFP-mod0	FALSE
col_1_col_4_RB_1_104596_pUBC-YFP-mod0	wt	8	409	1	TRUE	2:9452496	reverse	2	9452496	RB	LZ156_1	6	CCTAAT	0		-5	Col-0	104596	pUBC-YFP-mod0	FALSE
col_1_col_4_RB_1_104596_pUBC-YFP-mod0	wt	6	343	1	TRUE	2:12152482	forward	2	12152482	RB	LZ156_1	0		1	A	0	Col-0	104596	pUBC-YFP-mod0	FALSE
col_1_col_4_RB_1_104596_pUBC-YFP-mod0	wt	3	191	1	TRUE	2:13556804	forward	2	13556804	RB	LZ156_1	0		2	TG	-1	Col-0	104596	pUBC-YFP-mod0	FALSE
col_1_col_4_RB_1_104596_pUBC-YFP-mod0	wt	3	149	1	TRUE	2:15406956	reverse	2	15406956	RB	LZ156_1	0		2	TG	-1	Col-0	104596	pUBC-YFP-mod0	FALSE
col_1_col_4_RB_1_104596_pUBC-YFP-mod0	wt	9	206	1	TRUE	2:17121002	forward	2	17121002	RB	LZ156_1	0		1	A	0	Col-0	104596	pUBC-YFP-mod0	FALSE
col_1_col_4_RB_1_104596_pUBC-YFP-mod0	wt	3	271	1	TRUE	2:18537915	forward	2	18537915	RB	LZ156_1	1	T	0		1	Col-0	104596	pUBC-YFP-mod0	FALSE
col_1_col_4_RB_1_104596_pUBC-YFP-mod0	wt	4	107	1	TRUE	2:12334419	forward	2	12334419	RB	LZ156_1	43	CGGAAAACCTGATAGTGTTTGATCACTAAAGGTCTAAAGTGGT	0		12	Col-0	104596	pUBC-YFP-mod0	FALSE
col_1_col_4_RB_1_104596_pUBC-YFP-mod0	wt	4	318	1	TRUE	2:12334431	reverse	2	12334431	RB	LZ156_1	62	TCAAACACAATCTGAGCCAAAGTTGGACTATGTATCATTGGCTCAGATTTTTAAACTGAAGA	0		0	Col-0	104596	pUBC-YFP-mod0	FALSE
col_1_col_4_RB_1_104596_pUBC-YFP-mod0	wt	3	532	1	TRUE	3:1535971	reverse	3	1535971	RB	LZ156_1	11	TAACAAATATA	0		0	Col-0	104596	pUBC-YFP-mod0	FALSE
col_1_col_4_RB_1_104596_pUBC-YFP-mod0	wt	3	536	1	TRUE	3:2439078	forward	3	2439078	RB	LZ156_1	0		1	G	-7	Col-0	104596	pUBC-YFP-mod0	FALSE
col_1_col_4_RB_1_104596_pUBC-YFP-mod0	wt	5	289	0.8	TRUE	3:3185067	reverse	3	3185067	RB	LZ156_1	0		5	TTTGA	0	Col-0	104596	pUBC-YFP-mod0	FALSE
col_1_col_4_RB_1_104596_pUBC-YFP-mod0	wt	5	182	1	TRUE	3:4399180	reverse	3	4399180	RB	LZ156_1	14	TCTGCGGAGGGTTT	0		-15	Col-0	104596	pUBC-YFP-mod0	FALSE
col_1_col_4_RB_1_104596_pUBC-YFP-mod0	wt	5	193	1	TRUE	3:5004206	reverse	3	5004206	RB	LZ156_1	0		0		0	Col-0	104596	pUBC-YFP-mod0	FALSE
col_1_col_4_RB_1_104596_pUBC-YFP-mod0	wt	4	170	1	TRUE	3:6007244	forward	3	6007244	RB	LZ156_1	1	G	0		1	Col-0	104596	pUBC-YFP-mod0	FALSE
col_1_col_4_RB_1_104596_pUBC-YFP-mod0	wt	4	199	0.75	TRUE	3:8747654	reverse	3	8747654	RB	LZ156_1	12	CAGTGTTGCCTT	0		-22	Col-0	104596	pUBC-YFP-mod0	FALSE
col_1_col_4_RB_1_104596_pUBC-YFP-mod0	wt	4	172	0.8	TRUE	3:8920286	forward	3	8920286	RB	LZ156_1	0		1	A	0	Col-0	104596	pUBC-YFP-mod0	FALSE
col_1_col_4_RB_1_104596_pUBC-YFP-mod0	wt	4	201	0.75	TRUE	3:17468835	reverse	3	17468835	RB	LZ156_1	10	TTTCCCGCCT	0		-6	Col-0	104596	pUBC-YFP-mod0	FALSE
col_1_col_4_RB_1_104596_pUBC-YFP-mod0	wt	3	234	1	TRUE	3:18445503	reverse	3	18445503	RB	LZ156_1	0		2	GA	0	Col-0	104596	pUBC-YFP-mod0	FALSE
col_1_col_4_RB_1_104596_pUBC-YFP-mod0	wt	3	239	1	TRUE	3:19783720	forward	3	19783720	RB	LZ156_1	0		0		0	Col-0	104596	pUBC-YFP-mod0	FALSE
col_1_col_4_RB_1_104596_pUBC-YFP-mod0	wt	3	176	1	TRUE	3:19855749	forward	3	19855749	RB	LZ156_1	0		1	A	0	Col-0	104596	pUBC-YFP-mod0	FALSE
col_1_col_4_RB_1_104596_pUBC-YFP-mod0	wt	4	294	1	TRUE	3:20358278	reverse	3	20358278	RB	LZ156_1	0		2	TG	-5	Col-0	104596	pUBC-YFP-mod0	FALSE
col_1_col_4_RB_1_104596_pUBC-YFP-mod0	wt	5	427	0.8	TRUE	3:20775254	forward	3	20775254	RB	LZ156_1	29	GTTGCGATCTTTTCAGTAAATGTGTTAAT	0		0	Col-0	104596	pUBC-YFP-mod0	FALSE
col_1_col_4_RB_1_104596_pUBC-YFP-mod0	wt	4	194	1	TRUE	3:20808228	reverse	3	20808228	RB	LZ156_1	0		1	A	0	Col-0	104596	pUBC-YFP-mod0	FALSE
col_1_col_4_RB_1_104596_pUBC-YFP-mod0	wt	4	612	1	TRUE	3:22468677	forward	3	22468677	RB	LZ156_1	0		6	TGTTTG	-1	Col-0	104596	pUBC-YFP-mod0	FALSE
col_1_col_4_RB_1_104596_pUBC-YFP-mod0	wt	8	246	0.875	TRUE	3:22468702	reverse	3	22468702	RB	LZ156_1	0		0		0	Col-0	104596	pUBC-YFP-mod0	FALSE
col_1_col_4_RB_1_104596_pUBC-YFP-mod0	wt	3	107	1	TRUE	3:22972445	reverse	3	22972445	RB	LZ156_1	0		1	A	0	Col-0	104596	pUBC-YFP-mod0	FALSE
col_1_col_4_RB_1_104596_pUBC-YFP-mod0	wt	3	158	1	TRUE	3:2605367	reverse	3	2605367	RB	LZ156_1	42	TCAAACACTTTATGAGATGGGTTTTTATGATTAGAGTCCCGC	0		0	Col-0	104596	pUBC-YFP-mod0	FALSE
col_1_col_4_RB_1_104596_pUBC-YFP-mod0	wt	10	234	1	TRUE	3:7107977	reverse	3	7107977	RB	LZ156_1	59	CATGTGTAACGCAAACACAGTGTTTGCATGTGTTTGTTTACACCACAATCATCTATGTT	0		-1	Col-0	104596	pUBC-YFP-mod0	FALSE
col_1_col_4_RB_1_104596_pUBC-YFP-mod0	wt	5	555	1	TRUE	4:1051498	reverse	4	1051498	RB	LZ156_1	0		1	A	0	Col-0	104596	pUBC-YFP-mod0	FALSE
col_1_col_4_RB_1_104596_pUBC-YFP-mod0	wt	7	324	1	TRUE	4:2218716	forward	4	2218716	RB	LZ156_1	6	TCAAAC	0		0	Col-0	104596	pUBC-YFP-mod0	FALSE
col_1_col_4_RB_1_104596_pUBC-YFP-mod0	wt	3	159	0.857143	TRUE	4:2277117	forward	4	2277117	RB	LZ156_1	42	GTTTCCCGCCTTCAGTTTAAACTATCAGCTTGAGCTTGCATG	0		-9	Col-0	104596	pUBC-YFP-mod0	FALSE
col_1_col_4_RB_1_104596_pUBC-YFP-mod0	wt	5	213	1	TRUE	4:5742028	reverse	4	5742028	RB	LZ156_1	0		1	A	0	Col-0	104596	pUBC-YFP-mod0	FALSE
col_1_col_4_RB_1_104596_pUBC-YFP-mod0	wt	3	220	0.75	TRUE	4:8550379	forward	4	8550379	RB	LZ156_1	0		5	CCTTC	-22	Col-0	104596	pUBC-YFP-mod0	FALSE
col_1_col_4_RB_1_104596_pUBC-YFP-mod0	wt	3	138	1	TRUE	4:8579615	forward	4	8579615	RB	LZ156_1	13	ATCAGTGTTCCCG	0		-24	Col-0	104596	pUBC-YFP-mod0	FALSE
col_1_col_4_RB_1_104596_pUBC-YFP-mod0	wt	3	246	1	TRUE	4:9901142	reverse	4	9901142	RB	LZ156_1	0		3	TGA	0	Col-0	104596	pUBC-YFP-mod0	FALSE
col_1_col_4_RB_1_104596_pUBC-YFP-mod0	wt	3	140	1	TRUE	4:11547149	forward	4	11547149	RB	LZ156_1	0		1	A	0	Col-0	104596	pUBC-YFP-mod0	FALSE
col_1_col_4_RB_1_104596_pUBC-YFP-mod0	wt	6	178	1	TRUE	4:11675349	forward	4	11675349	RB	LZ156_1	0		3	AGT	-19	Col-0	104596	pUBC-YFP-mod0	FALSE
col_1_col_4_RB_1_104596_pUBC-YFP-mod0	wt	4	273	1	TRUE	4:12359600	reverse	4	12359600	RB	LZ156_1	8	AAGTACTG	0		0	Col-0	104596	pUBC-YFP-mod0	FALSE
col_1_col_4_RB_1_104596_pUBC-YFP-mod0	wt	7	249	1	TRUE	4:14581628	forward	4	14581628	RB	LZ156_1	0		3	ACA	2	Col-0	104596	pUBC-YFP-mod0	FALSE
col_1_col_4_RB_1_104596_pUBC-YFP-mod0	wt	3	393	1	TRUE	4:15159219	forward	4	15159219	RB	LZ156_1	24	CAAACGTCCGCATTGTTTGATCCA	0		-18	Col-0	104596	pUBC-YFP-mod0	FALSE
col_1_col_4_RB_1_104596_pUBC-YFP-mod0	wt	4	254	0.75	TRUE	4:15580375	reverse	4	15580375	RB	LZ156_1	0		5	TTTGA	0	Col-0	104596	pUBC-YFP-mod0	FALSE
col_1_col_4_RB_1_104596_pUBC-YFP-mod0	wt	3	309	1	TRUE	5:373969	reverse	5	373969	RB	LZ156_1	27	ACTATCAGTGTTTCCCGCTGCTAATCA	0		0	Col-0	104596	pUBC-YFP-mod0	FALSE
col_1_col_4_RB_1_104596_pUBC-YFP-mod0	wt	3	204	1	TRUE	5:872662	reverse	5	872662	RB	LZ156_1	0		2	TG	-1	Col-0	104596	pUBC-YFP-mod0	FALSE
col_1_col_4_RB_1_104596_pUBC-YFP-mod0	wt	5	455	1	TRUE	5:4128010	reverse	5	4128010	RB	LZ156_1	0		1	C	1	Col-0	104596	pUBC-YFP-mod0	FALSE
col_1_col_4_RB_1_104596_pUBC-YFP-mod0	wt	3	420	1	TRUE	5:4758950	forward	5	4758950	RB	LZ156_1	0		1	C	1	Col-0	104596	pUBC-YFP-mod0	FALSE
col_1_col_4_RB_1_104596_pUBC-YFP-mod0	wt	3	329	1	TRUE	5:4758948	reverse	5	4758948	RB	LZ156_1	0		2	GA	0	Col-0	104596	pUBC-YFP-mod0	FALSE
col_1_col_4_RB_1_104596_pUBC-YFP-mod0	wt	4	150	0.75	TRUE	5:6762662	reverse	5	6762662	RB	LZ156_1	0		2	GA	0	Col-0	104596	pUBC-YFP-mod0	FALSE
col_1_col_4_RB_1_104596_pUBC-YFP-mod0	wt	7	520	1	TRUE	5:9459211	reverse	5	9459211	RB	LZ156_1	9	ATTTGTAGA	0		-8	Col-0	104596	pUBC-YFP-mod0	FALSE
col_1_col_4_RB_1_104596_pUBC-YFP-mod0	wt	4	340	1	TRUE	5:15954112	reverse	5	15954112	RB	LZ156_1	0		2	CT	-12	Col-0	104596	pUBC-YFP-mod0	FALSE
col_1_col_4_RB_1_104596_pUBC-YFP-mod0	wt	3	210	1	TRUE	5:16569223	reverse	5	16569223	RB	LZ156_1	0		1	A	0	Col-0	104596	pUBC-YFP-mod0	FALSE
col_1_col_4_RB_1_104596_pUBC-YFP-mod0	wt	4	180	1	TRUE	5:16579607	reverse	5	16579607	RB	LZ156_1	14	AATTGACGCTTAGA	0		0	Col-0	104596	pUBC-YFP-mod0	FALSE
col_1_col_4_RB_1_104596_pUBC-YFP-mod0	wt	3	189	1	TRUE	5:17104191	reverse	5	17104191	RB	LZ156_1	22	GGGCTGCAACCACTTTCGATGG	0		0	Col-0	104596	pUBC-YFP-mod0	FALSE
col_1_col_4_RB_1_104596_pUBC-YFP-mod0	wt	3	398	1	TRUE	5:19381253	forward	5	19381253	RB	LZ156_1	16	ATAGCGCGCAATCGAT	0		2	Col-0	104596	pUBC-YFP-mod0	FALSE
col_1_col_4_RB_1_104596_pUBC-YFP-mod0	wt	3	205	1	TRUE	5:20704654	reverse	5	20704654	RB	LZ156_1	9	ATTAACTAT	0		0	Col-0	104596	pUBC-YFP-mod0	FALSE
col_1_col_4_RB_1_104596_pUBC-YFP-mod0	wt	5	203	1	TRUE	5:20771100	forward	5	20771100	RB	LZ156_1	0		1	A	0	Col-0	104596	pUBC-YFP-mod0	FALSE
col_1_col_4_RB_1_104596_pUBC-YFP-mod0	wt	6	235	1	TRUE	5:25010481	reverse	5	25010481	RB	LZ156_1	0		5	TGACA	2	Col-0	104596	pUBC-YFP-mod0	FALSE
col_1_col_4_RB_1_104596_pUBC-YFP-mod0	wt	3	196	1	TRUE	5:25046471	reverse	5	25046471	RB	LZ156_1	0		2	AC	1	Col-0	104596	pUBC-YFP-mod0	FALSE
col_1_col_4_RB_1_104596_pUBC-YFP-mod0	wt	4	356	1	TRUE	5:25502842	reverse	5	25502842	RB	LZ156_1	0		0		0	Col-0	104596	pUBC-YFP-mod0	FALSE
col_1_col_4_RB_1_104596_pUBC-YFP-mod0	wt	3	104	1	TRUE	5:25653120	reverse	5	25653120	RB	LZ156_1	0		2	TG	-1	Col-0	104596	pUBC-YFP-mod0	FALSE
col_1_col_4_RB_1_104596_pUBC-YFP-mod0	wt	9	297	1	TRUE	5:26527313	forward	5	26527313	RB	LZ156_1	0		0		0	Col-0	104596	pUBC-YFP-mod0	FALSE
col_1_col_4_RB_1_104596_pUBC-YFP-mod0	wt	6	250	1	TRUE	Mt:41765	forward	Mt	41765	RB	LZ156_1	4	AACG	0		0	Col-0	104596	pUBC-YFP-mod0	FALSE
col_1_col_4_RB_4_104596_pUBC-YFP-mod2	wt	5	216	1	TRUE	1:883432	forward	1	883432	RB	LZ156_13	3	TGG	0		-34	Col-0	104596	pUBC-YFP-mod2	FALSE
col_1_col_4_RB_4_104596_pUBC-YFP-mod2	wt	11	268	0.923077	TRUE	1:6522125	reverse	1	6522125	RB	LZ156_13	37	TCACAAGGTAACGCATCCAGGCCCACAATACATCCAG	0		-34	Col-0	104596	pUBC-YFP-mod2	FALSE
col_1_col_4_RB_4_104596_pUBC-YFP-mod2	wt	49	459	0.938776	TRUE	1:8315014	reverse	1	8315014	RB	LZ156_13	0		5	TGTGA	0	Col-0	104596	pUBC-YFP-mod2	FALSE
col_1_col_4_RB_4_104596_pUBC-YFP-mod2	wt	3	353	1	TRUE	1:11681836	reverse	1	11681836	RB	LZ156_13	11	TCCAGGTGCTT	0		-30	Col-0	104596	pUBC-YFP-mod2	FALSE
col_1_col_4_RB_4_104596_pUBC-YFP-mod2	wt	31	352	0.935484	TRUE	1:11908364	reverse	1	11908364	RB	LZ156_13	0		4	GTGA	0	Col-0	104596	pUBC-YFP-mod2	FALSE
col_1_col_4_RB_4_104596_pUBC-YFP-mod2	wt	5	354	1	TRUE	1:12546452	forward	1	12546452	RB	LZ156_13	8	AGCTTTCA	0		-8	Col-0	104596	pUBC-YFP-mod2	FALSE
col_1_col_4_RB_4_104596_pUBC-YFP-mod2	wt	3	228	0.75	TRUE	1:20967449	forward	1	20967449	RB	LZ156_13	0		0		-32	Col-0	104596	pUBC-YFP-mod2	FALSE
col_1_col_4_RB_4_104596_pUBC-YFP-mod2	wt	3	294	1	TRUE	1:23109674	forward	1	23109674	RB	LZ156_13	0		1	G	-25	Col-0	104596	pUBC-YFP-mod2	FALSE
col_1_col_4_RB_4_104596_pUBC-YFP-mod2	wt	3	228	1	TRUE	1:23192270	reverse	1	23192270	RB	LZ156_13	0		1	C	-29	Col-0	104596	pUBC-YFP-mod2	FALSE
col_1_col_4_RB_4_104596_pUBC-YFP-mod2	wt	29	519	0.896552	TRUE	1:23689426	forward	1	23689426	RB	LZ156_13	9	ATGTATTCA	0		-5	Col-0	104596	pUBC-YFP-mod2	FALSE
col_1_col_4_RB_4_104596_pUBC-YFP-mod2	wt	3	197	1	TRUE	1:25367091	forward	1	25367091	RB	LZ156_13	0		3	GCA	-26	Col-0	104596	pUBC-YFP-mod2	FALSE
col_1_col_4_RB_4_104596_pUBC-YFP-mod2	wt	4	312	1	TRUE	1:28811241	forward	1	28811241	RB	LZ156_13	0		0		-1	Col-0	104596	pUBC-YFP-mod2	FALSE
col_1_col_4_RB_4_104596_pUBC-YFP-mod2	wt	3	136	1	TRUE	1:29199655	reverse	1	29199655	RB	LZ156_13	0		4	GTGA	0	Col-0	104596	pUBC-YFP-mod2	FALSE
col_1_col_4_RB_4_104596_pUBC-YFP-mod2	wt	4	278	1	TRUE	1:13894329	reverse	1	13894329	RB	LZ156_13	0		2	AC	1	Col-0	104596	pUBC-YFP-mod2	FALSE
col_1_col_4_RB_4_104596_pUBC-YFP-mod2	wt	6	207	1	TRUE	1:17452051	forward	1	17452051	RB	LZ156_13	0		2	GA	0	Col-0	104596	pUBC-YFP-mod2	FALSE
col_1_col_4_RB_4_104596_pUBC-YFP-mod2	wt	5	227	0.8	TRUE	1:30258060	reverse	1	30258060	RB	LZ156_13	0		0		0	Col-0	104596	pUBC-YFP-mod2	FALSE
col_1_col_4_RB_4_104596_pUBC-YFP-mod2	wt	3	178	1	TRUE	1:3190868	forward	1	3190868	RB	LZ156_13	17	ATATGAGGACACAGATG	0		0	Col-0	104596	pUBC-YFP-mod2	FALSE
col_1_col_4_RB_4_104596_pUBC-YFP-mod2	wt	11	232	0.909091	TRUE	1:12546476	reverse	1	12546476	RB	LZ156_13	11	GACTTTAGAGG	0		0	Col-0	104596	pUBC-YFP-mod2	FALSE
col_1_col_4_RB_4_104596_pUBC-YFP-mod2	wt	3	157	1	TRUE	1:11542361	forward	1	11542361	RB	LZ156_13	22	GACTTTAGACTGTTCAAGGTAA	0		0	Col-0	104596	pUBC-YFP-mod2	FALSE
col_1_col_4_RB_4_104596_pUBC-YFP-mod2	wt	3	347	1	TRUE	1:4334557	reverse	1	4334557	RB	LZ156_13	4	AAAT	0		0	Col-0	104596	pUBC-YFP-mod2	FALSE
col_1_col_4_RB_4_104596_pUBC-YFP-mod2	wt	3	180	1	TRUE	1:9092640	reverse	1	9092640	RB	LZ156_13	4	TCAG	0		0	Col-0	104596	pUBC-YFP-mod2	FALSE
col_1_col_4_RB_4_104596_pUBC-YFP-mod2	wt	4	200	0.75	TRUE	1:1058160	forward	1	1058160	RB	LZ156_13	14	TCAAAGGAACTGAC	0		0	Col-0	104596	pUBC-YFP-mod2	FALSE
col_1_col_4_RB_4_104596_pUBC-YFP-mod2	wt	6	523	0.833333	TRUE	1:25063305	forward	1	25063305	RB	LZ156_13	0		0		0	Col-0	104596	pUBC-YFP-mod2	FALSE
col_1_col_4_RB_4_104596_pUBC-YFP-mod2	wt	10	268	1	TRUE	1:26323302	reverse	1	26323302	RB	LZ156_13	2	TC	0		0	Col-0	104596	pUBC-YFP-mod2	FALSE
col_1_col_4_RB_4_104596_pUBC-YFP-mod2	wt	3	189	1	TRUE	1:4139885	forward	1	4139885	RB	LZ156_13	7	ATCAACA	0		0	Col-0	104596	pUBC-YFP-mod2	FALSE
col_1_col_4_RB_4_104596_pUBC-YFP-mod2	wt	13	627	0.846154	TRUE	1:29192521	forward	1	29192521	RB	LZ156_13	0		1	A	0	Col-0	104596	pUBC-YFP-mod2	FALSE
col_1_col_4_RB_4_104596_pUBC-YFP-mod2	wt	4	154	1	TRUE	1:9591267	reverse	1	9591267	RB	LZ156_13	1	T	0		0	Col-0	104596	pUBC-YFP-mod2	FALSE
col_1_col_4_RB_4_104596_pUBC-YFP-mod2	wt	3	360	1	TRUE	1:5241024	forward	1	5241024	RB	LZ156_13	0		1	A	0	Col-0	104596	pUBC-YFP-mod2	FALSE
col_1_col_4_RB_4_104596_pUBC-YFP-mod2	wt	3	380	1	TRUE	1:26173749	reverse	1	26173749	RB	LZ156_13	27	CAGGAGGTTTACACCCGCATCGTTTAA	0		-10	Col-0	104596	pUBC-YFP-mod2	FALSE
col_1_col_4_RB_4_104596_pUBC-YFP-mod2	wt	4	317	0.75	TRUE	2:8142857	reverse	2	8142857	RB	LZ156_13	8	AGTTTGCG	0		-3	Col-0	104596	pUBC-YFP-mod2	FALSE
col_1_col_4_RB_4_104596_pUBC-YFP-mod2	wt	3	152	1	TRUE	2:9149641	reverse	2	9149641	RB	LZ156_13	0		2	AC	-5	Col-0	104596	pUBC-YFP-mod2	FALSE
col_1_col_4_RB_4_104596_pUBC-YFP-mod2	wt	6	289	0.833333	TRUE	2:9382356	forward	2	9382356	RB	LZ156_13	0		2	GA	0	Col-0	104596	pUBC-YFP-mod2	FALSE
col_1_col_4_RB_4_104596_pUBC-YFP-mod2	wt	5	139	1	TRUE	2:9382376	reverse	2	9382376	RB	LZ156_13	0		4	GAAC	-15	Col-0	104596	pUBC-YFP-mod2	FALSE
col_1_col_4_RB_4_104596_pUBC-YFP-mod2	wt	10	213	1	TRUE	2:14105562	reverse	2	14105562	RB	LZ156_13	13	CCCAAAGCGTTCT	0		-24	Col-0	104596	pUBC-YFP-mod2	FALSE
col_1_col_4_RB_4_104596_pUBC-YFP-mod2	wt	4	210	0.75	TRUE	2:14891033	reverse	2	14891033	RB	LZ156_13	0		1	G	-9	Col-0	104596	pUBC-YFP-mod2	FALSE
col_1_col_4_RB_4_104596_pUBC-YFP-mod2	wt	13	374	1	TRUE	2:16152406	reverse	2	16152406	RB	LZ156_13	0		5	TGTGA	0	Col-0	104596	pUBC-YFP-mod2	FALSE
col_1_col_4_RB_4_104596_pUBC-YFP-mod2	wt	3	141	1	TRUE	2:16222402	reverse	2	16222402	RB	LZ156_13	1	G	0		-3	Col-0	104596	pUBC-YFP-mod2	FALSE
col_1_col_4_RB_4_104596_pUBC-YFP-mod2	wt	7	245	1	TRUE	2:17570324	reverse	2	17570324	RB	LZ156_13	8	CGTTATTT	0		-31	Col-0	104596	pUBC-YFP-mod2	FALSE
col_1_col_4_RB_4_104596_pUBC-YFP-mod2	wt	7	362	1	TRUE	2:19251895	forward	2	19251895	RB	LZ156_13	0		2	GA	0	Col-0	104596	pUBC-YFP-mod2	FALSE
col_1_col_4_RB_4_104596_pUBC-YFP-mod2	wt	6	124	1	TRUE	2:16460333	forward	2	16460333	RB	LZ156_13	35	GGAAGAGGACTATACGATAATGCAGTTTGGCTGGC	0		0	Col-0	104596	pUBC-YFP-mod2	FALSE
col_1_col_4_RB_4_104596_pUBC-YFP-mod2	wt	4	120	0.75	TRUE	2:773460	forward	2	773460	RB	LZ156_13	0		2	GA	0	Col-0	104596	pUBC-YFP-mod2	FALSE
col_1_col_4_RB_4_104596_pUBC-YFP-mod2	wt	3	186	1	TRUE	3:2419481	reverse	3	2419481	RB	LZ156_13	0		1	G	-1	Col-0	104596	pUBC-YFP-mod2	FALSE
col_1_col_4_RB_4_104596_pUBC-YFP-mod2	wt	4	284	1	TRUE	3:2976532	reverse	3	2976532	RB	LZ156_13	0		2	GA	0	Col-0	104596	pUBC-YFP-mod2	FALSE
col_1_col_4_RB_4_104596_pUBC-YFP-mod2	wt	12	285	1	TRUE	3:3201140	forward	3	3201140	RB	LZ156_13	0		2	TG	-3	Col-0	104596	pUBC-YFP-mod2	FALSE
col_1_col_4_RB_4_104596_pUBC-YFP-mod2	wt	23	348	1	TRUE	3:3201200	reverse	3	3201200	RB	LZ156_13	0		3	GAC	-5	Col-0	104596	pUBC-YFP-mod2	FALSE
col_1_col_4_RB_4_104596_pUBC-YFP-mod2	wt	7	199	0.857143	TRUE	3:4085364	reverse	3	4085364	RB	LZ156_13	0		1	A	0	Col-0	104596	pUBC-YFP-mod2	FALSE
col_1_col_4_RB_4_104596_pUBC-YFP-mod2	wt	5	248	1	TRUE	3:10470255	forward	3	10470255	RB	LZ156_13	0		2	CT	-12	Col-0	104596	pUBC-YFP-mod2	FALSE
col_1_col_4_RB_4_104596_pUBC-YFP-mod2	wt	3	100	1	TRUE	3:18491573	forward	3	18491573	RB	LZ156_13	0		3	TTG	-9	Col-0	104596	pUBC-YFP-mod2	FALSE
col_1_col_4_RB_4_104596_pUBC-YFP-mod2	wt	4	521	1	TRUE	3:22579041	reverse	3	22579041	RB	LZ156_13	8	CGGCTGTC	0		-7	Col-0	104596	pUBC-YFP-mod2	FALSE
col_1_col_4_RB_4_104596_pUBC-YFP-mod2	wt	3	512	1	TRUE	3:22606399	reverse	3	22606399	RB	LZ156_13	2	AG	0		-9	Col-0	104596	pUBC-YFP-mod2	FALSE
col_1_col_4_RB_4_104596_pUBC-YFP-mod2	wt	5	293	0.8	TRUE	3:18196882	reverse	3	18196882	RB	LZ156_13	30	AATCTCCGGGAGCCCACAATATATCCTGGG	0		0	Col-0	104596	pUBC-YFP-mod2	FALSE
col_1_col_4_RB_4_104596_pUBC-YFP-mod2	wt	7	230	1	TRUE	3:4622237	reverse	3	4622237	RB	LZ156_13	0		0		0	Col-0	104596	pUBC-YFP-mod2	FALSE
col_1_col_4_RB_4_104596_pUBC-YFP-mod2	wt	4	302	0.75	TRUE	3:1241043	reverse	3	1241043	RB	LZ156_13	9	TAAGATTCA	0		0	Col-0	104596	pUBC-YFP-mod2	FALSE
col_1_col_4_RB_4_104596_pUBC-YFP-mod2	wt	3	490	1	TRUE	3:343556	reverse	3	343556	RB	LZ156_13	0		1	A	0	Col-0	104596	pUBC-YFP-mod2	FALSE
col_1_col_4_RB_4_104596_pUBC-YFP-mod2	wt	3	194	1	TRUE	3:22118245	reverse	3	22118245	RB	LZ156_13	24	ATACATTCTATTCGCAACCAGAGA	0		0	Col-0	104596	pUBC-YFP-mod2	FALSE
col_1_col_4_RB_4_104596_pUBC-YFP-mod2	wt	4	125	1	TRUE	3:4388373	reverse	3	4388373	RB	LZ156_13	0		2	GA	0	Col-0	104596	pUBC-YFP-mod2	FALSE
col_1_col_4_RB_4_104596_pUBC-YFP-mod2	wt	3	170	1	TRUE	3:19500416	forward	3	19500416	RB	LZ156_13	1	A	0		0	Col-0	104596	pUBC-YFP-mod2	FALSE
col_1_col_4_RB_4_104596_pUBC-YFP-mod2	wt	3	215	1	TRUE	3:6002301	reverse	3	6002301	RB	LZ156_13	7	ATTGAAG	0		-2	Col-0	104596	pUBC-YFP-mod2	FALSE
col_1_col_4_RB_4_104596_pUBC-YFP-mod2	wt	4	597	1	TRUE	4:5494857	forward	4	5494857	RB	LZ156_13	0		1	G	-34	Col-0	104596	pUBC-YFP-mod2	FALSE
col_1_col_4_RB_4_104596_pUBC-YFP-mod2	wt	3	241	1	TRUE	4:7226276	reverse	4	7226276	RB	LZ156_13	4	CAAG	0		-11	Col-0	104596	pUBC-YFP-mod2	FALSE
col_1_col_4_RB_4_104596_pUBC-YFP-mod2	wt	4	206	0.75	TRUE	4:10850475	forward	4	10850475	RB	LZ156_13	22	AATGGTATTGCTTTAATGGTAT	0		-10	Col-0	104596	pUBC-YFP-mod2	FALSE
col_1_col_4_RB_4_104596_pUBC-YFP-mod2	wt	3	112	1	TRUE	4:12930122	forward	4	12930122	RB	LZ156_13	0		0		-1	Col-0	104596	pUBC-YFP-mod2	FALSE
col_1_col_4_RB_4_104596_pUBC-YFP-mod2	wt	3	111	1	TRUE	4:13319222	reverse	4	13319222	RB	LZ156_13	0		0		-1	Col-0	104596	pUBC-YFP-mod2	FALSE
col_1_col_4_RB_4_104596_pUBC-YFP-mod2	wt	7	225	1	TRUE	4:13389906	forward	4	13389906	RB	LZ156_13	0		2	GA	0	Col-0	104596	pUBC-YFP-mod2	FALSE
col_1_col_4_RB_4_104596_pUBC-YFP-mod2	wt	5	394	1	TRUE	4:17486321	reverse	4	17486321	RB	LZ156_13	0		2	GG	-8	Col-0	104596	pUBC-YFP-mod2	FALSE
col_1_col_4_RB_4_104596_pUBC-YFP-mod2	wt	3	160	1	TRUE	4:955353	reverse	4	955353	RB	LZ156_13	5	ACCGA	0		0	Col-0	104596	pUBC-YFP-mod2	FALSE
col_1_col_4_RB_4_104596_pUBC-YFP-mod2	wt	3	211	1	TRUE	4:11567720	forward	4	11567720	RB	LZ156_13	0		0		0	Col-0	104596	pUBC-YFP-mod2	FALSE
col_1_col_4_RB_4_104596_pUBC-YFP-mod2	wt	3	157	1	TRUE	4:92409	reverse	4	92409	RB	LZ156_13	0		0		0	Col-0	104596	pUBC-YFP-mod2	FALSE
col_1_col_4_RB_4_104596_pUBC-YFP-mod2	wt	8	211	0.875	TRUE	4:18451548	forward	4	18451548	RB	LZ156_13	4	TATT	0		0	Col-0	104596	pUBC-YFP-mod2	FALSE
col_1_col_4_RB_4_104596_pUBC-YFP-mod2	wt	4	426	1	TRUE	4:16931567	reverse	4	16931567	RB	LZ156_13	6	TTGCGT	0		-2	Col-0	104596	pUBC-YFP-mod2	FALSE
col_1_col_4_RB_4_104596_pUBC-YFP-mod2	wt	15	441	0.933333	TRUE	5:423641	reverse	5	423641	RB	LZ156_13	0		2	GC	-13	Col-0	104596	pUBC-YFP-mod2	FALSE
col_1_col_4_RB_4_104596_pUBC-YFP-mod2	wt	5	302	1	TRUE	5:424395	forward	5	424395	RB	LZ156_13	0		1	A	-19	Col-0	104596	pUBC-YFP-mod2	FALSE
col_1_col_4_RB_4_104596_pUBC-YFP-mod2	wt	5	349	0.8	TRUE	5:3499509	reverse	5	3499509	RB	LZ156_13	10	ATCTCAGGAG	0		-5	Col-0	104596	pUBC-YFP-mod2	FALSE
col_1_col_4_RB_4_104596_pUBC-YFP-mod2	wt	3	269	1	TRUE	5:7761601	forward	5	7761601	RB	LZ156_13	0		2	GG	-7	Col-0	104596	pUBC-YFP-mod2	FALSE
col_1_col_4_RB_4_104596_pUBC-YFP-mod2	wt	4	192	0.75	TRUE	5:9209462	reverse	5	9209462	RB	LZ156_13	1	C	0		-24	Col-0	104596	pUBC-YFP-mod2	FALSE
col_1_col_4_RB_4_104596_pUBC-YFP-mod2	wt	4	271	1	TRUE	5:9508228	forward	5	9508228	RB	LZ156_13	0		3	TGA	0	Col-0	104596	pUBC-YFP-mod2	FALSE
col_1_col_4_RB_4_104596_pUBC-YFP-mod2	wt	5	356	0.8	TRUE	5:13910409	forward	5	13910409	RB	LZ156_13	0		6	ACTGTG	-1	Col-0	104596	pUBC-YFP-mod2	FALSE
col_1_col_4_RB_4_104596_pUBC-YFP-mod2	wt	5	322	1	TRUE	5:19395762	forward	5	19395762	RB	LZ156_13	11	CGTTCAAGCCT	0		-11	Col-0	104596	pUBC-YFP-mod2	FALSE
col_1_col_4_RB_4_104596_pUBC-YFP-mod2	wt	8	267	0.875	TRUE	5:19521434	reverse	5	19521434	RB	LZ156_13	0		1	G	-1	Col-0	104596	pUBC-YFP-mod2	FALSE
col_1_col_4_RB_4_104596_pUBC-YFP-mod2	wt	4	250	1	TRUE	5:20905567	forward	5	20905567	RB	LZ156_13	0		0		-5	Col-0	104596	pUBC-YFP-mod2	FALSE
col_1_col_4_RB_4_104596_pUBC-YFP-mod2	wt	4	233	1	TRUE	5:26391756	reverse	5	26391756	RB	LZ156_13	9	TGAATCACG	0		0	Col-0	104596	pUBC-YFP-mod2	FALSE
col_1_col_4_RB_4_104596_pUBC-YFP-mod2	wt	3	97	1	TRUE	5:2292227	forward	5	2292227	RB	LZ156_13	0		0		0	Col-0	104596	pUBC-YFP-mod2	FALSE
col_1_col_4_RB_4_104596_pUBC-YFP-mod2	wt	3	130	1	TRUE	5:23142576	forward	5	23142576	RB	LZ156_13	0		1	A	0	Col-0	104596	pUBC-YFP-mod2	FALSE
col_1_col_4_RB_4_104596_pUBC-YFP-mod2	wt	3	184	1	TRUE	5:5237006	reverse	5	5237006	RB	LZ156_13	0		1	A	0	Col-0	104596	pUBC-YFP-mod2	FALSE
col_1_col_4_RB_4_104596_pUBC-YFP-mod2	wt	13	375	1	TRUE	5:21823048	reverse	5	21823048	RB	LZ156_13	15	TGAGCAGCAAAAACA	0		-2	Col-0	104596	pUBC-YFP-mod2	FALSE
col_1_col_4_RB_4_104596_pUBC-YFP-mod2	wt	13	282	0.875	TRUE	4:15883541	reverse	4	15883541	RB	LZ156_13	20	TGGTGCAACTGAACAATTCA	0		-35	Col-0	104596	pUBC-YFP-mod2	TRUE
col_1_col_4_RB_1_104596_pUBC-YFP-mod0	wt	18	289	1	TRUE	4:6673824	forward	4	6673824	RB	LZ156_1	0		0		0	Col-0	104596	pUBC-YFP-mod0	TRUE
teb_1_teb_4_LB_1_104596_pUBC-YFP-mod0	teb	123	654	0.830645	TRUE	1:17920094	reverse	1	17920094	LB	LZ157_2	0		1	A	-25	Col-0	104596	pUBC-YFP-mod0	FALSE
teb_1_teb_4_LB_1_104596_pUBC-YFP-mod0	teb	78	744	0.9	TRUE	4:519397	reverse	4	519397	LB	LZ157_2	0		3	TTA	-45	Col-0	104596	pUBC-YFP-mod0	FALSE
teb_1_teb_4_LB_4_104596_pUBC-YFP-mod2	teb	5	216	1	TRUE	2:8522603	reverse	2	8522603	LB	LZ157_6	0		2	TC	-41	Col-0	104596	pUBC-YFP-mod2	FALSE
teb_1_teb_4_LB_4_104596_pUBC-YFP-mod2	teb	7	628	1	TRUE	3:17125709	forward	3	17125709	LB	LZ157_6	0		0		-60	Col-0	104596	pUBC-YFP-mod2	FALSE
teb_1_teb_4_LB_4_104596_pUBC-YFP-mod2	teb	7	359	1	TRUE	4:7663753	forward	4	7663753	LB	LZ157_6	0		0		-49	Col-0	104596	pUBC-YFP-mod2	FALSE
teb_1_teb_4_LB_4_104596_pUBC-YFP-mod2	teb	7	359	1	TRUE	5:7519336	reverse	5	7519336	LB	LZ157_6	1	A	0		-31	Col-0	104596	pUBC-YFP-mod2	FALSE
teb_1_teb_4_RB_1_104596_pUBC-YFP-mod0	teb	45	405	0.955556	TRUE	3:7283101	forward	3	7283101	RB	LZ157_2	1	T	0		0	Col-0	104596	pUBC-YFP-mod0	FALSE
teb_1_teb_4_RB_1_104596_pUBC-YFP-mod0	teb	57	635	0.916667	TRUE	4:9780024	forward	4	9780024	RB	LZ157_2	0		0		0	Col-0	104596	pUBC-YFP-mod0	FALSE
col_1_teb_4_LB_1_104596_pUBC-YFP-mod0	wt	21	609	1	TRUE	1:266348	forward	1	266348	LB	LZ156_1	0		1	C	-27	Col-0	104596	pUBC-YFP-mod0	FALSE
col_1_teb_4_LB_1_104596_pUBC-YFP-mod0	wt	3	378	1	TRUE	1:392835	reverse	1	392835	LB	LZ156_1	0		3	GTG	-48	Col-0	104596	pUBC-YFP-mod0	FALSE
col_1_teb_4_LB_1_104596_pUBC-YFP-mod0	wt	4	346	0.75	TRUE	1:532390	reverse	1	532390	LB	LZ156_1	9	ATAAGTTGT	0		-28	Col-0	104596	pUBC-YFP-mod0	FALSE
col_1_teb_4_LB_1_104596_pUBC-YFP-mod0	wt	3	213	1	TRUE	1:1429717	reverse	1	1429717	LB	LZ156_1	0		3	AAG	-40	Col-0	104596	pUBC-YFP-mod0	FALSE
col_1_teb_4_LB_1_104596_pUBC-YFP-mod0	wt	4	337	1	TRUE	1:1660169	forward	1	1660169	LB	LZ156_1	4	TTGT	0		-51	Col-0	104596	pUBC-YFP-mod0	FALSE
col_1_teb_4_LB_1_104596_pUBC-YFP-mod0	wt	5	301	0.8	TRUE	1:2487081	forward	1	2487081	LB	LZ156_1	0		8	CCAATTTG	-21	Col-0	104596	pUBC-YFP-mod0	FALSE
col_1_teb_4_LB_1_104596_pUBC-YFP-mod0	wt	6	225	0.833333	TRUE	1:2685757	reverse	1	2685757	LB	LZ156_1	0		2	GT	-39	Col-0	104596	pUBC-YFP-mod0	FALSE
col_1_teb_4_LB_1_104596_pUBC-YFP-mod0	wt	11	330	0.909091	TRUE	1:3406547	forward	1	3406547	LB	LZ156_1	0		2	CA	-26	Col-0	104596	pUBC-YFP-mod0	FALSE
col_1_teb_4_LB_1_104596_pUBC-YFP-mod0	wt	23	556	0.913043	TRUE	1:3922328	forward	1	3922328	LB	LZ156_1	0		2	TC	-35	Col-0	104596	pUBC-YFP-mod0	FALSE
col_1_teb_4_LB_1_104596_pUBC-YFP-mod0	wt	4	414	1	TRUE	1:4761684	reverse	1	4761684	LB	LZ156_1	5	CGTTT	0		-44	Col-0	104596	pUBC-YFP-mod0	FALSE
col_1_teb_4_LB_1_104596_pUBC-YFP-mod0	wt	44	516	0.886364	TRUE	1:5144452	forward	1	5144452	LB	LZ156_1	23	GTGTTATTAAGAGTATTGATACA	0		-24	Col-0	104596	pUBC-YFP-mod0	FALSE
col_1_teb_4_LB_1_104596_pUBC-YFP-mod0	wt	6	275	1	TRUE	1:5408952	forward	1	5408952	LB	LZ156_1	0		2	AT	-44	Col-0	104596	pUBC-YFP-mod0	FALSE
col_1_teb_4_LB_1_104596_pUBC-YFP-mod0	wt	4	152	0.75	TRUE	1:5970456	reverse	1	5970456	LB	LZ156_1	14	GCAATGTGTTATCC	0		-13	Col-0	104596	pUBC-YFP-mod0	FALSE
col_1_teb_4_LB_1_104596_pUBC-YFP-mod0	wt	16	340	0.9375	TRUE	1:7119704	forward	1	7119704	LB	LZ156_1	6	CTGAAT	0		-63	Col-0	104596	pUBC-YFP-mod0	FALSE
col_1_teb_4_LB_1_104596_pUBC-YFP-mod0	wt	16	404	1	TRUE	1:7589081	reverse	1	7589081	LB	LZ156_1	0		3	AAT	-24	Col-0	104596	pUBC-YFP-mod0	FALSE
col_1_teb_4_LB_1_104596_pUBC-YFP-mod0	wt	17	346	0.882353	TRUE	1:8062044	reverse	1	8062044	LB	LZ156_1	4	ACGT	0		-32	Col-0	104596	pUBC-YFP-mod0	FALSE
col_1_teb_4_LB_1_104596_pUBC-YFP-mod0	wt	9	440	1	TRUE	1:9667867	reverse	1	9667867	LB	LZ156_1	0		3	AAA	-61	Col-0	104596	pUBC-YFP-mod0	FALSE
col_1_teb_4_LB_1_104596_pUBC-YFP-mod0	wt	12	405	0.916667	TRUE	1:9832116	forward	1	9832116	LB	LZ156_1	0		2	GC	-30	Col-0	104596	pUBC-YFP-mod0	FALSE
col_1_teb_4_LB_1_104596_pUBC-YFP-mod0	wt	9	432	0.8	TRUE	1:9832187	reverse	1	9832187	LB	LZ156_1	0		4	CATT	-66	Col-0	104596	pUBC-YFP-mod0	FALSE
col_1_teb_4_LB_1_104596_pUBC-YFP-mod0	wt	6	145	1	TRUE	1:10549253	reverse	1	10549253	LB	LZ156_1	0		4	TTAA	-64	Col-0	104596	pUBC-YFP-mod0	FALSE
col_1_teb_4_LB_1_104596_pUBC-YFP-mod0	wt	3	238	1	TRUE	1:10561520	reverse	1	10561520	LB	LZ156_1	0		4	TGTC	-35	Col-0	104596	pUBC-YFP-mod0	FALSE
col_1_teb_4_LB_1_104596_pUBC-YFP-mod0	wt	11	413	0.909091	TRUE	1:10576460	forward	1	10576460	LB	LZ156_1	11	GTTACTATTTT	0		-50	Col-0	104596	pUBC-YFP-mod0	FALSE
col_1_teb_4_LB_1_104596_pUBC-YFP-mod0	wt	3	207	1	TRUE	1:10800544	reverse	1	10800544	LB	LZ156_1	0		4	TTTG	-21	Col-0	104596	pUBC-YFP-mod0	FALSE
col_1_teb_4_LB_1_104596_pUBC-YFP-mod0	wt	3	310	1	TRUE	1:11003294	forward	1	11003294	LB	LZ156_1	0		4	AAGT	-39	Col-0	104596	pUBC-YFP-mod0	FALSE
col_1_teb_4_LB_1_104596_pUBC-YFP-mod0	wt	8	468	0.888889	TRUE	1:11143803	forward	1	11143803	LB	LZ156_1	0		5	ATTAA	-64	Col-0	104596	pUBC-YFP-mod0	FALSE
col_1_teb_4_LB_1_104596_pUBC-YFP-mod0	wt	6	426	0.833333	TRUE	1:11198716	forward	1	11198716	LB	LZ156_1	0		2	AA	-25	Col-0	104596	pUBC-YFP-mod0	FALSE
col_1_teb_4_LB_1_104596_pUBC-YFP-mod0	wt	7	309	1	TRUE	1:11474066	reverse	1	11474066	LB	LZ156_1	1	A	0		-51	Col-0	104596	pUBC-YFP-mod0	FALSE
col_1_teb_4_LB_1_104596_pUBC-YFP-mod0	wt	12	375	0.833333	TRUE	1:13668771	reverse	1	13668771	LB	LZ156_1	0		2	GT	-39	Col-0	104596	pUBC-YFP-mod0	FALSE
col_1_teb_4_LB_1_104596_pUBC-YFP-mod0	wt	3	401	1	TRUE	1:14184178	reverse	1	14184178	LB	LZ156_1	6	TCGAGA	0		-33	Col-0	104596	pUBC-YFP-mod0	FALSE
col_1_teb_4_LB_1_104596_pUBC-YFP-mod0	wt	7	185	1	TRUE	1:16737728	forward	1	16737728	LB	LZ156_1	0		4	ATTA	-65	Col-0	104596	pUBC-YFP-mod0	FALSE
col_1_teb_4_LB_1_104596_pUBC-YFP-mod0	wt	4	308	0.857143	TRUE	1:18898642	reverse	1	18898642	LB	LZ156_1	0		6	TATTAA	-41	Col-0	104596	pUBC-YFP-mod0	FALSE
col_1_teb_4_LB_1_104596_pUBC-YFP-mod0	wt	33	542	0.939394	TRUE	1:19474761	forward	1	19474761	LB	LZ156_1	0		4	GTTA	-45	Col-0	104596	pUBC-YFP-mod0	FALSE
col_1_teb_4_LB_1_104596_pUBC-YFP-mod0	wt	13	299	0.769231	TRUE	1:19474792	reverse	1	19474792	LB	LZ156_1	0		5	TGTTT	-18	Col-0	104596	pUBC-YFP-mod0	FALSE
col_1_teb_4_LB_1_104596_pUBC-YFP-mod0	wt	21	481	0.952381	TRUE	1:19849068	reverse	1	19849068	LB	LZ156_1	4	TGAA	0		-46	Col-0	104596	pUBC-YFP-mod0	FALSE
col_1_teb_4_LB_1_104596_pUBC-YFP-mod0	wt	82	408	0.976471	TRUE	1:19854962	reverse	1	19854962	LB	LZ156_1	0		3	TTA	-45	Col-0	104596	pUBC-YFP-mod0	FALSE
col_1_teb_4_LB_1_104596_pUBC-YFP-mod0	wt	3	98	1	TRUE	1:20479933	reverse	1	20479933	LB	LZ156_1	0		5	TAAAA	-62	Col-0	104596	pUBC-YFP-mod0	FALSE
col_1_teb_4_LB_1_104596_pUBC-YFP-mod0	wt	3	218	1	TRUE	1:20839017	forward	1	20839017	LB	LZ156_1	36	ACATTGACGTCTGGAGAAACTTAATAACACATTGCG	0		-60	Col-0	104596	pUBC-YFP-mod0	FALSE
col_1_teb_4_LB_1_104596_pUBC-YFP-mod0	wt	3	208	1	TRUE	1:22151995	reverse	1	22151995	LB	LZ156_1	2	GG	0		-44	Col-0	104596	pUBC-YFP-mod0	FALSE
col_1_teb_4_LB_1_104596_pUBC-YFP-mod0	wt	3	386	1	TRUE	1:22773130	reverse	1	22773130	LB	LZ156_1	0		0		-24	Col-0	104596	pUBC-YFP-mod0	FALSE
col_1_teb_4_LB_1_104596_pUBC-YFP-mod0	wt	34	387	0.911765	TRUE	1:23267323	forward	1	23267323	LB	LZ156_1	0		0		-24	Col-0	104596	pUBC-YFP-mod0	FALSE
col_1_teb_4_LB_1_104596_pUBC-YFP-mod0	wt	5	289	0.8	TRUE	1:23375773	reverse	1	23375773	LB	LZ156_1	0		0		-38	Col-0	104596	pUBC-YFP-mod0	FALSE
col_1_teb_4_LB_1_104596_pUBC-YFP-mod0	wt	3	258	1	TRUE	1:23449677	reverse	1	23449677	LB	LZ156_1	0		4	TTTG	-21	Col-0	104596	pUBC-YFP-mod0	FALSE
col_1_teb_4_LB_1_104596_pUBC-YFP-mod0	wt	3	178	1	TRUE	1:24088852	reverse	1	24088852	LB	LZ156_1	6	ATTTTT	0		-38	Col-0	104596	pUBC-YFP-mod0	FALSE
col_1_teb_4_LB_1_104596_pUBC-YFP-mod0	wt	4	228	0.75	TRUE	1:25125292	forward	1	25125292	LB	LZ156_1	0		6	AAAAAC	-60	Col-0	104596	pUBC-YFP-mod0	FALSE
col_1_teb_4_LB_1_104596_pUBC-YFP-mod0	wt	4	178	1	TRUE	1:26364486	forward	1	26364486	LB	LZ156_1	0		2	AT	-44	Col-0	104596	pUBC-YFP-mod0	FALSE
col_1_teb_4_LB_1_104596_pUBC-YFP-mod0	wt	16	357	0.9375	TRUE	1:26541023	forward	1	26541023	LB	LZ156_1	0		2	CC	-56	Col-0	104596	pUBC-YFP-mod0	FALSE
col_1_teb_4_LB_1_104596_pUBC-YFP-mod0	wt	15	401	0.875	TRUE	1:26541098	reverse	1	26541098	LB	LZ156_1	0		5	TAAAA	-62	Col-0	104596	pUBC-YFP-mod0	FALSE
col_1_teb_4_LB_1_104596_pUBC-YFP-mod0	wt	4	182	0.75	TRUE	1:26618025	forward	1	26618025	LB	LZ156_1	0		4	CAAT	-24	Col-0	104596	pUBC-YFP-mod0	FALSE
col_1_teb_4_LB_1_104596_pUBC-YFP-mod0	wt	18	260	0.833333	TRUE	1:26811924	reverse	1	26811924	LB	LZ156_1	0		8	ATCTGTTT	-18	Col-0	104596	pUBC-YFP-mod0	FALSE
col_1_teb_4_LB_1_104596_pUBC-YFP-mod0	wt	3	329	1	TRUE	1:26950836	reverse	1	26950836	LB	LZ156_1	0		2	AT	-24	Col-0	104596	pUBC-YFP-mod0	FALSE
col_1_teb_4_LB_1_104596_pUBC-YFP-mod0	wt	6	372	1	TRUE	1:27097857	reverse	1	27097857	LB	LZ156_1	0		2	AA	-25	Col-0	104596	pUBC-YFP-mod0	FALSE
col_1_teb_4_LB_1_104596_pUBC-YFP-mod0	wt	15	360	0.866667	TRUE	1:27233118	reverse	1	27233118	LB	LZ156_1	0		2	TC	-35	Col-0	104596	pUBC-YFP-mod0	FALSE
col_1_teb_4_LB_1_104596_pUBC-YFP-mod0	wt	5	284	1	TRUE	1:28371052	forward	1	28371052	LB	LZ156_1	0		4	TTGT	-36	Col-0	104596	pUBC-YFP-mod0	FALSE
col_1_teb_4_LB_1_104596_pUBC-YFP-mod0	wt	43	422	0.930233	TRUE	1:28425094	reverse	1	28425094	LB	LZ156_1	0		3	AAG	-40	Col-0	104596	pUBC-YFP-mod0	FALSE
col_1_teb_4_LB_1_104596_pUBC-YFP-mod0	wt	14	657	0.928571	TRUE	1:28593307	reverse	1	28593307	LB	LZ156_1	0		3	ATT	-43	Col-0	104596	pUBC-YFP-mod0	FALSE
col_1_teb_4_LB_1_104596_pUBC-YFP-mod0	wt	14	616	1	TRUE	1:28612589	forward	1	28612589	LB	LZ156_1	0		2	GC	-30	Col-0	104596	pUBC-YFP-mod0	FALSE
col_1_teb_4_LB_1_104596_pUBC-YFP-mod0	wt	4	260	1	TRUE	1:28967800	forward	1	28967800	LB	LZ156_1	8	ACGCCTAA	0		-32	Col-0	104596	pUBC-YFP-mod0	FALSE
col_1_teb_4_LB_1_104596_pUBC-YFP-mod0	wt	4	332	1	TRUE	1:29035072	forward	1	29035072	LB	LZ156_1	0		0		-43	Col-0	104596	pUBC-YFP-mod0	FALSE
col_1_teb_4_LB_1_104596_pUBC-YFP-mod0	wt	5	238	0.8	TRUE	1:29196276	forward	1	29196276	LB	LZ156_1	0		4	AGCG	-29	Col-0	104596	pUBC-YFP-mod0	FALSE
col_1_teb_4_LB_1_104596_pUBC-YFP-mod0	wt	5	249	1	TRUE	1:29444262	reverse	1	29444262	LB	LZ156_1	0		6	GTTATT	-43	Col-0	104596	pUBC-YFP-mod0	FALSE
col_1_teb_4_LB_1_104596_pUBC-YFP-mod0	wt	22	348	0.913043	TRUE	1:29789305	forward	1	29789305	LB	LZ156_1	0		5	AAAAA	-61	Col-0	104596	pUBC-YFP-mod0	FALSE
col_1_teb_4_LB_1_104596_pUBC-YFP-mod0	wt	3	148	1	TRUE	1:30039225	forward	1	30039225	LB	LZ156_1	3	CTA	0		-25	Col-0	104596	pUBC-YFP-mod0	FALSE
col_1_teb_4_LB_1_104596_pUBC-YFP-mod0	wt	31	416	0.967742	TRUE	1:9739733	reverse	1	9739733	LB	LZ156_1	0		3	TTA	-17	Col-0	104596	pUBC-YFP-mod0	FALSE
col_1_teb_4_LB_1_104596_pUBC-YFP-mod0	wt	7	325	0.857143	TRUE	1:27221360	reverse	1	27221360	LB	LZ156_1	5	GTGTT	0		-24	Col-0	104596	pUBC-YFP-mod0	FALSE
col_1_teb_4_LB_1_104596_pUBC-YFP-mod0	wt	21	460	0.761905	TRUE	1:13670250	forward	1	13670250	LB	LZ156_1	18	TTGTCTAAGCGTCGGTGT	0		-8	Col-0	104596	pUBC-YFP-mod0	FALSE
col_1_teb_4_LB_1_104596_pUBC-YFP-mod0	wt	21	341	0.761905	TRUE	1:28460581	reverse	1	28460581	LB	LZ156_1	0		0		-15	Col-0	104596	pUBC-YFP-mod0	FALSE
col_1_teb_4_LB_1_104596_pUBC-YFP-mod0	wt	9	234	0.888889	TRUE	1:23941889	forward	1	23941889	LB	LZ156_1	0		3	ATA	-7	Col-0	104596	pUBC-YFP-mod0	FALSE
col_1_teb_4_LB_1_104596_pUBC-YFP-mod0	wt	4	164	1	TRUE	1:7620811	forward	1	7620811	LB	LZ156_1	0		0		-7	Col-0	104596	pUBC-YFP-mod0	FALSE
col_1_teb_4_LB_1_104596_pUBC-YFP-mod0	wt	44	575	0.909091	TRUE	1:23547881	reverse	1	23547881	LB	LZ156_1	0		4	ACCA	-12	Col-0	104596	pUBC-YFP-mod0	FALSE
col_1_teb_4_LB_1_104596_pUBC-YFP-mod0	wt	9	294	0.777778	TRUE	1:27161181	forward	1	27161181	LB	LZ156_1	0		5	GTTTA	-17	Col-0	104596	pUBC-YFP-mod0	FALSE
col_1_teb_4_LB_1_104596_pUBC-YFP-mod0	wt	9	326	1	TRUE	1:3241739	forward	1	3241739	LB	LZ156_1	0		6	TTACAC	-14	Col-0	104596	pUBC-YFP-mod0	FALSE
col_1_teb_4_LB_1_104596_pUBC-YFP-mod0	wt	3	284	1	TRUE	1:24076483	reverse	1	24076483	LB	LZ156_1	0		2	CA	-10	Col-0	104596	pUBC-YFP-mod0	FALSE
col_1_teb_4_LB_1_104596_pUBC-YFP-mod0	wt	6	356	1	TRUE	1:30173524	forward	1	30173524	LB	LZ156_1	12	ACACATTGCGGA	0		-7	Col-0	104596	pUBC-YFP-mod0	FALSE
col_1_teb_4_LB_1_104596_pUBC-YFP-mod0	wt	12	355	0.916667	TRUE	1:3367838	reverse	1	3367838	LB	LZ156_1	19	GATCACAGCTAAGCAGATC	0		-26	Col-0	104596	pUBC-YFP-mod0	FALSE
col_1_teb_4_LB_1_104596_pUBC-YFP-mod0	wt	14	475	0.785714	TRUE	1:302523	forward	1	302523	LB	LZ156_1	34	ATTTATGAGATGGGTTATTAAGTTGTCTAAGCTC	0		-19	Col-0	104596	pUBC-YFP-mod0	FALSE
col_1_teb_4_LB_1_104596_pUBC-YFP-mod0	wt	3	385	1	TRUE	1:3579421	forward	1	3579421	LB	LZ156_1	13	CTACGTGAAGAAG	0		-9	Col-0	104596	pUBC-YFP-mod0	FALSE
col_1_teb_4_LB_1_104596_pUBC-YFP-mod0	wt	4	362	1	TRUE	1:6974920	forward	1	6974920	LB	LZ156_1	27	TAATTCAGTACATTAAAAACGTCCGCT	0		-28	Col-0	104596	pUBC-YFP-mod0	FALSE
col_1_teb_4_LB_1_104596_pUBC-YFP-mod0	wt	24	536	0.916667	TRUE	1:8631342	forward	1	8631342	LB	LZ156_1	0		0		-17	Col-0	104596	pUBC-YFP-mod0	FALSE
col_1_teb_4_LB_1_104596_pUBC-YFP-mod0	wt	3	149	1	TRUE	1:1413944	forward	1	1413944	LB	LZ156_1	15	GCCAATATATCAATT	0		-13	Col-0	104596	pUBC-YFP-mod0	FALSE
col_1_teb_4_LB_1_104596_pUBC-YFP-mod0	wt	4	402	1	TRUE	1:6123627	reverse	1	6123627	LB	LZ156_1	0		6	ATATAT	-4	Col-0	104596	pUBC-YFP-mod0	FALSE
col_1_teb_4_LB_1_104596_pUBC-YFP-mod0	wt	4	338	0.75	TRUE	1:26329856	forward	1	26329856	LB	LZ156_1	22	TCTTTGATTACACCACAATTTG	0		0	Col-0	104596	pUBC-YFP-mod0	FALSE
col_1_teb_4_LB_1_104596_pUBC-YFP-mod0	wt	4	400	1	TRUE	1:4909647	reverse	1	4909647	LB	LZ156_1	0		2	GT	-20	Col-0	104596	pUBC-YFP-mod0	FALSE
col_1_teb_4_LB_1_104596_pUBC-YFP-mod0	wt	5	291	0.8	TRUE	1:1055596	forward	1	1055596	LB	LZ156_1	2	TA	0		0	Col-0	104596	pUBC-YFP-mod0	FALSE
col_1_teb_4_LB_1_104596_pUBC-YFP-mod0	wt	13	464	1	TRUE	1:271651	reverse	1	271651	LB	LZ156_1	0		2	AC	-14	Col-0	104596	pUBC-YFP-mod0	FALSE
col_1_teb_4_LB_1_104596_pUBC-YFP-mod0	wt	3	97	1	TRUE	1:9324429	reverse	1	9324429	LB	LZ156_1	24	CGCTGCGTTGTCTAAGCGTCAATA	0		-11	Col-0	104596	pUBC-YFP-mod0	FALSE
col_1_teb_4_LB_1_104596_pUBC-YFP-mod0	wt	3	282	1	TRUE	1:11002372	forward	1	11002372	LB	LZ156_1	9	ATTTAATTC	0		-5	Col-0	104596	pUBC-YFP-mod0	FALSE
col_1_teb_4_LB_1_104596_pUBC-YFP-mod0	wt	4	204	1	TRUE	1:26836748	reverse	1	26836748	LB	LZ156_1	2	CG	0		-11	Col-0	104596	pUBC-YFP-mod0	FALSE
col_1_teb_4_LB_1_104596_pUBC-YFP-mod0	wt	3	230	1	TRUE	1:29346523	forward	1	29346523	LB	LZ156_1	0		5	TCCTG	0	Col-0	104596	pUBC-YFP-mod0	FALSE
col_1_teb_4_LB_1_104596_pUBC-YFP-mod0	wt	3	328	1	TRUE	1:23152225	forward	1	23152225	LB	LZ156_1	0		2	TC	-3	Col-0	104596	pUBC-YFP-mod0	FALSE
col_1_teb_4_LB_1_104596_pUBC-YFP-mod0	wt	5	464	1	TRUE	1:29903434	reverse	1	29903434	LB	LZ156_1	36	ACTCTTTTCTCTTAGGTTTACCCCCCACCACAATAA	0		-32	Col-0	104596	pUBC-YFP-mod0	FALSE
col_1_teb_4_LB_1_104596_pUBC-YFP-mod0	wt	6	336	0.833333	TRUE	1:28860715	forward	1	28860715	LB	LZ156_1	1	A	0		-3	Col-0	104596	pUBC-YFP-mod0	FALSE
col_1_teb_4_LB_1_104596_pUBC-YFP-mod0	wt	13	367	0.923077	TRUE	1:7500449	forward	1	7500449	LB	LZ156_1	30	AAAGTCCCCCATTGGCGTTAATTCGTCAAG	0		-22	Col-0	104596	pUBC-YFP-mod0	FALSE
col_1_teb_4_LB_1_104596_pUBC-YFP-mod0	wt	3	355	1	TRUE	1:22164039	reverse	1	22164039	LB	LZ156_1	1	A	0		-20	Col-0	104596	pUBC-YFP-mod0	FALSE
col_1_teb_4_LB_1_104596_pUBC-YFP-mod0	wt	5	428	0.8	TRUE	1:27664213	reverse	1	27664213	LB	LZ156_1	2	AA	0		-7	Col-0	104596	pUBC-YFP-mod0	FALSE
col_1_teb_4_LB_1_104596_pUBC-YFP-mod0	wt	4	179	0.75	TRUE	1:26364663	reverse	1	26364663	LB	LZ156_1	3	ACT	0		-21	Col-0	104596	pUBC-YFP-mod0	FALSE
col_1_teb_4_LB_1_104596_pUBC-YFP-mod0	wt	4	414	0.75	TRUE	1:4459391	reverse	1	4459391	LB	LZ156_1	0		2	CA	-15	Col-0	104596	pUBC-YFP-mod0	FALSE
col_1_teb_4_LB_1_104596_pUBC-YFP-mod0	wt	3	231	1	TRUE	1:1894395	forward	1	1894395	LB	LZ156_1	0		3	AAT	-8	Col-0	104596	pUBC-YFP-mod0	FALSE
col_1_teb_4_LB_1_104596_pUBC-YFP-mod0	wt	3	239	1	TRUE	1:9062946	forward	1	9062946	LB	LZ156_1	41	ACGTTGATAGTGTAATATAGCCGTTCTTCCGAATAGCATCG	0		-32	Col-0	104596	pUBC-YFP-mod0	FALSE
col_1_teb_4_LB_1_104596_pUBC-YFP-mod0	wt	9	257	1	TRUE	1:7700055	reverse	1	7700055	LB	LZ156_1	0		1	T	-20	Col-0	104596	pUBC-YFP-mod0	FALSE
col_1_teb_4_LB_1_104596_pUBC-YFP-mod0	wt	3	160	1	TRUE	1:16043949	reverse	1	16043949	LB	LZ156_1	0		7	ATATCCT	-1	Col-0	104596	pUBC-YFP-mod0	FALSE
col_1_teb_4_LB_1_104596_pUBC-YFP-mod0	wt	4	383	0.75	TRUE	1:29899076	reverse	1	29899076	LB	LZ156_1	0		4	CCAC	-11	Col-0	104596	pUBC-YFP-mod0	FALSE
col_1_teb_4_LB_1_104596_pUBC-YFP-mod0	wt	3	298	1	TRUE	1:7955791	reverse	1	7955791	LB	LZ156_1	0		4	CCTG	0	Col-0	104596	pUBC-YFP-mod0	FALSE
col_1_teb_4_LB_1_104596_pUBC-YFP-mod0	wt	8	328	1	TRUE	1:7835394	reverse	1	7835394	LB	LZ156_1	0		4	TTGT	-20	Col-0	104596	pUBC-YFP-mod0	FALSE
col_1_teb_4_LB_1_104596_pUBC-YFP-mod0	wt	5	291	0.8	TRUE	1:26769798	forward	1	26769798	LB	LZ156_1	0		3	TTG	-21	Col-0	104596	pUBC-YFP-mod0	FALSE
col_1_teb_4_LB_1_104596_pUBC-YFP-mod0	wt	4	257	1	TRUE	1:8026585	forward	1	8026585	LB	LZ156_1	0		3	ACA	-10	Col-0	104596	pUBC-YFP-mod0	FALSE
col_1_teb_4_LB_1_104596_pUBC-YFP-mod0	wt	3	485	1	TRUE	1:10995853	reverse	1	10995853	LB	LZ156_1	0		3	TTG	-21	Col-0	104596	pUBC-YFP-mod0	FALSE
col_1_teb_4_LB_1_104596_pUBC-YFP-mod0	wt	5	211	1	TRUE	1:4692529	forward	1	4692529	LB	LZ156_1	1	T	0		-8	Col-0	104596	pUBC-YFP-mod0	FALSE
col_1_teb_4_LB_1_104596_pUBC-YFP-mod0	wt	6	218	0.833333	TRUE	1:26555263	forward	1	26555263	LB	LZ156_1	24	ATCTATGTTATTAAGTTGTCTAAG	0		-30	Col-0	104596	pUBC-YFP-mod0	FALSE
col_1_teb_4_LB_1_104596_pUBC-YFP-mod0	wt	3	387	1	TRUE	1:28065271	reverse	1	28065271	LB	LZ156_1	0		3	ATC	-3	Col-0	104596	pUBC-YFP-mod0	FALSE
col_1_teb_4_LB_1_104596_pUBC-YFP-mod0	wt	8	203	0.875	TRUE	1:22810341	forward	1	22810341	LB	LZ156_1	0		1	A	-7	Col-0	104596	pUBC-YFP-mod0	FALSE
col_1_teb_4_LB_1_104596_pUBC-YFP-mod0	wt	4	402	1	TRUE	1:3440021	forward	1	3440021	LB	LZ156_1	22	AGCATATTCACTCTCAAGTTGT	0		-7	Col-0	104596	pUBC-YFP-mod0	FALSE
col_1_teb_4_LB_1_104596_pUBC-YFP-mod0	wt	6	509	0.833333	TRUE	1:5786316	forward	1	5786316	LB	LZ156_1	0		0		0	Col-0	104596	pUBC-YFP-mod0	FALSE
col_1_teb_4_LB_1_104596_pUBC-YFP-mod0	wt	3	385	1	TRUE	1:5758681	forward	1	5758681	LB	LZ156_1	27	CGGCGTTAATTCAGTACATTAATTCAA	0		-34	Col-0	104596	pUBC-YFP-mod0	FALSE
col_1_teb_4_LB_1_104596_pUBC-YFP-mod0	wt	5	332	1	TRUE	1:1497392	forward	1	1497392	LB	LZ156_1	0		4	ACAC	-14	Col-0	104596	pUBC-YFP-mod0	FALSE
col_1_teb_4_LB_1_104596_pUBC-YFP-mod0	wt	9	343	1	TRUE	1:3875837	reverse	1	3875837	LB	LZ156_1	3	TTT	0		-15	Col-0	104596	pUBC-YFP-mod0	FALSE
col_1_teb_4_LB_1_104596_pUBC-YFP-mod0	wt	6	341	1	TRUE	1:868947	reverse	1	868947	LB	LZ156_1	0		2	AA	-9	Col-0	104596	pUBC-YFP-mod0	FALSE
col_1_teb_4_LB_1_104596_pUBC-YFP-mod0	wt	3	287	1	TRUE	1:28575251	reverse	1	28575251	LB	LZ156_1	7	GTGTTAT	0		-24	Col-0	104596	pUBC-YFP-mod0	FALSE
col_1_teb_4_LB_1_104596_pUBC-YFP-mod0	wt	5	418	1	TRUE	1:3370424	reverse	1	3370424	LB	LZ156_1	0		3	TTG	-21	Col-0	104596	pUBC-YFP-mod0	FALSE
col_1_teb_4_LB_1_104596_pUBC-YFP-mod0	wt	5	367	1	TRUE	1:10541332	forward	1	10541332	LB	LZ156_1	18	TTGGTCAGCAGATTTTGC	0		0	Col-0	104596	pUBC-YFP-mod0	FALSE
col_1_teb_4_LB_1_104596_pUBC-YFP-mod0	wt	5	317	0.8	TRUE	1:9394883	forward	1	9394883	LB	LZ156_1	0		0		-6	Col-0	104596	pUBC-YFP-mod0	FALSE
col_1_teb_4_LB_1_104596_pUBC-YFP-mod0	wt	3	332	1	TRUE	1:5230459	forward	1	5230459	LB	LZ156_1	0		0		-21	Col-0	104596	pUBC-YFP-mod0	FALSE
col_1_teb_4_LB_1_104596_pUBC-YFP-mod0	wt	3	343	1	TRUE	1:10762622	reverse	1	10762622	LB	LZ156_1	0		2	AT	-4	Col-0	104596	pUBC-YFP-mod0	FALSE
col_1_teb_4_LB_1_104596_pUBC-YFP-mod0	wt	4	249	1	TRUE	1:22672846	forward	1	22672846	LB	LZ156_1	5	GTGTT	0		-10	Col-0	104596	pUBC-YFP-mod0	FALSE
col_1_teb_4_LB_1_104596_pUBC-YFP-mod0	wt	3	162	1	TRUE	1:29224212	forward	1	29224212	LB	LZ156_1	0		4	TTGT	-20	Col-0	104596	pUBC-YFP-mod0	FALSE
col_1_teb_4_LB_1_104596_pUBC-YFP-mod0	wt	4	174	1	TRUE	1:1281644	forward	1	1281644	LB	LZ156_1	0		5	CACAA	-9	Col-0	104596	pUBC-YFP-mod0	FALSE
col_1_teb_4_LB_1_104596_pUBC-YFP-mod0	wt	17	292	1	TRUE	2:347352	reverse	2	347352	LB	LZ156_1	0		5	GTTAT	-44	Col-0	104596	pUBC-YFP-mod0	FALSE
col_1_teb_4_LB_1_104596_pUBC-YFP-mod0	wt	4	228	0.75	TRUE	2:544442	reverse	2	544442	LB	LZ156_1	19	CGCAATGTGTTATTAATAA	0		-35	Col-0	104596	pUBC-YFP-mod0	FALSE
col_1_teb_4_LB_1_104596_pUBC-YFP-mod0	wt	4	327	1	TRUE	2:867886	reverse	2	867886	LB	LZ156_1	0		2	GT	-49	Col-0	104596	pUBC-YFP-mod0	FALSE
col_1_teb_4_LB_1_104596_pUBC-YFP-mod0	wt	6	381	1	TRUE	2:1195372	forward	2	1195372	LB	LZ156_1	2	AA	0		-25	Col-0	104596	pUBC-YFP-mod0	FALSE
col_1_teb_4_LB_1_104596_pUBC-YFP-mod0	wt	5	131	1	TRUE	2:1197400	reverse	2	1197400	LB	LZ156_1	0		3	TTT	-22	Col-0	104596	pUBC-YFP-mod0	FALSE
col_1_teb_4_LB_1_104596_pUBC-YFP-mod0	wt	4	518	1	TRUE	2:2765610	reverse	2	2765610	LB	LZ156_1	0		4	CTAA	-32	Col-0	104596	pUBC-YFP-mod0	FALSE
col_1_teb_4_LB_1_104596_pUBC-YFP-mod0	wt	34	452	0.875	TRUE	2:3057805	forward	2	3057805	LB	LZ156_1	0		7	CAAAAAC	-60	Col-0	104596	pUBC-YFP-mod0	FALSE
col_1_teb_4_LB_1_104596_pUBC-YFP-mod0	wt	7	281	0.857143	TRUE	2:5916773	reverse	2	5916773	LB	LZ156_1	0		5	CAATT	-23	Col-0	104596	pUBC-YFP-mod0	FALSE
col_1_teb_4_LB_1_104596_pUBC-YFP-mod0	wt	4	180	1	TRUE	2:6788061	reverse	2	6788061	LB	LZ156_1	0		4	TACA	-68	Col-0	104596	pUBC-YFP-mod0	FALSE
col_1_teb_4_LB_1_104596_pUBC-YFP-mod0	wt	3	248	1	TRUE	2:7392496	reverse	2	7392496	LB	LZ156_1	0		4	TACA	-68	Col-0	104596	pUBC-YFP-mod0	FALSE
col_1_teb_4_LB_1_104596_pUBC-YFP-mod0	wt	4	324	1	TRUE	2:7604425	reverse	2	7604425	LB	LZ156_1	0		2	CG	-29	Col-0	104596	pUBC-YFP-mod0	FALSE
col_1_teb_4_LB_1_104596_pUBC-YFP-mod0	wt	3	290	1	TRUE	2:8502381	forward	2	8502381	LB	LZ156_1	0		0		-44	Col-0	104596	pUBC-YFP-mod0	FALSE
col_1_teb_4_LB_1_104596_pUBC-YFP-mod0	wt	3	112	1	TRUE	2:8715956	forward	2	8715956	LB	LZ156_1	0		3	ATT	-23	Col-0	104596	pUBC-YFP-mod0	FALSE
col_1_teb_4_LB_1_104596_pUBC-YFP-mod0	wt	3	246	1	TRUE	2:9918714	reverse	2	9918714	LB	LZ156_1	10	TAACACAACT	0		-41	Col-0	104596	pUBC-YFP-mod0	FALSE
col_1_teb_4_LB_1_104596_pUBC-YFP-mod0	wt	4	298	1	TRUE	2:10023048	reverse	2	10023048	LB	LZ156_1	3	ACA	0		-49	Col-0	104596	pUBC-YFP-mod0	FALSE
col_1_teb_4_LB_1_104596_pUBC-YFP-mod0	wt	4	128	1	TRUE	2:10428151	reverse	2	10428151	LB	LZ156_1	0		3	TTT	-22	Col-0	104596	pUBC-YFP-mod0	FALSE
col_1_teb_4_LB_1_104596_pUBC-YFP-mod0	wt	4	261	0.75	TRUE	2:11963412	reverse	2	11963412	LB	LZ156_1	0		3	ATG	-50	Col-0	104596	pUBC-YFP-mod0	FALSE
col_1_teb_4_LB_1_104596_pUBC-YFP-mod0	wt	8	212	0.75	TRUE	2:12094716	reverse	2	12094716	LB	LZ156_1	0		1	T	-49	Col-0	104596	pUBC-YFP-mod0	FALSE
col_1_teb_4_LB_1_104596_pUBC-YFP-mod0	wt	5	313	1	TRUE	2:13781435	forward	2	13781435	LB	LZ156_1	0		2	TA	-45	Col-0	104596	pUBC-YFP-mod0	FALSE
col_1_teb_4_LB_1_104596_pUBC-YFP-mod0	wt	3	276	1	TRUE	2:14210572	forward	2	14210572	LB	LZ156_1	0		3	TAT	-44	Col-0	104596	pUBC-YFP-mod0	FALSE
col_1_teb_4_LB_1_104596_pUBC-YFP-mod0	wt	3	262	1	TRUE	2:14424577	reverse	2	14424577	LB	LZ156_1	18	TGTGTTATTAGGGTTTCA	0		-32	Col-0	104596	pUBC-YFP-mod0	FALSE
col_1_teb_4_LB_1_104596_pUBC-YFP-mod0	wt	14	292	0.857143	TRUE	2:14483260	reverse	2	14483260	LB	LZ156_1	0		2	GT	-36	Col-0	104596	pUBC-YFP-mod0	FALSE
col_1_teb_4_LB_1_104596_pUBC-YFP-mod0	wt	4	660	1	TRUE	2:14577703	forward	2	14577703	LB	LZ156_1	0		4	GTCT	-34	Col-0	104596	pUBC-YFP-mod0	FALSE
col_1_teb_4_LB_1_104596_pUBC-YFP-mod0	wt	4	264	0.75	TRUE	2:14994510	forward	2	14994510	LB	LZ156_1	4	CCAA	0		-32	Col-0	104596	pUBC-YFP-mod0	FALSE
col_1_teb_4_LB_1_104596_pUBC-YFP-mod0	wt	6	316	0.833333	TRUE	2:15102213	forward	2	15102213	LB	LZ156_1	0		1	A	-32	Col-0	104596	pUBC-YFP-mod0	FALSE
col_1_teb_4_LB_1_104596_pUBC-YFP-mod0	wt	3	185	1	TRUE	2:15188591	forward	2	15188591	LB	LZ156_1	0		2	AA	-25	Col-0	104596	pUBC-YFP-mod0	FALSE
col_1_teb_4_LB_1_104596_pUBC-YFP-mod0	wt	59	594	0.932203	TRUE	2:15208616	reverse	2	15208616	LB	LZ156_1	0		9	TGTCTAAGC	-30	Col-0	104596	pUBC-YFP-mod0	FALSE
col_1_teb_4_LB_1_104596_pUBC-YFP-mod0	wt	6	393	1	TRUE	2:15286144	reverse	2	15286144	LB	LZ156_1	0		4	CTAA	-32	Col-0	104596	pUBC-YFP-mod0	FALSE
col_1_teb_4_LB_1_104596_pUBC-YFP-mod0	wt	4	213	1	TRUE	2:15559756	forward	2	15559756	LB	LZ156_1	1	G	0		-24	Col-0	104596	pUBC-YFP-mod0	FALSE
col_1_teb_4_LB_1_104596_pUBC-YFP-mod0	wt	10	361	1	TRUE	2:16053258	reverse	2	16053258	LB	LZ156_1	0		2	TC	-35	Col-0	104596	pUBC-YFP-mod0	FALSE
col_1_teb_4_LB_1_104596_pUBC-YFP-mod0	wt	164	684	0.964286	TRUE	2:16119227	forward	2	16119227	LB	LZ156_1	5	CCTAG	0		-50	Col-0	104596	pUBC-YFP-mod0	FALSE
col_1_teb_4_LB_1_104596_pUBC-YFP-mod0	wt	8	315	1	TRUE	2:17792946	forward	2	17792946	LB	LZ156_1	12	CAATGGTAATCA	0		-62	Col-0	104596	pUBC-YFP-mod0	FALSE
col_1_teb_4_LB_1_104596_pUBC-YFP-mod0	wt	6	255	0.833333	TRUE	2:17828607	forward	2	17828607	LB	LZ156_1	0		3	CAA	-25	Col-0	104596	pUBC-YFP-mod0	FALSE
col_1_teb_4_LB_1_104596_pUBC-YFP-mod0	wt	3	298	1	TRUE	2:18107551	reverse	2	18107551	LB	LZ156_1	0		2	TG	-48	Col-0	104596	pUBC-YFP-mod0	FALSE
col_1_teb_4_LB_1_104596_pUBC-YFP-mod0	wt	11	433	1	TRUE	2:18160469	reverse	2	18160469	LB	LZ156_1	0		1	C	-30	Col-0	104596	pUBC-YFP-mod0	FALSE
col_1_teb_4_LB_1_104596_pUBC-YFP-mod0	wt	7	166	0.857143	TRUE	2:18321056	forward	2	18321056	LB	LZ156_1	4	CGGC	0		-23	Col-0	104596	pUBC-YFP-mod0	FALSE
col_1_teb_4_LB_1_104596_pUBC-YFP-mod0	wt	4	287	1	TRUE	2:18438225	forward	2	18438225	LB	LZ156_1	0		0		-64	Col-0	104596	pUBC-YFP-mod0	FALSE
col_1_teb_4_LB_1_104596_pUBC-YFP-mod0	wt	6	528	1	TRUE	2:18438246	reverse	2	18438246	LB	LZ156_1	0		5	ACGTC	-57	Col-0	104596	pUBC-YFP-mod0	FALSE
col_1_teb_4_LB_1_104596_pUBC-YFP-mod0	wt	6	297	0.833333	TRUE	2:18628315	forward	2	18628315	LB	LZ156_1	0		1	T	-24	Col-0	104596	pUBC-YFP-mod0	FALSE
col_1_teb_4_LB_1_104596_pUBC-YFP-mod0	wt	16	458	0.875	TRUE	2:18628349	reverse	2	18628349	LB	LZ156_1	0		6	TAAGTT	-38	Col-0	104596	pUBC-YFP-mod0	FALSE
col_1_teb_4_LB_1_104596_pUBC-YFP-mod0	wt	7	545	1	TRUE	2:18641615	reverse	2	18641615	LB	LZ156_1	0		2	TC	-35	Col-0	104596	pUBC-YFP-mod0	FALSE
col_1_teb_4_LB_1_104596_pUBC-YFP-mod0	wt	6	243	1	TRUE	2:19282592	reverse	2	19282592	LB	LZ156_1	0		5	AAAAC	-60	Col-0	104596	pUBC-YFP-mod0	FALSE
col_1_teb_4_LB_1_104596_pUBC-YFP-mod0	wt	3	176	1	TRUE	2:19569733	forward	2	19569733	LB	LZ156_1	0		1	C	-60	Col-0	104596	pUBC-YFP-mod0	FALSE
col_1_teb_4_LB_1_104596_pUBC-YFP-mod0	wt	14	533	1	TRUE	2:17808166	reverse	2	17808166	LB	LZ156_1	0		3	CCA	-12	Col-0	104596	pUBC-YFP-mod0	FALSE
col_1_teb_4_LB_1_104596_pUBC-YFP-mod0	wt	4	261	1	TRUE	2:9568601	forward	2	9568601	LB	LZ156_1	7	GTTGTCT	0		-25	Col-0	104596	pUBC-YFP-mod0	FALSE
col_1_teb_4_LB_1_104596_pUBC-YFP-mod0	wt	6	393	1	TRUE	2:17827024	reverse	2	17827024	LB	LZ156_1	14	GCAATTTGTTATTA	0		-13	Col-0	104596	pUBC-YFP-mod0	FALSE
col_1_teb_4_LB_1_104596_pUBC-YFP-mod0	wt	13	472	0.846154	TRUE	2:10686269	reverse	2	10686269	LB	LZ156_1	3	ATG	0		0	Col-0	104596	pUBC-YFP-mod0	FALSE
col_1_teb_4_LB_1_104596_pUBC-YFP-mod0	wt	15	482	0.8	TRUE	2:19145735	forward	2	19145735	LB	LZ156_1	9	GTGTTAATT	0		-8	Col-0	104596	pUBC-YFP-mod0	FALSE
col_1_teb_4_LB_1_104596_pUBC-YFP-mod0	wt	5	344	0.8	TRUE	2:9922228	reverse	2	9922228	LB	LZ156_1	17	TCCCTGGAGGCACAGGG	0		-31	Col-0	104596	pUBC-YFP-mod0	FALSE
col_1_teb_4_LB_1_104596_pUBC-YFP-mod0	wt	4	318	0.75	TRUE	2:11503798	reverse	2	11503798	LB	LZ156_1	23	TTGTTTACACCACAACTCAATTT	0		-8	Col-0	104596	pUBC-YFP-mod0	FALSE
col_1_teb_4_LB_1_104596_pUBC-YFP-mod0	wt	4	211	0.75	TRUE	2:9290339	forward	2	9290339	LB	LZ156_1	16	ACTGAATTCAGAAGAC	0		-4	Col-0	104596	pUBC-YFP-mod0	FALSE
col_1_teb_4_LB_1_104596_pUBC-YFP-mod0	wt	40	488	0.75	TRUE	2:17660879	forward	2	17660879	LB	LZ156_1	3	TTA	0		-11	Col-0	104596	pUBC-YFP-mod0	FALSE
col_1_teb_4_LB_1_104596_pUBC-YFP-mod0	wt	5	326	1	TRUE	2:17494227	forward	2	17494227	LB	LZ156_1	8	TGGATGTC	0		0	Col-0	104596	pUBC-YFP-mod0	FALSE
col_1_teb_4_LB_1_104596_pUBC-YFP-mod0	wt	6	336	0.833333	TRUE	2:15746385	forward	2	15746385	LB	LZ156_1	0		0		-20	Col-0	104596	pUBC-YFP-mod0	FALSE
col_1_teb_4_LB_1_104596_pUBC-YFP-mod0	wt	7	366	0.857143	TRUE	2:5584377	reverse	2	5584377	LB	LZ156_1	0		1	A	-9	Col-0	104596	pUBC-YFP-mod0	FALSE
col_1_teb_4_LB_1_104596_pUBC-YFP-mod0	wt	8	199	0.875	TRUE	2:18928414	reverse	2	18928414	LB	LZ156_1	13	ACGCAATGTGTTA	0		-7	Col-0	104596	pUBC-YFP-mod0	FALSE
col_1_teb_4_LB_1_104596_pUBC-YFP-mod0	wt	12	495	1	TRUE	2:17965421	forward	2	17965421	LB	LZ156_1	0		5	CACAA	-9	Col-0	104596	pUBC-YFP-mod0	FALSE
col_1_teb_4_LB_1_104596_pUBC-YFP-mod0	wt	8	291	0.875	TRUE	2:850416	forward	2	850416	LB	LZ156_1	2	TA	0		-10	Col-0	104596	pUBC-YFP-mod0	FALSE
col_1_teb_4_LB_1_104596_pUBC-YFP-mod0	wt	3	327	1	TRUE	2:19265215	forward	2	19265215	LB	LZ156_1	0		4	TATC	-3	Col-0	104596	pUBC-YFP-mod0	FALSE
col_1_teb_4_LB_1_104596_pUBC-YFP-mod0	wt	7	361	0.857143	TRUE	2:85199	forward	2	85199	LB	LZ156_1	3	GCT	0		-12	Col-0	104596	pUBC-YFP-mod0	FALSE
col_1_teb_4_LB_1_104596_pUBC-YFP-mod0	wt	5	245	0.8	TRUE	2:18928383	forward	2	18928383	LB	LZ156_1	11	CAGTGGCTCCT	0		-16	Col-0	104596	pUBC-YFP-mod0	FALSE
col_1_teb_4_LB_1_104596_pUBC-YFP-mod0	wt	8	357	1	TRUE	2:9290347	reverse	2	9290347	LB	LZ156_1	0		3	TTG	-21	Col-0	104596	pUBC-YFP-mod0	FALSE
col_1_teb_4_LB_1_104596_pUBC-YFP-mod0	wt	10	389	0.8	TRUE	2:18009763	forward	2	18009763	LB	LZ156_1	1	A	0		-15	Col-0	104596	pUBC-YFP-mod0	FALSE
col_1_teb_4_LB_1_104596_pUBC-YFP-mod0	wt	4	316	0.75	TRUE	2:16771930	reverse	2	16771930	LB	LZ156_1	40	AATATTCTTTTTATAATATTCTTTTTATAAACGCCCGTCA	0		-31	Col-0	104596	pUBC-YFP-mod0	FALSE
col_1_teb_4_LB_1_104596_pUBC-YFP-mod0	wt	6	384	1	TRUE	2:17941588	reverse	2	17941588	LB	LZ156_1	0		1	A	-9	Col-0	104596	pUBC-YFP-mod0	FALSE
col_1_teb_4_LB_1_104596_pUBC-YFP-mod0	wt	7	367	1	TRUE	2:584129	reverse	2	584129	LB	LZ156_1	0		2	TG	0	Col-0	104596	pUBC-YFP-mod0	FALSE
col_1_teb_4_LB_1_104596_pUBC-YFP-mod0	wt	7	277	0.857143	TRUE	2:17495134	forward	2	17495134	LB	LZ156_1	37	AAACTATCAGATTGTTCTTGAGGTGGTCAAATTAGTT	0		-19	Col-0	104596	pUBC-YFP-mod0	FALSE
col_1_teb_4_LB_1_104596_pUBC-YFP-mod0	wt	3	350	1	TRUE	2:18537942	reverse	2	18537942	LB	LZ156_1	11	ATTAATTCAGT	0		-22	Col-0	104596	pUBC-YFP-mod0	FALSE
col_1_teb_4_LB_1_104596_pUBC-YFP-mod0	wt	9	423	0.777778	TRUE	2:16184479	forward	2	16184479	LB	LZ156_1	3	GCA	0		-9	Col-0	104596	pUBC-YFP-mod0	FALSE
col_1_teb_4_LB_1_104596_pUBC-YFP-mod0	wt	7	286	0.857143	TRUE	2:18537969	reverse	2	18537969	LB	LZ156_1	25	TATCCAGGATATATTGTGGTGTAAA	0		-17	Col-0	104596	pUBC-YFP-mod0	FALSE
col_1_teb_4_LB_1_104596_pUBC-YFP-mod0	wt	7	260	1	TRUE	2:16165707	forward	2	16165707	LB	LZ156_1	12	ATGTATGTGTGT	0		-23	Col-0	104596	pUBC-YFP-mod0	FALSE
col_1_teb_4_LB_1_104596_pUBC-YFP-mod0	wt	3	307	1	TRUE	2:17941575	forward	2	17941575	LB	LZ156_1	0		0		-5	Col-0	104596	pUBC-YFP-mod0	FALSE
col_1_teb_4_LB_1_104596_pUBC-YFP-mod0	wt	5	233	1	TRUE	2:17828676	reverse	2	17828676	LB	LZ156_1	0		6	CGTTTA	-17	Col-0	104596	pUBC-YFP-mod0	FALSE
col_1_teb_4_LB_1_104596_pUBC-YFP-mod0	wt	3	353	1	TRUE	2:1912709	forward	2	1912709	LB	LZ156_1	4	ATTT	0		1	Col-0	104596	pUBC-YFP-mod0	FALSE
col_1_teb_4_LB_1_104596_pUBC-YFP-mod0	wt	3	268	1	TRUE	2:18584663	forward	2	18584663	LB	LZ156_1	0		2	AC	-16	Col-0	104596	pUBC-YFP-mod0	FALSE
col_1_teb_4_LB_1_104596_pUBC-YFP-mod0	wt	7	233	1	TRUE	2:477880	forward	2	477880	LB	LZ156_1	0		0		-13	Col-0	104596	pUBC-YFP-mod0	FALSE
col_1_teb_4_LB_1_104596_pUBC-YFP-mod0	wt	4	263	1	TRUE	2:5003497	forward	2	5003497	LB	LZ156_1	0		8	AATTTGTT	-19	Col-0	104596	pUBC-YFP-mod0	FALSE
col_1_teb_4_LB_1_104596_pUBC-YFP-mod0	wt	9	424	0.888889	TRUE	2:16847179	forward	2	16847179	LB	LZ156_1	0		4	ACAA	-9	Col-0	104596	pUBC-YFP-mod0	FALSE
col_1_teb_4_LB_1_104596_pUBC-YFP-mod0	wt	4	381	0.75	TRUE	2:14753931	forward	2	14753931	LB	LZ156_1	26	GTGTTATTAAGTTGTCCGCAATAGTA	0		-8	Col-0	104596	pUBC-YFP-mod0	FALSE
col_1_teb_4_LB_1_104596_pUBC-YFP-mod0	wt	4	272	1	TRUE	2:10547015	reverse	2	10547015	LB	LZ156_1	0		2	TA	-7	Col-0	104596	pUBC-YFP-mod0	FALSE
col_1_teb_4_LB_1_104596_pUBC-YFP-mod0	wt	6	519	1	TRUE	2:12152487	reverse	2	12152487	LB	LZ156_1	4	TACA	0		-10	Col-0	104596	pUBC-YFP-mod0	FALSE
col_1_teb_4_LB_1_104596_pUBC-YFP-mod0	wt	3	154	1	TRUE	2:13490880	forward	2	13490880	LB	LZ156_1	0		3	CAA	-9	Col-0	104596	pUBC-YFP-mod0	FALSE
col_1_teb_4_LB_1_104596_pUBC-YFP-mod0	wt	6	424	0.833333	TRUE	2:15768191	reverse	2	15768191	LB	LZ156_1	0		3	CAC	-11	Col-0	104596	pUBC-YFP-mod0	FALSE
col_1_teb_4_LB_1_104596_pUBC-YFP-mod0	wt	4	364	1	TRUE	2:477920	reverse	2	477920	LB	LZ156_1	0		0		-22	Col-0	104596	pUBC-YFP-mod0	FALSE
col_1_teb_4_LB_1_104596_pUBC-YFP-mod0	wt	4	235	0.75	TRUE	2:834821	forward	2	834821	LB	LZ156_1	26	TCAATTTGTTTAAACTATCAGCTGAT	0		-13	Col-0	104596	pUBC-YFP-mod0	FALSE
col_1_teb_4_LB_1_104596_pUBC-YFP-mod0	wt	4	454	0.75	TRUE	2:17960762	reverse	2	17960762	LB	LZ156_1	5	ATTAA	0		-19	Col-0	104596	pUBC-YFP-mod0	FALSE
col_1_teb_4_LB_1_104596_pUBC-YFP-mod0	wt	3	311	1	TRUE	2:18888804	forward	2	18888804	LB	LZ156_1	0		0		-21	Col-0	104596	pUBC-YFP-mod0	FALSE
col_1_teb_4_LB_1_104596_pUBC-YFP-mod0	wt	3	251	1	TRUE	2:1501223	reverse	2	1501223	LB	LZ156_1	0		4	CACC	-13	Col-0	104596	pUBC-YFP-mod0	FALSE
col_1_teb_4_LB_1_104596_pUBC-YFP-mod0	wt	5	325	1	TRUE	2:10264601	forward	2	10264601	LB	LZ156_1	5	CTAGA	0		-8	Col-0	104596	pUBC-YFP-mod0	FALSE
col_1_teb_4_LB_1_104596_pUBC-YFP-mod0	wt	4	173	0.75	TRUE	2:7350380	reverse	2	7350380	LB	LZ156_1	0		2	TG	0	Col-0	104596	pUBC-YFP-mod0	FALSE
col_1_teb_4_LB_1_104596_pUBC-YFP-mod0	wt	4	406	1	TRUE	2:15210903	reverse	2	15210903	LB	LZ156_1	0		1	T	-8	Col-0	104596	pUBC-YFP-mod0	FALSE
col_1_teb_4_LB_1_104596_pUBC-YFP-mod0	wt	5	331	1	TRUE	2:12309649	forward	2	12309649	LB	LZ156_1	0		1	T	-19	Col-0	104596	pUBC-YFP-mod0	FALSE
col_1_teb_4_LB_1_104596_pUBC-YFP-mod0	wt	3	239	0.75	TRUE	2:18490306	reverse	2	18490306	LB	LZ156_1	1	T	0		-12	Col-0	104596	pUBC-YFP-mod0	FALSE
col_1_teb_4_LB_1_104596_pUBC-YFP-mod0	wt	4	302	0.75	TRUE	2:17194464	reverse	2	17194464	LB	LZ156_1	16	CTATCCTGATAGTTTA	0		-24	Col-0	104596	pUBC-YFP-mod0	FALSE
col_1_teb_4_LB_1_104596_pUBC-YFP-mod0	wt	5	323	1	TRUE	2:15351867	forward	2	15351867	LB	LZ156_1	0		2	CA	-12	Col-0	104596	pUBC-YFP-mod0	FALSE
col_1_teb_4_LB_1_104596_pUBC-YFP-mod0	wt	3	179	1	TRUE	2:18321101	reverse	2	18321101	LB	LZ156_1	0		1	A	-10	Col-0	104596	pUBC-YFP-mod0	FALSE
col_1_teb_4_LB_1_104596_pUBC-YFP-mod0	wt	4	393	1	TRUE	2:839957	reverse	2	839957	LB	LZ156_1	5	TCAAT	0		-4	Col-0	104596	pUBC-YFP-mod0	FALSE
col_1_teb_4_LB_1_104596_pUBC-YFP-mod0	wt	3	245	1	TRUE	2:18301510	forward	2	18301510	LB	LZ156_1	5	ATGTT	0		-24	Col-0	104596	pUBC-YFP-mod0	FALSE
col_1_teb_4_LB_1_104596_pUBC-YFP-mod0	wt	4	271	1	TRUE	2:16342634	reverse	2	16342634	LB	LZ156_1	0		5	TATAT	-4	Col-0	104596	pUBC-YFP-mod0	FALSE
col_1_teb_4_LB_1_104596_pUBC-YFP-mod0	wt	4	183	1	TRUE	2:14964711	forward	2	14964711	LB	LZ156_1	5	GATTA	0		-24	Col-0	104596	pUBC-YFP-mod0	FALSE
col_1_teb_4_LB_1_104596_pUBC-YFP-mod0	wt	3	201	1	TRUE	2:17660698	reverse	2	17660698	LB	LZ156_1	0		0		-19	Col-0	104596	pUBC-YFP-mod0	FALSE
col_1_teb_4_LB_1_104596_pUBC-YFP-mod0	wt	4	232	1	TRUE	2:13567568	reverse	2	13567568	LB	LZ156_1	0		1	G	0	Col-0	104596	pUBC-YFP-mod0	FALSE
col_1_teb_4_LB_1_104596_pUBC-YFP-mod0	wt	3	300	1	TRUE	3:403623	forward	3	403623	LB	LZ156_1	0		3	TCT	-34	Col-0	104596	pUBC-YFP-mod0	FALSE
col_1_teb_4_LB_1_104596_pUBC-YFP-mod0	wt	5	195	1	TRUE	3:403681	reverse	3	403681	LB	LZ156_1	0		6	TTAAAA	-62	Col-0	104596	pUBC-YFP-mod0	FALSE
col_1_teb_4_LB_1_104596_pUBC-YFP-mod0	wt	3	239	1	TRUE	3:486805	forward	3	486805	LB	LZ156_1	0		3	GTG	-48	Col-0	104596	pUBC-YFP-mod0	FALSE
col_1_teb_4_LB_1_104596_pUBC-YFP-mod0	wt	4	310	1	TRUE	3:508598	reverse	3	508598	LB	LZ156_1	0		6	AATTTG	-21	Col-0	104596	pUBC-YFP-mod0	FALSE
col_1_teb_4_LB_1_104596_pUBC-YFP-mod0	wt	3	279	1	TRUE	3:649802	reverse	3	649802	LB	LZ156_1	0		1	C	-27	Col-0	104596	pUBC-YFP-mod0	FALSE
col_1_teb_4_LB_1_104596_pUBC-YFP-mod0	wt	32	405	0.9375	TRUE	3:911603	reverse	3	911603	LB	LZ156_1	20	CCCTGGCCCTTACCCATTCA	0		-39	Col-0	104596	pUBC-YFP-mod0	FALSE
col_1_teb_4_LB_1_104596_pUBC-YFP-mod0	wt	4	219	1	TRUE	3:1170061	reverse	3	1170061	LB	LZ156_1	8	AAACGTCC	0		-41	Col-0	104596	pUBC-YFP-mod0	FALSE
col_1_teb_4_LB_1_104596_pUBC-YFP-mod0	wt	4	387	0.857143	TRUE	3:1982059	forward	3	1982059	LB	LZ156_1	0		4	GTCT	-34	Col-0	104596	pUBC-YFP-mod0	FALSE
col_1_teb_4_LB_1_104596_pUBC-YFP-mod0	wt	3	357	1	TRUE	3:2038299	reverse	3	2038299	LB	LZ156_1	0		2	AA	-25	Col-0	104596	pUBC-YFP-mod0	FALSE
col_1_teb_4_LB_1_104596_pUBC-YFP-mod0	wt	7	147	1	TRUE	3:2438095	forward	3	2438095	LB	LZ156_1	0		2	TC	-35	Col-0	104596	pUBC-YFP-mod0	FALSE
col_1_teb_4_LB_1_104596_pUBC-YFP-mod0	wt	3	224	1	TRUE	3:2568707	forward	3	2568707	LB	LZ156_1	3	TTG	0		-31	Col-0	104596	pUBC-YFP-mod0	FALSE
col_1_teb_4_LB_1_104596_pUBC-YFP-mod0	wt	5	634	1	TRUE	3:2906571	reverse	3	2906571	LB	LZ156_1	0		2	GT	-47	Col-0	104596	pUBC-YFP-mod0	FALSE
col_1_teb_4_LB_1_104596_pUBC-YFP-mod0	wt	4	281	1	TRUE	3:2915592	reverse	3	2915592	LB	LZ156_1	0		0		-39	Col-0	104596	pUBC-YFP-mod0	FALSE
col_1_teb_4_LB_1_104596_pUBC-YFP-mod0	wt	4	318	1	TRUE	3:2915598	reverse	3	2915598	LB	LZ156_1	0		5	AGCGT	-28	Col-0	104596	pUBC-YFP-mod0	FALSE
col_1_teb_4_LB_1_104596_pUBC-YFP-mod0	wt	4	360	1	TRUE	3:2927399	forward	3	2927399	LB	LZ156_1	5	CAGAC	0		-41	Col-0	104596	pUBC-YFP-mod0	FALSE
col_1_teb_4_LB_1_104596_pUBC-YFP-mod0	wt	5	291	0.8	TRUE	3:3070702	reverse	3	3070702	LB	LZ156_1	0		4	TTGT	-36	Col-0	104596	pUBC-YFP-mod0	FALSE
col_1_teb_4_LB_1_104596_pUBC-YFP-mod0	wt	21	342	0.75	TRUE	3:4146472	reverse	3	4146472	LB	LZ156_1	58	AGATTTCAATTAAGTTGTCTAAGCGTCAATTCTCATTCTCCGTCCGCAATGTACCAAA	0		-57	Col-0	104596	pUBC-YFP-mod0	FALSE
col_1_teb_4_LB_1_104596_pUBC-YFP-mod0	wt	4	203	1	TRUE	3:4485700	forward	3	4485700	LB	LZ156_1	0		1	G	-40	Col-0	104596	pUBC-YFP-mod0	FALSE
col_1_teb_4_LB_1_104596_pUBC-YFP-mod0	wt	5	389	1	TRUE	3:4826461	forward	3	4826461	LB	LZ156_1	9	AATTTGTCT	0		-57	Col-0	104596	pUBC-YFP-mod0	FALSE
col_1_teb_4_LB_1_104596_pUBC-YFP-mod0	wt	8	394	1	TRUE	3:4993955	forward	3	4993955	LB	LZ156_1	0		0		-56	Col-0	104596	pUBC-YFP-mod0	FALSE
col_1_teb_4_LB_1_104596_pUBC-YFP-mod0	wt	6	327	0.833333	TRUE	3:4993976	reverse	3	4993976	LB	LZ156_1	0		3	TTT	-22	Col-0	104596	pUBC-YFP-mod0	FALSE
col_1_teb_4_LB_1_104596_pUBC-YFP-mod0	wt	37	412	0.945946	TRUE	3:6842130	forward	3	6842130	LB	LZ156_1	0		2	GT	-20	Col-0	104596	pUBC-YFP-mod0	FALSE
col_1_teb_4_LB_1_104596_pUBC-YFP-mod0	wt	4	449	1	TRUE	3:6967563	forward	3	6967563	LB	LZ156_1	0		1	G	-50	Col-0	104596	pUBC-YFP-mod0	FALSE
col_1_teb_4_LB_1_104596_pUBC-YFP-mod0	wt	3	135	1	TRUE	3:7209663	reverse	3	7209663	LB	LZ156_1	0		4	TAAA	-63	Col-0	104596	pUBC-YFP-mod0	FALSE
col_1_teb_4_LB_1_104596_pUBC-YFP-mod0	wt	11	363	1	TRUE	3:7910430	forward	3	7910430	LB	LZ156_1	0		5	CAATG	-50	Col-0	104596	pUBC-YFP-mod0	FALSE
col_1_teb_4_LB_1_104596_pUBC-YFP-mod0	wt	4	402	1	TRUE	3:8114285	forward	3	8114285	LB	LZ156_1	0		2	AT	-44	Col-0	104596	pUBC-YFP-mod0	FALSE
col_1_teb_4_LB_1_104596_pUBC-YFP-mod0	wt	21	487	0.904762	TRUE	3:8434566	reverse	3	8434566	LB	LZ156_1	0		5	TTGTC	-35	Col-0	104596	pUBC-YFP-mod0	FALSE
col_1_teb_4_LB_1_104596_pUBC-YFP-mod0	wt	19	329	0.947368	TRUE	3:9279201	forward	3	9279201	LB	LZ156_1	5	TATTA	0		-36	Col-0	104596	pUBC-YFP-mod0	FALSE
col_1_teb_4_LB_1_104596_pUBC-YFP-mod0	wt	3	140	1	TRUE	3:10206090	forward	3	10206090	LB	LZ156_1	0		4	AGTT	-38	Col-0	104596	pUBC-YFP-mod0	FALSE
col_1_teb_4_LB_1_104596_pUBC-YFP-mod0	wt	3	134	1	TRUE	3:11761158	reverse	3	11761158	LB	LZ156_1	0		6	TATTAA	-41	Col-0	104596	pUBC-YFP-mod0	FALSE
col_1_teb_4_LB_1_104596_pUBC-YFP-mod0	wt	7	436	1	TRUE	3:15762056	forward	3	15762056	LB	LZ156_1	0		5	TTGTC	-35	Col-0	104596	pUBC-YFP-mod0	FALSE
col_1_teb_4_LB_1_104596_pUBC-YFP-mod0	wt	3	389	1	TRUE	3:16402117	forward	3	16402117	LB	LZ156_1	0		2	AG	-40	Col-0	104596	pUBC-YFP-mod0	FALSE
col_1_teb_4_LB_1_104596_pUBC-YFP-mod0	wt	9	444	1	TRUE	3:17181124	reverse	3	17181124	LB	LZ156_1	0		4	AGTT	-38	Col-0	104596	pUBC-YFP-mod0	FALSE
col_1_teb_4_LB_1_104596_pUBC-YFP-mod0	wt	4	445	0.75	TRUE	3:18012550	reverse	3	18012550	LB	LZ156_1	0		0		-32	Col-0	104596	pUBC-YFP-mod0	FALSE
col_1_teb_4_LB_1_104596_pUBC-YFP-mod0	wt	12	336	0.833333	TRUE	3:18445492	forward	3	18445492	LB	LZ156_1	0		3	TAT	-44	Col-0	104596	pUBC-YFP-mod0	FALSE
col_1_teb_4_LB_1_104596_pUBC-YFP-mod0	wt	4	276	1	TRUE	3:18598710	reverse	3	18598710	LB	LZ156_1	0		6	TCCGCA	-53	Col-0	104596	pUBC-YFP-mod0	FALSE
col_1_teb_4_LB_1_104596_pUBC-YFP-mod0	wt	13	428	0.923077	TRUE	3:19466337	forward	3	19466337	LB	LZ156_1	0		2	TT	-23	Col-0	104596	pUBC-YFP-mod0	FALSE
col_1_teb_4_LB_1_104596_pUBC-YFP-mod0	wt	21	447	0.857143	TRUE	3:19466340	reverse	3	19466340	LB	LZ156_1	0		5	AAGCG	-29	Col-0	104596	pUBC-YFP-mod0	FALSE
col_1_teb_4_LB_1_104596_pUBC-YFP-mod0	wt	3	192	1	TRUE	3:19662352	reverse	3	19662352	LB	LZ156_1	0		1	C	-35	Col-0	104596	pUBC-YFP-mod0	FALSE
col_1_teb_4_LB_1_104596_pUBC-YFP-mod0	wt	26	351	0.925926	TRUE	3:20358236	forward	3	20358236	LB	LZ156_1	0		6	AATGTG	-48	Col-0	104596	pUBC-YFP-mod0	FALSE
col_1_teb_4_LB_1_104596_pUBC-YFP-mod0	wt	4	308	1	TRUE	3:21174170	forward	3	21174170	LB	LZ156_1	18	AATGCATCCCATAGACTT	0		-40	Col-0	104596	pUBC-YFP-mod0	FALSE
col_1_teb_4_LB_1_104596_pUBC-YFP-mod0	wt	3	275	1	TRUE	3:21252672	reverse	3	21252672	LB	LZ156_1	0		1	T	-44	Col-0	104596	pUBC-YFP-mod0	FALSE
col_1_teb_4_LB_1_104596_pUBC-YFP-mod0	wt	14	255	1	TRUE	3:21871067	forward	3	21871067	LB	LZ156_1	0		4	TCTA	-33	Col-0	104596	pUBC-YFP-mod0	FALSE
col_1_teb_4_LB_1_104596_pUBC-YFP-mod0	wt	10	311	0.8	TRUE	3:21871114	reverse	3	21871114	LB	LZ156_1	0		3	TCA	-26	Col-0	104596	pUBC-YFP-mod0	FALSE
col_1_teb_4_LB_1_104596_pUBC-YFP-mod0	wt	23	318	0.956522	TRUE	3:22154695	reverse	3	22154695	LB	LZ156_1	0		2	AA	-25	Col-0	104596	pUBC-YFP-mod0	FALSE
col_1_teb_4_LB_1_104596_pUBC-YFP-mod0	wt	6	331	1	TRUE	3:22618648	forward	3	22618648	LB	LZ156_1	7	GATCGAC	0		-33	Col-0	104596	pUBC-YFP-mod0	FALSE
col_1_teb_4_LB_1_104596_pUBC-YFP-mod0	wt	6	312	1	TRUE	3:20872065	reverse	3	20872065	LB	LZ156_1	11	GATTTAGGTGG	0		-6	Col-0	104596	pUBC-YFP-mod0	FALSE
col_1_teb_4_LB_1_104596_pUBC-YFP-mod0	wt	3	351	1	TRUE	3:4817616	forward	3	4817616	LB	LZ156_1	0		0		-9	Col-0	104596	pUBC-YFP-mod0	FALSE
col_1_teb_4_LB_1_104596_pUBC-YFP-mod0	wt	3	321	1	TRUE	3:8266915	reverse	3	8266915	LB	LZ156_1	0		0		-13	Col-0	104596	pUBC-YFP-mod0	FALSE
col_1_teb_4_LB_1_104596_pUBC-YFP-mod0	wt	4	250	1	TRUE	3:3090191	reverse	3	3090191	LB	LZ156_1	22	CGTGTGACTACGTACGATTCCG	0		-5	Col-0	104596	pUBC-YFP-mod0	FALSE
col_1_teb_4_LB_1_104596_pUBC-YFP-mod0	wt	3	370	1	TRUE	3:10501495	reverse	3	10501495	LB	LZ156_1	0		2	CA	-12	Col-0	104596	pUBC-YFP-mod0	FALSE
col_1_teb_4_LB_1_104596_pUBC-YFP-mod0	wt	16	364	0.8125	TRUE	3:350196	forward	3	350196	LB	LZ156_1	16	AAGTTTCTTAAGGCAG	0		-7	Col-0	104596	pUBC-YFP-mod0	FALSE
col_1_teb_4_LB_1_104596_pUBC-YFP-mod0	wt	5	270	0.8	TRUE	3:9758694	reverse	3	9758694	LB	LZ156_1	0		4	GTTT	-18	Col-0	104596	pUBC-YFP-mod0	FALSE
col_1_teb_4_LB_1_104596_pUBC-YFP-mod0	wt	8	410	0.875	TRUE	3:16349894	forward	3	16349894	LB	LZ156_1	0		4	TGTT	-19	Col-0	104596	pUBC-YFP-mod0	FALSE
col_1_teb_4_LB_1_104596_pUBC-YFP-mod0	wt	4	261	1	TRUE	3:528858	forward	3	528858	LB	LZ156_1	0		3	TAT	-4	Col-0	104596	pUBC-YFP-mod0	FALSE
col_1_teb_4_LB_1_104596_pUBC-YFP-mod0	wt	6	242	0.75	TRUE	3:3384011	reverse	3	3384011	LB	LZ156_1	0		3	CAA	-9	Col-0	104596	pUBC-YFP-mod0	FALSE
col_1_teb_4_LB_1_104596_pUBC-YFP-mod0	wt	5	134	1	TRUE	3:7231468	reverse	3	7231468	LB	LZ156_1	18	CGTCCACCTCTTTTATGA	0		-23	Col-0	104596	pUBC-YFP-mod0	FALSE
col_1_teb_4_LB_1_104596_pUBC-YFP-mod0	wt	19	537	0.947368	TRUE	3:9279257	reverse	3	9279257	LB	LZ156_1	0		8	TTTGTTTA	-17	Col-0	104596	pUBC-YFP-mod0	FALSE
col_1_teb_4_LB_1_104596_pUBC-YFP-mod0	wt	5	178	1	TRUE	3:18929543	forward	3	18929543	LB	LZ156_1	1	G	0		-8	Col-0	104596	pUBC-YFP-mod0	FALSE
col_1_teb_4_LB_1_104596_pUBC-YFP-mod0	wt	3	118	1	TRUE	3:19262024	reverse	3	19262024	LB	LZ156_1	23	GTGTTATTAAGTTGTCTAAGCGT	0		-8	Col-0	104596	pUBC-YFP-mod0	FALSE
col_1_teb_4_LB_1_104596_pUBC-YFP-mod0	wt	7	437	1	TRUE	3:21050056	forward	3	21050056	LB	LZ156_1	0		7	TATCCTG	0	Col-0	104596	pUBC-YFP-mod0	FALSE
col_1_teb_4_LB_1_104596_pUBC-YFP-mod0	wt	10	456	0.9	TRUE	3:19855762	reverse	3	19855762	LB	LZ156_1	1	G	0		-18	Col-0	104596	pUBC-YFP-mod0	FALSE
col_1_teb_4_LB_1_104596_pUBC-YFP-mod0	wt	7	363	1	TRUE	3:19548167	forward	3	19548167	LB	LZ156_1	7	CTGTTGA	0		-22	Col-0	104596	pUBC-YFP-mod0	FALSE
col_1_teb_4_LB_1_104596_pUBC-YFP-mod0	wt	5	343	0.8	TRUE	3:22951447	reverse	3	22951447	LB	LZ156_1	0		1	T	-19	Col-0	104596	pUBC-YFP-mod0	FALSE
col_1_teb_4_LB_1_104596_pUBC-YFP-mod0	wt	17	446	0.941176	TRUE	3:19548789	reverse	3	19548789	LB	LZ156_1	3	GTG	0		-24	Col-0	104596	pUBC-YFP-mod0	FALSE
col_1_teb_4_LB_1_104596_pUBC-YFP-mod0	wt	5	262	1	TRUE	3:3213261	reverse	3	3213261	LB	LZ156_1	0		0		-8	Col-0	104596	pUBC-YFP-mod0	FALSE
col_1_teb_4_LB_1_104596_pUBC-YFP-mod0	wt	5	191	0.8	TRUE	3:2492353	forward	3	2492353	LB	LZ156_1	0		3	CAC	-11	Col-0	104596	pUBC-YFP-mod0	FALSE
col_1_teb_4_LB_1_104596_pUBC-YFP-mod0	wt	4	311	0.75	TRUE	3:22688577	reverse	3	22688577	LB	LZ156_1	3	CCA	0		-8	Col-0	104596	pUBC-YFP-mod0	FALSE
col_1_teb_4_LB_1_104596_pUBC-YFP-mod0	wt	8	507	0.75	TRUE	3:8015417	reverse	3	8015417	LB	LZ156_1	2	TG	0		-4	Col-0	104596	pUBC-YFP-mod0	FALSE
col_1_teb_4_LB_1_104596_pUBC-YFP-mod0	wt	4	304	1	TRUE	3:5832834	reverse	3	5832834	LB	LZ156_1	0		3	ACA	-15	Col-0	104596	pUBC-YFP-mod0	FALSE
col_1_teb_4_LB_1_104596_pUBC-YFP-mod0	wt	6	224	1	TRUE	3:20808184	forward	3	20808184	LB	LZ156_1	0		1	A	-15	Col-0	104596	pUBC-YFP-mod0	FALSE
col_1_teb_4_LB_1_104596_pUBC-YFP-mod0	wt	4	116	1	TRUE	3:23426738	reverse	3	23426738	LB	LZ156_1	0		0		-17	Col-0	104596	pUBC-YFP-mod0	FALSE
col_1_teb_4_LB_1_104596_pUBC-YFP-mod0	wt	7	170	1	TRUE	3:3420932	forward	3	3420932	LB	LZ156_1	38	TTCAGAACATGCAAGACTATATAATGGATACACTCTCT	0		-38	Col-0	104596	pUBC-YFP-mod0	FALSE
col_1_teb_4_LB_1_104596_pUBC-YFP-mod0	wt	7	205	1	TRUE	3:16729697	forward	3	16729697	LB	LZ156_1	38	CTATCCGCCGAAGGTGGTAACGACTGGATAGAGCAGCT	0		-24	Col-0	104596	pUBC-YFP-mod0	FALSE
col_1_teb_4_LB_1_104596_pUBC-YFP-mod0	wt	6	328	1	TRUE	3:22888391	forward	3	22888391	LB	LZ156_1	6	GTGTAT	0		-24	Col-0	104596	pUBC-YFP-mod0	FALSE
col_1_teb_4_LB_1_104596_pUBC-YFP-mod0	wt	4	228	0.75	TRUE	3:15905722	forward	3	15905722	LB	LZ156_1	0		1	A	-9	Col-0	104596	pUBC-YFP-mod0	FALSE
col_1_teb_4_LB_1_104596_pUBC-YFP-mod0	wt	5	295	0.8	TRUE	3:10935717	reverse	3	10935717	LB	LZ156_1	0		2	TT	-19	Col-0	104596	pUBC-YFP-mod0	FALSE
col_1_teb_4_LB_1_104596_pUBC-YFP-mod0	wt	3	141	1	TRUE	3:3384024	reverse	3	3384024	LB	LZ156_1	2	TG	0		0	Col-0	104596	pUBC-YFP-mod0	FALSE
col_1_teb_4_LB_1_104596_pUBC-YFP-mod0	wt	3	274	1	TRUE	3:20362835	forward	3	20362835	LB	LZ156_1	8	AAACATTT	0		-20	Col-0	104596	pUBC-YFP-mod0	FALSE
col_1_teb_4_LB_1_104596_pUBC-YFP-mod0	wt	3	345	1	TRUE	3:101076	reverse	3	101076	LB	LZ156_1	0		7	TACACCA	-12	Col-0	104596	pUBC-YFP-mod0	FALSE
col_1_teb_4_LB_1_104596_pUBC-YFP-mod0	wt	3	225	1	TRUE	3:13482415	reverse	3	13482415	LB	LZ156_1	4	ACAA	0		-3	Col-0	104596	pUBC-YFP-mod0	FALSE
col_1_teb_4_LB_1_104596_pUBC-YFP-mod0	wt	3	371	1	TRUE	3:1623122	reverse	3	1623122	LB	LZ156_1	3	TAA	0		-17	Col-0	104596	pUBC-YFP-mod0	FALSE
col_1_teb_4_LB_1_104596_pUBC-YFP-mod0	wt	3	282	1	TRUE	3:22811672	forward	3	22811672	LB	LZ156_1	10	TGGCCTTAAG	0		-18	Col-0	104596	pUBC-YFP-mod0	FALSE
col_1_teb_4_LB_1_104596_pUBC-YFP-mod0	wt	3	340	1	TRUE	3:23186085	forward	3	23186085	LB	LZ156_1	0		8	TGTTTACA	-15	Col-0	104596	pUBC-YFP-mod0	FALSE
col_1_teb_4_LB_1_104596_pUBC-YFP-mod0	wt	4	518	1	TRUE	3:22983908	reverse	3	22983908	LB	LZ156_1	0		2	AT	-8	Col-0	104596	pUBC-YFP-mod0	FALSE
col_1_teb_4_LB_1_104596_pUBC-YFP-mod0	wt	5	247	1	TRUE	3:2723698	reverse	3	2723698	LB	LZ156_1	13	GCTCATAATGGAT	0		-13	Col-0	104596	pUBC-YFP-mod0	FALSE
col_1_teb_4_LB_1_104596_pUBC-YFP-mod0	wt	6	299	0.833333	TRUE	3:508567	forward	3	508567	LB	LZ156_1	0		4	TACA	-15	Col-0	104596	pUBC-YFP-mod0	FALSE
col_1_teb_4_LB_1_104596_pUBC-YFP-mod0	wt	3	511	1	TRUE	3:7332357	reverse	3	7332357	LB	LZ156_1	0		2	AT	-4	Col-0	104596	pUBC-YFP-mod0	FALSE
col_1_teb_4_LB_1_104596_pUBC-YFP-mod0	wt	4	302	1	TRUE	3:22312458	forward	3	22312458	LB	LZ156_1	0		4	TTGT	-20	Col-0	104596	pUBC-YFP-mod0	FALSE
col_1_teb_4_LB_1_104596_pUBC-YFP-mod0	wt	3	232	1	TRUE	3:2764402	reverse	3	2764402	LB	LZ156_1	2	AA	0		-15	Col-0	104596	pUBC-YFP-mod0	FALSE
col_1_teb_4_LB_1_104596_pUBC-YFP-mod0	wt	4	211	1	TRUE	3:20754196	reverse	3	20754196	LB	LZ156_1	0		3	CAC	-11	Col-0	104596	pUBC-YFP-mod0	FALSE
col_1_teb_4_LB_1_104596_pUBC-YFP-mod0	wt	3	195	1	TRUE	3:2896094	forward	3	2896094	LB	LZ156_1	6	TACAAA	0		0	Col-0	104596	pUBC-YFP-mod0	FALSE
col_1_teb_4_LB_1_104596_pUBC-YFP-mod0	wt	4	445	1	TRUE	3:19098466	forward	3	19098466	LB	LZ156_1	10	CTAAACGTCC	0		-20	Col-0	104596	pUBC-YFP-mod0	FALSE
col_1_teb_4_LB_1_104596_pUBC-YFP-mod0	wt	4	278	1	TRUE	3:22535921	reverse	3	22535921	LB	LZ156_1	14	TCGAATGTGTGACA	0		-8	Col-0	104596	pUBC-YFP-mod0	FALSE
col_1_teb_4_LB_1_104596_pUBC-YFP-mod0	wt	3	233	1	TRUE	3:19008599	forward	3	19008599	LB	LZ156_1	2	AG	0		-17	Col-0	104596	pUBC-YFP-mod0	FALSE
col_1_teb_4_LB_1_104596_pUBC-YFP-mod0	wt	3	254	1	TRUE	3:10694628	reverse	3	10694628	LB	LZ156_1	0		3	ATA	-7	Col-0	104596	pUBC-YFP-mod0	FALSE
col_1_teb_4_LB_1_104596_pUBC-YFP-mod0	wt	3	315	1	TRUE	3:21766429	reverse	3	21766429	LB	LZ156_1	17	GTGTTATTCAGTACATT	0		-8	Col-0	104596	pUBC-YFP-mod0	FALSE
col_1_teb_4_LB_1_104596_pUBC-YFP-mod0	wt	4	273	1	TRUE	Pt:72107	reverse	Pt	72107	LB	LZ156_1	0		3	TCT	-34	Col-0	104596	pUBC-YFP-mod0	FALSE
col_1_teb_4_LB_1_104596_pUBC-YFP-mod0	wt	5	425	1	TRUE	Pt:55887	forward	Pt	55887	LB	LZ156_1	17	GATCCATAATCATTGTG	0		-19	Col-0	104596	pUBC-YFP-mod0	FALSE
col_1_teb_4_LB_1_104596_pUBC-YFP-mod0	wt	6	298	0.833333	TRUE	4:1495394	reverse	4	1495394	LB	LZ156_1	0		6	GTGTTA	-45	Col-0	104596	pUBC-YFP-mod0	FALSE
col_1_teb_4_LB_1_104596_pUBC-YFP-mod0	wt	8	257	1	TRUE	4:2289790	reverse	4	2289790	LB	LZ156_1	0		7	GTTATTA	-42	Col-0	104596	pUBC-YFP-mod0	FALSE
col_1_teb_4_LB_1_104596_pUBC-YFP-mod0	wt	6	299	1	TRUE	4:6405252	forward	4	6405252	LB	LZ156_1	0		1	T	-23	Col-0	104596	pUBC-YFP-mod0	FALSE
col_1_teb_4_LB_1_104596_pUBC-YFP-mod0	wt	4	290	1	TRUE	4:6668797	reverse	4	6668797	LB	LZ156_1	0		2	TC	-27	Col-0	104596	pUBC-YFP-mod0	FALSE
col_1_teb_4_LB_1_104596_pUBC-YFP-mod0	wt	3	94	1	TRUE	4:6962449	forward	4	6962449	LB	LZ156_1	0		3	TAT	-44	Col-0	104596	pUBC-YFP-mod0	FALSE
col_1_teb_4_LB_1_104596_pUBC-YFP-mod0	wt	7	345	1	TRUE	4:7595400	forward	4	7595400	LB	LZ156_1	0		2	TG	-48	Col-0	104596	pUBC-YFP-mod0	FALSE
col_1_teb_4_LB_1_104596_pUBC-YFP-mod0	wt	7	340	1	TRUE	4:8039972	forward	4	8039972	LB	LZ156_1	0		0		-25	Col-0	104596	pUBC-YFP-mod0	FALSE
col_1_teb_4_LB_1_104596_pUBC-YFP-mod0	wt	5	315	1	TRUE	4:8316767	forward	4	8316767	LB	LZ156_1	7	CTTTATA	0		-60	Col-0	104596	pUBC-YFP-mod0	FALSE
col_1_teb_4_LB_1_104596_pUBC-YFP-mod0	wt	5	667	1	TRUE	4:8845795	reverse	4	8845795	LB	LZ156_1	0		1	T	-23	Col-0	104596	pUBC-YFP-mod0	FALSE
col_1_teb_4_LB_1_104596_pUBC-YFP-mod0	wt	3	156	1	TRUE	4:9040650	forward	4	9040650	LB	LZ156_1	9	TATCACTTT	0		-41	Col-0	104596	pUBC-YFP-mod0	FALSE
col_1_teb_4_LB_1_104596_pUBC-YFP-mod0	wt	3	321	1	TRUE	4:9830192	reverse	4	9830192	LB	LZ156_1	0		3	TAA	-32	Col-0	104596	pUBC-YFP-mod0	FALSE
col_1_teb_4_LB_1_104596_pUBC-YFP-mod0	wt	19	459	0.954545	TRUE	4:9901084	forward	4	9901084	LB	LZ156_1	0		6	TTATTA	-42	Col-0	104596	pUBC-YFP-mod0	FALSE
col_1_teb_4_LB_1_104596_pUBC-YFP-mod0	wt	3	227	1	TRUE	4:10443026	forward	4	10443026	LB	LZ156_1	0		2	TG	-21	Col-0	104596	pUBC-YFP-mod0	FALSE
col_1_teb_4_LB_1_104596_pUBC-YFP-mod0	wt	4	265	1	TRUE	4:10576929	reverse	4	10576929	LB	LZ156_1	0		1	T	-46	Col-0	104596	pUBC-YFP-mod0	FALSE
col_1_teb_4_LB_1_104596_pUBC-YFP-mod0	wt	3	207	1	TRUE	4:10604894	forward	4	10604894	LB	LZ156_1	0		2	TT	-22	Col-0	104596	pUBC-YFP-mod0	FALSE
col_1_teb_4_LB_1_104596_pUBC-YFP-mod0	wt	7	199	1	TRUE	4:10820140	forward	4	10820140	LB	LZ156_1	0		0		-37	Col-0	104596	pUBC-YFP-mod0	FALSE
col_1_teb_4_LB_1_104596_pUBC-YFP-mod0	wt	3	204	1	TRUE	4:11145298	forward	4	11145298	LB	LZ156_1	0		3	CTA	-33	Col-0	104596	pUBC-YFP-mod0	FALSE
col_1_teb_4_LB_1_104596_pUBC-YFP-mod0	wt	14	477	0.928571	TRUE	4:11288646	forward	4	11288646	LB	LZ156_1	1	C	0		-60	Col-0	104596	pUBC-YFP-mod0	FALSE
col_1_teb_4_LB_1_104596_pUBC-YFP-mod0	wt	4	222	1	TRUE	4:12348618	reverse	4	12348618	LB	LZ156_1	0		2	AT	-24	Col-0	104596	pUBC-YFP-mod0	FALSE
col_1_teb_4_LB_1_104596_pUBC-YFP-mod0	wt	4	456	0.75	TRUE	4:12926593	reverse	4	12926593	LB	LZ156_1	6	ATCAAC	0		-38	Col-0	104596	pUBC-YFP-mod0	FALSE
col_1_teb_4_LB_1_104596_pUBC-YFP-mod0	wt	18	393	0.944444	TRUE	4:12976780	reverse	4	12976780	LB	LZ156_1	0		3	AGC	-30	Col-0	104596	pUBC-YFP-mod0	FALSE
col_1_teb_4_LB_1_104596_pUBC-YFP-mod0	wt	6	231	1	TRUE	4:13652604	reverse	4	13652604	LB	LZ156_1	0		6	AAGTTG	-37	Col-0	104596	pUBC-YFP-mod0	FALSE
col_1_teb_4_LB_1_104596_pUBC-YFP-mod0	wt	21	479	0.857143	TRUE	4:13677685	reverse	4	13677685	LB	LZ156_1	0		3	AGT	-39	Col-0	104596	pUBC-YFP-mod0	FALSE
col_1_teb_4_LB_1_104596_pUBC-YFP-mod0	wt	7	242	0.857143	TRUE	4:13711045	forward	4	13711045	LB	LZ156_1	0		3	GTG	-48	Col-0	104596	pUBC-YFP-mod0	FALSE
col_1_teb_4_LB_1_104596_pUBC-YFP-mod0	wt	10	390	1	TRUE	4:13860743	reverse	4	13860743	LB	LZ156_1	0		3	AAG	-40	Col-0	104596	pUBC-YFP-mod0	FALSE
col_1_teb_4_LB_1_104596_pUBC-YFP-mod0	wt	3	152	1	TRUE	4:14402400	reverse	4	14402400	LB	LZ156_1	0		2	TC	-27	Col-0	104596	pUBC-YFP-mod0	FALSE
col_1_teb_4_LB_1_104596_pUBC-YFP-mod0	wt	18	416	0.944444	TRUE	4:14581631	reverse	4	14581631	LB	LZ156_1	0		1	T	-47	Col-0	104596	pUBC-YFP-mod0	FALSE
col_1_teb_4_LB_1_104596_pUBC-YFP-mod0	wt	3	166	1	TRUE	4:14779722	reverse	4	14779722	LB	LZ156_1	0		1	T	-23	Col-0	104596	pUBC-YFP-mod0	FALSE
col_1_teb_4_LB_1_104596_pUBC-YFP-mod0	wt	10	428	1	TRUE	4:15170260	reverse	4	15170260	LB	LZ156_1	0		8	AATGTGTT	-46	Col-0	104596	pUBC-YFP-mod0	FALSE
col_1_teb_4_LB_1_104596_pUBC-YFP-mod0	wt	6	374	1	TRUE	4:15580213	forward	4	15580213	LB	LZ156_1	0		2	AA	-25	Col-0	104596	pUBC-YFP-mod0	FALSE
col_1_teb_4_LB_1_104596_pUBC-YFP-mod0	wt	4	587	1	TRUE	4:15586042	forward	4	15586042	LB	LZ156_1	0		0		-25	Col-0	104596	pUBC-YFP-mod0	FALSE
col_1_teb_4_LB_1_104596_pUBC-YFP-mod0	wt	6	260	0.833333	TRUE	4:15948310	forward	4	15948310	LB	LZ156_1	7	CGCAATG	0		-27	Col-0	104596	pUBC-YFP-mod0	FALSE
col_1_teb_4_LB_1_104596_pUBC-YFP-mod0	wt	9	210	0.888889	TRUE	4:15972534	forward	4	15972534	LB	LZ156_1	13	ATGATGATTCTGA	0		-59	Col-0	104596	pUBC-YFP-mod0	FALSE
col_1_teb_4_LB_1_104596_pUBC-YFP-mod0	wt	28	493	0.862069	TRUE	4:16654148	reverse	4	16654148	LB	LZ156_1	0		3	TGT	-20	Col-0	104596	pUBC-YFP-mod0	FALSE
col_1_teb_4_LB_1_104596_pUBC-YFP-mod0	wt	6	383	0.833333	TRUE	4:16722116	reverse	4	16722116	LB	LZ156_1	0		4	TCTA	-33	Col-0	104596	pUBC-YFP-mod0	FALSE
col_1_teb_4_LB_1_104596_pUBC-YFP-mod0	wt	6	374	0.833333	TRUE	4:16767132	reverse	4	16767132	LB	LZ156_1	0		2	TG	-37	Col-0	104596	pUBC-YFP-mod0	FALSE
col_1_teb_4_LB_1_104596_pUBC-YFP-mod0	wt	3	119	1	TRUE	4:17248874	reverse	4	17248874	LB	LZ156_1	0		2	AG	-31	Col-0	104596	pUBC-YFP-mod0	FALSE
col_1_teb_4_LB_1_104596_pUBC-YFP-mod0	wt	4	336	1	TRUE	4:17348000	forward	4	17348000	LB	LZ156_1	0		4	CAAT	-24	Col-0	104596	pUBC-YFP-mod0	FALSE
col_1_teb_4_LB_1_104596_pUBC-YFP-mod0	wt	3	312	1	TRUE	4:17767475	forward	4	17767475	LB	LZ156_1	0		4	CAAT	-24	Col-0	104596	pUBC-YFP-mod0	FALSE
col_1_teb_4_LB_1_104596_pUBC-YFP-mod0	wt	4	165	1	TRUE	4:18082287	forward	4	18082287	LB	LZ156_1	0		3	ATG	-50	Col-0	104596	pUBC-YFP-mod0	FALSE
col_1_teb_4_LB_1_104596_pUBC-YFP-mod0	wt	24	362	1	TRUE	4:18208766	forward	4	18208766	LB	LZ156_1	0		2	TG	-48	Col-0	104596	pUBC-YFP-mod0	FALSE
col_1_teb_4_LB_1_104596_pUBC-YFP-mod0	wt	9	472	0.777778	TRUE	4:18508955	reverse	4	18508955	LB	LZ156_1	30	GGCATCGACTTCAAGGAGGACGCAAACCGC	0		-40	Col-0	104596	pUBC-YFP-mod0	FALSE
col_1_teb_4_LB_1_104596_pUBC-YFP-mod0	wt	29	629	0.931034	TRUE	4:14087063	forward	4	14087063	LB	LZ156_1	8	GTGACACA	0		-21	Col-0	104596	pUBC-YFP-mod0	FALSE
col_1_teb_4_LB_1_104596_pUBC-YFP-mod0	wt	3	158	1	TRUE	4:16203471	forward	4	16203471	LB	LZ156_1	0		1	C	-16	Col-0	104596	pUBC-YFP-mod0	FALSE
col_1_teb_4_LB_1_104596_pUBC-YFP-mod0	wt	8	371	1	TRUE	4:6668783	forward	4	6668783	LB	LZ156_1	10	ATGTATGGAT	0		-30	Col-0	104596	pUBC-YFP-mod0	FALSE
col_1_teb_4_LB_1_104596_pUBC-YFP-mod0	wt	8	336	1	TRUE	4:10095741	forward	4	10095741	LB	LZ156_1	0		0		-15	Col-0	104596	pUBC-YFP-mod0	FALSE
col_1_teb_4_LB_1_104596_pUBC-YFP-mod0	wt	5	307	0.8	TRUE	4:11889678	reverse	4	11889678	LB	LZ156_1	0		5	ACACC	-13	Col-0	104596	pUBC-YFP-mod0	FALSE
col_1_teb_4_LB_1_104596_pUBC-YFP-mod0	wt	6	277	0.833333	TRUE	4:13920808	forward	4	13920808	LB	LZ156_1	0		2	AC	-11	Col-0	104596	pUBC-YFP-mod0	FALSE
col_1_teb_4_LB_1_104596_pUBC-YFP-mod0	wt	5	350	1	TRUE	4:7317672	forward	4	7317672	LB	LZ156_1	0		3	ACA	-10	Col-0	104596	pUBC-YFP-mod0	FALSE
col_1_teb_4_LB_1_104596_pUBC-YFP-mod0	wt	3	272	1	TRUE	4:1559091	reverse	4	1559091	LB	LZ156_1	0		1	T	-20	Col-0	104596	pUBC-YFP-mod0	FALSE
col_1_teb_4_LB_1_104596_pUBC-YFP-mod0	wt	13	523	0.928571	TRUE	4:233614	reverse	4	233614	LB	LZ156_1	0		2	CA	-15	Col-0	104596	pUBC-YFP-mod0	FALSE
col_1_teb_4_LB_1_104596_pUBC-YFP-mod0	wt	8	341	1	TRUE	4:8523692	reverse	4	8523692	LB	LZ156_1	9	TTAAAAACC	0		-15	Col-0	104596	pUBC-YFP-mod0	FALSE
col_1_teb_4_LB_1_104596_pUBC-YFP-mod0	wt	3	310	1	TRUE	4:17930066	forward	4	17930066	LB	LZ156_1	3	GCG	0		-11	Col-0	104596	pUBC-YFP-mod0	FALSE
col_1_teb_4_LB_1_104596_pUBC-YFP-mod0	wt	5	150	1	TRUE	4:18382459	forward	4	18382459	LB	LZ156_1	6	TACAAG	0		-22	Col-0	104596	pUBC-YFP-mod0	FALSE
col_1_teb_4_LB_1_104596_pUBC-YFP-mod0	wt	3	208	1	TRUE	4:10899127	forward	4	10899127	LB	LZ156_1	0		2	TG	0	Col-0	104596	pUBC-YFP-mod0	FALSE
col_1_teb_4_LB_1_104596_pUBC-YFP-mod0	wt	6	248	0.833333	TRUE	4:8516099	forward	4	8516099	LB	LZ156_1	0		5	ACAAT	-8	Col-0	104596	pUBC-YFP-mod0	FALSE
col_1_teb_4_LB_1_104596_pUBC-YFP-mod0	wt	3	161	1	TRUE	4:16094317	forward	4	16094317	LB	LZ156_1	2	CA	0		-20	Col-0	104596	pUBC-YFP-mod0	FALSE
col_1_teb_4_LB_1_104596_pUBC-YFP-mod0	wt	10	406	0.8	TRUE	4:15875472	forward	4	15875472	LB	LZ156_1	0		2	TG	0	Col-0	104596	pUBC-YFP-mod0	FALSE
col_1_teb_4_LB_1_104596_pUBC-YFP-mod0	wt	4	269	0.75	TRUE	4:35052	reverse	4	35052	LB	LZ156_1	0		3	CAA	-9	Col-0	104596	pUBC-YFP-mod0	FALSE
col_1_teb_4_LB_1_104596_pUBC-YFP-mod0	wt	8	147	0.875	TRUE	4:18387011	forward	4	18387011	LB	LZ156_1	15	GTTTAAAAGCGTCAA	0		-10	Col-0	104596	pUBC-YFP-mod0	FALSE
col_1_teb_4_LB_1_104596_pUBC-YFP-mod0	wt	3	265	1	TRUE	4:17017511	reverse	4	17017511	LB	LZ156_1	8	TTTATTGT	0		-10	Col-0	104596	pUBC-YFP-mod0	FALSE
col_1_teb_4_LB_1_104596_pUBC-YFP-mod0	wt	9	381	1	TRUE	4:15875504	reverse	4	15875504	LB	LZ156_1	0		7	TTTACAC	-14	Col-0	104596	pUBC-YFP-mod0	FALSE
col_1_teb_4_LB_1_104596_pUBC-YFP-mod0	wt	3	158	1	TRUE	4:18423417	forward	4	18423417	LB	LZ156_1	18	ATAAACAAATTGACGCTT	0		0	Col-0	104596	pUBC-YFP-mod0	FALSE
col_1_teb_4_LB_1_104596_pUBC-YFP-mod0	wt	8	364	1	TRUE	4:11638613	forward	4	11638613	LB	LZ156_1	14	GGTCCATGATCACA	0		-24	Col-0	104596	pUBC-YFP-mod0	FALSE
col_1_teb_4_LB_1_104596_pUBC-YFP-mod0	wt	10	444	0.9	TRUE	4:9648541	forward	4	9648541	LB	LZ156_1	8	CTTTTAAT	0		-22	Col-0	104596	pUBC-YFP-mod0	FALSE
col_1_teb_4_LB_1_104596_pUBC-YFP-mod0	wt	3	258	1	TRUE	4:6444277	forward	4	6444277	LB	LZ156_1	0		3	CAA	-9	Col-0	104596	pUBC-YFP-mod0	FALSE
col_1_teb_4_LB_1_104596_pUBC-YFP-mod0	wt	5	451	0.8	TRUE	4:15591186	reverse	4	15591186	LB	LZ156_1	21	CACATTGAGTTATCTAAGCAT	0		-7	Col-0	104596	pUBC-YFP-mod0	FALSE
col_1_teb_4_LB_1_104596_pUBC-YFP-mod0	wt	4	276	1	TRUE	4:13478462	forward	4	13478462	LB	LZ156_1	32	CGCGCTTGCTGCTTGGATGCCCGAGGTTTGAA	0		-25	Col-0	104596	pUBC-YFP-mod0	FALSE
col_1_teb_4_LB_1_104596_pUBC-YFP-mod0	wt	4	260	0.75	TRUE	4:6250487	forward	4	6250487	LB	LZ156_1	0		2	CT	-1	Col-0	104596	pUBC-YFP-mod0	FALSE
col_1_teb_4_LB_1_104596_pUBC-YFP-mod0	wt	3	477	1	TRUE	4:7925593	forward	4	7925593	LB	LZ156_1	7	AGTTGTC	0		-25	Col-0	104596	pUBC-YFP-mod0	FALSE
col_1_teb_4_LB_1_104596_pUBC-YFP-mod0	wt	4	156	1	TRUE	4:18382478	reverse	4	18382478	LB	LZ156_1	0		0		-4	Col-0	104596	pUBC-YFP-mod0	FALSE
col_1_teb_4_LB_1_104596_pUBC-YFP-mod0	wt	10	537	0.9	TRUE	4:13438415	forward	4	13438415	LB	LZ156_1	14	GGCGCGCGGTGTCA	0		-12	Col-0	104596	pUBC-YFP-mod0	FALSE
col_1_teb_4_LB_1_104596_pUBC-YFP-mod0	wt	4	151	1	TRUE	4:10094524	reverse	4	10094524	LB	LZ156_1	0		4	CAAT	-8	Col-0	104596	pUBC-YFP-mod0	FALSE
col_1_teb_4_LB_1_104596_pUBC-YFP-mod0	wt	3	239	1	TRUE	4:741250	reverse	4	741250	LB	LZ156_1	0		3	ATC	-3	Col-0	104596	pUBC-YFP-mod0	FALSE
col_1_teb_4_LB_1_104596_pUBC-YFP-mod0	wt	5	310	1	TRUE	4:18068344	reverse	4	18068344	LB	LZ156_1	0		2	AC	-14	Col-0	104596	pUBC-YFP-mod0	FALSE
col_1_teb_4_LB_1_104596_pUBC-YFP-mod0	wt	4	398	0.75	TRUE	4:13132574	forward	4	13132574	LB	LZ156_1	0		9	TAAATCCTG	0	Col-0	104596	pUBC-YFP-mod0	FALSE
col_1_teb_4_LB_1_104596_pUBC-YFP-mod0	wt	5	312	1	TRUE	4:13132601	reverse	4	13132601	LB	LZ156_1	4	GCGG	0		-6	Col-0	104596	pUBC-YFP-mod0	FALSE
col_1_teb_4_LB_1_104596_pUBC-YFP-mod0	wt	3	190	1	TRUE	4:2180878	forward	4	2180878	LB	LZ156_1	0		5	TTTGT	-20	Col-0	104596	pUBC-YFP-mod0	FALSE
col_1_teb_4_LB_1_104596_pUBC-YFP-mod0	wt	5	265	1	TRUE	4:1418649	forward	4	1418649	LB	LZ156_1	13	CAGGATATATCCT	0		-9	Col-0	104596	pUBC-YFP-mod0	FALSE
col_1_teb_4_LB_1_104596_pUBC-YFP-mod0	wt	3	163	1	TRUE	4:16781939	forward	4	16781939	LB	LZ156_1	0		2	TG	0	Col-0	104596	pUBC-YFP-mod0	FALSE
col_1_teb_4_LB_1_104596_pUBC-YFP-mod0	wt	3	210	1	TRUE	4:11369941	forward	4	11369941	LB	LZ156_1	0		5	CACAA	-9	Col-0	104596	pUBC-YFP-mod0	FALSE
col_1_teb_4_LB_1_104596_pUBC-YFP-mod0	wt	5	495	0.857143	TRUE	4:11384450	reverse	4	11384450	LB	LZ156_1	0		6	CATATA	-5	Col-0	104596	pUBC-YFP-mod0	FALSE
col_1_teb_4_LB_1_104596_pUBC-YFP-mod0	wt	3	244	1	TRUE	4:8349607	forward	4	8349607	LB	LZ156_1	2	GT	0		-20	Col-0	104596	pUBC-YFP-mod0	FALSE
col_1_teb_4_LB_1_104596_pUBC-YFP-mod0	wt	3	255	1	TRUE	4:14454581	forward	4	14454581	LB	LZ156_1	7	GTGTTAT	0		-8	Col-0	104596	pUBC-YFP-mod0	FALSE
col_1_teb_4_LB_1_104596_pUBC-YFP-mod0	wt	6	269	1	TRUE	4:13844805	forward	4	13844805	LB	LZ156_1	17	CACTATATTGTTTAAAA	0		-30	Col-0	104596	pUBC-YFP-mod0	FALSE
col_1_teb_4_LB_1_104596_pUBC-YFP-mod0	wt	3	214	1	TRUE	4:14340349	reverse	4	14340349	LB	LZ156_1	0		2	AA	-9	Col-0	104596	pUBC-YFP-mod0	FALSE
col_1_teb_4_LB_1_104596_pUBC-YFP-mod0	wt	4	382	1	TRUE	4:9366633	reverse	4	9366633	LB	LZ156_1	0		4	TCCT	-1	Col-0	104596	pUBC-YFP-mod0	FALSE
col_1_teb_4_LB_1_104596_pUBC-YFP-mod0	wt	5	291	0.8	TRUE	5:63152	forward	5	63152	LB	LZ156_1	0		4	AAGC	-30	Col-0	104596	pUBC-YFP-mod0	FALSE
col_1_teb_4_LB_1_104596_pUBC-YFP-mod0	wt	9	229	0.888889	TRUE	5:63157	reverse	5	63157	LB	LZ156_1	7	ACAATTC	0		-56	Col-0	104596	pUBC-YFP-mod0	FALSE
col_1_teb_4_LB_1_104596_pUBC-YFP-mod0	wt	37	622	0.945946	TRUE	5:318783	reverse	5	318783	LB	LZ156_1	0		6	TTGTCT	-34	Col-0	104596	pUBC-YFP-mod0	FALSE
col_1_teb_4_LB_1_104596_pUBC-YFP-mod0	wt	5	268	0.8	TRUE	5:508455	forward	5	508455	LB	LZ156_1	0		3	CGT	-28	Col-0	104596	pUBC-YFP-mod0	FALSE
col_1_teb_4_LB_1_104596_pUBC-YFP-mod0	wt	5	212	1	TRUE	5:758276	forward	5	758276	LB	LZ156_1	0		5	AATGT	-49	Col-0	104596	pUBC-YFP-mod0	FALSE
col_1_teb_4_LB_1_104596_pUBC-YFP-mod0	wt	3	200	1	TRUE	5:1109007	forward	5	1109007	LB	LZ156_1	2	GT	0		-25	Col-0	104596	pUBC-YFP-mod0	FALSE
col_1_teb_4_LB_1_104596_pUBC-YFP-mod0	wt	3	204	1	TRUE	5:1519882	reverse	5	1519882	LB	LZ156_1	0		0		-40	Col-0	104596	pUBC-YFP-mod0	FALSE
col_1_teb_4_LB_1_104596_pUBC-YFP-mod0	wt	3	178	1	TRUE	5:1527954	forward	5	1527954	LB	LZ156_1	11	ATCTCCAATAC	0		-57	Col-0	104596	pUBC-YFP-mod0	FALSE
col_1_teb_4_LB_1_104596_pUBC-YFP-mod0	wt	11	229	0.916667	TRUE	5:1586464	reverse	5	1586464	LB	LZ156_1	4	TATA	0		-51	Col-0	104596	pUBC-YFP-mod0	FALSE
col_1_teb_4_LB_1_104596_pUBC-YFP-mod0	wt	3	201	1	TRUE	5:1784211	reverse	5	1784211	LB	LZ156_1	0		4	AGTT	-38	Col-0	104596	pUBC-YFP-mod0	FALSE
col_1_teb_4_LB_1_104596_pUBC-YFP-mod0	wt	3	116	1	TRUE	5:2861675	forward	5	2861675	LB	LZ156_1	10	TTTATTCTGG	0		-36	Col-0	104596	pUBC-YFP-mod0	FALSE
col_1_teb_4_LB_1_104596_pUBC-YFP-mod0	wt	5	276	0.8	TRUE	5:3311676	forward	5	3311676	LB	LZ156_1	0		0		-49	Col-0	104596	pUBC-YFP-mod0	FALSE
col_1_teb_4_LB_1_104596_pUBC-YFP-mod0	wt	3	99	1	TRUE	5:3311739	reverse	5	3311739	LB	LZ156_1	0		1	A	-61	Col-0	104596	pUBC-YFP-mod0	FALSE
col_1_teb_4_LB_1_104596_pUBC-YFP-mod0	wt	17	315	0.888889	TRUE	5:3410103	forward	5	3410103	LB	LZ156_1	0		4	CATT	-66	Col-0	104596	pUBC-YFP-mod0	FALSE
col_1_teb_4_LB_1_104596_pUBC-YFP-mod0	wt	3	258	1	TRUE	5:4226186	reverse	5	4226186	LB	LZ156_1	13	CCGCAATTTGTTT	0		-35	Col-0	104596	pUBC-YFP-mod0	FALSE
col_1_teb_4_LB_1_104596_pUBC-YFP-mod0	wt	13	379	1	TRUE	5:5157533	forward	5	5157533	LB	LZ156_1	0		3	AAG	-40	Col-0	104596	pUBC-YFP-mod0	FALSE
col_1_teb_4_LB_1_104596_pUBC-YFP-mod0	wt	9	350	0.777778	TRUE	5:5583766	forward	5	5583766	LB	LZ156_1	0		4	CGTC	-27	Col-0	104596	pUBC-YFP-mod0	FALSE
col_1_teb_4_LB_1_104596_pUBC-YFP-mod0	wt	5	191	1	TRUE	5:5751286	forward	5	5751286	LB	LZ156_1	0		1	A	-65	Col-0	104596	pUBC-YFP-mod0	FALSE
col_1_teb_4_LB_1_104596_pUBC-YFP-mod0	wt	38	392	0.897436	TRUE	5:6175642	reverse	5	6175642	LB	LZ156_1	0		4	ATGT	-49	Col-0	104596	pUBC-YFP-mod0	FALSE
col_1_teb_4_LB_1_104596_pUBC-YFP-mod0	wt	8	400	1	TRUE	5:7658887	reverse	5	7658887	LB	LZ156_1	1	G	0		-50	Col-0	104596	pUBC-YFP-mod0	FALSE
col_1_teb_4_LB_1_104596_pUBC-YFP-mod0	wt	3	177	1	TRUE	5:7842469	reverse	5	7842469	LB	LZ156_1	0		2	AA	-32	Col-0	104596	pUBC-YFP-mod0	FALSE
col_1_teb_4_LB_1_104596_pUBC-YFP-mod0	wt	7	470	0.857143	TRUE	5:12379209	forward	5	12379209	LB	LZ156_1	0		5	GTCAA	-25	Col-0	104596	pUBC-YFP-mod0	FALSE
col_1_teb_4_LB_1_104596_pUBC-YFP-mod0	wt	4	233	1	TRUE	5:14924753	forward	5	14924753	LB	LZ156_1	0		4	TCAA	-25	Col-0	104596	pUBC-YFP-mod0	FALSE
col_1_teb_4_LB_1_104596_pUBC-YFP-mod0	wt	4	320	1	TRUE	5:15442818	forward	5	15442818	LB	LZ156_1	0		2	TT	-46	Col-0	104596	pUBC-YFP-mod0	FALSE
col_1_teb_4_LB_1_104596_pUBC-YFP-mod0	wt	4	252	1	TRUE	5:16101391	forward	5	16101391	LB	LZ156_1	0		5	TCTAA	-32	Col-0	104596	pUBC-YFP-mod0	FALSE
col_1_teb_4_LB_1_104596_pUBC-YFP-mod0	wt	12	458	0.916667	TRUE	5:16101405	reverse	5	16101405	LB	LZ156_1	4	ACGT	0		-32	Col-0	104596	pUBC-YFP-mod0	FALSE
col_1_teb_4_LB_1_104596_pUBC-YFP-mod0	wt	5	413	1	TRUE	5:16572761	forward	5	16572761	LB	LZ156_1	0		2	AG	-40	Col-0	104596	pUBC-YFP-mod0	FALSE
col_1_teb_4_LB_1_104596_pUBC-YFP-mod0	wt	6	376	0.833333	TRUE	5:16732848	reverse	5	16732848	LB	LZ156_1	0		3	ATT	-23	Col-0	104596	pUBC-YFP-mod0	FALSE
col_1_teb_4_LB_1_104596_pUBC-YFP-mod0	wt	3	308	1	TRUE	5:17285381	reverse	5	17285381	LB	LZ156_1	5	TAACG	0		-28	Col-0	104596	pUBC-YFP-mod0	FALSE
col_1_teb_4_LB_1_104596_pUBC-YFP-mod0	wt	6	349	1	TRUE	5:17613890	reverse	5	17613890	LB	LZ156_1	0		2	GC	-30	Col-0	104596	pUBC-YFP-mod0	FALSE
col_1_teb_4_LB_1_104596_pUBC-YFP-mod0	wt	11	374	1	TRUE	5:17922242	forward	5	17922242	LB	LZ156_1	0		1	G	-31	Col-0	104596	pUBC-YFP-mod0	FALSE
col_1_teb_4_LB_1_104596_pUBC-YFP-mod0	wt	3	212	1	TRUE	5:18461955	reverse	5	18461955	LB	LZ156_1	0		3	GTT	-38	Col-0	104596	pUBC-YFP-mod0	FALSE
col_1_teb_4_LB_1_104596_pUBC-YFP-mod0	wt	3	228	1	TRUE	5:19264003	forward	5	19264003	LB	LZ156_1	0		4	AAGC	-30	Col-0	104596	pUBC-YFP-mod0	FALSE
col_1_teb_4_LB_1_104596_pUBC-YFP-mod0	wt	3	224	1	TRUE	5:19548974	forward	5	19548974	LB	LZ156_1	0		2	TG	-48	Col-0	104596	pUBC-YFP-mod0	FALSE
col_1_teb_4_LB_1_104596_pUBC-YFP-mod0	wt	3	268	1	TRUE	5:19695917	reverse	5	19695917	LB	LZ156_1	3	ATA	0		-51	Col-0	104596	pUBC-YFP-mod0	FALSE
col_1_teb_4_LB_1_104596_pUBC-YFP-mod0	wt	3	165	1	TRUE	5:19748972	reverse	5	19748972	LB	LZ156_1	0		5	TCTAA	-32	Col-0	104596	pUBC-YFP-mod0	FALSE
col_1_teb_4_LB_1_104596_pUBC-YFP-mod0	wt	4	356	1	TRUE	5:19854295	reverse	5	19854295	LB	LZ156_1	0		3	GTG	-48	Col-0	104596	pUBC-YFP-mod0	FALSE
col_1_teb_4_LB_1_104596_pUBC-YFP-mod0	wt	8	439	1	TRUE	5:19944911	reverse	5	19944911	LB	LZ156_1	0		1	A	-25	Col-0	104596	pUBC-YFP-mod0	FALSE
col_1_teb_4_LB_1_104596_pUBC-YFP-mod0	wt	14	407	1	TRUE	5:20705228	reverse	5	20705228	LB	LZ156_1	0		4	CCGC	-54	Col-0	104596	pUBC-YFP-mod0	FALSE
col_1_teb_4_LB_1_104596_pUBC-YFP-mod0	wt	4	120	0.75	TRUE	5:20740480	forward	5	20740480	LB	LZ156_1	1	G	0		-24	Col-0	104596	pUBC-YFP-mod0	FALSE
col_1_teb_4_LB_1_104596_pUBC-YFP-mod0	wt	5	235	1	TRUE	5:21280289	reverse	5	21280289	LB	LZ156_1	0		5	GTTAT	-44	Col-0	104596	pUBC-YFP-mod0	FALSE
col_1_teb_4_LB_1_104596_pUBC-YFP-mod0	wt	6	155	1	TRUE	5:21613975	reverse	5	21613975	LB	LZ156_1	0		3	GTC	-27	Col-0	104596	pUBC-YFP-mod0	FALSE
col_1_teb_4_LB_1_104596_pUBC-YFP-mod0	wt	18	382	0.944444	TRUE	5:21865183	forward	5	21865183	LB	LZ156_1	0		0		-35	Col-0	104596	pUBC-YFP-mod0	FALSE
col_1_teb_4_LB_1_104596_pUBC-YFP-mod0	wt	4	331	1	TRUE	5:22163129	forward	5	22163129	LB	LZ156_1	1	C	0		-27	Col-0	104596	pUBC-YFP-mod0	FALSE
col_1_teb_4_LB_1_104596_pUBC-YFP-mod0	wt	4	253	1	TRUE	5:22318937	forward	5	22318937	LB	LZ156_1	0		1	A	-26	Col-0	104596	pUBC-YFP-mod0	FALSE
col_1_teb_4_LB_1_104596_pUBC-YFP-mod0	wt	10	352	0.9	TRUE	5:22603268	forward	5	22603268	LB	LZ156_1	3	TGT	0		-31	Col-0	104596	pUBC-YFP-mod0	FALSE
col_1_teb_4_LB_1_104596_pUBC-YFP-mod0	wt	4	409	1	TRUE	5:22662197	reverse	5	22662197	LB	LZ156_1	1	A	0		-44	Col-0	104596	pUBC-YFP-mod0	FALSE
col_1_teb_4_LB_1_104596_pUBC-YFP-mod0	wt	5	426	1	TRUE	5:22958640	forward	5	22958640	LB	LZ156_1	0		5	ATGTG	-48	Col-0	104596	pUBC-YFP-mod0	FALSE
col_1_teb_4_LB_1_104596_pUBC-YFP-mod0	wt	3	95	1	TRUE	5:23374706	forward	5	23374706	LB	LZ156_1	0		1	T	-23	Col-0	104596	pUBC-YFP-mod0	FALSE
col_1_teb_4_LB_1_104596_pUBC-YFP-mod0	wt	4	186	1	TRUE	5:23526941	reverse	5	23526941	LB	LZ156_1	2	CA	0		-43	Col-0	104596	pUBC-YFP-mod0	FALSE
col_1_teb_4_LB_1_104596_pUBC-YFP-mod0	wt	4	308	1	TRUE	5:23697545	forward	5	23697545	LB	LZ156_1	0		5	TCAAT	-24	Col-0	104596	pUBC-YFP-mod0	FALSE
col_1_teb_4_LB_1_104596_pUBC-YFP-mod0	wt	4	389	1	TRUE	5:24300032	forward	5	24300032	LB	LZ156_1	0		5	TTGTC	-35	Col-0	104596	pUBC-YFP-mod0	FALSE
col_1_teb_4_LB_1_104596_pUBC-YFP-mod0	wt	3	265	1	TRUE	5:24470324	forward	5	24470324	LB	LZ156_1	0		3	TCA	-26	Col-0	104596	pUBC-YFP-mod0	FALSE
col_1_teb_4_LB_1_104596_pUBC-YFP-mod0	wt	5	148	0.8	TRUE	5:24728797	reverse	5	24728797	LB	LZ156_1	6	ACGAAC	0		-32	Col-0	104596	pUBC-YFP-mod0	FALSE
col_1_teb_4_LB_1_104596_pUBC-YFP-mod0	wt	4	382	1	TRUE	5:24903282	reverse	5	24903282	LB	LZ156_1	0		1	A	-25	Col-0	104596	pUBC-YFP-mod0	FALSE
col_1_teb_4_LB_1_104596_pUBC-YFP-mod0	wt	5	362	1	TRUE	5:25181472	reverse	5	25181472	LB	LZ156_1	0		1	T	-49	Col-0	104596	pUBC-YFP-mod0	FALSE
col_1_teb_4_LB_1_104596_pUBC-YFP-mod0	wt	3	121	1	TRUE	5:25876473	forward	5	25876473	LB	LZ156_1	5	TCATG	0		-36	Col-0	104596	pUBC-YFP-mod0	FALSE
col_1_teb_4_LB_1_104596_pUBC-YFP-mod0	wt	4	196	1	TRUE	5:25907942	forward	5	25907942	LB	LZ156_1	0		3	TTA	-65	Col-0	104596	pUBC-YFP-mod0	FALSE
col_1_teb_4_LB_1_104596_pUBC-YFP-mod0	wt	4	295	0.75	TRUE	5:25926981	forward	5	25926981	LB	LZ156_1	0		1	T	-46	Col-0	104596	pUBC-YFP-mod0	FALSE
col_1_teb_4_LB_1_104596_pUBC-YFP-mod0	wt	9	311	0.888889	TRUE	5:26005942	reverse	5	26005942	LB	LZ156_1	21	TAATGTACCGTAACGTTAATC	0		-46	Col-0	104596	pUBC-YFP-mod0	FALSE
col_1_teb_4_LB_1_104596_pUBC-YFP-mod0	wt	4	219	0.75	TRUE	5:26285060	reverse	5	26285060	LB	LZ156_1	16	TTAAAAACGTCCGCAA	0		-10	Col-0	104596	pUBC-YFP-mod0	FALSE
col_1_teb_4_LB_1_104596_pUBC-YFP-mod0	wt	6	226	0.833333	TRUE	5:26453878	forward	5	26453878	LB	LZ156_1	0		4	TTTG	-21	Col-0	104596	pUBC-YFP-mod0	FALSE
col_1_teb_4_LB_1_104596_pUBC-YFP-mod0	wt	11	417	0.909091	TRUE	5:26525057	forward	5	26525057	LB	LZ156_1	0		0		-25	Col-0	104596	pUBC-YFP-mod0	FALSE
col_1_teb_4_LB_1_104596_pUBC-YFP-mod0	wt	3	509	1	TRUE	5:26696257	forward	5	26696257	LB	LZ156_1	0		1	T	-49	Col-0	104596	pUBC-YFP-mod0	FALSE
col_1_teb_4_LB_1_104596_pUBC-YFP-mod0	wt	8	364	1	TRUE	5:171279	reverse	5	171279	LB	LZ156_1	12	CTAAGCATCACC	0		-20	Col-0	104596	pUBC-YFP-mod0	FALSE
col_1_teb_4_LB_1_104596_pUBC-YFP-mod0	wt	3	323	1	TRUE	5:24853124	reverse	5	24853124	LB	LZ156_1	4	AACG	0		-23	Col-0	104596	pUBC-YFP-mod0	FALSE
col_1_teb_4_LB_1_104596_pUBC-YFP-mod0	wt	78	507	0.884615	TRUE	5:21916727	forward	5	21916727	LB	LZ156_1	4	TCTT	0		-16	Col-0	104596	pUBC-YFP-mod0	FALSE
col_1_teb_4_LB_1_104596_pUBC-YFP-mod0	wt	8	175	0.875	TRUE	5:15954063	forward	5	15954063	LB	LZ156_1	0		4	TTAC	-16	Col-0	104596	pUBC-YFP-mod0	FALSE
col_1_teb_4_LB_1_104596_pUBC-YFP-mod0	wt	3	136	1	TRUE	5:10372956	reverse	5	10372956	LB	LZ156_1	13	CATCACACACAAA	0		-7	Col-0	104596	pUBC-YFP-mod0	FALSE
col_1_teb_4_LB_1_104596_pUBC-YFP-mod0	wt	7	186	1	TRUE	5:17613839	forward	5	17613839	LB	LZ156_1	16	AAGCGACATGTTACTA	0		-5	Col-0	104596	pUBC-YFP-mod0	FALSE
col_1_teb_4_LB_1_104596_pUBC-YFP-mod0	wt	16	222	0.875	TRUE	5:17995020	reverse	5	17995020	LB	LZ156_1	0		0		-22	Col-0	104596	pUBC-YFP-mod0	FALSE
col_1_teb_4_LB_1_104596_pUBC-YFP-mod0	wt	3	163	1	TRUE	5:6472406	reverse	5	6472406	LB	LZ156_1	0		1	A	-9	Col-0	104596	pUBC-YFP-mod0	FALSE
col_1_teb_4_LB_1_104596_pUBC-YFP-mod0	wt	6	490	0.833333	TRUE	5:19336649	forward	5	19336649	LB	LZ156_1	0		3	CTG	0	Col-0	104596	pUBC-YFP-mod0	FALSE
col_1_teb_4_LB_1_104596_pUBC-YFP-mod0	wt	4	285	1	TRUE	5:1998720	forward	5	1998720	LB	LZ156_1	6	AGAGCC	0		-25	Col-0	104596	pUBC-YFP-mod0	FALSE
col_1_teb_4_LB_1_104596_pUBC-YFP-mod0	wt	7	412	0.857143	TRUE	5:21916094	reverse	5	21916094	LB	LZ156_1	0		4	CACC	-13	Col-0	104596	pUBC-YFP-mod0	FALSE
col_1_teb_4_LB_1_104596_pUBC-YFP-mod0	wt	5	287	1	TRUE	5:8319888	reverse	5	8319888	LB	LZ156_1	0		3	TTG	-21	Col-0	104596	pUBC-YFP-mod0	FALSE
col_1_teb_4_LB_1_104596_pUBC-YFP-mod0	wt	5	314	1	TRUE	5:4666023	forward	5	4666023	LB	LZ156_1	0		5	TTACA	-15	Col-0	104596	pUBC-YFP-mod0	FALSE
col_1_teb_4_LB_1_104596_pUBC-YFP-mod0	wt	3	213	1	TRUE	5:21370979	forward	5	21370979	LB	LZ156_1	4	TGTG	0		-4	Col-0	104596	pUBC-YFP-mod0	FALSE
col_1_teb_4_LB_1_104596_pUBC-YFP-mod0	wt	3	448	1	TRUE	5:16054512	forward	5	16054512	LB	LZ156_1	7	TAATCTT	0		-13	Col-0	104596	pUBC-YFP-mod0	FALSE
col_1_teb_4_LB_1_104596_pUBC-YFP-mod0	wt	3	412	1	TRUE	5:9757775	reverse	5	9757775	LB	LZ156_1	8	GTTGACTA	0		-25	Col-0	104596	pUBC-YFP-mod0	FALSE
col_1_teb_4_LB_1_104596_pUBC-YFP-mod0	wt	9	368	0.888889	TRUE	5:8112655	forward	5	8112655	LB	LZ156_1	7	ATTAAGT	0		-9	Col-0	104596	pUBC-YFP-mod0	FALSE
col_1_teb_4_LB_1_104596_pUBC-YFP-mod0	wt	9	412	0.777778	TRUE	5:22533720	forward	5	22533720	LB	LZ156_1	0		2	CA	-15	Col-0	104596	pUBC-YFP-mod0	FALSE
col_1_teb_4_LB_1_104596_pUBC-YFP-mod0	wt	4	260	1	TRUE	5:25746954	reverse	5	25746954	LB	LZ156_1	0		1	A	-10	Col-0	104596	pUBC-YFP-mod0	FALSE
col_1_teb_4_LB_1_104596_pUBC-YFP-mod0	wt	8	349	1	TRUE	5:17995014	forward	5	17995014	LB	LZ156_1	0		1	C	-13	Col-0	104596	pUBC-YFP-mod0	FALSE
col_1_teb_4_LB_1_104596_pUBC-YFP-mod0	wt	5	565	1	TRUE	5:1195479	reverse	5	1195479	LB	LZ156_1	0		3	TTG	-21	Col-0	104596	pUBC-YFP-mod0	FALSE
col_1_teb_4_LB_1_104596_pUBC-YFP-mod0	wt	4	609	1	TRUE	5:23770185	reverse	5	23770185	LB	LZ156_1	0		1	T	-18	Col-0	104596	pUBC-YFP-mod0	FALSE
col_1_teb_4_LB_1_104596_pUBC-YFP-mod0	wt	15	505	0.888889	TRUE	5:18760902	reverse	5	18760902	LB	LZ156_1	0		2	AC	-11	Col-0	104596	pUBC-YFP-mod0	FALSE
col_1_teb_4_LB_1_104596_pUBC-YFP-mod0	wt	9	432	1	TRUE	5:26663153	forward	5	26663153	LB	LZ156_1	0		1	A	-12	Col-0	104596	pUBC-YFP-mod0	FALSE
col_1_teb_4_LB_1_104596_pUBC-YFP-mod0	wt	4	150	1	TRUE	5:6150775	forward	5	6150775	LB	LZ156_1	0		2	AC	-11	Col-0	104596	pUBC-YFP-mod0	FALSE
col_1_teb_4_LB_1_104596_pUBC-YFP-mod0	wt	3	273	1	TRUE	5:8286679	reverse	5	8286679	LB	LZ156_1	9	CACTGCCCG	0		-27	Col-0	104596	pUBC-YFP-mod0	FALSE
col_1_teb_4_LB_1_104596_pUBC-YFP-mod0	wt	12	504	0.833333	TRUE	5:218160	reverse	5	218160	LB	LZ156_1	0		2	CA	-12	Col-0	104596	pUBC-YFP-mod0	FALSE
col_1_teb_4_LB_1_104596_pUBC-YFP-mod0	wt	4	394	0.75	TRUE	5:18058949	forward	5	18058949	LB	LZ156_1	1	G	0		0	Col-0	104596	pUBC-YFP-mod0	FALSE
col_1_teb_4_LB_1_104596_pUBC-YFP-mod0	wt	3	391	1	TRUE	5:7934504	reverse	5	7934504	LB	LZ156_1	0		5	TGTTT	-18	Col-0	104596	pUBC-YFP-mod0	FALSE
col_1_teb_4_LB_1_104596_pUBC-YFP-mod0	wt	3	335	1	TRUE	5:26165968	forward	5	26165968	LB	LZ156_1	5	ATATA	0		1	Col-0	104596	pUBC-YFP-mod0	FALSE
col_1_teb_4_LB_1_104596_pUBC-YFP-mod0	wt	6	347	0.833333	TRUE	5:21695329	forward	5	21695329	LB	LZ156_1	0		4	ATAT	-6	Col-0	104596	pUBC-YFP-mod0	FALSE
col_1_teb_4_LB_1_104596_pUBC-YFP-mod0	wt	3	176	1	TRUE	5:204722	reverse	5	204722	LB	LZ156_1	22	GAAGCACATACGTCAGAAACCA	0		0	Col-0	104596	pUBC-YFP-mod0	FALSE
col_1_teb_4_LB_1_104596_pUBC-YFP-mod0	wt	3	205	0.75	TRUE	5:503330	forward	5	503330	LB	LZ156_1	0		3	TTT	-18	Col-0	104596	pUBC-YFP-mod0	FALSE
col_1_teb_4_LB_1_104596_pUBC-YFP-mod0	wt	7	346	0.857143	TRUE	5:204669	forward	5	204669	LB	LZ156_1	4	CCGT	0		-16	Col-0	104596	pUBC-YFP-mod0	FALSE
col_1_teb_4_LB_1_104596_pUBC-YFP-mod0	wt	4	198	1	TRUE	5:26385210	reverse	5	26385210	LB	LZ156_1	15	TTACCATACCACAAA	0		-11	Col-0	104596	pUBC-YFP-mod0	FALSE
col_1_teb_4_LB_1_104596_pUBC-YFP-mod0	wt	5	528	0.8	TRUE	5:4552928	forward	5	4552928	LB	LZ156_1	0		4	CTGC	1	Col-0	104596	pUBC-YFP-mod0	FALSE
col_1_teb_4_LB_1_104596_pUBC-YFP-mod0	wt	4	110	1	TRUE	5:7825102	forward	5	7825102	LB	LZ156_1	0		0		-6	Col-0	104596	pUBC-YFP-mod0	FALSE
col_1_teb_4_LB_1_104596_pUBC-YFP-mod0	wt	3	227	1	TRUE	5:23883388	forward	5	23883388	LB	LZ156_1	29	GTTGTCCGCAATGGTCTAAACGTCCACCA	0		-25	Col-0	104596	pUBC-YFP-mod0	FALSE
col_1_teb_4_LB_1_104596_pUBC-YFP-mod0	wt	3	286	1	TRUE	5:24470333	reverse	5	24470333	LB	LZ156_1	3	AAC	0		-5	Col-0	104596	pUBC-YFP-mod0	FALSE
col_1_teb_4_LB_1_104596_pUBC-YFP-mod0	wt	8	499	0.875	TRUE	5:2825711	reverse	5	2825711	LB	LZ156_1	0		3	TTG	-21	Col-0	104596	pUBC-YFP-mod0	FALSE
col_1_teb_4_LB_1_104596_pUBC-YFP-mod0	wt	4	255	0.75	TRUE	5:1437726	reverse	5	1437726	LB	LZ156_1	18	GTTTTTATGATAAGTCCG	0		-10	Col-0	104596	pUBC-YFP-mod0	FALSE
col_1_teb_4_LB_1_104596_pUBC-YFP-mod0	wt	4	377	0.75	TRUE	5:16781946	reverse	5	16781946	LB	LZ156_1	0		4	CAAT	-8	Col-0	104596	pUBC-YFP-mod0	FALSE
col_1_teb_4_LB_1_104596_pUBC-YFP-mod0	wt	9	349	0.888889	TRUE	5:16579577	forward	5	16579577	LB	LZ156_1	0		3	ACC	-13	Col-0	104596	pUBC-YFP-mod0	FALSE
col_1_teb_4_LB_1_104596_pUBC-YFP-mod0	wt	3	244	1	TRUE	5:7825107	forward	5	7825107	LB	LZ156_1	0		3	AAT	-8	Col-0	104596	pUBC-YFP-mod0	FALSE
col_1_teb_4_LB_1_104596_pUBC-YFP-mod0	wt	3	354	1	TRUE	5:20166718	forward	5	20166718	LB	LZ156_1	0		10	TTTGTTTACA	-15	Col-0	104596	pUBC-YFP-mod0	FALSE
col_1_teb_4_LB_1_104596_pUBC-YFP-mod0	wt	4	337	1	TRUE	5:9165516	forward	5	9165516	LB	LZ156_1	0		4	CCAC	-11	Col-0	104596	pUBC-YFP-mod0	FALSE
col_1_teb_4_LB_1_104596_pUBC-YFP-mod0	wt	6	185	1	TRUE	5:24319801	forward	5	24319801	LB	LZ156_1	2	CA	0		-19	Col-0	104596	pUBC-YFP-mod0	FALSE
col_1_teb_4_LB_1_104596_pUBC-YFP-mod0	wt	5	163	0.8	TRUE	5:4024238	forward	5	4024238	LB	LZ156_1	8	AGACAATT	0		-15	Col-0	104596	pUBC-YFP-mod0	FALSE
col_1_teb_4_LB_1_104596_pUBC-YFP-mod0	wt	3	421	1	TRUE	5:6472406	forward	5	6472406	LB	LZ156_1	14	ACACAATAACACAT	0		-7	Col-0	104596	pUBC-YFP-mod0	FALSE
col_1_teb_4_LB_1_104596_pUBC-YFP-mod0	wt	3	228	1	TRUE	5:221594	forward	5	221594	LB	LZ156_1	34	GTTTTCAGTACATTAAAAACGTCCGCAATGTGTT	0		-28	Col-0	104596	pUBC-YFP-mod0	FALSE
col_1_teb_4_LB_1_104596_pUBC-YFP-mod0	wt	3	321	1	TRUE	5:21485397	forward	5	21485397	LB	LZ156_1	0		2	CT	-1	Col-0	104596	pUBC-YFP-mod0	FALSE
col_1_teb_4_LB_1_104596_pUBC-YFP-mod0	wt	3	225	1	TRUE	5:7217007	reverse	5	7217007	LB	LZ156_1	20	AAACAACAGTTATTAAGTTG	0		0	Col-0	104596	pUBC-YFP-mod0	FALSE
col_1_teb_4_LB_1_104596_pUBC-YFP-mod0	wt	6	465	1	TRUE	5:21293189	reverse	5	21293189	LB	LZ156_1	5	TATAT	0		-1	Col-0	104596	pUBC-YFP-mod0	FALSE
col_1_teb_4_LB_1_104596_pUBC-YFP-mod0	wt	3	300	1	TRUE	5:19246878	reverse	5	19246878	LB	LZ156_1	30	CTAAGCATAGTGTTTAAACTATCATGTCTC	0		-20	Col-0	104596	pUBC-YFP-mod0	FALSE
col_1_teb_4_LB_1_104596_pUBC-YFP-mod0	wt	3	177	1	TRUE	5:19246852	forward	5	19246852	LB	LZ156_1	12	TAAACAAATCAA	0		0	Col-0	104596	pUBC-YFP-mod0	FALSE
col_1_teb_4_LB_1_104596_pUBC-YFP-mod0	wt	4	156	1	TRUE	5:16054549	reverse	5	16054549	LB	LZ156_1	0		2	AT	-6	Col-0	104596	pUBC-YFP-mod0	FALSE
col_1_teb_4_LB_1_104596_pUBC-YFP-mod0	wt	3	173	1	TRUE	5:4024255	reverse	5	4024255	LB	LZ156_1	0		3	TTT	-18	Col-0	104596	pUBC-YFP-mod0	FALSE
col_1_teb_4_LB_1_104596_pUBC-YFP-mod0	wt	5	183	0.8	TRUE	5:1414681	forward	5	1414681	LB	LZ156_1	0		4	ACAA	-9	Col-0	104596	pUBC-YFP-mod0	FALSE
col_1_teb_4_LB_1_104596_pUBC-YFP-mod0	wt	10	352	0.8	TRUE	5:24039048	forward	5	24039048	LB	LZ156_1	0		3	CCT	-1	Col-0	104596	pUBC-YFP-mod0	FALSE
col_1_teb_4_LB_1_104596_pUBC-YFP-mod0	wt	5	232	0.8	TRUE	Mt:185874	forward	Mt	185874	LB	LZ156_1	0		1	G	0	Col-0	104596	pUBC-YFP-mod0	FALSE
col_1_teb_4_LB_4_104596_pUBC-YFP-mod2	teb	8	286	1	TRUE	2:8522603	reverse	2	8522603	LB	LZ157_6	0		2	TC	-41	Col-0	104596	pUBC-YFP-mod2	FALSE
col_1_teb_4_LB_4_104596_pUBC-YFP-mod2	teb	11	211	0.916667	TRUE	4:7663753	forward	4	7663753	LB	LZ157_6	0		0		-49	Col-0	104596	pUBC-YFP-mod2	FALSE
col_1_teb_4_LB_4_104596_pUBC-YFP-mod2	teb	8	289	0.875	TRUE	5:7519336	reverse	5	7519336	LB	LZ157_6	1	A	0		-31	Col-0	104596	pUBC-YFP-mod2	FALSE
col_1_teb_4_LB_1_104596_pUBC-YFP-mod0	wt	59	528	0.929577	TRUE	3:1123727	reverse	3	1123727	LB	LZ156_1	0		5	ACAAT	-8	Col-0	104596	pUBC-YFP-mod0	TRUE
col_1_teb_4_LB_1_104596_pUBC-YFP-mod0	wt	27	407	0.928571	TRUE	3:20773273	reverse	3	20773273	LB	LZ156_1	12	ATGCTTAGACAA	0		-9	Col-0	104596	pUBC-YFP-mod0	TRUE
col_1_teb_4_LB_1_104596_pUBC-YFP-mod0	wt	11	371	0.818182	TRUE	3:3185041	forward	3	3185041	LB	LZ156_1	5	TCAGT	0		-6	Col-0	104596	pUBC-YFP-mod0	TRUE
col_1_teb_4_LB_1_104596_pUBC-YFP-mod0	wt	11	320	0.909091	TRUE	3:3366591	reverse	3	3366591	LB	LZ156_1	5	TGTAC	0		-4	Col-0	104596	pUBC-YFP-mod0	TRUE
col_1_teb_4_LB_1_104596_pUBC-YFP-mod0	wt	29	416	0.931034	TRUE	3:4507606	forward	3	4507606	LB	LZ156_1	8	TATATTTA	0		-11	Col-0	104596	pUBC-YFP-mod0	TRUE
col_1_teb_4_LB_1_104596_pUBC-YFP-mod0	wt	15	529	0.933333	TRUE	3:9600512	forward	3	9600512	LB	LZ156_1	15	GTGATTTTAAGTACA	0		0	Col-0	104596	pUBC-YFP-mod0	TRUE
col_1_teb_4_LB_1_104596_pUBC-YFP-mod0	wt	24	378	0.958333	TRUE	4:10974694	reverse	4	10974694	LB	LZ156_1	10	TGGTGTAAAC	0		0	Col-0	104596	pUBC-YFP-mod0	TRUE
col_1_teb_4_LB_1_104596_pUBC-YFP-mod0	wt	17	361	0.961538	TRUE	5:18760908	reverse	5	18760908	LB	LZ156_1	2	CT	0		-9	Col-0	104596	pUBC-YFP-mod0	TRUE
col_1_teb_4_LB_1_104596_pUBC-YFP-mod0	wt	21	302	1	TRUE	5:18778311	forward	5	18778311	LB	LZ156_1	3	TTT	0		-8	Col-0	104596	pUBC-YFP-mod0	TRUE
col_1_teb_4_RB_1_104596_pUBC-YFP-mod0	wt	6	362	1	TRUE	1:979527	forward	1	979527	RB	LZ156_1	0		9	GTGTTTGAC	1	Col-0	104596	pUBC-YFP-mod0	FALSE
col_1_teb_4_RB_1_104596_pUBC-YFP-mod0	wt	3	207	1	TRUE	1:1331296	forward	1	1331296	RB	LZ156_1	0		0		0	Col-0	104596	pUBC-YFP-mod0	FALSE
col_1_teb_4_RB_1_104596_pUBC-YFP-mod0	wt	3	251	1	TRUE	1:2203639	forward	1	2203639	RB	LZ156_1	0		0		0	Col-0	104596	pUBC-YFP-mod0	FALSE
col_1_teb_4_RB_1_104596_pUBC-YFP-mod0	wt	7	135	1	TRUE	1:3298516	reverse	1	3298516	RB	LZ156_1	0		1	A	0	Col-0	104596	pUBC-YFP-mod0	FALSE
col_1_teb_4_RB_1_104596_pUBC-YFP-mod0	wt	9	385	1	TRUE	1:4307577	forward	1	4307577	RB	LZ156_1	27	AAAAGAAGCGATCAACGTGGGCGGCCA	0		-2	Col-0	104596	pUBC-YFP-mod0	FALSE
col_1_teb_4_RB_1_104596_pUBC-YFP-mod0	wt	13	323	0.923077	TRUE	1:4319513	reverse	1	4319513	RB	LZ156_1	13	TAACATCCGCAAT	0		0	Col-0	104596	pUBC-YFP-mod0	FALSE
col_1_teb_4_RB_1_104596_pUBC-YFP-mod0	wt	3	310	1	TRUE	1:6125671	forward	1	6125671	RB	LZ156_1	0		0		-5	Col-0	104596	pUBC-YFP-mod0	FALSE
col_1_teb_4_RB_1_104596_pUBC-YFP-mod0	wt	3	131	1	TRUE	1:6526519	forward	1	6526519	RB	LZ156_1	0		6	CCTTCA	-21	Col-0	104596	pUBC-YFP-mod0	FALSE
col_1_teb_4_RB_1_104596_pUBC-YFP-mod0	wt	10	300	1	TRUE	1:6883264	reverse	1	6883264	RB	LZ156_1	0		1	A	0	Col-0	104596	pUBC-YFP-mod0	FALSE
col_1_teb_4_RB_1_104596_pUBC-YFP-mod0	wt	3	497	1	TRUE	1:6885557	forward	1	6885557	RB	LZ156_1	4	CGTA	0		-1	Col-0	104596	pUBC-YFP-mod0	FALSE
col_1_teb_4_RB_1_104596_pUBC-YFP-mod0	wt	9	478	1	TRUE	1:7589062	forward	1	7589062	RB	LZ156_1	0		1	A	0	Col-0	104596	pUBC-YFP-mod0	FALSE
col_1_teb_4_RB_1_104596_pUBC-YFP-mod0	wt	3	205	1	TRUE	1:7699971	forward	1	7699971	RB	LZ156_1	0		1	A	0	Col-0	104596	pUBC-YFP-mod0	FALSE
col_1_teb_4_RB_1_104596_pUBC-YFP-mod0	wt	3	170	1	TRUE	1:7955765	forward	1	7955765	RB	LZ156_1	0		2	TG	-1	Col-0	104596	pUBC-YFP-mod0	FALSE
col_1_teb_4_RB_1_104596_pUBC-YFP-mod0	wt	3	217	1	TRUE	1:8067630	reverse	1	8067630	RB	LZ156_1	7	ATAGTTG	0		0	Col-0	104596	pUBC-YFP-mod0	FALSE
col_1_teb_4_RB_1_104596_pUBC-YFP-mod0	wt	4	235	1	TRUE	1:8307252	forward	1	8307252	RB	LZ156_1	16	ACTGCTATTGTGGTTA	0		0	Col-0	104596	pUBC-YFP-mod0	FALSE
col_1_teb_4_RB_1_104596_pUBC-YFP-mod0	wt	5	233	1	TRUE	1:9394948	reverse	1	9394948	RB	LZ156_1	0		0		0	Col-0	104596	pUBC-YFP-mod0	FALSE
col_1_teb_4_RB_1_104596_pUBC-YFP-mod0	wt	3	120	1	TRUE	1:11416445	reverse	1	11416445	RB	LZ156_1	10	ACTATCAGTG	0		0	Col-0	104596	pUBC-YFP-mod0	FALSE
col_1_teb_4_RB_1_104596_pUBC-YFP-mod0	wt	5	233	1	TRUE	1:11646768	reverse	1	11646768	RB	LZ156_1	5	CAGTA	0		-13	Col-0	104596	pUBC-YFP-mod0	FALSE
col_1_teb_4_RB_1_104596_pUBC-YFP-mod0	wt	5	363	1	TRUE	1:12099326	reverse	1	12099326	RB	LZ156_1	3	AAA	0		0	Col-0	104596	pUBC-YFP-mod0	FALSE
col_1_teb_4_RB_1_104596_pUBC-YFP-mod0	wt	3	143	1	TRUE	1:13281923	reverse	1	13281923	RB	LZ156_1	3	CGA	0		1	Col-0	104596	pUBC-YFP-mod0	FALSE
col_1_teb_4_RB_1_104596_pUBC-YFP-mod0	wt	7	223	0.857143	TRUE	1:17236151	forward	1	17236151	RB	LZ156_1	15	TCGACTTGAAGAACT	0		0	Col-0	104596	pUBC-YFP-mod0	FALSE
col_1_teb_4_RB_1_104596_pUBC-YFP-mod0	wt	47	444	0.93617	TRUE	1:18348079	forward	1	18348079	RB	LZ156_1	0		4	TTGA	0	Col-0	104596	pUBC-YFP-mod0	FALSE
col_1_teb_4_RB_1_104596_pUBC-YFP-mod0	wt	19	324	0.894737	TRUE	1:18348078	reverse	1	18348078	RB	LZ156_1	0		1	A	0	Col-0	104596	pUBC-YFP-mod0	FALSE
col_1_teb_4_RB_1_104596_pUBC-YFP-mod0	wt	4	428	1	TRUE	1:19132061	forward	1	19132061	RB	LZ156_1	1	A	0		0	Col-0	104596	pUBC-YFP-mod0	FALSE
col_1_teb_4_RB_1_104596_pUBC-YFP-mod0	wt	4	146	0.75	TRUE	1:19841852	forward	1	19841852	RB	LZ156_1	0		3	ATC	-9	Col-0	104596	pUBC-YFP-mod0	FALSE
col_1_teb_4_RB_1_104596_pUBC-YFP-mod0	wt	3	168	1	TRUE	1:22372348	reverse	1	22372348	RB	LZ156_1	0		3	TGA	0	Col-0	104596	pUBC-YFP-mod0	FALSE
col_1_teb_4_RB_1_104596_pUBC-YFP-mod0	wt	4	131	1	TRUE	1:23338249	reverse	1	23338249	RB	LZ156_1	0		1	T	-10	Col-0	104596	pUBC-YFP-mod0	FALSE
col_1_teb_4_RB_1_104596_pUBC-YFP-mod0	wt	5	257	1	TRUE	1:23916766	reverse	1	23916766	RB	LZ156_1	14	AGCGGTAATGTGTT	0		-11	Col-0	104596	pUBC-YFP-mod0	FALSE
col_1_teb_4_RB_1_104596_pUBC-YFP-mod0	wt	3	339	1	TRUE	1:25766953	forward	1	25766953	RB	LZ156_1	31	GATGGACGGTTTGCGTGTTTGAGTCGGAAAA	0		0	Col-0	104596	pUBC-YFP-mod0	FALSE
col_1_teb_4_RB_1_104596_pUBC-YFP-mod0	wt	5	338	0.8	TRUE	1:26277316	reverse	1	26277316	RB	LZ156_1	0		2	AC	1	Col-0	104596	pUBC-YFP-mod0	FALSE
col_1_teb_4_RB_1_104596_pUBC-YFP-mod0	wt	5	193	1	TRUE	1:26630972	forward	1	26630972	RB	LZ156_1	0		2	AC	1	Col-0	104596	pUBC-YFP-mod0	FALSE
col_1_teb_4_RB_1_104596_pUBC-YFP-mod0	wt	9	171	1	TRUE	1:26631000	reverse	1	26631000	RB	LZ156_1	0		0		0	Col-0	104596	pUBC-YFP-mod0	FALSE
col_1_teb_4_RB_1_104596_pUBC-YFP-mod0	wt	6	187	1	TRUE	1:27077331	reverse	1	27077331	RB	LZ156_1	4	AATT	0		0	Col-0	104596	pUBC-YFP-mod0	FALSE
col_1_teb_4_RB_1_104596_pUBC-YFP-mod0	wt	3	223	1	TRUE	1:27152052	reverse	1	27152052	RB	LZ156_1	0		2	CA	-8	Col-0	104596	pUBC-YFP-mod0	FALSE
col_1_teb_4_RB_1_104596_pUBC-YFP-mod0	wt	6	225	0.833333	TRUE	1:27220289	forward	1	27220289	RB	LZ156_1	1	T	0		0	Col-0	104596	pUBC-YFP-mod0	FALSE
col_1_teb_4_RB_1_104596_pUBC-YFP-mod0	wt	10	286	0.8	TRUE	1:27233079	forward	1	27233079	RB	LZ156_1	26	AATTGGGCCCTAAAAAGGTCGGTAAT	0		-2	Col-0	104596	pUBC-YFP-mod0	FALSE
col_1_teb_4_RB_1_104596_pUBC-YFP-mod0	wt	9	297	1	TRUE	1:27896489	forward	1	27896489	RB	LZ156_1	0		6	GTTTGA	0	Col-0	104596	pUBC-YFP-mod0	FALSE
col_1_teb_4_RB_1_104596_pUBC-YFP-mod0	wt	4	195	0.75	TRUE	1:28967628	reverse	1	28967628	RB	LZ156_1	7	TAAGCGT	0		0	Col-0	104596	pUBC-YFP-mod0	FALSE
col_1_teb_4_RB_1_104596_pUBC-YFP-mod0	wt	4	270	1	TRUE	1:29340789	forward	1	29340789	RB	LZ156_1	0		2	GA	0	Col-0	104596	pUBC-YFP-mod0	FALSE
col_1_teb_4_RB_1_104596_pUBC-YFP-mod0	wt	3	307	1	TRUE	1:29899073	forward	1	29899073	RB	LZ156_1	0		5	TTTGA	0	Col-0	104596	pUBC-YFP-mod0	FALSE
col_1_teb_4_RB_1_104596_pUBC-YFP-mod0	wt	3	163	1	TRUE	1:29905507	forward	1	29905507	RB	LZ156_1	0		3	GAC	1	Col-0	104596	pUBC-YFP-mod0	FALSE
col_1_teb_4_RB_1_104596_pUBC-YFP-mod0	wt	8	313	1	TRUE	1:30338840	reverse	1	30338840	RB	LZ156_1	0		1	A	0	Col-0	104596	pUBC-YFP-mod0	FALSE
col_1_teb_4_RB_1_104596_pUBC-YFP-mod0	wt	5	236	1	TRUE	1:30338846	reverse	1	30338846	RB	LZ156_1	5	TCAAA	0		0	Col-0	104596	pUBC-YFP-mod0	FALSE
col_1_teb_4_RB_1_104596_pUBC-YFP-mod0	wt	4	228	1	TRUE	1:30369964	forward	1	30369964	RB	LZ156_1	8	ATTTGTGT	0		0	Col-0	104596	pUBC-YFP-mod0	FALSE
col_1_teb_4_RB_1_104596_pUBC-YFP-mod0	wt	6	197	1	TRUE	1:8119624	reverse	1	8119624	RB	LZ156_1	0		0		0	Col-0	104596	pUBC-YFP-mod0	FALSE
col_1_teb_4_RB_1_104596_pUBC-YFP-mod0	wt	5	215	1	TRUE	1:29122424	reverse	1	29122424	RB	LZ156_1	44	GTACAATTCGGTAACGCTGATAGTTATTAGTCGGCAATTTCACT	0		0	Col-0	104596	pUBC-YFP-mod0	FALSE
col_1_teb_4_RB_1_104596_pUBC-YFP-mod0	wt	3	144	1	TRUE	1:25050938	reverse	1	25050938	RB	LZ156_1	47	ACCGGTAAGGTCAGGAAGGTAAGAGAGAGTCTCAAACTTCTTCTTTC	0		-3	Col-0	104596	pUBC-YFP-mod0	FALSE
col_1_teb_4_RB_1_104596_pUBC-YFP-mod0	wt	4	330	0.8	TRUE	2:584064	forward	2	584064	RB	LZ156_1	0		1	A	-8	Col-0	104596	pUBC-YFP-mod0	FALSE
col_1_teb_4_RB_1_104596_pUBC-YFP-mod0	wt	25	425	1	TRUE	2:2144563	forward	2	2144563	RB	LZ156_1	0		2	GA	0	Col-0	104596	pUBC-YFP-mod0	FALSE
col_1_teb_4_RB_1_104596_pUBC-YFP-mod0	wt	35	391	0.942857	TRUE	2:3057842	reverse	2	3057842	RB	LZ156_1	12	TGTTACATTAAC	0		-1	Col-0	104596	pUBC-YFP-mod0	FALSE
col_1_teb_4_RB_1_104596_pUBC-YFP-mod0	wt	11	293	1	TRUE	2:5916763	forward	2	5916763	RB	LZ156_1	0		2	GA	0	Col-0	104596	pUBC-YFP-mod0	FALSE
col_1_teb_4_RB_1_104596_pUBC-YFP-mod0	wt	3	259	1	TRUE	2:8853144	forward	2	8853144	RB	LZ156_1	2	GT	0		-5	Col-0	104596	pUBC-YFP-mod0	FALSE
col_1_teb_4_RB_1_104596_pUBC-YFP-mod0	wt	10	431	1	TRUE	2:9452496	reverse	2	9452496	RB	LZ156_1	6	CCTAAT	0		-5	Col-0	104596	pUBC-YFP-mod0	FALSE
col_1_teb_4_RB_1_104596_pUBC-YFP-mod0	wt	3	236	1	TRUE	2:9909084	forward	2	9909084	RB	LZ156_1	3	TTT	0		-6	Col-0	104596	pUBC-YFP-mod0	FALSE
col_1_teb_4_RB_1_104596_pUBC-YFP-mod0	wt	7	204	1	TRUE	2:10382173	reverse	2	10382173	RB	LZ156_1	0		1	A	0	Col-0	104596	pUBC-YFP-mod0	FALSE
col_1_teb_4_RB_1_104596_pUBC-YFP-mod0	wt	7	208	1	TRUE	2:10428116	forward	2	10428116	RB	LZ156_1	0		1	C	-26	Col-0	104596	pUBC-YFP-mod0	FALSE
col_1_teb_4_RB_1_104596_pUBC-YFP-mod0	wt	6	328	1	TRUE	2:10847870	reverse	2	10847870	RB	LZ156_1	0		2	GA	0	Col-0	104596	pUBC-YFP-mod0	FALSE
col_1_teb_4_RB_1_104596_pUBC-YFP-mod0	wt	4	116	1	TRUE	2:12108378	reverse	2	12108378	RB	LZ156_1	28	GTTTTAGTTTCCCGACACTGTTGATCCA	0		1	Col-0	104596	pUBC-YFP-mod0	FALSE
col_1_teb_4_RB_1_104596_pUBC-YFP-mod0	wt	6	546	1	TRUE	2:12650386	forward	2	12650386	RB	LZ156_1	18	AGAAGAACGAGCCTGAAG	0		0	Col-0	104596	pUBC-YFP-mod0	FALSE
col_1_teb_4_RB_1_104596_pUBC-YFP-mod0	wt	4	260	0.75	TRUE	2:12680341	reverse	2	12680341	RB	LZ156_1	0		0		0	Col-0	104596	pUBC-YFP-mod0	FALSE
col_1_teb_4_RB_1_104596_pUBC-YFP-mod0	wt	9	417	1	TRUE	2:13556804	forward	2	13556804	RB	LZ156_1	0		2	TG	-1	Col-0	104596	pUBC-YFP-mod0	FALSE
col_1_teb_4_RB_1_104596_pUBC-YFP-mod0	wt	3	199	1	TRUE	2:14074682	forward	2	14074682	RB	LZ156_1	0		2	GA	0	Col-0	104596	pUBC-YFP-mod0	FALSE
col_1_teb_4_RB_1_104596_pUBC-YFP-mod0	wt	7	294	1	TRUE	2:14483195	forward	2	14483195	RB	LZ156_1	0		4	CTTC	-22	Col-0	104596	pUBC-YFP-mod0	FALSE
col_1_teb_4_RB_1_104596_pUBC-YFP-mod0	wt	3	140	1	TRUE	2:15116634	forward	2	15116634	RB	LZ156_1	17	TTTGCGCAAAATTTATC	0		-16	Col-0	104596	pUBC-YFP-mod0	FALSE
col_1_teb_4_RB_1_104596_pUBC-YFP-mod0	wt	5	181	0.8	TRUE	2:15469955	reverse	2	15469955	RB	LZ156_1	14	AATATAACTGTCGT	0		0	Col-0	104596	pUBC-YFP-mod0	FALSE
col_1_teb_4_RB_1_104596_pUBC-YFP-mod0	wt	6	294	0.833333	TRUE	2:16051998	reverse	2	16051998	RB	LZ156_1	0		0		0	Col-0	104596	pUBC-YFP-mod0	FALSE
col_1_teb_4_RB_1_104596_pUBC-YFP-mod0	wt	3	252	1	TRUE	2:16346588	forward	2	16346588	RB	LZ156_1	0		4	CTTC	-22	Col-0	104596	pUBC-YFP-mod0	FALSE
col_1_teb_4_RB_1_104596_pUBC-YFP-mod0	wt	8	449	0.75	TRUE	2:17121002	forward	2	17121002	RB	LZ156_1	0		1	A	0	Col-0	104596	pUBC-YFP-mod0	FALSE
col_1_teb_4_RB_1_104596_pUBC-YFP-mod0	wt	6	165	0.833333	TRUE	2:18487212	reverse	2	18487212	RB	LZ156_1	4	AAAA	0		2	Col-0	104596	pUBC-YFP-mod0	FALSE
col_1_teb_4_RB_1_104596_pUBC-YFP-mod0	wt	3	357	1	TRUE	2:18584674	reverse	2	18584674	RB	LZ156_1	62	CGTCCTCGTCCGTCTAGAGCAATGTCTTGGTGGCTAGAGCAGCTTGAGCTTGGATCAGATTA	0		-6	Col-0	104596	pUBC-YFP-mod0	FALSE
col_1_teb_4_RB_1_104596_pUBC-YFP-mod0	wt	4	262	1	TRUE	3:486830	reverse	3	486830	RB	LZ156_1	0		0		0	Col-0	104596	pUBC-YFP-mod0	FALSE
col_1_teb_4_RB_1_104596_pUBC-YFP-mod0	wt	5	348	1	TRUE	3:1046850	reverse	3	1046850	RB	LZ156_1	0		1	A	2	Col-0	104596	pUBC-YFP-mod0	FALSE
col_1_teb_4_RB_1_104596_pUBC-YFP-mod0	wt	7	144	0.857143	TRUE	3:1064471	reverse	3	1064471	RB	LZ156_1	35	TGCCGGTCAAATTTGTTGTTTATCGACCGGCATGC	0		-8	Col-0	104596	pUBC-YFP-mod0	FALSE
col_1_teb_4_RB_1_104596_pUBC-YFP-mod0	wt	4	149	1	TRUE	3:1535948	forward	3	1535948	RB	LZ156_1	0		3	ACA	2	Col-0	104596	pUBC-YFP-mod0	FALSE
col_1_teb_4_RB_1_104596_pUBC-YFP-mod0	wt	3	246	1	TRUE	3:1810699	reverse	3	1810699	RB	LZ156_1	7	TCAAATA	0		-6	Col-0	104596	pUBC-YFP-mod0	FALSE
col_1_teb_4_RB_1_104596_pUBC-YFP-mod0	wt	8	336	0.875	TRUE	3:3185067	reverse	3	3185067	RB	LZ156_1	0		5	TTTGA	0	Col-0	104596	pUBC-YFP-mod0	FALSE
col_1_teb_4_RB_1_104596_pUBC-YFP-mod0	wt	5	300	1	TRUE	3:4399180	reverse	3	4399180	RB	LZ156_1	14	TCTGCGGAGGGTTT	0		-15	Col-0	104596	pUBC-YFP-mod0	FALSE
col_1_teb_4_RB_1_104596_pUBC-YFP-mod0	wt	5	416	0.8	TRUE	3:4751441	forward	3	4751441	RB	LZ156_1	17	TATTGTGGTGCTTGAAG	0		-8	Col-0	104596	pUBC-YFP-mod0	FALSE
col_1_teb_4_RB_1_104596_pUBC-YFP-mod0	wt	3	309	1	TRUE	3:5004206	reverse	3	5004206	RB	LZ156_1	0		0		0	Col-0	104596	pUBC-YFP-mod0	FALSE
col_1_teb_4_RB_1_104596_pUBC-YFP-mod0	wt	3	155	1	TRUE	3:6772508	reverse	3	6772508	RB	LZ156_1	0		0		-1	Col-0	104596	pUBC-YFP-mod0	FALSE
col_1_teb_4_RB_1_104596_pUBC-YFP-mod0	wt	5	459	1	TRUE	3:7238793	reverse	3	7238793	RB	LZ156_1	0		3	GAC	1	Col-0	104596	pUBC-YFP-mod0	FALSE
col_1_teb_4_RB_1_104596_pUBC-YFP-mod0	wt	6	191	1	TRUE	3:7385093	forward	3	7385093	RB	LZ156_1	5	AGAAT	0		0	Col-0	104596	pUBC-YFP-mod0	FALSE
col_1_teb_4_RB_1_104596_pUBC-YFP-mod0	wt	4	212	1	TRUE	3:7816987	forward	3	7816987	RB	LZ156_1	0		1	A	0	Col-0	104596	pUBC-YFP-mod0	FALSE
col_1_teb_4_RB_1_104596_pUBC-YFP-mod0	wt	5	272	0.8	TRUE	3:8266873	forward	3	8266873	RB	LZ156_1	0		4	TTGA	0	Col-0	104596	pUBC-YFP-mod0	FALSE
col_1_teb_4_RB_1_104596_pUBC-YFP-mod0	wt	3	123	1	TRUE	3:8438399	reverse	3	8438399	RB	LZ156_1	2	TG	0		-8	Col-0	104596	pUBC-YFP-mod0	FALSE
col_1_teb_4_RB_1_104596_pUBC-YFP-mod0	wt	6	213	1	TRUE	3:8747654	reverse	3	8747654	RB	LZ156_1	12	CAGTGTTGCCTT	0		-22	Col-0	104596	pUBC-YFP-mod0	FALSE
col_1_teb_4_RB_1_104596_pUBC-YFP-mod0	wt	4	172	0.8	TRUE	3:8920286	forward	3	8920286	RB	LZ156_1	0		1	A	0	Col-0	104596	pUBC-YFP-mod0	FALSE
col_1_teb_4_RB_1_104596_pUBC-YFP-mod0	wt	5	188	1	TRUE	3:9758658	forward	3	9758658	RB	LZ156_1	0		2	AG	-7	Col-0	104596	pUBC-YFP-mod0	FALSE
col_1_teb_4_RB_1_104596_pUBC-YFP-mod0	wt	3	208	1	TRUE	3:9931689	forward	3	9931689	RB	LZ156_1	4	ATAG	0		-7	Col-0	104596	pUBC-YFP-mod0	FALSE
col_1_teb_4_RB_1_104596_pUBC-YFP-mod0	wt	4	174	0.75	TRUE	3:15763273	reverse	3	15763273	RB	LZ156_1	0		7	TGTTTGA	0	Col-0	104596	pUBC-YFP-mod0	FALSE
col_1_teb_4_RB_1_104596_pUBC-YFP-mod0	wt	5	177	1	TRUE	3:17868366	forward	3	17868366	RB	LZ156_1	0		2	GA	0	Col-0	104596	pUBC-YFP-mod0	FALSE
col_1_teb_4_RB_1_104596_pUBC-YFP-mod0	wt	5	247	1	TRUE	3:18445503	reverse	3	18445503	RB	LZ156_1	0		2	GA	0	Col-0	104596	pUBC-YFP-mod0	FALSE
col_1_teb_4_RB_1_104596_pUBC-YFP-mod0	wt	5	349	1	TRUE	3:18913136	forward	3	18913136	RB	LZ156_1	0		2	GA	0	Col-0	104596	pUBC-YFP-mod0	FALSE
col_1_teb_4_RB_1_104596_pUBC-YFP-mod0	wt	3	159	1	TRUE	3:19744978	reverse	3	19744978	RB	LZ156_1	0		4	TGAC	1	Col-0	104596	pUBC-YFP-mod0	FALSE
col_1_teb_4_RB_1_104596_pUBC-YFP-mod0	wt	11	282	0.909091	TRUE	3:20358278	reverse	3	20358278	RB	LZ156_1	0		2	TG	-5	Col-0	104596	pUBC-YFP-mod0	FALSE
col_1_teb_4_RB_1_104596_pUBC-YFP-mod0	wt	6	185	0.833333	TRUE	3:20577135	forward	3	20577135	RB	LZ156_1	6	TATACA	0		0	Col-0	104596	pUBC-YFP-mod0	FALSE
col_1_teb_4_RB_1_104596_pUBC-YFP-mod0	wt	19	359	0.947368	TRUE	3:20775254	forward	3	20775254	RB	LZ156_1	29	GTTGCGATCTTTTCAGTAAATGTGTTAAT	0		0	Col-0	104596	pUBC-YFP-mod0	FALSE
col_1_teb_4_RB_1_104596_pUBC-YFP-mod0	wt	7	417	1	TRUE	3:20808228	reverse	3	20808228	RB	LZ156_1	0		1	A	0	Col-0	104596	pUBC-YFP-mod0	FALSE
col_1_teb_4_RB_1_104596_pUBC-YFP-mod0	wt	3	269	1	TRUE	3:21044452	reverse	3	21044452	RB	LZ156_1	0		2	CA	2	Col-0	104596	pUBC-YFP-mod0	FALSE
col_1_teb_4_RB_1_104596_pUBC-YFP-mod0	wt	14	392	0.928571	TRUE	3:22468677	forward	3	22468677	RB	LZ156_1	0		6	TGTTTG	-1	Col-0	104596	pUBC-YFP-mod0	FALSE
col_1_teb_4_RB_1_104596_pUBC-YFP-mod0	wt	24	534	1	TRUE	3:22468702	reverse	3	22468702	RB	LZ156_1	0		0		0	Col-0	104596	pUBC-YFP-mod0	FALSE
col_1_teb_4_RB_1_104596_pUBC-YFP-mod0	wt	7	330	1	TRUE	3:22972445	reverse	3	22972445	RB	LZ156_1	0		1	A	0	Col-0	104596	pUBC-YFP-mod0	FALSE
col_1_teb_4_RB_1_104596_pUBC-YFP-mod0	wt	3	142	1	TRUE	3:1046718	forward	3	1046718	RB	LZ156_1	40	TACTCAGTTTCCACATGTCATAGCTCACTTCAGTTTAAAC	0		0	Col-0	104596	pUBC-YFP-mod0	FALSE
col_1_teb_4_RB_1_104596_pUBC-YFP-mod0	wt	4	393	0.75	TRUE	3:20250981	forward	3	20250981	RB	LZ156_1	37	AGAAATATGATTACGTATTAAGTTCCCGACGTTCCCG	0		0	Col-0	104596	pUBC-YFP-mod0	FALSE
col_1_teb_4_RB_1_104596_pUBC-YFP-mod0	wt	17	498	0.944444	TRUE	3:7107977	reverse	3	7107977	RB	LZ156_1	59	CATGTGTAACGCAAACACAGTGTTTGCATGTGTTTGTTTACACCACAATCATCTATGTT	0		-1	Col-0	104596	pUBC-YFP-mod0	FALSE
col_1_teb_4_RB_1_104596_pUBC-YFP-mod0	wt	6	254	1	TRUE	Pt:54825	reverse	Pt	54825	RB	LZ156_1	0		1	G	-7	Col-0	104596	pUBC-YFP-mod0	FALSE
col_1_teb_4_RB_1_104596_pUBC-YFP-mod0	wt	5	210	0.8	TRUE	4:35039	forward	4	35039	RB	LZ156_1	0		2	GT	-6	Col-0	104596	pUBC-YFP-mod0	FALSE
col_1_teb_4_RB_1_104596_pUBC-YFP-mod0	wt	4	162	1	TRUE	4:412513	reverse	4	412513	RB	LZ156_1	0		4	TGAC	1	Col-0	104596	pUBC-YFP-mod0	FALSE
col_1_teb_4_RB_1_104596_pUBC-YFP-mod0	wt	8	425	0.75	TRUE	4:1043638	reverse	4	1043638	RB	LZ156_1	23	GCTTGAGCTTGGATCAGATTTCT	0		0	Col-0	104596	pUBC-YFP-mod0	FALSE
col_1_teb_4_RB_1_104596_pUBC-YFP-mod0	wt	6	166	0.833333	TRUE	4:1051436	forward	4	1051436	RB	LZ156_1	0		0		-27	Col-0	104596	pUBC-YFP-mod0	FALSE
col_1_teb_4_RB_1_104596_pUBC-YFP-mod0	wt	3	296	1	TRUE	4:1051498	reverse	4	1051498	RB	LZ156_1	0		1	A	0	Col-0	104596	pUBC-YFP-mod0	FALSE
col_1_teb_4_RB_1_104596_pUBC-YFP-mod0	wt	18	313	0.944444	TRUE	4:2218727	forward	4	2218727	RB	LZ156_1	0		3	TTT	-2	Col-0	104596	pUBC-YFP-mod0	FALSE
col_1_teb_4_RB_1_104596_pUBC-YFP-mod0	wt	13	571	0.923077	TRUE	4:2218716	forward	4	2218716	RB	LZ156_1	6	TCAAAC	0		0	Col-0	104596	pUBC-YFP-mod0	FALSE
col_1_teb_4_RB_1_104596_pUBC-YFP-mod0	wt	4	226	1	TRUE	4:2289755	forward	4	2289755	RB	LZ156_1	0		1	C	1	Col-0	104596	pUBC-YFP-mod0	FALSE
col_1_teb_4_RB_1_104596_pUBC-YFP-mod0	wt	8	349	0.875	TRUE	4:5742028	reverse	4	5742028	RB	LZ156_1	0		1	A	0	Col-0	104596	pUBC-YFP-mod0	FALSE
col_1_teb_4_RB_1_104596_pUBC-YFP-mod0	wt	31	313	0.870968	TRUE	4:6673824	forward	4	6673824	RB	LZ156_1	0		0		0	Col-0	104596	pUBC-YFP-mod0	FALSE
col_1_teb_4_RB_1_104596_pUBC-YFP-mod0	wt	3	199	1	TRUE	4:7775108	reverse	4	7775108	RB	LZ156_1	0		3	TGA	0	Col-0	104596	pUBC-YFP-mod0	FALSE
col_1_teb_4_RB_1_104596_pUBC-YFP-mod0	wt	7	373	0.857143	TRUE	4:8344664	reverse	4	8344664	RB	LZ156_1	0		2	TG	-1	Col-0	104596	pUBC-YFP-mod0	FALSE
col_1_teb_4_RB_1_104596_pUBC-YFP-mod0	wt	5	113	1	TRUE	4:8426691	reverse	4	8426691	RB	LZ156_1	0		4	GACA	2	Col-0	104596	pUBC-YFP-mod0	FALSE
col_1_teb_4_RB_1_104596_pUBC-YFP-mod0	wt	4	317	1	TRUE	4:8515234	reverse	4	8515234	RB	LZ156_1	0		2	GA	0	Col-0	104596	pUBC-YFP-mod0	FALSE
col_1_teb_4_RB_1_104596_pUBC-YFP-mod0	wt	13	529	1	TRUE	4:8550379	forward	4	8550379	RB	LZ156_1	0		5	CCTTC	-22	Col-0	104596	pUBC-YFP-mod0	FALSE
col_1_teb_4_RB_1_104596_pUBC-YFP-mod0	wt	7	235	1	TRUE	4:8579615	forward	4	8579615	RB	LZ156_1	13	ATCAGTGTTCCCG	0		-24	Col-0	104596	pUBC-YFP-mod0	FALSE
col_1_teb_4_RB_1_104596_pUBC-YFP-mod0	wt	9	232	1	TRUE	4:9113634	forward	4	9113634	RB	LZ156_1	30	AGATTTGATCAAACACTCGATTGGTCCTCC	0		-8	Col-0	104596	pUBC-YFP-mod0	FALSE
col_1_teb_4_RB_1_104596_pUBC-YFP-mod0	wt	9	187	1	TRUE	4:9837320	forward	4	9837320	RB	LZ156_1	0		2	GA	0	Col-0	104596	pUBC-YFP-mod0	FALSE
col_1_teb_4_RB_1_104596_pUBC-YFP-mod0	wt	11	323	0.909091	TRUE	4:9901142	reverse	4	9901142	RB	LZ156_1	0		3	TGA	0	Col-0	104596	pUBC-YFP-mod0	FALSE
col_1_teb_4_RB_1_104596_pUBC-YFP-mod0	wt	5	210	1	TRUE	4:9945912	reverse	4	9945912	RB	LZ156_1	17	AAACAAACGTCCGCAAA	0		-4	Col-0	104596	pUBC-YFP-mod0	FALSE
col_1_teb_4_RB_1_104596_pUBC-YFP-mod0	wt	9	272	1	TRUE	4:11675349	forward	4	11675349	RB	LZ156_1	0		3	AGT	-19	Col-0	104596	pUBC-YFP-mod0	FALSE
col_1_teb_4_RB_1_104596_pUBC-YFP-mod0	wt	9	241	1	TRUE	4:12359600	reverse	4	12359600	RB	LZ156_1	8	AAGTACTG	0		0	Col-0	104596	pUBC-YFP-mod0	FALSE
col_1_teb_4_RB_1_104596_pUBC-YFP-mod0	wt	4	337	1	TRUE	4:12769713	forward	4	12769713	RB	LZ156_1	0		3	ATC	-9	Col-0	104596	pUBC-YFP-mod0	FALSE
col_1_teb_4_RB_1_104596_pUBC-YFP-mod0	wt	3	293	1	TRUE	4:12976762	forward	4	12976762	RB	LZ156_1	36	GAGGGTCATGTATGTGAAAGGGTAGGCGATTGGTGA	0		0	Col-0	104596	pUBC-YFP-mod0	FALSE
col_1_teb_4_RB_1_104596_pUBC-YFP-mod0	wt	3	313	1	TRUE	4:13197513	forward	4	13197513	RB	LZ156_1	0		2	CA	2	Col-0	104596	pUBC-YFP-mod0	FALSE
col_1_teb_4_RB_1_104596_pUBC-YFP-mod0	wt	7	411	0.857143	TRUE	4:14581628	forward	4	14581628	RB	LZ156_1	0		3	ACA	2	Col-0	104596	pUBC-YFP-mod0	FALSE
col_1_teb_4_RB_1_104596_pUBC-YFP-mod0	wt	3	282	1	TRUE	4:15222893	reverse	4	15222893	RB	LZ156_1	0		5	TTTGA	0	Col-0	104596	pUBC-YFP-mod0	FALSE
col_1_teb_4_RB_1_104596_pUBC-YFP-mod0	wt	9	275	1	TRUE	4:15580375	reverse	4	15580375	RB	LZ156_1	0		5	TTTGA	0	Col-0	104596	pUBC-YFP-mod0	FALSE
col_1_teb_4_RB_1_104596_pUBC-YFP-mod0	wt	4	331	1	TRUE	4:16295229	forward	4	16295229	RB	LZ156_1	8	AAACACCT	0		0	Col-0	104596	pUBC-YFP-mod0	FALSE
col_1_teb_4_RB_1_104596_pUBC-YFP-mod0	wt	4	400	1	TRUE	4:16722111	forward	4	16722111	RB	LZ156_1	0		0		0	Col-0	104596	pUBC-YFP-mod0	FALSE
col_1_teb_4_RB_1_104596_pUBC-YFP-mod0	wt	3	330	1	TRUE	4:16767109	forward	4	16767109	RB	LZ156_1	0		0		-4	Col-0	104596	pUBC-YFP-mod0	FALSE
col_1_teb_4_RB_1_104596_pUBC-YFP-mod0	wt	3	212	1	TRUE	4:17332349	forward	4	17332349	RB	LZ156_1	0		3	AAC	-13	Col-0	104596	pUBC-YFP-mod0	FALSE
col_1_teb_4_RB_1_104596_pUBC-YFP-mod0	wt	4	234	1	TRUE	4:17737085	forward	4	17737085	RB	LZ156_1	0		3	ACA	2	Col-0	104596	pUBC-YFP-mod0	FALSE
col_1_teb_4_RB_1_104596_pUBC-YFP-mod0	wt	3	297	1	TRUE	4:17922213	reverse	4	17922213	RB	LZ156_1	0		3	TGA	0	Col-0	104596	pUBC-YFP-mod0	FALSE
col_1_teb_4_RB_1_104596_pUBC-YFP-mod0	wt	3	111	1	TRUE	4:18208217	forward	4	18208217	RB	LZ156_1	19	GCGGGGAGAGGCGGTTTAA	0		-26	Col-0	104596	pUBC-YFP-mod0	FALSE
col_1_teb_4_RB_1_104596_pUBC-YFP-mod0	wt	7	391	0.857143	TRUE	4:8426685	forward	4	8426685	RB	LZ156_1	38	TTTTAACTTTGTTAACTTTTTTAACTTTGTTAACTTTG	0		1	Col-0	104596	pUBC-YFP-mod0	FALSE
col_1_teb_4_RB_1_104596_pUBC-YFP-mod0	wt	4	119	1	TRUE	5:373969	reverse	5	373969	RB	LZ156_1	27	ACTATCAGTGTTTCCCGCTGCTAATCA	0		0	Col-0	104596	pUBC-YFP-mod0	FALSE
col_1_teb_4_RB_1_104596_pUBC-YFP-mod0	wt	8	221	0.875	TRUE	5:872662	reverse	5	872662	RB	LZ156_1	0		2	TG	-1	Col-0	104596	pUBC-YFP-mod0	FALSE
col_1_teb_4_RB_1_104596_pUBC-YFP-mod0	wt	3	199	1	TRUE	5:1165688	reverse	5	1165688	RB	LZ156_1	3	AAT	0		0	Col-0	104596	pUBC-YFP-mod0	FALSE
col_1_teb_4_RB_1_104596_pUBC-YFP-mod0	wt	3	244	1	TRUE	5:1317810	reverse	5	1317810	RB	LZ156_1	0		0		0	Col-0	104596	pUBC-YFP-mod0	FALSE
col_1_teb_4_RB_1_104596_pUBC-YFP-mod0	wt	3	124	1	TRUE	5:1437717	forward	5	1437717	RB	LZ156_1	0		0		-1	Col-0	104596	pUBC-YFP-mod0	FALSE
col_1_teb_4_RB_1_104596_pUBC-YFP-mod0	wt	3	166	1	TRUE	5:1993402	reverse	5	1993402	RB	LZ156_1	8	TTATTGTA	0		0	Col-0	104596	pUBC-YFP-mod0	FALSE
col_1_teb_4_RB_1_104596_pUBC-YFP-mod0	wt	3	400	1	TRUE	5:2016649	reverse	5	2016649	RB	LZ156_1	2	TT	0		0	Col-0	104596	pUBC-YFP-mod0	FALSE
col_1_teb_4_RB_1_104596_pUBC-YFP-mod0	wt	4	203	1	TRUE	5:2116819	reverse	5	2116819	RB	LZ156_1	15	ATGTGCATGAAGTAG	0		0	Col-0	104596	pUBC-YFP-mod0	FALSE
col_1_teb_4_RB_1_104596_pUBC-YFP-mod0	wt	4	261	1	TRUE	5:2176139	forward	5	2176139	RB	LZ156_1	0		2	TT	-3	Col-0	104596	pUBC-YFP-mod0	FALSE
col_1_teb_4_RB_1_104596_pUBC-YFP-mod0	wt	4	227	0.75	TRUE	5:2287584	reverse	5	2287584	RB	LZ156_1	2	GT	0		-7	Col-0	104596	pUBC-YFP-mod0	FALSE
col_1_teb_4_RB_1_104596_pUBC-YFP-mod0	wt	12	219	1	TRUE	5:2548721	forward	5	2548721	RB	LZ156_1	26	AATTCAGTACATTAAAAACGTCCGCA	0		-3	Col-0	104596	pUBC-YFP-mod0	FALSE
col_1_teb_4_RB_1_104596_pUBC-YFP-mod0	wt	7	206	1	TRUE	5:4126395	reverse	5	4126395	RB	LZ156_1	0		1	A	0	Col-0	104596	pUBC-YFP-mod0	FALSE
col_1_teb_4_RB_1_104596_pUBC-YFP-mod0	wt	11	294	0.909091	TRUE	5:4128010	reverse	5	4128010	RB	LZ156_1	0		1	C	1	Col-0	104596	pUBC-YFP-mod0	FALSE
col_1_teb_4_RB_1_104596_pUBC-YFP-mod0	wt	4	241	1	TRUE	5:4474654	reverse	5	4474654	RB	LZ156_1	8	TCCGCCCT	0		-2	Col-0	104596	pUBC-YFP-mod0	FALSE
col_1_teb_4_RB_1_104596_pUBC-YFP-mod0	wt	3	89	1	TRUE	5:4535632	reverse	5	4535632	RB	LZ156_1	3	ACT	0		0	Col-0	104596	pUBC-YFP-mod0	FALSE
col_1_teb_4_RB_1_104596_pUBC-YFP-mod0	wt	4	164	1	TRUE	5:4758948	reverse	5	4758948	RB	LZ156_1	0		2	GA	0	Col-0	104596	pUBC-YFP-mod0	FALSE
col_1_teb_4_RB_1_104596_pUBC-YFP-mod0	wt	4	210	1	TRUE	5:5583768	reverse	5	5583768	RB	LZ156_1	0		0		0	Col-0	104596	pUBC-YFP-mod0	FALSE
col_1_teb_4_RB_1_104596_pUBC-YFP-mod0	wt	3	155	1	TRUE	5:6164309	forward	5	6164309	RB	LZ156_1	0		0		0	Col-0	104596	pUBC-YFP-mod0	FALSE
col_1_teb_4_RB_1_104596_pUBC-YFP-mod0	wt	5	207	0.8	TRUE	5:6762662	reverse	5	6762662	RB	LZ156_1	0		2	GA	0	Col-0	104596	pUBC-YFP-mod0	FALSE
col_1_teb_4_RB_1_104596_pUBC-YFP-mod0	wt	3	264	1	TRUE	5:7817177	forward	5	7817177	RB	LZ156_1	0		1	A	0	Col-0	104596	pUBC-YFP-mod0	FALSE
col_1_teb_4_RB_1_104596_pUBC-YFP-mod0	wt	3	259	1	TRUE	5:8918640	reverse	5	8918640	RB	LZ156_1	2	AT	0		-2	Col-0	104596	pUBC-YFP-mod0	FALSE
col_1_teb_4_RB_1_104596_pUBC-YFP-mod0	wt	35	291	0.971429	TRUE	5:9459211	reverse	5	9459211	RB	LZ156_1	9	ATTTGTAGA	0		-8	Col-0	104596	pUBC-YFP-mod0	FALSE
col_1_teb_4_RB_1_104596_pUBC-YFP-mod0	wt	3	135	1	TRUE	5:13463638	reverse	5	13463638	RB	LZ156_1	0		0		0	Col-0	104596	pUBC-YFP-mod0	FALSE
col_1_teb_4_RB_1_104596_pUBC-YFP-mod0	wt	3	192	1	TRUE	5:14857362	forward	5	14857362	RB	LZ156_1	3	CGA	0		-13	Col-0	104596	pUBC-YFP-mod0	FALSE
col_1_teb_4_RB_1_104596_pUBC-YFP-mod0	wt	3	161	1	TRUE	5:14908891	forward	5	14908891	RB	LZ156_1	0		4	TATC	-9	Col-0	104596	pUBC-YFP-mod0	FALSE
col_1_teb_4_RB_1_104596_pUBC-YFP-mod0	wt	6	194	1	TRUE	5:15954112	reverse	5	15954112	RB	LZ156_1	0		2	CT	-12	Col-0	104596	pUBC-YFP-mod0	FALSE
col_1_teb_4_RB_1_104596_pUBC-YFP-mod0	wt	12	180	0.823529	TRUE	5:16579607	reverse	5	16579607	RB	LZ156_1	14	AATTGACGCTTAGA	0		0	Col-0	104596	pUBC-YFP-mod0	FALSE
col_1_teb_4_RB_1_104596_pUBC-YFP-mod0	wt	5	174	0.8	TRUE	5:17931953	forward	5	17931953	RB	LZ156_1	0		4	TTTA	-16	Col-0	104596	pUBC-YFP-mod0	FALSE
col_1_teb_4_RB_1_104596_pUBC-YFP-mod0	wt	3	161	1	TRUE	5:18168590	reverse	5	18168590	RB	LZ156_1	0		1	A	0	Col-0	104596	pUBC-YFP-mod0	FALSE
col_1_teb_4_RB_1_104596_pUBC-YFP-mod0	wt	4	359	0.75	TRUE	5:20726100	reverse	5	20726100	RB	LZ156_1	24	TAATTAGCTCAATTACTTCTTCAT	0		0	Col-0	104596	pUBC-YFP-mod0	FALSE
col_1_teb_4_RB_1_104596_pUBC-YFP-mod0	wt	20	440	0.9	TRUE	5:20771100	forward	5	20771100	RB	LZ156_1	0		1	A	0	Col-0	104596	pUBC-YFP-mod0	FALSE
col_1_teb_4_RB_1_104596_pUBC-YFP-mod0	wt	3	413	1	TRUE	5:21005322	reverse	5	21005322	RB	LZ156_1	0		8	AACTATCA	-8	Col-0	104596	pUBC-YFP-mod0	FALSE
col_1_teb_4_RB_1_104596_pUBC-YFP-mod0	wt	3	170	1	TRUE	5:21211402	reverse	5	21211402	RB	LZ156_1	0		3	ACA	2	Col-0	104596	pUBC-YFP-mod0	FALSE
col_1_teb_4_RB_1_104596_pUBC-YFP-mod0	wt	3	244	1	TRUE	5:21485405	reverse	5	21485405	RB	LZ156_1	10	TTAGGCACCC	0		-21	Col-0	104596	pUBC-YFP-mod0	FALSE
col_1_teb_4_RB_1_104596_pUBC-YFP-mod0	wt	6	261	1	TRUE	5:23131794	forward	5	23131794	RB	LZ156_1	0		1	A	0	Col-0	104596	pUBC-YFP-mod0	FALSE
col_1_teb_4_RB_1_104596_pUBC-YFP-mod0	wt	3	212	1	TRUE	5:23824250	reverse	5	23824250	RB	LZ156_1	0		5	TTTGA	0	Col-0	104596	pUBC-YFP-mod0	FALSE
col_1_teb_4_RB_1_104596_pUBC-YFP-mod0	wt	17	390	0.941176	TRUE	5:25010481	reverse	5	25010481	RB	LZ156_1	0		5	TGACA	2	Col-0	104596	pUBC-YFP-mod0	FALSE
col_1_teb_4_RB_1_104596_pUBC-YFP-mod0	wt	7	261	1	TRUE	5:25502842	reverse	5	25502842	RB	LZ156_1	0		0		0	Col-0	104596	pUBC-YFP-mod0	FALSE
col_1_teb_4_RB_1_104596_pUBC-YFP-mod0	wt	3	202	1	TRUE	5:25746922	forward	5	25746922	RB	LZ156_1	0		1	G	-1	Col-0	104596	pUBC-YFP-mod0	FALSE
col_1_teb_4_RB_1_104596_pUBC-YFP-mod0	wt	3	179	1	TRUE	5:26097417	reverse	5	26097417	RB	LZ156_1	0		1	C	1	Col-0	104596	pUBC-YFP-mod0	FALSE
col_1_teb_4_RB_1_104596_pUBC-YFP-mod0	wt	5	180	1	TRUE	5:26352499	reverse	5	26352499	RB	LZ156_1	19	ACATCAACCACTACATCGA	0		0	Col-0	104596	pUBC-YFP-mod0	FALSE
col_1_teb_4_RB_1_104596_pUBC-YFP-mod0	wt	3	232	1	TRUE	5:26474912	forward	5	26474912	RB	LZ156_1	25	CAACTTTAACGGGACAATCATCACA	0		-1	Col-0	104596	pUBC-YFP-mod0	FALSE
col_1_teb_4_RB_1_104596_pUBC-YFP-mod0	wt	16	263	0.875	TRUE	5:26527313	forward	5	26527313	RB	LZ156_1	0		0		0	Col-0	104596	pUBC-YFP-mod0	FALSE
col_1_teb_4_RB_1_104596_pUBC-YFP-mod0	wt	3	189	1	TRUE	5:26716712	reverse	5	26716712	RB	LZ156_1	0		1	A	0	Col-0	104596	pUBC-YFP-mod0	FALSE
col_1_teb_4_RB_1_104596_pUBC-YFP-mod0	wt	3	321	1	TRUE	5:26733160	forward	5	26733160	RB	LZ156_1	0		1	T	-3	Col-0	104596	pUBC-YFP-mod0	FALSE
col_1_teb_4_RB_1_104596_pUBC-YFP-mod0	wt	3	117	1	TRUE	5:2117255	forward	5	2117255	RB	LZ156_1	55	CGGGGGTATCAGCTTGCATGCCGGTCGGACTCTAATCATAAATTAAACTATCAGT	0		1	Col-0	104596	pUBC-YFP-mod0	FALSE
col_1_teb_4_RB_1_104596_pUBC-YFP-mod0	wt	11	373	1	TRUE	Mt:41765	forward	Mt	41765	RB	LZ156_1	4	AACG	0		0	Col-0	104596	pUBC-YFP-mod0	FALSE
col_1_teb_4_RB_1_104596_pUBC-YFP-mod0	wt	4	182	1	TRUE	Mt:43976	reverse	Mt	43976	RB	LZ156_1	0		3	TTG	-1	Col-0	104596	pUBC-YFP-mod0	FALSE
col_1_teb_4_RB_4_104596_pUBC-YFP-mod2	teb	7	243	1	TRUE	1:6912662	forward	1	6912662	RB	LZ157_6	0		1	A	0	Col-0	104596	pUBC-YFP-mod2	FALSE
col_1_teb_4_RB_4_104596_pUBC-YFP-mod2	teb	3	157	1	TRUE	1:30153039	reverse	1	30153039	RB	LZ157_6	0		1	A	0	Col-0	104596	pUBC-YFP-mod2	FALSE
col_1_teb_4_RB_4_104596_pUBC-YFP-mod2	teb	3	188	1	TRUE	4:7663790	reverse	4	7663790	RB	LZ157_6	0		2	AC	1	Col-0	104596	pUBC-YFP-mod2	FALSE
col_1_teb_4_RB_4_104596_pUBC-YFP-mod2	teb	3	202	1	TRUE	5:15063606	forward	5	15063606	RB	LZ157_6	0		1	A	0	Col-0	104596	pUBC-YFP-mod2	FALSE
col_4_teb_1_LB_1_104596_pUBC-YFP-mod0	teb	121	492	0.827869	TRUE	1:17920094	reverse	1	17920094	LB	LZ157_2	0		1	A	-25	Col-0	104596	pUBC-YFP-mod0	FALSE
col_4_teb_1_LB_1_104596_pUBC-YFP-mod0	teb	3	201	1	TRUE	3:11802124	reverse	3	11802124	LB	LZ157_2	0		2	AT	-51	Col-0	104596	pUBC-YFP-mod0	FALSE
col_4_teb_1_LB_4_104596_pUBC-YFP-mod2	wt	12	478	0.916667	TRUE	1:73933	reverse	1	73933	LB	LZ156_13	0		2	TC	-41	Col-0	104596	pUBC-YFP-mod2	FALSE
col_4_teb_1_LB_4_104596_pUBC-YFP-mod2	wt	4	310	1	TRUE	1:309551	reverse	1	309551	LB	LZ156_13	0		6	TCCGAA	-54	Col-0	104596	pUBC-YFP-mod2	FALSE
col_4_teb_1_LB_4_104596_pUBC-YFP-mod2	wt	4	122	0.75	TRUE	1:405634	forward	1	405634	LB	LZ156_13	0		2	AG	-22	Col-0	104596	pUBC-YFP-mod2	FALSE
col_4_teb_1_LB_4_104596_pUBC-YFP-mod2	wt	9	421	0.777778	TRUE	1:1058167	reverse	1	1058167	LB	LZ156_13	19	GTATATGATTCATCCAGGT	0		-27	Col-0	104596	pUBC-YFP-mod2	FALSE
col_4_teb_1_LB_4_104596_pUBC-YFP-mod2	wt	9	336	1	TRUE	1:1129628	reverse	1	1129628	LB	LZ156_13	0		1	A	-40	Col-0	104596	pUBC-YFP-mod2	FALSE
col_4_teb_1_LB_4_104596_pUBC-YFP-mod2	wt	6	233	0.833333	TRUE	1:1434415	forward	1	1434415	LB	LZ156_13	0		1	G	-32	Col-0	104596	pUBC-YFP-mod2	FALSE
col_4_teb_1_LB_4_104596_pUBC-YFP-mod2	wt	18	454	0.888889	TRUE	1:2454149	forward	1	2454149	LB	LZ156_13	0		1	T	-39	Col-0	104596	pUBC-YFP-mod2	FALSE
col_4_teb_1_LB_4_104596_pUBC-YFP-mod2	wt	3	111	1	TRUE	1:2805028	forward	1	2805028	LB	LZ156_13	0		2	CC	-62	Col-0	104596	pUBC-YFP-mod2	FALSE
col_4_teb_1_LB_4_104596_pUBC-YFP-mod2	wt	3	181	1	TRUE	1:2895089	forward	1	2895089	LB	LZ156_13	0		2	CC	-57	Col-0	104596	pUBC-YFP-mod2	FALSE
col_4_teb_1_LB_4_104596_pUBC-YFP-mod2	wt	4	149	0.75	TRUE	1:3054008	reverse	1	3054008	LB	LZ156_13	15	TGATTCATCCAGGTG	0		-8	Col-0	104596	pUBC-YFP-mod2	FALSE
col_4_teb_1_LB_4_104596_pUBC-YFP-mod2	wt	10	260	1	TRUE	1:3173319	forward	1	3173319	LB	LZ156_13	0		3	ACT	-52	Col-0	104596	pUBC-YFP-mod2	FALSE
col_4_teb_1_LB_4_104596_pUBC-YFP-mod2	wt	4	124	1	TRUE	1:4491114	reverse	1	4491114	LB	LZ156_13	5	TGTTG	0		-41	Col-0	104596	pUBC-YFP-mod2	FALSE
col_4_teb_1_LB_4_104596_pUBC-YFP-mod2	wt	3	264	1	TRUE	1:4515689	reverse	1	4515689	LB	LZ156_13	1	C	0		-36	Col-0	104596	pUBC-YFP-mod2	FALSE
col_4_teb_1_LB_4_104596_pUBC-YFP-mod2	wt	3	281	1	TRUE	1:5958013	reverse	1	5958013	LB	LZ156_13	0		4	ACCA	-12	Col-0	104596	pUBC-YFP-mod2	FALSE
col_4_teb_1_LB_4_104596_pUBC-YFP-mod2	wt	3	190	1	TRUE	1:6674176	reverse	1	6674176	LB	LZ156_13	0		3	AGC	-66	Col-0	104596	pUBC-YFP-mod2	FALSE
col_4_teb_1_LB_4_104596_pUBC-YFP-mod2	wt	3	411	1	TRUE	1:7490175	forward	1	7490175	LB	LZ156_13	0		5	TTGAT	-43	Col-0	104596	pUBC-YFP-mod2	FALSE
col_4_teb_1_LB_4_104596_pUBC-YFP-mod2	wt	37	343	0.947368	TRUE	1:7494214	reverse	1	7494214	LB	LZ156_13	1	C	0		-44	Col-0	104596	pUBC-YFP-mod2	FALSE
col_4_teb_1_LB_4_104596_pUBC-YFP-mod2	wt	7	345	0.857143	TRUE	1:8198657	forward	1	8198657	LB	LZ156_13	0		1	A	-55	Col-0	104596	pUBC-YFP-mod2	FALSE
col_4_teb_1_LB_4_104596_pUBC-YFP-mod2	wt	3	245	1	TRUE	1:8855822	reverse	1	8855822	LB	LZ156_13	0		4	GCTT	-29	Col-0	104596	pUBC-YFP-mod2	FALSE
col_4_teb_1_LB_4_104596_pUBC-YFP-mod2	wt	3	307	1	TRUE	1:10009927	reverse	1	10009927	LB	LZ156_13	0		1	A	-36	Col-0	104596	pUBC-YFP-mod2	FALSE
col_4_teb_1_LB_4_104596_pUBC-YFP-mod2	wt	4	77	1	TRUE	1:10174133	forward	1	10174133	LB	LZ156_13	0		6	CCAGGT	-33	Col-0	104596	pUBC-YFP-mod2	FALSE
col_4_teb_1_LB_4_104596_pUBC-YFP-mod2	wt	113	444	0.982759	TRUE	1:11908272	forward	1	11908272	LB	LZ156_13	0		3	CCG	-56	Col-0	104596	pUBC-YFP-mod2	FALSE
col_4_teb_1_LB_4_104596_pUBC-YFP-mod2	wt	7	259	1	TRUE	1:11911484	reverse	1	11911484	LB	LZ156_13	2	TG	0		-24	Col-0	104596	pUBC-YFP-mod2	FALSE
col_4_teb_1_LB_4_104596_pUBC-YFP-mod2	wt	8	222	1	TRUE	1:13684349	reverse	1	13684349	LB	LZ156_13	0		1	T	-42	Col-0	104596	pUBC-YFP-mod2	FALSE
col_4_teb_1_LB_4_104596_pUBC-YFP-mod2	wt	4	209	0.75	TRUE	1:18126224	forward	1	18126224	LB	LZ156_13	21	TCTCTCAGCGGCCTGTCCGAA	0		-51	Col-0	104596	pUBC-YFP-mod2	FALSE
col_4_teb_1_LB_4_104596_pUBC-YFP-mod2	wt	3	90	1	TRUE	1:18126317	reverse	1	18126317	LB	LZ156_13	0		0		-49	Col-0	104596	pUBC-YFP-mod2	FALSE
col_4_teb_1_LB_4_104596_pUBC-YFP-mod2	wt	3	148	1	TRUE	1:18474121	forward	1	18474121	LB	LZ156_13	0		1	T	-33	Col-0	104596	pUBC-YFP-mod2	FALSE
col_4_teb_1_LB_4_104596_pUBC-YFP-mod2	wt	3	144	1	TRUE	1:18980367	reverse	1	18980367	LB	LZ156_13	0		3	ATT	-42	Col-0	104596	pUBC-YFP-mod2	FALSE
col_4_teb_1_LB_4_104596_pUBC-YFP-mod2	wt	5	182	0.8	TRUE	1:19408880	reverse	1	19408880	LB	LZ156_13	0		3	TCA	-26	Col-0	104596	pUBC-YFP-mod2	FALSE
col_4_teb_1_LB_4_104596_pUBC-YFP-mod2	wt	10	289	0.8	TRUE	1:19445535	forward	1	19445535	LB	LZ156_13	0		4	CTTT	-28	Col-0	104596	pUBC-YFP-mod2	FALSE
col_4_teb_1_LB_4_104596_pUBC-YFP-mod2	wt	6	243	1	TRUE	1:19888250	forward	1	19888250	LB	LZ156_13	0		4	TCAG	-25	Col-0	104596	pUBC-YFP-mod2	FALSE
col_4_teb_1_LB_4_104596_pUBC-YFP-mod2	wt	7	270	1	TRUE	1:20224290	forward	1	20224290	LB	LZ156_13	0		3	TGT	-59	Col-0	104596	pUBC-YFP-mod2	FALSE
col_4_teb_1_LB_4_104596_pUBC-YFP-mod2	wt	4	452	1	TRUE	1:20899114	reverse	1	20899114	LB	LZ156_13	0		4	TCAG	-25	Col-0	104596	pUBC-YFP-mod2	FALSE
col_4_teb_1_LB_4_104596_pUBC-YFP-mod2	wt	3	208	1	TRUE	1:20971627	forward	1	20971627	LB	LZ156_13	0		5	TTTCA	-26	Col-0	104596	pUBC-YFP-mod2	FALSE
col_4_teb_1_LB_4_104596_pUBC-YFP-mod2	wt	8	278	0.75	TRUE	1:20984191	forward	1	20984191	LB	LZ156_13	0		1	C	-31	Col-0	104596	pUBC-YFP-mod2	FALSE
col_4_teb_1_LB_4_104596_pUBC-YFP-mod2	wt	11	203	0.909091	TRUE	1:21017185	forward	1	21017185	LB	LZ156_13	0		1	T	-43	Col-0	104596	pUBC-YFP-mod2	FALSE
col_4_teb_1_LB_4_104596_pUBC-YFP-mod2	wt	3	383	1	TRUE	1:21886525	forward	1	21886525	LB	LZ156_13	0		1	T	-33	Col-0	104596	pUBC-YFP-mod2	FALSE
col_4_teb_1_LB_4_104596_pUBC-YFP-mod2	wt	17	286	0.823529	TRUE	1:22075059	reverse	1	22075059	LB	LZ156_13	9	AACTGACCT	0		-34	Col-0	104596	pUBC-YFP-mod2	FALSE
col_4_teb_1_LB_4_104596_pUBC-YFP-mod2	wt	4	302	1	TRUE	1:22142770	reverse	1	22142770	LB	LZ156_13	0		4	ATTC	-41	Col-0	104596	pUBC-YFP-mod2	FALSE
col_4_teb_1_LB_4_104596_pUBC-YFP-mod2	wt	16	357	0.9375	TRUE	1:22589422	reverse	1	22589422	LB	LZ156_13	0		0		-40	Col-0	104596	pUBC-YFP-mod2	FALSE
col_4_teb_1_LB_4_104596_pUBC-YFP-mod2	wt	4	82	1	TRUE	1:22877419	forward	1	22877419	LB	LZ156_13	0		2	CC	-48	Col-0	104596	pUBC-YFP-mod2	FALSE
col_4_teb_1_LB_4_104596_pUBC-YFP-mod2	wt	4	158	1	TRUE	1:23494135	forward	1	23494135	LB	LZ156_13	0		1	G	-35	Col-0	104596	pUBC-YFP-mod2	FALSE
col_4_teb_1_LB_4_104596_pUBC-YFP-mod2	wt	3	208	1	TRUE	1:25636993	forward	1	25636993	LB	LZ156_13	0		4	CTTT	-28	Col-0	104596	pUBC-YFP-mod2	FALSE
col_4_teb_1_LB_4_104596_pUBC-YFP-mod2	wt	3	254	1	TRUE	1:25726073	reverse	1	25726073	LB	LZ156_13	0		1	T	-47	Col-0	104596	pUBC-YFP-mod2	FALSE
col_4_teb_1_LB_4_104596_pUBC-YFP-mod2	wt	6	201	1	TRUE	1:26323265	forward	1	26323265	LB	LZ156_13	0		3	GGA	-23	Col-0	104596	pUBC-YFP-mod2	FALSE
col_4_teb_1_LB_4_104596_pUBC-YFP-mod2	wt	4	267	1	TRUE	1:27209603	forward	1	27209603	LB	LZ156_13	0		1	A	-26	Col-0	104596	pUBC-YFP-mod2	FALSE
col_4_teb_1_LB_4_104596_pUBC-YFP-mod2	wt	4	149	1	TRUE	1:27372650	reverse	1	27372650	LB	LZ156_13	0		4	ACCT	-47	Col-0	104596	pUBC-YFP-mod2	FALSE
col_4_teb_1_LB_4_104596_pUBC-YFP-mod2	wt	4	217	1	TRUE	1:27803003	forward	1	27803003	LB	LZ156_13	33	ACTTGATTCATCCAGGTGCTTTCAGGAGATTTT	0		-68	Col-0	104596	pUBC-YFP-mod2	FALSE
col_4_teb_1_LB_4_104596_pUBC-YFP-mod2	wt	3	249	1	TRUE	1:27929532	forward	1	27929532	LB	LZ156_13	3	ACC	0		-60	Col-0	104596	pUBC-YFP-mod2	FALSE
col_4_teb_1_LB_4_104596_pUBC-YFP-mod2	wt	3	169	1	TRUE	1:28134378	forward	1	28134378	LB	LZ156_13	2	CG	0		-31	Col-0	104596	pUBC-YFP-mod2	FALSE
col_4_teb_1_LB_4_104596_pUBC-YFP-mod2	wt	10	257	0.909091	TRUE	1:28218724	forward	1	28218724	LB	LZ156_13	0		4	ATTC	-41	Col-0	104596	pUBC-YFP-mod2	FALSE
col_4_teb_1_LB_4_104596_pUBC-YFP-mod2	wt	16	375	1	TRUE	1:28219038	forward	1	28219038	LB	LZ156_13	4	ATTC	0		-32	Col-0	104596	pUBC-YFP-mod2	FALSE
col_4_teb_1_LB_4_104596_pUBC-YFP-mod2	wt	19	279	1	TRUE	1:28219048	reverse	1	28219048	LB	LZ156_13	0		4	AACT	-52	Col-0	104596	pUBC-YFP-mod2	FALSE
col_4_teb_1_LB_4_104596_pUBC-YFP-mod2	wt	4	242	1	TRUE	1:28343946	reverse	1	28343946	LB	LZ156_13	0		0		-53	Col-0	104596	pUBC-YFP-mod2	FALSE
col_4_teb_1_LB_4_104596_pUBC-YFP-mod2	wt	3	292	1	TRUE	1:28448142	reverse	1	28448142	LB	LZ156_13	30	AGTGGACTGACCTTGAGACATGTCCTTTAA	0		-38	Col-0	104596	pUBC-YFP-mod2	FALSE
col_4_teb_1_LB_4_104596_pUBC-YFP-mod2	wt	5	201	1	TRUE	1:28454335	forward	1	28454335	LB	LZ156_13	0		2	CA	-40	Col-0	104596	pUBC-YFP-mod2	FALSE
col_4_teb_1_LB_4_104596_pUBC-YFP-mod2	wt	5	191	1	TRUE	1:28596436	forward	1	28596436	LB	LZ156_13	2	AA	0		-31	Col-0	104596	pUBC-YFP-mod2	FALSE
col_4_teb_1_LB_4_104596_pUBC-YFP-mod2	wt	6	302	1	TRUE	1:29743510	forward	1	29743510	LB	LZ156_13	4	GAAA	0		-37	Col-0	104596	pUBC-YFP-mod2	FALSE
col_4_teb_1_LB_4_104596_pUBC-YFP-mod2	wt	3	262	1	TRUE	1:29872790	forward	1	29872790	LB	LZ156_13	4	AGGT	0		-34	Col-0	104596	pUBC-YFP-mod2	FALSE
col_4_teb_1_LB_4_104596_pUBC-YFP-mod2	wt	10	225	0.8	TRUE	1:29909872	forward	1	29909872	LB	LZ156_13	10	CGATGATTAT	0		-45	Col-0	104596	pUBC-YFP-mod2	FALSE
col_4_teb_1_LB_4_104596_pUBC-YFP-mod2	wt	4	275	1	TRUE	1:29922972	reverse	1	29922972	LB	LZ156_13	0		3	TCA	-26	Col-0	104596	pUBC-YFP-mod2	FALSE
col_4_teb_1_LB_4_104596_pUBC-YFP-mod2	wt	4	260	0.75	TRUE	1:486681	reverse	1	486681	LB	LZ156_13	9	AGTCTAATT	0		-26	Col-0	104596	pUBC-YFP-mod2	FALSE
col_4_teb_1_LB_4_104596_pUBC-YFP-mod2	wt	3	240	1	TRUE	1:22713271	reverse	1	22713271	LB	LZ156_13	22	TCAGGAGGTTTCAGGAGGTGCG	0		-1	Col-0	104596	pUBC-YFP-mod2	FALSE
col_4_teb_1_LB_4_104596_pUBC-YFP-mod2	wt	93	463	0.892473	TRUE	1:8314979	reverse	1	8314979	LB	LZ156_13	13	GTGTTACCTTGTT	0		-8	Col-0	104596	pUBC-YFP-mod2	FALSE
col_4_teb_1_LB_4_104596_pUBC-YFP-mod2	wt	5	217	0.8	TRUE	1:16925008	reverse	1	16925008	LB	LZ156_13	0		4	ACAC	-14	Col-0	104596	pUBC-YFP-mod2	FALSE
col_4_teb_1_LB_4_104596_pUBC-YFP-mod2	wt	7	333	1	TRUE	1:23335492	reverse	1	23335492	LB	LZ156_13	6	TCCAGG	0		-15	Col-0	104596	pUBC-YFP-mod2	FALSE
col_4_teb_1_LB_4_104596_pUBC-YFP-mod2	wt	7	420	0.857143	TRUE	1:2475048	reverse	1	2475048	LB	LZ156_13	0		0		-12	Col-0	104596	pUBC-YFP-mod2	FALSE
col_4_teb_1_LB_4_104596_pUBC-YFP-mod2	wt	3	195	1	TRUE	1:29768846	reverse	1	29768846	LB	LZ156_13	2	TC	0		-17	Col-0	104596	pUBC-YFP-mod2	FALSE
col_4_teb_1_LB_4_104596_pUBC-YFP-mod2	wt	19	341	0.894737	TRUE	1:10243666	reverse	1	10243666	LB	LZ156_13	4	GCTG	0		-14	Col-0	104596	pUBC-YFP-mod2	FALSE
col_4_teb_1_LB_4_104596_pUBC-YFP-mod2	wt	3	281	1	TRUE	1:17133619	forward	1	17133619	LB	LZ156_13	0		4	ACCA	-12	Col-0	104596	pUBC-YFP-mod2	FALSE
col_4_teb_1_LB_4_104596_pUBC-YFP-mod2	wt	3	229	1	TRUE	1:3753728	reverse	1	3753728	LB	LZ156_13	0		3	CTG	0	Col-0	104596	pUBC-YFP-mod2	FALSE
col_4_teb_1_LB_4_104596_pUBC-YFP-mod2	wt	6	183	1	TRUE	1:883433	reverse	1	883433	LB	LZ156_13	5	ATTCG	0		-5	Col-0	104596	pUBC-YFP-mod2	FALSE
col_4_teb_1_LB_4_104596_pUBC-YFP-mod2	wt	11	414	0.909091	TRUE	1:178303	forward	1	178303	LB	LZ156_13	2	TC	0		-8	Col-0	104596	pUBC-YFP-mod2	FALSE
col_4_teb_1_LB_4_104596_pUBC-YFP-mod2	wt	9	359	0.909091	TRUE	1:1434439	reverse	1	1434439	LB	LZ156_13	0		2	TC	-3	Col-0	104596	pUBC-YFP-mod2	FALSE
col_4_teb_1_LB_4_104596_pUBC-YFP-mod2	wt	10	339	1	TRUE	1:6522049	forward	1	6522049	LB	LZ156_13	0		3	CTG	0	Col-0	104596	pUBC-YFP-mod2	FALSE
col_4_teb_1_LB_4_104596_pUBC-YFP-mod2	wt	13	338	1	TRUE	1:26923489	reverse	1	26923489	LB	LZ156_13	0		2	AC	-14	Col-0	104596	pUBC-YFP-mod2	FALSE
col_4_teb_1_LB_4_104596_pUBC-YFP-mod2	wt	4	223	1	TRUE	1:29224721	reverse	1	29224721	LB	LZ156_13	0		6	GAGGTT	-19	Col-0	104596	pUBC-YFP-mod2	FALSE
col_4_teb_1_LB_4_104596_pUBC-YFP-mod2	wt	3	165	1	TRUE	1:6862490	forward	1	6862490	LB	LZ156_13	7	CATCACG	0		-7	Col-0	104596	pUBC-YFP-mod2	FALSE
col_4_teb_1_LB_4_104596_pUBC-YFP-mod2	wt	6	234	0.833333	TRUE	1:28184760	forward	1	28184760	LB	LZ156_13	0		1	T	-19	Col-0	104596	pUBC-YFP-mod2	FALSE
col_4_teb_1_LB_4_104596_pUBC-YFP-mod2	wt	7	355	1	TRUE	1:130567	reverse	1	130567	LB	LZ156_13	0		0		-4	Col-0	104596	pUBC-YFP-mod2	FALSE
col_4_teb_1_LB_4_104596_pUBC-YFP-mod2	wt	4	333	1	TRUE	1:227245	forward	1	227245	LB	LZ156_13	0		4	CCAC	-11	Col-0	104596	pUBC-YFP-mod2	FALSE
col_4_teb_1_LB_4_104596_pUBC-YFP-mod2	wt	5	204	0.8	TRUE	1:26278634	forward	1	26278634	LB	LZ156_13	0		3	ATA	-5	Col-0	104596	pUBC-YFP-mod2	FALSE
col_4_teb_1_LB_4_104596_pUBC-YFP-mod2	wt	8	298	0.875	TRUE	1:25532001	reverse	1	25532001	LB	LZ156_13	0		4	TACA	-15	Col-0	104596	pUBC-YFP-mod2	FALSE
col_4_teb_1_LB_4_104596_pUBC-YFP-mod2	wt	3	280	1	TRUE	1:5379435	forward	1	5379435	LB	LZ156_13	0		6	ACAATA	-7	Col-0	104596	pUBC-YFP-mod2	FALSE
col_4_teb_1_LB_4_104596_pUBC-YFP-mod2	wt	8	269	1	TRUE	1:1467419	reverse	1	1467419	LB	LZ156_13	0		1	T	-4	Col-0	104596	pUBC-YFP-mod2	FALSE
col_4_teb_1_LB_4_104596_pUBC-YFP-mod2	wt	5	181	1	TRUE	1:28380278	reverse	1	28380278	LB	LZ156_13	0		2	AT	-6	Col-0	104596	pUBC-YFP-mod2	FALSE
col_4_teb_1_LB_4_104596_pUBC-YFP-mod2	wt	5	255	0.8	TRUE	1:523337	forward	1	523337	LB	LZ156_13	0		2	TT	-19	Col-0	104596	pUBC-YFP-mod2	FALSE
col_4_teb_1_LB_4_104596_pUBC-YFP-mod2	wt	15	571	0.933333	TRUE	1:1341702	forward	1	1341702	LB	LZ156_13	0		3	GTT	-19	Col-0	104596	pUBC-YFP-mod2	FALSE
col_4_teb_1_LB_4_104596_pUBC-YFP-mod2	wt	10	224	0.9	TRUE	1:25531983	forward	1	25531983	LB	LZ156_13	0		5	CACAA	-9	Col-0	104596	pUBC-YFP-mod2	FALSE
col_4_teb_1_LB_4_104596_pUBC-YFP-mod2	wt	5	178	1	TRUE	1:20984235	reverse	1	20984235	LB	LZ156_13	0		2	CA	-10	Col-0	104596	pUBC-YFP-mod2	FALSE
col_4_teb_1_LB_4_104596_pUBC-YFP-mod2	wt	3	214	1	TRUE	1:19572208	reverse	1	19572208	LB	LZ156_13	19	TTCAACACAATATATCCTG	0		0	Col-0	104596	pUBC-YFP-mod2	FALSE
col_4_teb_1_LB_4_104596_pUBC-YFP-mod2	wt	3	145	1	TRUE	1:6180110	reverse	1	6180110	LB	LZ156_13	0		2	CA	-12	Col-0	104596	pUBC-YFP-mod2	FALSE
col_4_teb_1_LB_4_104596_pUBC-YFP-mod2	wt	3	361	1	TRUE	1:4820169	forward	1	4820169	LB	LZ156_13	0		3	CTG	0	Col-0	104596	pUBC-YFP-mod2	FALSE
col_4_teb_1_LB_4_104596_pUBC-YFP-mod2	wt	9	306	0.888889	TRUE	1:6444143	reverse	1	6444143	LB	LZ156_13	5	CCCAA	0		-19	Col-0	104596	pUBC-YFP-mod2	FALSE
col_4_teb_1_LB_4_104596_pUBC-YFP-mod2	wt	19	351	0.894737	TRUE	1:2440372	reverse	1	2440372	LB	LZ156_13	0		10	GTTCACACCA	-12	Col-0	104596	pUBC-YFP-mod2	FALSE
col_4_teb_1_LB_4_104596_pUBC-YFP-mod2	wt	3	122	1	TRUE	1:28749095	reverse	1	28749095	LB	LZ156_13	0		2	AT	-8	Col-0	104596	pUBC-YFP-mod2	FALSE
col_4_teb_1_LB_4_104596_pUBC-YFP-mod2	wt	7	557	0.857143	TRUE	1:20604258	reverse	1	20604258	LB	LZ156_13	4	TTTG	0		-15	Col-0	104596	pUBC-YFP-mod2	FALSE
col_4_teb_1_LB_4_104596_pUBC-YFP-mod2	wt	8	346	0.875	TRUE	1:13547391	reverse	1	13547391	LB	LZ156_13	0		3	ATC	-3	Col-0	104596	pUBC-YFP-mod2	FALSE
col_4_teb_1_LB_4_104596_pUBC-YFP-mod2	wt	3	279	1	TRUE	1:23256632	reverse	1	23256632	LB	LZ156_13	0		1	G	0	Col-0	104596	pUBC-YFP-mod2	FALSE
col_4_teb_1_LB_4_104596_pUBC-YFP-mod2	wt	6	439	1	TRUE	1:1155264	reverse	1	1155264	LB	LZ156_13	6	TGGCGG	0		-6	Col-0	104596	pUBC-YFP-mod2	FALSE
col_4_teb_1_LB_4_104596_pUBC-YFP-mod2	wt	5	181	0.8	TRUE	1:27346925	forward	1	27346925	LB	LZ156_13	0		4	CTGC	1	Col-0	104596	pUBC-YFP-mod2	FALSE
col_4_teb_1_LB_4_104596_pUBC-YFP-mod2	wt	5	351	1	TRUE	1:30009615	reverse	1	30009615	LB	LZ156_13	0		0		-21	Col-0	104596	pUBC-YFP-mod2	FALSE
col_4_teb_1_LB_4_104596_pUBC-YFP-mod2	wt	4	381	0.75	TRUE	1:3025475	forward	1	3025475	LB	LZ156_13	0		5	AATAT	-6	Col-0	104596	pUBC-YFP-mod2	FALSE
col_4_teb_1_LB_4_104596_pUBC-YFP-mod2	wt	3	160	1	TRUE	1:28992378	reverse	1	28992378	LB	LZ156_13	0		4	TTTA	-17	Col-0	104596	pUBC-YFP-mod2	FALSE
col_4_teb_1_LB_4_104596_pUBC-YFP-mod2	wt	3	232	1	TRUE	1:73875	forward	1	73875	LB	LZ156_13	0		2	CA	-15	Col-0	104596	pUBC-YFP-mod2	FALSE
col_4_teb_1_LB_4_104596_pUBC-YFP-mod2	wt	4	186	1	TRUE	1:5738480	forward	1	5738480	LB	LZ156_13	0		3	GGT	-20	Col-0	104596	pUBC-YFP-mod2	FALSE
col_4_teb_1_LB_4_104596_pUBC-YFP-mod2	wt	4	93	1	TRUE	1:12977946	reverse	1	12977946	LB	LZ156_13	18	GCTGATAATTCAATCCAG	0		-9	Col-0	104596	pUBC-YFP-mod2	FALSE
col_4_teb_1_LB_4_104596_pUBC-YFP-mod2	wt	3	221	1	TRUE	1:9225773	forward	1	9225773	LB	LZ156_13	0		1	T	-8	Col-0	104596	pUBC-YFP-mod2	FALSE
col_4_teb_1_LB_4_104596_pUBC-YFP-mod2	wt	7	236	1	TRUE	1:23211831	reverse	1	23211831	LB	LZ156_13	10	AATGCCTCGA	0		-26	Col-0	104596	pUBC-YFP-mod2	FALSE
col_4_teb_1_LB_4_104596_pUBC-YFP-mod2	wt	4	106	1	TRUE	1:3929691	reverse	1	3929691	LB	LZ156_13	0		2	TG	0	Col-0	104596	pUBC-YFP-mod2	FALSE
col_4_teb_1_LB_4_104596_pUBC-YFP-mod2	wt	5	280	0.8	TRUE	1:11572210	reverse	1	11572210	LB	LZ156_13	0		3	AAT	-8	Col-0	104596	pUBC-YFP-mod2	FALSE
col_4_teb_1_LB_4_104596_pUBC-YFP-mod2	wt	5	131	0.8	TRUE	1:3377033	forward	1	3377033	LB	LZ156_13	1	C	0		2	Col-0	104596	pUBC-YFP-mod2	FALSE
col_4_teb_1_LB_4_104596_pUBC-YFP-mod2	wt	5	219	1	TRUE	1:17786841	reverse	1	17786841	LB	LZ156_13	0		4	CCTG	0	Col-0	104596	pUBC-YFP-mod2	FALSE
col_4_teb_1_LB_4_104596_pUBC-YFP-mod2	wt	6	283	1	TRUE	1:20260010	reverse	1	20260010	LB	LZ156_13	7	GTAAAAG	0		-20	Col-0	104596	pUBC-YFP-mod2	FALSE
col_4_teb_1_LB_4_104596_pUBC-YFP-mod2	wt	4	169	1	TRUE	1:309541	forward	1	309541	LB	LZ156_13	5	TACCG	0		-17	Col-0	104596	pUBC-YFP-mod2	FALSE
col_4_teb_1_LB_4_104596_pUBC-YFP-mod2	wt	4	508	0.8	TRUE	1:4633486	reverse	1	4633486	LB	LZ156_13	11	AAAACTCTGCA	0		0	Col-0	104596	pUBC-YFP-mod2	FALSE
col_4_teb_1_LB_4_104596_pUBC-YFP-mod2	wt	3	217	1	TRUE	1:27820193	reverse	1	27820193	LB	LZ156_13	8	GAACCTTA	0		-9	Col-0	104596	pUBC-YFP-mod2	FALSE
col_4_teb_1_LB_4_104596_pUBC-YFP-mod2	wt	3	252	1	TRUE	1:10620519	forward	1	10620519	LB	LZ156_13	0		2	AT	-8	Col-0	104596	pUBC-YFP-mod2	FALSE
col_4_teb_1_LB_4_104596_pUBC-YFP-mod2	wt	5	256	1	TRUE	1:13876649	forward	1	13876649	LB	LZ156_13	6	ATGCAT	0		0	Col-0	104596	pUBC-YFP-mod2	FALSE
col_4_teb_1_LB_4_104596_pUBC-YFP-mod2	wt	5	184	1	TRUE	1:2099936	forward	1	2099936	LB	LZ156_13	10	GCTTCAGGAG	0		-5	Col-0	104596	pUBC-YFP-mod2	FALSE
col_4_teb_1_LB_4_104596_pUBC-YFP-mod2	wt	4	498	1	TRUE	1:20224340	reverse	1	20224340	LB	LZ156_13	0		2	TT	-18	Col-0	104596	pUBC-YFP-mod2	FALSE
col_4_teb_1_LB_4_104596_pUBC-YFP-mod2	wt	4	156	0.75	TRUE	1:11840687	reverse	1	11840687	LB	LZ156_13	10	AAGTTTGCGC	0		-5	Col-0	104596	pUBC-YFP-mod2	FALSE
col_4_teb_1_LB_4_104596_pUBC-YFP-mod2	wt	6	181	1	TRUE	1:6280493	forward	1	6280493	LB	LZ156_13	0		6	TCCTGC	1	Col-0	104596	pUBC-YFP-mod2	FALSE
col_4_teb_1_LB_4_104596_pUBC-YFP-mod2	wt	3	238	1	TRUE	1:9342181	reverse	1	9342181	LB	LZ156_13	5	TTGAT	0		0	Col-0	104596	pUBC-YFP-mod2	FALSE
col_4_teb_1_LB_4_104596_pUBC-YFP-mod2	wt	4	132	0.75	TRUE	1:11911491	forward	1	11911491	LB	LZ156_13	16	CCTCAGAACTGACCTG	0		-11	Col-0	104596	pUBC-YFP-mod2	FALSE
col_4_teb_1_LB_4_104596_pUBC-YFP-mod2	wt	6	222	0.833333	TRUE	1:8687598	forward	1	8687598	LB	LZ156_13	0		3	AAT	-8	Col-0	104596	pUBC-YFP-mod2	FALSE
col_4_teb_1_LB_4_104596_pUBC-YFP-mod2	wt	3	235	1	TRUE	1:25333099	forward	1	25333099	LB	LZ156_13	20	GAGGTTTACACTACTGAATT	0		-5	Col-0	104596	pUBC-YFP-mod2	FALSE
col_4_teb_1_LB_4_104596_pUBC-YFP-mod2	wt	3	294	1	TRUE	1:523246	forward	1	523246	LB	LZ156_13	11	CAAGTACTAGT	0		-5	Col-0	104596	pUBC-YFP-mod2	FALSE
col_4_teb_1_LB_4_104596_pUBC-YFP-mod2	wt	4	237	1	TRUE	1:29365438	reverse	1	29365438	LB	LZ156_13	0		2	AT	-8	Col-0	104596	pUBC-YFP-mod2	FALSE
col_4_teb_1_LB_4_104596_pUBC-YFP-mod2	wt	3	299	1	TRUE	1:9225775	reverse	1	9225775	LB	LZ156_13	0		0		0	Col-0	104596	pUBC-YFP-mod2	FALSE
col_4_teb_1_LB_4_104596_pUBC-YFP-mod2	wt	4	295	1	TRUE	1:17716550	reverse	1	17716550	LB	LZ156_13	15	TTGATTCATCCAGGT	0		-13	Col-0	104596	pUBC-YFP-mod2	FALSE
col_4_teb_1_LB_4_104596_pUBC-YFP-mod2	wt	3	205	1	TRUE	1:1965491	forward	1	1965491	LB	LZ156_13	0		7	CCACAAT	-8	Col-0	104596	pUBC-YFP-mod2	FALSE
col_4_teb_1_LB_4_104596_pUBC-YFP-mod2	wt	4	354	0.75	TRUE	1:21016251	forward	1	21016251	LB	LZ156_13	0		0		-9	Col-0	104596	pUBC-YFP-mod2	FALSE
col_4_teb_1_LB_4_104596_pUBC-YFP-mod2	wt	5	458	1	TRUE	1:27360488	reverse	1	27360488	LB	LZ156_13	0		3	ACC	-13	Col-0	104596	pUBC-YFP-mod2	FALSE
col_4_teb_1_LB_4_104596_pUBC-YFP-mod2	wt	3	325	1	TRUE	2:97664	forward	2	97664	LB	LZ156_13	0		4	CTTT	-28	Col-0	104596	pUBC-YFP-mod2	FALSE
col_4_teb_1_LB_4_104596_pUBC-YFP-mod2	wt	6	161	0.833333	TRUE	2:266370	forward	2	266370	LB	LZ156_13	0		0		-35	Col-0	104596	pUBC-YFP-mod2	FALSE
col_4_teb_1_LB_4_104596_pUBC-YFP-mod2	wt	12	242	1	TRUE	2:440887	forward	2	440887	LB	LZ156_13	0		2	CT	-30	Col-0	104596	pUBC-YFP-mod2	FALSE
col_4_teb_1_LB_4_104596_pUBC-YFP-mod2	wt	9	165	1	TRUE	2:504165	reverse	2	504165	LB	LZ156_13	5	CTTGT	0		-55	Col-0	104596	pUBC-YFP-mod2	FALSE
col_4_teb_1_LB_4_104596_pUBC-YFP-mod2	wt	5	204	1	TRUE	2:2424404	forward	2	2424404	LB	LZ156_13	3	TTC	0		-41	Col-0	104596	pUBC-YFP-mod2	FALSE
col_4_teb_1_LB_4_104596_pUBC-YFP-mod2	wt	4	170	1	TRUE	2:5941631	forward	2	5941631	LB	LZ156_13	2	AC	0		-64	Col-0	104596	pUBC-YFP-mod2	FALSE
col_4_teb_1_LB_4_104596_pUBC-YFP-mod2	wt	7	363	0.857143	TRUE	2:8057323	forward	2	8057323	LB	LZ156_13	6	TTACAA	0		-26	Col-0	104596	pUBC-YFP-mod2	FALSE
col_4_teb_1_LB_4_104596_pUBC-YFP-mod2	wt	3	273	1	TRUE	2:9955947	forward	2	9955947	LB	LZ156_13	0		0		-51	Col-0	104596	pUBC-YFP-mod2	FALSE
col_4_teb_1_LB_4_104596_pUBC-YFP-mod2	wt	8	379	1	TRUE	2:11666815	reverse	2	11666815	LB	LZ156_13	0		4	TTGA	-44	Col-0	104596	pUBC-YFP-mod2	FALSE
col_4_teb_1_LB_4_104596_pUBC-YFP-mod2	wt	23	354	0.833333	TRUE	2:12249421	reverse	2	12249421	LB	LZ156_13	0		4	TCAT	-39	Col-0	104596	pUBC-YFP-mod2	FALSE
col_4_teb_1_LB_4_104596_pUBC-YFP-mod2	wt	6	323	1	TRUE	2:12302359	forward	2	12302359	LB	LZ156_13	0		3	TGC	-31	Col-0	104596	pUBC-YFP-mod2	FALSE
col_4_teb_1_LB_4_104596_pUBC-YFP-mod2	wt	14	329	0.785714	TRUE	2:13928573	forward	2	13928573	LB	LZ156_13	15	TCCAGGTGCTCTTGT	0		-15	Col-0	104596	pUBC-YFP-mod2	FALSE
col_4_teb_1_LB_4_104596_pUBC-YFP-mod2	wt	3	122	1	TRUE	2:14018588	forward	2	14018588	LB	LZ156_13	0		0		-27	Col-0	104596	pUBC-YFP-mod2	FALSE
col_4_teb_1_LB_4_104596_pUBC-YFP-mod2	wt	4	239	1	TRUE	2:15282253	reverse	2	15282253	LB	LZ156_13	0		3	TCA	-40	Col-0	104596	pUBC-YFP-mod2	FALSE
col_4_teb_1_LB_4_104596_pUBC-YFP-mod2	wt	10	258	1	TRUE	2:15649521	reverse	2	15649521	LB	LZ156_13	0		3	CTT	-29	Col-0	104596	pUBC-YFP-mod2	FALSE
col_4_teb_1_LB_4_104596_pUBC-YFP-mod2	wt	4	136	1	TRUE	2:16198327	forward	2	16198327	LB	LZ156_13	0		5	TGATT	-42	Col-0	104596	pUBC-YFP-mod2	FALSE
col_4_teb_1_LB_4_104596_pUBC-YFP-mod2	wt	4	160	1	TRUE	2:16308829	forward	2	16308829	LB	LZ156_13	0		3	CGA	-55	Col-0	104596	pUBC-YFP-mod2	FALSE
col_4_teb_1_LB_4_104596_pUBC-YFP-mod2	wt	3	105	1	TRUE	2:16308897	reverse	2	16308897	LB	LZ156_13	4	TTAC	0		-35	Col-0	104596	pUBC-YFP-mod2	FALSE
col_4_teb_1_LB_4_104596_pUBC-YFP-mod2	wt	3	336	1	TRUE	2:16549699	forward	2	16549699	LB	LZ156_13	18	ATATCCACAAAAATACTT	0		-38	Col-0	104596	pUBC-YFP-mod2	FALSE
col_4_teb_1_LB_4_104596_pUBC-YFP-mod2	wt	5	361	1	TRUE	2:17002497	forward	2	17002497	LB	LZ156_13	55	GACAGGTGGAATGGCCAATTATAACCTCAAATCCATGACTAAATTCATAACCTCA	0		-64	Col-0	104596	pUBC-YFP-mod2	FALSE
col_4_teb_1_LB_4_104596_pUBC-YFP-mod2	wt	4	249	0.75	TRUE	2:17002564	reverse	2	17002564	LB	LZ156_13	7	TAGCCTT	0		-68	Col-0	104596	pUBC-YFP-mod2	FALSE
col_4_teb_1_LB_4_104596_pUBC-YFP-mod2	wt	4	366	1	TRUE	2:17003942	forward	2	17003942	LB	LZ156_13	2	TA	0		-38	Col-0	104596	pUBC-YFP-mod2	FALSE
col_4_teb_1_LB_4_104596_pUBC-YFP-mod2	wt	3	112	1	TRUE	2:17032305	forward	2	17032305	LB	LZ156_13	5	TCTCA	0		-58	Col-0	104596	pUBC-YFP-mod2	FALSE
col_4_teb_1_LB_4_104596_pUBC-YFP-mod2	wt	8	263	1	TRUE	2:17082378	forward	2	17082378	LB	LZ156_13	0		2	TC	-38	Col-0	104596	pUBC-YFP-mod2	FALSE
col_4_teb_1_LB_4_104596_pUBC-YFP-mod2	wt	6	172	1	TRUE	2:17087799	forward	2	17087799	LB	LZ156_13	0		1	T	-30	Col-0	104596	pUBC-YFP-mod2	FALSE
col_4_teb_1_LB_4_104596_pUBC-YFP-mod2	wt	4	327	0.75	TRUE	2:17422492	reverse	2	17422492	LB	LZ156_13	0		3	CTT	-29	Col-0	104596	pUBC-YFP-mod2	FALSE
col_4_teb_1_LB_4_104596_pUBC-YFP-mod2	wt	8	479	0.875	TRUE	2:17532829	forward	2	17532829	LB	LZ156_13	5	ATTCA	0		-32	Col-0	104596	pUBC-YFP-mod2	FALSE
col_4_teb_1_LB_4_104596_pUBC-YFP-mod2	wt	7	266	0.857143	TRUE	2:17592041	reverse	2	17592041	LB	LZ156_13	0		3	GGT	-33	Col-0	104596	pUBC-YFP-mod2	FALSE
col_4_teb_1_LB_4_104596_pUBC-YFP-mod2	wt	3	383	1	TRUE	2:17688415	forward	2	17688415	LB	LZ156_13	1	G	0		-34	Col-0	104596	pUBC-YFP-mod2	FALSE
col_4_teb_1_LB_4_104596_pUBC-YFP-mod2	wt	7	216	1	TRUE	2:17778118	forward	2	17778118	LB	LZ156_13	0		3	TTG	-45	Col-0	104596	pUBC-YFP-mod2	FALSE
col_4_teb_1_LB_4_104596_pUBC-YFP-mod2	wt	3	128	1	TRUE	2:18839929	reverse	2	18839929	LB	LZ156_13	0		3	CAG	-25	Col-0	104596	pUBC-YFP-mod2	FALSE
col_4_teb_1_LB_4_104596_pUBC-YFP-mod2	wt	3	154	1	TRUE	2:19191172	forward	2	19191172	LB	LZ156_13	8	CTTTACAC	0		-34	Col-0	104596	pUBC-YFP-mod2	FALSE
col_4_teb_1_LB_4_104596_pUBC-YFP-mod2	wt	6	453	1	TRUE	2:19447859	forward	2	19447859	LB	LZ156_13	0		3	CAT	-39	Col-0	104596	pUBC-YFP-mod2	FALSE
col_4_teb_1_LB_4_104596_pUBC-YFP-mod2	wt	18	406	1	TRUE	2:19607314	forward	2	19607314	LB	LZ156_13	0		2	CA	-26	Col-0	104596	pUBC-YFP-mod2	FALSE
col_4_teb_1_LB_4_104596_pUBC-YFP-mod2	wt	25	351	0.96	TRUE	2:19607355	reverse	2	19607355	LB	LZ156_13	0		1	C	-49	Col-0	104596	pUBC-YFP-mod2	FALSE
col_4_teb_1_LB_4_104596_pUBC-YFP-mod2	wt	4	242	1	TRUE	2:14253333	reverse	2	14253333	LB	LZ156_13	0		5	GGTTT	-18	Col-0	104596	pUBC-YFP-mod2	FALSE
col_4_teb_1_LB_4_104596_pUBC-YFP-mod2	wt	7	362	1	TRUE	2:19191278	reverse	2	19191278	LB	LZ156_13	0		5	CAATA	-7	Col-0	104596	pUBC-YFP-mod2	FALSE
col_4_teb_1_LB_4_104596_pUBC-YFP-mod2	wt	6	328	1	TRUE	2:13222145	forward	2	13222145	LB	LZ156_13	0		3	CAA	-9	Col-0	104596	pUBC-YFP-mod2	FALSE
col_4_teb_1_LB_4_104596_pUBC-YFP-mod2	wt	8	357	0.875	TRUE	2:6215903	forward	2	6215903	LB	LZ156_13	0		4	CCAC	-11	Col-0	104596	pUBC-YFP-mod2	FALSE
col_4_teb_1_LB_4_104596_pUBC-YFP-mod2	wt	16	237	0.875	TRUE	2:17443877	forward	2	17443877	LB	LZ156_13	8	ATAACGTT	0		-9	Col-0	104596	pUBC-YFP-mod2	FALSE
col_4_teb_1_LB_4_104596_pUBC-YFP-mod2	wt	3	193	1	TRUE	2:13146238	forward	2	13146238	LB	LZ156_13	5	TAGAA	0		-18	Col-0	104596	pUBC-YFP-mod2	FALSE
col_4_teb_1_LB_4_104596_pUBC-YFP-mod2	wt	34	335	0.823529	TRUE	2:16152354	forward	2	16152354	LB	LZ156_13	0		2	AA	-9	Col-0	104596	pUBC-YFP-mod2	FALSE
col_4_teb_1_LB_4_104596_pUBC-YFP-mod2	wt	14	452	0.857143	TRUE	2:13118179	forward	2	13118179	LB	LZ156_13	4	AGTC	0		-7	Col-0	104596	pUBC-YFP-mod2	FALSE
col_4_teb_1_LB_4_104596_pUBC-YFP-mod2	wt	4	303	0.75	TRUE	2:16330962	reverse	2	16330962	LB	LZ156_13	16	GAGCTTGGATCAGATG	0		-28	Col-0	104596	pUBC-YFP-mod2	FALSE
col_4_teb_1_LB_4_104596_pUBC-YFP-mod2	wt	12	442	0.857143	TRUE	2:3866499	forward	2	3866499	LB	LZ156_13	9	CAGTTCCCG	0		-11	Col-0	104596	pUBC-YFP-mod2	FALSE
col_4_teb_1_LB_4_104596_pUBC-YFP-mod2	wt	5	423	1	TRUE	2:9101417	reverse	2	9101417	LB	LZ156_13	0		10	TACACCACAA	-9	Col-0	104596	pUBC-YFP-mod2	FALSE
col_4_teb_1_LB_4_104596_pUBC-YFP-mod2	wt	5	313	1	TRUE	2:17592009	forward	2	17592009	LB	LZ156_13	0		1	G	-21	Col-0	104596	pUBC-YFP-mod2	FALSE
col_4_teb_1_LB_4_104596_pUBC-YFP-mod2	wt	7	233	0.857143	TRUE	2:16454699	forward	2	16454699	LB	LZ156_13	17	TGCCGGTCGATCTAGTA	0		-15	Col-0	104596	pUBC-YFP-mod2	FALSE
col_4_teb_1_LB_4_104596_pUBC-YFP-mod2	wt	4	182	1	TRUE	2:9095965	forward	2	9095965	LB	LZ156_13	0		2	TT	-18	Col-0	104596	pUBC-YFP-mod2	FALSE
col_4_teb_1_LB_4_104596_pUBC-YFP-mod2	wt	4	339	0.75	TRUE	2:11357013	forward	2	11357013	LB	LZ156_13	0		2	AC	-11	Col-0	104596	pUBC-YFP-mod2	FALSE
col_4_teb_1_LB_4_104596_pUBC-YFP-mod2	wt	5	197	1	TRUE	2:14474853	reverse	2	14474853	LB	LZ156_13	0		3	ACA	-10	Col-0	104596	pUBC-YFP-mod2	FALSE
col_4_teb_1_LB_4_104596_pUBC-YFP-mod2	wt	7	205	0.857143	TRUE	2:16836800	forward	2	16836800	LB	LZ156_13	3	AGA	0		-5	Col-0	104596	pUBC-YFP-mod2	FALSE
col_4_teb_1_LB_4_104596_pUBC-YFP-mod2	wt	9	363	1	TRUE	2:8142832	forward	2	8142832	LB	LZ156_13	0		0		-15	Col-0	104596	pUBC-YFP-mod2	FALSE
col_4_teb_1_LB_4_104596_pUBC-YFP-mod2	wt	9	317	0.8	TRUE	2:13928650	reverse	2	13928650	LB	LZ156_13	0		2	TA	-7	Col-0	104596	pUBC-YFP-mod2	FALSE
col_4_teb_1_LB_4_104596_pUBC-YFP-mod2	wt	18	354	1	TRUE	2:10431212	reverse	2	10431212	LB	LZ156_13	0		3	TTT	-18	Col-0	104596	pUBC-YFP-mod2	FALSE
col_4_teb_1_LB_4_104596_pUBC-YFP-mod2	wt	4	243	1	TRUE	2:6175107	forward	2	6175107	LB	LZ156_13	28	GTTGACATTGTCAACTTTGTACTTTAAG	0		-6	Col-0	104596	pUBC-YFP-mod2	FALSE
col_4_teb_1_LB_4_104596_pUBC-YFP-mod2	wt	7	262	0.857143	TRUE	2:15649492	forward	2	15649492	LB	LZ156_13	3	TTG	0		-11	Col-0	104596	pUBC-YFP-mod2	FALSE
col_4_teb_1_LB_4_104596_pUBC-YFP-mod2	wt	3	284	1	TRUE	2:7076862	forward	2	7076862	LB	LZ156_13	0		0		-5	Col-0	104596	pUBC-YFP-mod2	FALSE
col_4_teb_1_LB_4_104596_pUBC-YFP-mod2	wt	3	199	1	TRUE	2:17672247	forward	2	17672247	LB	LZ156_13	9	CTCAGGAGG	0		-25	Col-0	104596	pUBC-YFP-mod2	FALSE
col_4_teb_1_LB_4_104596_pUBC-YFP-mod2	wt	5	305	1	TRUE	2:16509938	reverse	2	16509938	LB	LZ156_13	0		1	T	-4	Col-0	104596	pUBC-YFP-mod2	FALSE
col_4_teb_1_LB_4_104596_pUBC-YFP-mod2	wt	6	269	0.833333	TRUE	2:17935819	reverse	2	17935819	LB	LZ156_13	0		2	AT	-6	Col-0	104596	pUBC-YFP-mod2	FALSE
col_4_teb_1_LB_4_104596_pUBC-YFP-mod2	wt	3	115	1	TRUE	2:15941529	reverse	2	15941529	LB	LZ156_13	3	TTC	0		-6	Col-0	104596	pUBC-YFP-mod2	FALSE
col_4_teb_1_LB_4_104596_pUBC-YFP-mod2	wt	3	281	1	TRUE	2:11600941	forward	2	11600941	LB	LZ156_13	0		4	ACAA	-9	Col-0	104596	pUBC-YFP-mod2	FALSE
col_4_teb_1_LB_4_104596_pUBC-YFP-mod2	wt	4	226	0.75	TRUE	2:2071980	reverse	2	2071980	LB	LZ156_13	0		3	ATC	-3	Col-0	104596	pUBC-YFP-mod2	FALSE
col_4_teb_1_LB_4_104596_pUBC-YFP-mod2	wt	4	442	1	TRUE	2:19435714	reverse	2	19435714	LB	LZ156_13	9	CCGAGGGGA	0		-20	Col-0	104596	pUBC-YFP-mod2	FALSE
col_4_teb_1_LB_4_104596_pUBC-YFP-mod2	wt	4	374	1	TRUE	2:454321	reverse	2	454321	LB	LZ156_13	0		0		0	Col-0	104596	pUBC-YFP-mod2	FALSE
col_4_teb_1_LB_4_104596_pUBC-YFP-mod2	wt	7	250	1	TRUE	2:19257298	forward	2	19257298	LB	LZ156_13	0		1	T	-19	Col-0	104596	pUBC-YFP-mod2	FALSE
col_4_teb_1_LB_4_104596_pUBC-YFP-mod2	wt	3	218	1	TRUE	2:8692678	reverse	2	8692678	LB	LZ156_13	0		4	TATC	-3	Col-0	104596	pUBC-YFP-mod2	FALSE
col_4_teb_1_LB_4_104596_pUBC-YFP-mod2	wt	4	153	1	TRUE	2:17420006	forward	2	17420006	LB	LZ156_13	36	GCCCTTTTAAATATCCGATTATTCTAATAAATGCAC	0		-14	Col-0	104596	pUBC-YFP-mod2	FALSE
col_4_teb_1_LB_4_104596_pUBC-YFP-mod2	wt	3	137	1	TRUE	2:2737187	forward	2	2737187	LB	LZ156_13	0		4	ACCA	-12	Col-0	104596	pUBC-YFP-mod2	FALSE
col_4_teb_1_LB_4_104596_pUBC-YFP-mod2	wt	3	142	1	TRUE	2:7606131	forward	2	7606131	LB	LZ156_13	11	AAAGCACCTGG	0		0	Col-0	104596	pUBC-YFP-mod2	FALSE
col_4_teb_1_LB_4_104596_pUBC-YFP-mod2	wt	3	232	1	TRUE	2:17041682	forward	2	17041682	LB	LZ156_13	1	C	0		-9	Col-0	104596	pUBC-YFP-mod2	FALSE
col_4_teb_1_LB_4_104596_pUBC-YFP-mod2	wt	3	285	1	TRUE	2:11491456	forward	2	11491456	LB	LZ156_13	0		6	TACACC	-13	Col-0	104596	pUBC-YFP-mod2	FALSE
col_4_teb_1_LB_4_104596_pUBC-YFP-mod2	wt	4	164	0.75	TRUE	2:15786559	forward	2	15786559	LB	LZ156_13	0		4	CAAT	-8	Col-0	104596	pUBC-YFP-mod2	FALSE
col_4_teb_1_LB_4_104596_pUBC-YFP-mod2	wt	3	107	1	TRUE	2:12631612	forward	2	12631612	LB	LZ156_13	13	TTCTATTTTAGAA	0		-10	Col-0	104596	pUBC-YFP-mod2	FALSE
col_4_teb_1_LB_4_104596_pUBC-YFP-mod2	wt	3	292	1	TRUE	2:4080729	forward	2	4080729	LB	LZ156_13	0		3	ACA	-10	Col-0	104596	pUBC-YFP-mod2	FALSE
col_4_teb_1_LB_4_104596_pUBC-YFP-mod2	wt	18	295	0.9	TRUE	3:34796	reverse	3	34796	LB	LZ156_13	3	GGA	0		-53	Col-0	104596	pUBC-YFP-mod2	FALSE
col_4_teb_1_LB_4_104596_pUBC-YFP-mod2	wt	5	363	0.8	TRUE	3:284489	reverse	3	284489	LB	LZ156_13	5	TCATC	0		-26	Col-0	104596	pUBC-YFP-mod2	FALSE
col_4_teb_1_LB_4_104596_pUBC-YFP-mod2	wt	5	155	1	TRUE	3:478917	forward	3	478917	LB	LZ156_13	0		3	TCC	-37	Col-0	104596	pUBC-YFP-mod2	FALSE
col_4_teb_1_LB_4_104596_pUBC-YFP-mod2	wt	8	226	0.75	TRUE	3:1072018	forward	3	1072018	LB	LZ156_13	0		2	GG	-21	Col-0	104596	pUBC-YFP-mod2	FALSE
col_4_teb_1_LB_4_104596_pUBC-YFP-mod2	wt	22	516	1	TRUE	3:1658063	reverse	3	1658063	LB	LZ156_13	0		3	GAG	-22	Col-0	104596	pUBC-YFP-mod2	FALSE
col_4_teb_1_LB_4_104596_pUBC-YFP-mod2	wt	4	269	0.75	TRUE	3:1862321	reverse	3	1862321	LB	LZ156_13	0		2	TC	-27	Col-0	104596	pUBC-YFP-mod2	FALSE
col_4_teb_1_LB_4_104596_pUBC-YFP-mod2	wt	8	180	1	TRUE	3:2197323	reverse	3	2197323	LB	LZ156_13	18	CCTGCCGGTGCCGCCCCG	0		-35	Col-0	104596	pUBC-YFP-mod2	FALSE
col_4_teb_1_LB_4_104596_pUBC-YFP-mod2	wt	4	145	1	TRUE	3:2309633	reverse	3	2309633	LB	LZ156_13	0		4	TCCA	-36	Col-0	104596	pUBC-YFP-mod2	FALSE
col_4_teb_1_LB_4_104596_pUBC-YFP-mod2	wt	10	186	0.8	TRUE	3:2419480	forward	3	2419480	LB	LZ156_13	0		5	TGCTT	-29	Col-0	104596	pUBC-YFP-mod2	FALSE
col_4_teb_1_LB_4_104596_pUBC-YFP-mod2	wt	4	241	1	TRUE	3:2636950	reverse	3	2636950	LB	LZ156_13	1	C	0		-35	Col-0	104596	pUBC-YFP-mod2	FALSE
col_4_teb_1_LB_4_104596_pUBC-YFP-mod2	wt	3	118	1	TRUE	3:3169184	reverse	3	3169184	LB	LZ156_13	3	CAA	0		-68	Col-0	104596	pUBC-YFP-mod2	FALSE
col_4_teb_1_LB_4_104596_pUBC-YFP-mod2	wt	3	309	1	TRUE	3:3651438	forward	3	3651438	LB	LZ156_13	0		1	G	-45	Col-0	104596	pUBC-YFP-mod2	FALSE
col_4_teb_1_LB_4_104596_pUBC-YFP-mod2	wt	4	193	1	TRUE	3:3695009	reverse	3	3695009	LB	LZ156_13	10	GGCGTTACTG	0		-41	Col-0	104596	pUBC-YFP-mod2	FALSE
col_4_teb_1_LB_4_104596_pUBC-YFP-mod2	wt	10	216	0.9	TRUE	3:4091435	reverse	3	4091435	LB	LZ156_13	12	GTCCGAATTGAC	0		-30	Col-0	104596	pUBC-YFP-mod2	FALSE
col_4_teb_1_LB_4_104596_pUBC-YFP-mod2	wt	5	381	1	TRUE	3:4243935	forward	3	4243935	LB	LZ156_13	0		3	TCC	-57	Col-0	104596	pUBC-YFP-mod2	FALSE
col_4_teb_1_LB_4_104596_pUBC-YFP-mod2	wt	3	181	1	TRUE	3:5096145	reverse	3	5096145	LB	LZ156_13	5	CCCGC	0		-34	Col-0	104596	pUBC-YFP-mod2	FALSE
col_4_teb_1_LB_4_104596_pUBC-YFP-mod2	wt	3	570	1	TRUE	3:5399173	reverse	3	5399173	LB	LZ156_13	0		4	AGGT	-33	Col-0	104596	pUBC-YFP-mod2	FALSE
col_4_teb_1_LB_4_104596_pUBC-YFP-mod2	wt	4	345	1	TRUE	3:5404648	reverse	3	5404648	LB	LZ156_13	0		3	TTT	-28	Col-0	104596	pUBC-YFP-mod2	FALSE
col_4_teb_1_LB_4_104596_pUBC-YFP-mod2	wt	11	409	0.909091	TRUE	3:5495281	forward	3	5495281	LB	LZ156_13	0		4	ATCC	-37	Col-0	104596	pUBC-YFP-mod2	FALSE
col_4_teb_1_LB_4_104596_pUBC-YFP-mod2	wt	15	345	0.866667	TRUE	3:5495296	reverse	3	5495296	LB	LZ156_13	19	AGCGTGGTCGCTGTCATCG	0		-34	Col-0	104596	pUBC-YFP-mod2	FALSE
col_4_teb_1_LB_4_104596_pUBC-YFP-mod2	wt	3	240	1	TRUE	3:6250505	reverse	3	6250505	LB	LZ156_13	0		2	AC	-49	Col-0	104596	pUBC-YFP-mod2	FALSE
col_4_teb_1_LB_4_104596_pUBC-YFP-mod2	wt	3	395	1	TRUE	3:6718887	reverse	3	6718887	LB	LZ156_13	7	CCTTGAT	0		-44	Col-0	104596	pUBC-YFP-mod2	FALSE
col_4_teb_1_LB_4_104596_pUBC-YFP-mod2	wt	9	295	1	TRUE	3:8376388	reverse	3	8376388	LB	LZ156_13	0		3	GCC	-62	Col-0	104596	pUBC-YFP-mod2	FALSE
col_4_teb_1_LB_4_104596_pUBC-YFP-mod2	wt	17	380	0.882353	TRUE	3:8945999	reverse	3	8945999	LB	LZ156_13	0		4	CTTT	-28	Col-0	104596	pUBC-YFP-mod2	FALSE
col_4_teb_1_LB_4_104596_pUBC-YFP-mod2	wt	3	176	1	TRUE	3:9964695	reverse	3	9964695	LB	LZ156_13	0		4	CATC	-38	Col-0	104596	pUBC-YFP-mod2	FALSE
col_4_teb_1_LB_4_104596_pUBC-YFP-mod2	wt	3	298	1	TRUE	3:10187406	forward	3	10187406	LB	LZ156_13	0		3	TTC	-27	Col-0	104596	pUBC-YFP-mod2	FALSE
col_4_teb_1_LB_4_104596_pUBC-YFP-mod2	wt	3	226	1	TRUE	3:10241911	reverse	3	10241911	LB	LZ156_13	0		1	C	-57	Col-0	104596	pUBC-YFP-mod2	FALSE
col_4_teb_1_LB_4_104596_pUBC-YFP-mod2	wt	16	307	0.9375	TRUE	3:10470474	reverse	3	10470474	LB	LZ156_13	0		3	AAT	-8	Col-0	104596	pUBC-YFP-mod2	FALSE
col_4_teb_1_LB_4_104596_pUBC-YFP-mod2	wt	4	320	1	TRUE	3:11866904	reverse	3	11866904	LB	LZ156_13	0		5	TTTCA	-26	Col-0	104596	pUBC-YFP-mod2	FALSE
col_4_teb_1_LB_4_104596_pUBC-YFP-mod2	wt	4	236	1	TRUE	3:12456621	reverse	3	12456621	LB	LZ156_13	0		4	TGCT	-30	Col-0	104596	pUBC-YFP-mod2	FALSE
col_4_teb_1_LB_4_104596_pUBC-YFP-mod2	wt	3	303	1	TRUE	3:15999026	reverse	3	15999026	LB	LZ156_13	0		2	GA	-23	Col-0	104596	pUBC-YFP-mod2	FALSE
col_4_teb_1_LB_4_104596_pUBC-YFP-mod2	wt	69	538	0.927536	TRUE	3:16981507	forward	3	16981507	LB	LZ156_13	14	AACGTTATTACTTT	0		-38	Col-0	104596	pUBC-YFP-mod2	FALSE
col_4_teb_1_LB_4_104596_pUBC-YFP-mod2	wt	3	216	1	TRUE	3:17459708	reverse	3	17459708	LB	LZ156_13	1	G	0		-28	Col-0	104596	pUBC-YFP-mod2	FALSE
col_4_teb_1_LB_4_104596_pUBC-YFP-mod2	wt	10	285	1	TRUE	3:18387266	reverse	3	18387266	LB	LZ156_13	0		1	A	-68	Col-0	104596	pUBC-YFP-mod2	FALSE
col_4_teb_1_LB_4_104596_pUBC-YFP-mod2	wt	5	343	0.8	TRUE	3:18439452	reverse	3	18439452	LB	LZ156_13	0		2	AG	-25	Col-0	104596	pUBC-YFP-mod2	FALSE
col_4_teb_1_LB_4_104596_pUBC-YFP-mod2	wt	10	247	0.9	TRUE	3:18494453	reverse	3	18494453	LB	LZ156_13	12	TGCTAGAGTCCG	0		-36	Col-0	104596	pUBC-YFP-mod2	FALSE
col_4_teb_1_LB_4_104596_pUBC-YFP-mod2	wt	4	420	1	TRUE	3:20338747	forward	3	20338747	LB	LZ156_13	19	CATGTGACAAAATTTTCAC	0		-44	Col-0	104596	pUBC-YFP-mod2	FALSE
col_4_teb_1_LB_4_104596_pUBC-YFP-mod2	wt	5	323	1	TRUE	3:21560066	forward	3	21560066	LB	LZ156_13	7	TATTGAG	0		-32	Col-0	104596	pUBC-YFP-mod2	FALSE
col_4_teb_1_LB_4_104596_pUBC-YFP-mod2	wt	6	343	0.833333	TRUE	3:22880831	reverse	3	22880831	LB	LZ156_13	0		4	GTTT	-18	Col-0	104596	pUBC-YFP-mod2	FALSE
col_4_teb_1_LB_4_104596_pUBC-YFP-mod2	wt	5	321	1	TRUE	3:22983717	reverse	3	22983717	LB	LZ156_13	0		4	GCTT	-29	Col-0	104596	pUBC-YFP-mod2	FALSE
col_4_teb_1_LB_4_104596_pUBC-YFP-mod2	wt	6	372	1	TRUE	3:23116096	forward	3	23116096	LB	LZ156_13	0		6	AACTGA	-50	Col-0	104596	pUBC-YFP-mod2	FALSE
col_4_teb_1_LB_4_104596_pUBC-YFP-mod2	wt	10	373	0.9	TRUE	3:2252420	forward	3	2252420	LB	LZ156_13	10	GCTTTCAGGA	0		-20	Col-0	104596	pUBC-YFP-mod2	FALSE
col_4_teb_1_LB_4_104596_pUBC-YFP-mod2	wt	4	236	1	TRUE	3:16374038	reverse	3	16374038	LB	LZ156_13	0		6	CAATAT	-6	Col-0	104596	pUBC-YFP-mod2	FALSE
col_4_teb_1_LB_4_104596_pUBC-YFP-mod2	wt	9	346	1	TRUE	3:12300727	forward	3	12300727	LB	LZ156_13	0		5	AATAT	-6	Col-0	104596	pUBC-YFP-mod2	FALSE
col_4_teb_1_LB_4_104596_pUBC-YFP-mod2	wt	9	302	1	TRUE	3:343547	forward	3	343547	LB	LZ156_13	0		2	AC	-11	Col-0	104596	pUBC-YFP-mod2	FALSE
col_4_teb_1_LB_4_104596_pUBC-YFP-mod2	wt	5	331	0.8	TRUE	3:18116603	forward	3	18116603	LB	LZ156_13	9	TTGGCGTAA	0		-12	Col-0	104596	pUBC-YFP-mod2	FALSE
col_4_teb_1_LB_4_104596_pUBC-YFP-mod2	wt	5	199	1	TRUE	3:2252425	reverse	3	2252425	LB	LZ156_13	8	TAACAGCA	0		-25	Col-0	104596	pUBC-YFP-mod2	FALSE
col_4_teb_1_LB_4_104596_pUBC-YFP-mod2	wt	3	215	1	TRUE	3:20217938	reverse	3	20217938	LB	LZ156_13	0		0		0	Col-0	104596	pUBC-YFP-mod2	FALSE
col_4_teb_1_LB_4_104596_pUBC-YFP-mod2	wt	7	235	0.857143	TRUE	3:6933957	forward	3	6933957	LB	LZ156_13	0		3	ACA	-10	Col-0	104596	pUBC-YFP-mod2	FALSE
col_4_teb_1_LB_4_104596_pUBC-YFP-mod2	wt	3	136	1	TRUE	3:11123897	reverse	3	11123897	LB	LZ156_13	24	ACCAGGTGCTTTCAGAATAGTCTT	0		-30	Col-0	104596	pUBC-YFP-mod2	FALSE
col_4_teb_1_LB_4_104596_pUBC-YFP-mod2	wt	3	255	1	TRUE	3:8376374	forward	3	8376374	LB	LZ156_13	0		4	AGGT	-20	Col-0	104596	pUBC-YFP-mod2	FALSE
col_4_teb_1_LB_4_104596_pUBC-YFP-mod2	wt	7	223	1	TRUE	3:416178	reverse	3	416178	LB	LZ156_13	0		3	ATA	-5	Col-0	104596	pUBC-YFP-mod2	FALSE
col_4_teb_1_LB_4_104596_pUBC-YFP-mod2	wt	3	171	1	TRUE	3:4364247	forward	3	4364247	LB	LZ156_13	0		2	TC	-3	Col-0	104596	pUBC-YFP-mod2	FALSE
col_4_teb_1_LB_4_104596_pUBC-YFP-mod2	wt	5	280	0.8	TRUE	3:550290	reverse	3	550290	LB	LZ156_13	0		2	CC	-2	Col-0	104596	pUBC-YFP-mod2	FALSE
col_4_teb_1_LB_4_104596_pUBC-YFP-mod2	wt	4	465	1	TRUE	3:18679958	reverse	3	18679958	LB	LZ156_13	0		1	T	-20	Col-0	104596	pUBC-YFP-mod2	FALSE
col_4_teb_1_LB_4_104596_pUBC-YFP-mod2	wt	5	258	1	TRUE	3:6426824	forward	3	6426824	LB	LZ156_13	4	CACC	0		-7	Col-0	104596	pUBC-YFP-mod2	FALSE
col_4_teb_1_LB_4_104596_pUBC-YFP-mod2	wt	6	233	1	TRUE	3:19099430	forward	3	19099430	LB	LZ156_13	13	TCCTTCCGGAGAA	0		-16	Col-0	104596	pUBC-YFP-mod2	FALSE
col_4_teb_1_LB_4_104596_pUBC-YFP-mod2	wt	4	297	0.75	TRUE	3:21150729	reverse	3	21150729	LB	LZ156_13	1	G	0		0	Col-0	104596	pUBC-YFP-mod2	FALSE
col_4_teb_1_LB_4_104596_pUBC-YFP-mod2	wt	4	122	0.75	TRUE	3:3564072	reverse	3	3564072	LB	LZ156_13	37	CATGATGATTACGAACCGCGGCTCACAAGTCATGTCT	0		-23	Col-0	104596	pUBC-YFP-mod2	FALSE
col_4_teb_1_LB_4_104596_pUBC-YFP-mod2	wt	5	220	0.8	TRUE	3:18841015	reverse	3	18841015	LB	LZ156_13	0		4	ACCA	-12	Col-0	104596	pUBC-YFP-mod2	FALSE
col_4_teb_1_LB_4_104596_pUBC-YFP-mod2	wt	3	340	1	TRUE	3:20209982	forward	3	20209982	LB	LZ156_13	0		6	CCACAA	-9	Col-0	104596	pUBC-YFP-mod2	FALSE
col_4_teb_1_LB_4_104596_pUBC-YFP-mod2	wt	9	293	1	TRUE	3:416168	forward	3	416168	LB	LZ156_13	0		3	ATA	-7	Col-0	104596	pUBC-YFP-mod2	FALSE
col_4_teb_1_LB_4_104596_pUBC-YFP-mod2	wt	4	315	1	TRUE	3:20934768	forward	3	20934768	LB	LZ156_13	0		2	TC	-3	Col-0	104596	pUBC-YFP-mod2	FALSE
col_4_teb_1_LB_4_104596_pUBC-YFP-mod2	wt	20	570	1	TRUE	3:11905912	reverse	3	11905912	LB	LZ156_13	0		0		-11	Col-0	104596	pUBC-YFP-mod2	FALSE
col_4_teb_1_LB_4_104596_pUBC-YFP-mod2	wt	5	180	1	TRUE	3:5748572	reverse	3	5748572	LB	LZ156_13	0		4	ACAA	-9	Col-0	104596	pUBC-YFP-mod2	FALSE
col_4_teb_1_LB_4_104596_pUBC-YFP-mod2	wt	16	431	0.875	TRUE	3:5598719	reverse	3	5598719	LB	LZ156_13	0		3	AAT	-8	Col-0	104596	pUBC-YFP-mod2	FALSE
col_4_teb_1_LB_4_104596_pUBC-YFP-mod2	wt	5	204	1	TRUE	3:4324853	reverse	3	4324853	LB	LZ156_13	4	TCGG	0		-8	Col-0	104596	pUBC-YFP-mod2	FALSE
col_4_teb_1_LB_4_104596_pUBC-YFP-mod2	wt	5	322	1	TRUE	3:4541024	forward	3	4541024	LB	LZ156_13	0		2	TG	0	Col-0	104596	pUBC-YFP-mod2	FALSE
col_4_teb_1_LB_4_104596_pUBC-YFP-mod2	wt	5	190	1	TRUE	3:2712660	reverse	3	2712660	LB	LZ156_13	0		1	G	0	Col-0	104596	pUBC-YFP-mod2	FALSE
col_4_teb_1_LB_4_104596_pUBC-YFP-mod2	wt	3	273	1	TRUE	3:5081545	reverse	3	5081545	LB	LZ156_13	0		4	AATA	-7	Col-0	104596	pUBC-YFP-mod2	FALSE
col_4_teb_1_LB_4_104596_pUBC-YFP-mod2	wt	3	129	1	TRUE	3:7890030	forward	3	7890030	LB	LZ156_13	0		0		-3	Col-0	104596	pUBC-YFP-mod2	FALSE
col_4_teb_1_LB_4_104596_pUBC-YFP-mod2	wt	7	270	0.857143	TRUE	3:968643	reverse	3	968643	LB	LZ156_13	17	ACTGTAGGTATCAGGTG	0		-17	Col-0	104596	pUBC-YFP-mod2	FALSE
col_4_teb_1_LB_4_104596_pUBC-YFP-mod2	wt	6	174	1	TRUE	3:22579018	forward	3	22579018	LB	LZ156_13	0		2	CA	-12	Col-0	104596	pUBC-YFP-mod2	FALSE
col_4_teb_1_LB_4_104596_pUBC-YFP-mod2	wt	3	132	1	TRUE	3:20663460	forward	3	20663460	LB	LZ156_13	0		2	AT	-6	Col-0	104596	pUBC-YFP-mod2	FALSE
col_4_teb_1_LB_4_104596_pUBC-YFP-mod2	wt	5	421	1	TRUE	3:9531109	forward	3	9531109	LB	LZ156_13	0		2	AT	-4	Col-0	104596	pUBC-YFP-mod2	FALSE
col_4_teb_1_LB_4_104596_pUBC-YFP-mod2	wt	4	409	1	TRUE	3:3560510	reverse	3	3560510	LB	LZ156_13	5	GTCCG	0		-6	Col-0	104596	pUBC-YFP-mod2	FALSE
col_4_teb_1_LB_4_104596_pUBC-YFP-mod2	wt	4	237	1	TRUE	3:1528083	reverse	3	1528083	LB	LZ156_13	0		2	TA	-7	Col-0	104596	pUBC-YFP-mod2	FALSE
col_4_teb_1_LB_4_104596_pUBC-YFP-mod2	wt	6	195	0.833333	TRUE	3:292537	reverse	3	292537	LB	LZ156_13	0		2	TG	0	Col-0	104596	pUBC-YFP-mod2	FALSE
col_4_teb_1_LB_4_104596_pUBC-YFP-mod2	wt	3	206	1	TRUE	3:21824462	reverse	3	21824462	LB	LZ156_13	0		5	CCTGC	1	Col-0	104596	pUBC-YFP-mod2	FALSE
col_4_teb_1_LB_4_104596_pUBC-YFP-mod2	wt	3	183	1	TRUE	3:20149138	forward	3	20149138	LB	LZ156_13	6	TCTGTG	0		-4	Col-0	104596	pUBC-YFP-mod2	FALSE
col_4_teb_1_LB_4_104596_pUBC-YFP-mod2	wt	3	243	1	TRUE	3:8822915	forward	3	8822915	LB	LZ156_13	2	GT	0		-6	Col-0	104596	pUBC-YFP-mod2	FALSE
col_4_teb_1_LB_4_104596_pUBC-YFP-mod2	wt	3	225	1	TRUE	3:1010620	forward	3	1010620	LB	LZ156_13	0		4	ACAA	-9	Col-0	104596	pUBC-YFP-mod2	FALSE
col_4_teb_1_LB_4_104596_pUBC-YFP-mod2	wt	5	244	1	TRUE	3:23321584	reverse	3	23321584	LB	LZ156_13	21	ATTTCGTATATGAATCAAGGT	0		-30	Col-0	104596	pUBC-YFP-mod2	FALSE
col_4_teb_1_LB_4_104596_pUBC-YFP-mod2	wt	3	171	1	TRUE	3:4475219	reverse	3	4475219	LB	LZ156_13	0		5	GTTTA	-17	Col-0	104596	pUBC-YFP-mod2	FALSE
col_4_teb_1_LB_4_104596_pUBC-YFP-mod2	wt	3	274	1	TRUE	3:3643476	reverse	3	3643476	LB	LZ156_13	11	GGACTTTCAGG	0		-5	Col-0	104596	pUBC-YFP-mod2	FALSE
col_4_teb_1_LB_4_104596_pUBC-YFP-mod2	wt	7	296	0.857143	TRUE	3:18492434	reverse	3	18492434	LB	LZ156_13	0		3	TTA	-17	Col-0	104596	pUBC-YFP-mod2	FALSE
col_4_teb_1_LB_4_104596_pUBC-YFP-mod2	wt	3	162	1	TRUE	3:7712690	reverse	3	7712690	LB	LZ156_13	29	GTCTCCCTTCCCTTTCGGCGTTACGCTCT	0		-29	Col-0	104596	pUBC-YFP-mod2	FALSE
col_4_teb_1_LB_4_104596_pUBC-YFP-mod2	wt	4	206	1	TRUE	3:4777526	reverse	3	4777526	LB	LZ156_13	15	CACAGTTTATCTATT	0		-6	Col-0	104596	pUBC-YFP-mod2	FALSE
col_4_teb_1_LB_4_104596_pUBC-YFP-mod2	wt	6	134	1	TRUE	3:3096290	forward	3	3096290	LB	LZ156_13	0		0		-5	Col-0	104596	pUBC-YFP-mod2	FALSE
col_4_teb_1_LB_4_104596_pUBC-YFP-mod2	wt	3	275	1	TRUE	3:2152796	reverse	3	2152796	LB	LZ156_13	0		1	T	-19	Col-0	104596	pUBC-YFP-mod2	FALSE
col_4_teb_1_LB_4_104596_pUBC-YFP-mod2	wt	3	145	1	TRUE	3:2832962	reverse	3	2832962	LB	LZ156_13	1	T	0		0	Col-0	104596	pUBC-YFP-mod2	FALSE
col_4_teb_1_LB_4_104596_pUBC-YFP-mod2	wt	5	157	1	TRUE	3:6381233	reverse	3	6381233	LB	LZ156_13	3	GTG	0		0	Col-0	104596	pUBC-YFP-mod2	FALSE
col_4_teb_1_LB_4_104596_pUBC-YFP-mod2	wt	3	184	1	TRUE	3:4324826	forward	3	4324826	LB	LZ156_13	16	ACACGTAGCCTTCGGG	0		-15	Col-0	104596	pUBC-YFP-mod2	FALSE
col_4_teb_1_LB_4_104596_pUBC-YFP-mod2	wt	4	225	0.75	TRUE	3:22606328	forward	3	22606328	LB	LZ156_13	38	ACAAATAATAAAAGCAGACTTGACCTGATAGTTTGGCT	0		-33	Col-0	104596	pUBC-YFP-mod2	FALSE
col_4_teb_1_LB_4_104596_pUBC-YFP-mod2	wt	6	305	1	TRUE	3:1864233	reverse	3	1864233	LB	LZ156_13	0		5	ACAAT	-8	Col-0	104596	pUBC-YFP-mod2	FALSE
col_4_teb_1_LB_4_104596_pUBC-YFP-mod2	wt	5	222	1	TRUE	3:21269018	reverse	3	21269018	LB	LZ156_13	5	AGAAA	0		-20	Col-0	104596	pUBC-YFP-mod2	FALSE
col_4_teb_1_LB_4_104596_pUBC-YFP-mod2	wt	5	231	1	TRUE	3:9685224	reverse	3	9685224	LB	LZ156_13	0		0		-3	Col-0	104596	pUBC-YFP-mod2	FALSE
col_4_teb_1_LB_4_104596_pUBC-YFP-mod2	wt	3	242	1	TRUE	3:23328853	forward	3	23328853	LB	LZ156_13	8	TCTTTCAG	0		0	Col-0	104596	pUBC-YFP-mod2	FALSE
col_4_teb_1_LB_4_104596_pUBC-YFP-mod2	wt	7	349	0.857143	TRUE	4:242315	reverse	4	242315	LB	LZ156_13	0		4	TTTA	-17	Col-0	104596	pUBC-YFP-mod2	FALSE
col_4_teb_1_LB_4_104596_pUBC-YFP-mod2	wt	6	242	1	TRUE	4:954095	forward	4	954095	LB	LZ156_13	0		1	T	-30	Col-0	104596	pUBC-YFP-mod2	FALSE
col_4_teb_1_LB_4_104596_pUBC-YFP-mod2	wt	4	185	0.8	TRUE	4:2682718	reverse	4	2682718	LB	LZ156_13	0		2	TG	-32	Col-0	104596	pUBC-YFP-mod2	FALSE
col_4_teb_1_LB_4_104596_pUBC-YFP-mod2	wt	11	284	0.857143	TRUE	4:2696163	forward	4	2696163	LB	LZ156_13	0		0		-35	Col-0	104596	pUBC-YFP-mod2	FALSE
col_4_teb_1_LB_4_104596_pUBC-YFP-mod2	wt	5	262	1	TRUE	4:7773799	forward	4	7773799	LB	LZ156_13	0		2	CC	-37	Col-0	104596	pUBC-YFP-mod2	FALSE
col_4_teb_1_LB_4_104596_pUBC-YFP-mod2	wt	4	315	1	TRUE	4:7903935	forward	4	7903935	LB	LZ156_13	0		1	C	-31	Col-0	104596	pUBC-YFP-mod2	FALSE
col_4_teb_1_LB_4_104596_pUBC-YFP-mod2	wt	69	443	0.956522	TRUE	4:8374432	reverse	4	8374432	LB	LZ156_13	0		7	TCTACAC	-14	Col-0	104596	pUBC-YFP-mod2	FALSE
col_4_teb_1_LB_4_104596_pUBC-YFP-mod2	wt	23	233	0.956522	TRUE	4:8916511	forward	4	8916511	LB	LZ156_13	0		3	TGC	-31	Col-0	104596	pUBC-YFP-mod2	FALSE
col_4_teb_1_LB_4_104596_pUBC-YFP-mod2	wt	6	195	1	TRUE	4:9252390	reverse	4	9252390	LB	LZ156_13	3	CCT	0		-33	Col-0	104596	pUBC-YFP-mod2	FALSE
col_4_teb_1_LB_4_104596_pUBC-YFP-mod2	wt	26	342	0.961538	TRUE	4:11661786	forward	4	11661786	LB	LZ156_13	10	GATATGACCT	0		-34	Col-0	104596	pUBC-YFP-mod2	FALSE
col_4_teb_1_LB_4_104596_pUBC-YFP-mod2	wt	3	218	1	TRUE	4:12351561	reverse	4	12351561	LB	LZ156_13	0		3	CCA	-36	Col-0	104596	pUBC-YFP-mod2	FALSE
col_4_teb_1_LB_4_104596_pUBC-YFP-mod2	wt	6	470	1	TRUE	4:13244268	forward	4	13244268	LB	LZ156_13	13	GCGCGCAGTCCTG	0		-41	Col-0	104596	pUBC-YFP-mod2	FALSE
col_4_teb_1_LB_4_104596_pUBC-YFP-mod2	wt	4	545	1	TRUE	4:13523320	forward	4	13523320	LB	LZ156_13	0		4	GTGC	-31	Col-0	104596	pUBC-YFP-mod2	FALSE
col_4_teb_1_LB_4_104596_pUBC-YFP-mod2	wt	10	262	1	TRUE	4:13684503	reverse	4	13684503	LB	LZ156_13	0		3	GCT	-30	Col-0	104596	pUBC-YFP-mod2	FALSE
col_4_teb_1_LB_4_104596_pUBC-YFP-mod2	wt	4	149	0.75	TRUE	4:13807354	reverse	4	13807354	LB	LZ156_13	0		3	GCC	-62	Col-0	104596	pUBC-YFP-mod2	FALSE
col_4_teb_1_LB_4_104596_pUBC-YFP-mod2	wt	6	138	1	TRUE	4:14568363	reverse	4	14568363	LB	LZ156_13	0		4	TTCA	-40	Col-0	104596	pUBC-YFP-mod2	FALSE
col_4_teb_1_LB_4_104596_pUBC-YFP-mod2	wt	4	420	1	TRUE	4:14820283	reverse	4	14820283	LB	LZ156_13	0		1	A	-40	Col-0	104596	pUBC-YFP-mod2	FALSE
col_4_teb_1_LB_4_104596_pUBC-YFP-mod2	wt	4	232	0.75	TRUE	4:14872163	reverse	4	14872163	LB	LZ156_13	0		3	CAG	-25	Col-0	104596	pUBC-YFP-mod2	FALSE
col_4_teb_1_LB_4_104596_pUBC-YFP-mod2	wt	3	120	1	TRUE	4:15017949	forward	4	15017949	LB	LZ156_13	9	AAACGCAGT	0		-43	Col-0	104596	pUBC-YFP-mod2	FALSE
col_4_teb_1_LB_4_104596_pUBC-YFP-mod2	wt	3	142	1	TRUE	4:15161552	forward	4	15161552	LB	LZ156_13	0		3	TCA	-68	Col-0	104596	pUBC-YFP-mod2	FALSE
col_4_teb_1_LB_4_104596_pUBC-YFP-mod2	wt	9	400	1	TRUE	4:15505129	reverse	4	15505129	LB	LZ156_13	0		3	CCT	-61	Col-0	104596	pUBC-YFP-mod2	FALSE
col_4_teb_1_LB_4_104596_pUBC-YFP-mod2	wt	6	224	1	TRUE	4:16658061	forward	4	16658061	LB	LZ156_13	27	GATAAATTGTGGTGTAAACCTCCTGAA	0		-67	Col-0	104596	pUBC-YFP-mod2	FALSE
col_4_teb_1_LB_4_104596_pUBC-YFP-mod2	wt	18	439	0.833333	TRUE	4:17486289	forward	4	17486289	LB	LZ156_13	0		6	CTTTCA	-26	Col-0	104596	pUBC-YFP-mod2	FALSE
col_4_teb_1_LB_4_104596_pUBC-YFP-mod2	wt	6	329	1	TRUE	4:17907286	reverse	4	17907286	LB	LZ156_13	2	AC	0		-50	Col-0	104596	pUBC-YFP-mod2	FALSE
col_4_teb_1_LB_4_104596_pUBC-YFP-mod2	wt	4	227	1	TRUE	4:18572229	forward	4	18572229	LB	LZ156_13	4	ACTG	0		-36	Col-0	104596	pUBC-YFP-mod2	FALSE
col_4_teb_1_LB_4_104596_pUBC-YFP-mod2	wt	8	377	1	TRUE	4:1464595	reverse	4	1464595	LB	LZ156_13	0		3	AAT	-8	Col-0	104596	pUBC-YFP-mod2	FALSE
col_4_teb_1_LB_4_104596_pUBC-YFP-mod2	wt	4	209	1	TRUE	4:604024	reverse	4	604024	LB	LZ156_13	0		3	AAT	-8	Col-0	104596	pUBC-YFP-mod2	FALSE
col_4_teb_1_LB_4_104596_pUBC-YFP-mod2	wt	7	259	1	TRUE	4:13509810	reverse	4	13509810	LB	LZ156_13	0		3	TAC	-16	Col-0	104596	pUBC-YFP-mod2	FALSE
col_4_teb_1_LB_4_104596_pUBC-YFP-mod2	wt	7	255	0.857143	TRUE	4:13319201	forward	4	13319201	LB	LZ156_13	0		1	T	-8	Col-0	104596	pUBC-YFP-mod2	FALSE
col_4_teb_1_LB_4_104596_pUBC-YFP-mod2	wt	6	209	1	TRUE	4:8538356	reverse	4	8538356	LB	LZ156_13	0		1	A	-15	Col-0	104596	pUBC-YFP-mod2	FALSE
col_4_teb_1_LB_4_104596_pUBC-YFP-mod2	wt	6	275	1	TRUE	4:13411039	forward	4	13411039	LB	LZ156_13	0		0		-21	Col-0	104596	pUBC-YFP-mod2	FALSE
col_4_teb_1_LB_4_104596_pUBC-YFP-mod2	wt	12	273	0.916667	TRUE	4:92407	forward	4	92407	LB	LZ156_13	0		2	AA	-9	Col-0	104596	pUBC-YFP-mod2	FALSE
col_4_teb_1_LB_4_104596_pUBC-YFP-mod2	wt	22	442	1	TRUE	4:8916559	reverse	4	8916559	LB	LZ156_13	0		3	CAA	-9	Col-0	104596	pUBC-YFP-mod2	FALSE
col_4_teb_1_LB_4_104596_pUBC-YFP-mod2	wt	18	378	0.833333	TRUE	4:15638563	reverse	4	15638563	LB	LZ156_13	19	TTCTCGTGACCTTGACTCA	0		-8	Col-0	104596	pUBC-YFP-mod2	FALSE
col_4_teb_1_LB_4_104596_pUBC-YFP-mod2	wt	3	192	1	TRUE	4:17953013	reverse	4	17953013	LB	LZ156_13	0		3	TTA	-17	Col-0	104596	pUBC-YFP-mod2	FALSE
col_4_teb_1_LB_4_104596_pUBC-YFP-mod2	wt	3	110	1	TRUE	4:15612299	forward	4	15612299	LB	LZ156_13	0		7	GCCACAA	-9	Col-0	104596	pUBC-YFP-mod2	FALSE
col_4_teb_1_LB_4_104596_pUBC-YFP-mod2	wt	3	109	1	TRUE	4:611634	reverse	4	611634	LB	LZ156_13	21	AGATGTCCAAACTCAAATATT	0		0	Col-0	104596	pUBC-YFP-mod2	FALSE
col_4_teb_1_LB_4_104596_pUBC-YFP-mod2	wt	3	203	1	TRUE	4:1423329	reverse	4	1423329	LB	LZ156_13	0		5	CCTGC	1	Col-0	104596	pUBC-YFP-mod2	FALSE
col_4_teb_1_LB_4_104596_pUBC-YFP-mod2	wt	5	254	0.8	TRUE	4:15017968	reverse	4	15017968	LB	LZ156_13	9	CATGCGTTA	0		-11	Col-0	104596	pUBC-YFP-mod2	FALSE
col_4_teb_1_LB_4_104596_pUBC-YFP-mod2	wt	10	242	0.9	TRUE	4:18285495	forward	4	18285495	LB	LZ156_13	12	ACTGACCTTGAC	0		-23	Col-0	104596	pUBC-YFP-mod2	FALSE
col_4_teb_1_LB_4_104596_pUBC-YFP-mod2	wt	5	253	1	TRUE	4:13397819	forward	4	13397819	LB	LZ156_13	0		0		-3	Col-0	104596	pUBC-YFP-mod2	FALSE
col_4_teb_1_LB_4_104596_pUBC-YFP-mod2	wt	5	523	1	TRUE	4:1127522	forward	4	1127522	LB	LZ156_13	0		2	TC	-3	Col-0	104596	pUBC-YFP-mod2	FALSE
col_4_teb_1_LB_4_104596_pUBC-YFP-mod2	wt	3	320	1	TRUE	4:2663282	forward	4	2663282	LB	LZ156_13	0		2	CA	-12	Col-0	104596	pUBC-YFP-mod2	FALSE
col_4_teb_1_LB_4_104596_pUBC-YFP-mod2	wt	4	264	0.75	TRUE	4:12113710	forward	4	12113710	LB	LZ156_13	0		2	CA	-10	Col-0	104596	pUBC-YFP-mod2	FALSE
col_4_teb_1_LB_4_104596_pUBC-YFP-mod2	wt	4	164	1	TRUE	4:8367972	forward	4	8367972	LB	LZ156_13	1	T	0		-4	Col-0	104596	pUBC-YFP-mod2	FALSE
col_4_teb_1_LB_4_104596_pUBC-YFP-mod2	wt	6	365	1	TRUE	4:17126923	forward	4	17126923	LB	LZ156_13	11	GTCCAAACATA	0		-20	Col-0	104596	pUBC-YFP-mod2	FALSE
col_4_teb_1_LB_4_104596_pUBC-YFP-mod2	wt	7	249	1	TRUE	4:12387288	reverse	4	12387288	LB	LZ156_13	3	TTG	0		-3	Col-0	104596	pUBC-YFP-mod2	FALSE
col_4_teb_1_LB_4_104596_pUBC-YFP-mod2	wt	4	295	1	TRUE	4:7424242	reverse	4	7424242	LB	LZ156_13	0		6	ACAATA	-7	Col-0	104596	pUBC-YFP-mod2	FALSE
col_4_teb_1_LB_4_104596_pUBC-YFP-mod2	wt	3	308	1	TRUE	4:17002690	reverse	4	17002690	LB	LZ156_13	0		4	ACAC	-14	Col-0	104596	pUBC-YFP-mod2	FALSE
col_4_teb_1_LB_4_104596_pUBC-YFP-mod2	wt	6	291	1	TRUE	4:12351533	forward	4	12351533	LB	LZ156_13	1	C	0		-10	Col-0	104596	pUBC-YFP-mod2	FALSE
col_4_teb_1_LB_4_104596_pUBC-YFP-mod2	wt	3	145	1	TRUE	4:13319191	forward	4	13319191	LB	LZ156_13	1	A	0		0	Col-0	104596	pUBC-YFP-mod2	FALSE
col_4_teb_1_LB_4_104596_pUBC-YFP-mod2	wt	5	171	0.8	TRUE	4:2289147	forward	4	2289147	LB	LZ156_13	27	GAGACTTTTATATAACGATGGAAAAGA	0		-10	Col-0	104596	pUBC-YFP-mod2	FALSE
col_4_teb_1_LB_4_104596_pUBC-YFP-mod2	wt	7	345	1	TRUE	4:2417272	forward	4	2417272	LB	LZ156_13	0		5	CAATA	-7	Col-0	104596	pUBC-YFP-mod2	FALSE
col_4_teb_1_LB_4_104596_pUBC-YFP-mod2	wt	8	263	0.875	TRUE	4:2760393	reverse	4	2760393	LB	LZ156_13	0		2	CT	-1	Col-0	104596	pUBC-YFP-mod2	FALSE
col_4_teb_1_LB_4_104596_pUBC-YFP-mod2	wt	7	275	1	TRUE	4:15334842	forward	4	15334842	LB	LZ156_13	0		1	A	-12	Col-0	104596	pUBC-YFP-mod2	FALSE
col_4_teb_1_LB_4_104596_pUBC-YFP-mod2	wt	5	130	0.8	TRUE	4:13509771	forward	4	13509771	LB	LZ156_13	29	TCCTGAAATAATTACGTCGGATAATTTAT	0		-17	Col-0	104596	pUBC-YFP-mod2	FALSE
col_4_teb_1_LB_4_104596_pUBC-YFP-mod2	wt	3	196	1	TRUE	4:18020539	reverse	4	18020539	LB	LZ156_13	0		1	T	-18	Col-0	104596	pUBC-YFP-mod2	FALSE
col_4_teb_1_LB_4_104596_pUBC-YFP-mod2	wt	5	281	0.8	TRUE	4:462066	forward	4	462066	LB	LZ156_13	3	TGC	0		-4	Col-0	104596	pUBC-YFP-mod2	FALSE
col_4_teb_1_LB_4_104596_pUBC-YFP-mod2	wt	6	212	1	TRUE	4:9650572	reverse	4	9650572	LB	LZ156_13	0		1	A	-7	Col-0	104596	pUBC-YFP-mod2	FALSE
col_4_teb_1_LB_4_104596_pUBC-YFP-mod2	wt	3	155	1	TRUE	4:13087522	reverse	4	13087522	LB	LZ156_13	2	TT	0		-15	Col-0	104596	pUBC-YFP-mod2	FALSE
col_4_teb_1_LB_4_104596_pUBC-YFP-mod2	wt	4	142	1	TRUE	4:13304790	forward	4	13304790	LB	LZ156_13	11	GTGTAAACCCA	0		0	Col-0	104596	pUBC-YFP-mod2	FALSE
col_4_teb_1_LB_4_104596_pUBC-YFP-mod2	wt	3	316	1	TRUE	4:9920557	forward	4	9920557	LB	LZ156_13	0		1	A	-17	Col-0	104596	pUBC-YFP-mod2	FALSE
col_4_teb_1_LB_4_104596_pUBC-YFP-mod2	wt	3	126	1	TRUE	4:13160752	reverse	4	13160752	LB	LZ156_13	0		0		-1	Col-0	104596	pUBC-YFP-mod2	FALSE
col_4_teb_1_LB_4_104596_pUBC-YFP-mod2	wt	3	129	1	TRUE	4:8054218	forward	4	8054218	LB	LZ156_13	0		4	ATAT	-6	Col-0	104596	pUBC-YFP-mod2	FALSE
col_4_teb_1_LB_4_104596_pUBC-YFP-mod2	wt	3	256	1	TRUE	4:14650895	forward	4	14650895	LB	LZ156_13	0		7	GCAATAT	-6	Col-0	104596	pUBC-YFP-mod2	FALSE
col_4_teb_1_LB_4_104596_pUBC-YFP-mod2	wt	4	186	1	TRUE	4:13369979	reverse	4	13369979	LB	LZ156_13	0		0		-11	Col-0	104596	pUBC-YFP-mod2	FALSE
col_4_teb_1_LB_4_104596_pUBC-YFP-mod2	wt	3	234	1	TRUE	4:14432312	reverse	4	14432312	LB	LZ156_13	0		2	GG	-21	Col-0	104596	pUBC-YFP-mod2	FALSE
col_4_teb_1_LB_4_104596_pUBC-YFP-mod2	wt	3	122	1	TRUE	4:7222131	forward	4	7222131	LB	LZ156_13	0		2	TT	-19	Col-0	104596	pUBC-YFP-mod2	FALSE
col_4_teb_1_LB_4_104596_pUBC-YFP-mod2	wt	4	171	0.75	TRUE	5:36766	forward	5	36766	LB	LZ156_13	5	ATTCA	0		-32	Col-0	104596	pUBC-YFP-mod2	FALSE
col_4_teb_1_LB_4_104596_pUBC-YFP-mod2	wt	24	444	0.958333	TRUE	5:420194	forward	5	420194	LB	LZ156_13	7	TATGATT	0		-28	Col-0	104596	pUBC-YFP-mod2	FALSE
col_4_teb_1_LB_4_104596_pUBC-YFP-mod2	wt	3	205	1	TRUE	5:499537	forward	5	499537	LB	LZ156_13	0		3	CCT	-47	Col-0	104596	pUBC-YFP-mod2	FALSE
col_4_teb_1_LB_4_104596_pUBC-YFP-mod2	wt	6	295	1	TRUE	5:533770	forward	5	533770	LB	LZ156_13	0		2	GC	-31	Col-0	104596	pUBC-YFP-mod2	FALSE
col_4_teb_1_LB_4_104596_pUBC-YFP-mod2	wt	4	224	1	TRUE	5:1637057	forward	5	1637057	LB	LZ156_13	0		2	AG	-67	Col-0	104596	pUBC-YFP-mod2	FALSE
col_4_teb_1_LB_4_104596_pUBC-YFP-mod2	wt	4	308	1	TRUE	5:2354397	forward	5	2354397	LB	LZ156_13	0		1	A	-26	Col-0	104596	pUBC-YFP-mod2	FALSE
col_4_teb_1_LB_4_104596_pUBC-YFP-mod2	wt	11	397	0.818182	TRUE	5:2636641	forward	5	2636641	LB	LZ156_13	0		3	TTC	-27	Col-0	104596	pUBC-YFP-mod2	FALSE
col_4_teb_1_LB_4_104596_pUBC-YFP-mod2	wt	7	367	1	TRUE	5:2694221	forward	5	2694221	LB	LZ156_13	0		3	TCA	-26	Col-0	104596	pUBC-YFP-mod2	FALSE
col_4_teb_1_LB_4_104596_pUBC-YFP-mod2	wt	3	312	1	TRUE	5:2928177	reverse	5	2928177	LB	LZ156_13	0		2	AG	-22	Col-0	104596	pUBC-YFP-mod2	FALSE
col_4_teb_1_LB_4_104596_pUBC-YFP-mod2	wt	3	217	1	TRUE	5:3046960	forward	5	3046960	LB	LZ156_13	6	ACTGTC	0		-33	Col-0	104596	pUBC-YFP-mod2	FALSE
col_4_teb_1_LB_4_104596_pUBC-YFP-mod2	wt	6	242	0.833333	TRUE	5:3286509	forward	5	3286509	LB	LZ156_13	16	CCGGTGAACAGCTCCT	0		-13	Col-0	104596	pUBC-YFP-mod2	FALSE
col_4_teb_1_LB_4_104596_pUBC-YFP-mod2	wt	11	400	1	TRUE	5:3499483	forward	5	3499483	LB	LZ156_13	0		7	GCTTTCA	-26	Col-0	104596	pUBC-YFP-mod2	FALSE
col_4_teb_1_LB_4_104596_pUBC-YFP-mod2	wt	39	283	0.923077	TRUE	5:3692796	forward	5	3692796	LB	LZ156_13	13	GTGGGCCATATAC	0		-41	Col-0	104596	pUBC-YFP-mod2	FALSE
col_4_teb_1_LB_4_104596_pUBC-YFP-mod2	wt	9	262	0.888889	TRUE	5:3956152	forward	5	3956152	LB	LZ156_13	0		3	CAG	-35	Col-0	104596	pUBC-YFP-mod2	FALSE
col_4_teb_1_LB_4_104596_pUBC-YFP-mod2	wt	7	320	1	TRUE	5:4099694	forward	5	4099694	LB	LZ156_13	0		2	TG	-32	Col-0	104596	pUBC-YFP-mod2	FALSE
col_4_teb_1_LB_4_104596_pUBC-YFP-mod2	wt	3	305	1	TRUE	5:4333084	reverse	5	4333084	LB	LZ156_13	0		4	CATC	-38	Col-0	104596	pUBC-YFP-mod2	FALSE
col_4_teb_1_LB_4_104596_pUBC-YFP-mod2	wt	3	230	1	TRUE	5:4558069	forward	5	4558069	LB	LZ156_13	4	GAGT	0		-37	Col-0	104596	pUBC-YFP-mod2	FALSE
col_4_teb_1_LB_4_104596_pUBC-YFP-mod2	wt	8	246	1	TRUE	5:5572400	forward	5	5572400	LB	LZ156_13	17	TCACATATTAGGGCATC	0		-65	Col-0	104596	pUBC-YFP-mod2	FALSE
col_4_teb_1_LB_4_104596_pUBC-YFP-mod2	wt	3	304	1	TRUE	5:5601756	forward	5	5601756	LB	LZ156_13	0		4	GCTT	-29	Col-0	104596	pUBC-YFP-mod2	FALSE
col_4_teb_1_LB_4_104596_pUBC-YFP-mod2	wt	6	260	1	TRUE	5:5620936	forward	5	5620936	LB	LZ156_13	0		4	GCCT	-61	Col-0	104596	pUBC-YFP-mod2	FALSE
col_4_teb_1_LB_4_104596_pUBC-YFP-mod2	wt	3	150	1	TRUE	5:6225621	forward	5	6225621	LB	LZ156_13	0		2	CA	-40	Col-0	104596	pUBC-YFP-mod2	FALSE
col_4_teb_1_LB_4_104596_pUBC-YFP-mod2	wt	5	140	0.8	TRUE	5:6865351	reverse	5	6865351	LB	LZ156_13	0		4	TCAG	-25	Col-0	104596	pUBC-YFP-mod2	FALSE
col_4_teb_1_LB_4_104596_pUBC-YFP-mod2	wt	5	262	1	TRUE	5:7579292	forward	5	7579292	LB	LZ156_13	0		1	C	-53	Col-0	104596	pUBC-YFP-mod2	FALSE
col_4_teb_1_LB_4_104596_pUBC-YFP-mod2	wt	3	139	1	TRUE	5:7811295	forward	5	7811295	LB	LZ156_13	3	AAT	0		-68	Col-0	104596	pUBC-YFP-mod2	FALSE
col_4_teb_1_LB_4_104596_pUBC-YFP-mod2	wt	3	310	1	TRUE	5:15451252	reverse	5	15451252	LB	LZ156_13	2	TT	0		-33	Col-0	104596	pUBC-YFP-mod2	FALSE
col_4_teb_1_LB_4_104596_pUBC-YFP-mod2	wt	3	458	1	TRUE	5:15763462	reverse	5	15763462	LB	LZ156_13	0		3	TCA	-68	Col-0	104596	pUBC-YFP-mod2	FALSE
col_4_teb_1_LB_4_104596_pUBC-YFP-mod2	wt	4	296	1	TRUE	5:16086381	forward	5	16086381	LB	LZ156_13	0		3	TCA	-26	Col-0	104596	pUBC-YFP-mod2	FALSE
col_4_teb_1_LB_4_104596_pUBC-YFP-mod2	wt	4	307	0.75	TRUE	5:16450079	reverse	5	16450079	LB	LZ156_13	0		5	TTCAG	-25	Col-0	104596	pUBC-YFP-mod2	FALSE
col_4_teb_1_LB_4_104596_pUBC-YFP-mod2	wt	3	190	1	TRUE	5:16645354	forward	5	16645354	LB	LZ156_13	0		3	GTG	-32	Col-0	104596	pUBC-YFP-mod2	FALSE
col_4_teb_1_LB_4_104596_pUBC-YFP-mod2	wt	6	307	0.833333	TRUE	5:17405089	reverse	5	17405089	LB	LZ156_13	0		2	GC	-31	Col-0	104596	pUBC-YFP-mod2	FALSE
col_4_teb_1_LB_4_104596_pUBC-YFP-mod2	wt	5	372	1	TRUE	5:17423293	reverse	5	17423293	LB	LZ156_13	0		2	CA	-36	Col-0	104596	pUBC-YFP-mod2	FALSE
col_4_teb_1_LB_4_104596_pUBC-YFP-mod2	wt	7	371	0.857143	TRUE	5:17803250	reverse	5	17803250	LB	LZ156_13	2	AT	0		-35	Col-0	104596	pUBC-YFP-mod2	FALSE
col_4_teb_1_LB_4_104596_pUBC-YFP-mod2	wt	4	174	1	TRUE	5:18415988	forward	5	18415988	LB	LZ156_13	0		4	CCTT	-46	Col-0	104596	pUBC-YFP-mod2	FALSE
col_4_teb_1_LB_4_104596_pUBC-YFP-mod2	wt	8	382	1	TRUE	5:18564797	reverse	5	18564797	LB	LZ156_13	0		3	CTT	-29	Col-0	104596	pUBC-YFP-mod2	FALSE
col_4_teb_1_LB_4_104596_pUBC-YFP-mod2	wt	7	274	1	TRUE	5:18580382	reverse	5	18580382	LB	LZ156_13	1	G	0		-37	Col-0	104596	pUBC-YFP-mod2	FALSE
col_4_teb_1_LB_4_104596_pUBC-YFP-mod2	wt	19	324	0.947368	TRUE	5:18791079	forward	5	18791079	LB	LZ156_13	0		6	TTGATT	-42	Col-0	104596	pUBC-YFP-mod2	FALSE
col_4_teb_1_LB_4_104596_pUBC-YFP-mod2	wt	6	135	0.833333	TRUE	5:18897713	forward	5	18897713	LB	LZ156_13	16	GTGATTCATCCAGGTG	0		0	Col-0	104596	pUBC-YFP-mod2	FALSE
col_4_teb_1_LB_4_104596_pUBC-YFP-mod2	wt	4	331	1	TRUE	5:19383336	reverse	5	19383336	LB	LZ156_13	0		2	TT	-29	Col-0	104596	pUBC-YFP-mod2	FALSE
col_4_teb_1_LB_4_104596_pUBC-YFP-mod2	wt	39	331	0.956522	TRUE	5:19395849	reverse	5	19395849	LB	LZ156_13	0		3	CCT	-61	Col-0	104596	pUBC-YFP-mod2	FALSE
col_4_teb_1_LB_4_104596_pUBC-YFP-mod2	wt	30	391	0.933333	TRUE	5:20905597	reverse	5	20905597	LB	LZ156_13	0		3	TTG	-45	Col-0	104596	pUBC-YFP-mod2	FALSE
col_4_teb_1_LB_4_104596_pUBC-YFP-mod2	wt	5	147	1	TRUE	5:21811789	forward	5	21811789	LB	LZ156_13	0		3	GGT	-33	Col-0	104596	pUBC-YFP-mod2	FALSE
col_4_teb_1_LB_4_104596_pUBC-YFP-mod2	wt	33	468	0.757576	TRUE	5:21823041	forward	5	21823041	LB	LZ156_13	38	TGCTTTCATCCAGGTGCTTTCAGGGCCCATCGAATTTG	0		-24	Col-0	104596	pUBC-YFP-mod2	FALSE
col_4_teb_1_LB_4_104596_pUBC-YFP-mod2	wt	3	253	1	TRUE	5:21993485	reverse	5	21993485	LB	LZ156_13	0		4	CTTT	-28	Col-0	104596	pUBC-YFP-mod2	FALSE
col_4_teb_1_LB_4_104596_pUBC-YFP-mod2	wt	3	207	1	TRUE	5:22140991	forward	5	22140991	LB	LZ156_13	9	TATAATTTC	0		-46	Col-0	104596	pUBC-YFP-mod2	FALSE
col_4_teb_1_LB_4_104596_pUBC-YFP-mod2	wt	4	175	1	TRUE	5:22182962	forward	5	22182962	LB	LZ156_13	0		4	GATT	-42	Col-0	104596	pUBC-YFP-mod2	FALSE
col_4_teb_1_LB_4_104596_pUBC-YFP-mod2	wt	3	286	1	TRUE	5:22405474	forward	5	22405474	LB	LZ156_13	10	TTACTGTCTT	0		-33	Col-0	104596	pUBC-YFP-mod2	FALSE
col_4_teb_1_LB_4_104596_pUBC-YFP-mod2	wt	6	311	0.833333	TRUE	5:22874490	forward	5	22874490	LB	LZ156_13	0		1	T	-20	Col-0	104596	pUBC-YFP-mod2	FALSE
col_4_teb_1_LB_4_104596_pUBC-YFP-mod2	wt	4	331	0.75	TRUE	5:22874499	reverse	5	22874499	LB	LZ156_13	0		5	TCAGG	-24	Col-0	104596	pUBC-YFP-mod2	FALSE
col_4_teb_1_LB_4_104596_pUBC-YFP-mod2	wt	6	232	0.833333	TRUE	5:23695826	forward	5	23695826	LB	LZ156_13	0		0		-35	Col-0	104596	pUBC-YFP-mod2	FALSE
col_4_teb_1_LB_4_104596_pUBC-YFP-mod2	wt	3	146	1	TRUE	5:24093294	forward	5	24093294	LB	LZ156_13	11	ACACCACAATA	0		-43	Col-0	104596	pUBC-YFP-mod2	FALSE
col_4_teb_1_LB_4_104596_pUBC-YFP-mod2	wt	4	113	1	TRUE	5:24093304	reverse	5	24093304	LB	LZ156_13	0		4	TCCA	-36	Col-0	104596	pUBC-YFP-mod2	FALSE
col_4_teb_1_LB_4_104596_pUBC-YFP-mod2	wt	13	348	0.928571	TRUE	5:25417775	forward	5	25417775	LB	LZ156_13	0		4	TTCA	-26	Col-0	104596	pUBC-YFP-mod2	FALSE
col_4_teb_1_LB_4_104596_pUBC-YFP-mod2	wt	3	248	1	TRUE	5:25677092	reverse	5	25677092	LB	LZ156_13	0		5	TCCGA	-55	Col-0	104596	pUBC-YFP-mod2	FALSE
col_4_teb_1_LB_4_104596_pUBC-YFP-mod2	wt	4	124	1	TRUE	5:25791512	forward	5	25791512	LB	LZ156_13	8	GTACCACG	0		-39	Col-0	104596	pUBC-YFP-mod2	FALSE
col_4_teb_1_LB_4_104596_pUBC-YFP-mod2	wt	5	326	1	TRUE	5:25898502	forward	5	25898502	LB	LZ156_13	0		5	TTTCA	-26	Col-0	104596	pUBC-YFP-mod2	FALSE
col_4_teb_1_LB_4_104596_pUBC-YFP-mod2	wt	9	382	1	TRUE	5:25916818	reverse	5	25916818	LB	LZ156_13	0		2	TC	-38	Col-0	104596	pUBC-YFP-mod2	FALSE
col_4_teb_1_LB_4_104596_pUBC-YFP-mod2	wt	15	266	0.875	TRUE	5:26328806	reverse	5	26328806	LB	LZ156_13	64	GTGGATGCTTGAATTACTGTCTTTCAGGAGGTTCATCCAGGTGCTTTCAGGAGGTTTACACCAC	0		-53	Col-0	104596	pUBC-YFP-mod2	FALSE
col_4_teb_1_LB_4_104596_pUBC-YFP-mod2	wt	4	229	1	TRUE	5:26379910	forward	5	26379910	LB	LZ156_13	0		0		-25	Col-0	104596	pUBC-YFP-mod2	FALSE
col_4_teb_1_LB_4_104596_pUBC-YFP-mod2	wt	8	311	1	TRUE	5:26806327	reverse	5	26806327	LB	LZ156_13	0		2	CT	-47	Col-0	104596	pUBC-YFP-mod2	FALSE
col_4_teb_1_LB_4_104596_pUBC-YFP-mod2	wt	3	177	1	TRUE	5:26954915	reverse	5	26954915	LB	LZ156_13	0		4	CCTT	-46	Col-0	104596	pUBC-YFP-mod2	FALSE
col_4_teb_1_LB_4_104596_pUBC-YFP-mod2	wt	3	559	1	TRUE	5:26961016	reverse	5	26961016	LB	LZ156_13	0		3	TTG	-45	Col-0	104596	pUBC-YFP-mod2	FALSE
col_4_teb_1_LB_4_104596_pUBC-YFP-mod2	wt	24	391	0.875	TRUE	5:24217948	forward	5	24217948	LB	LZ156_13	0		4	TTTA	-17	Col-0	104596	pUBC-YFP-mod2	FALSE
col_4_teb_1_LB_4_104596_pUBC-YFP-mod2	wt	3	149	1	TRUE	5:7165564	reverse	5	7165564	LB	LZ156_13	0		1	T	-20	Col-0	104596	pUBC-YFP-mod2	FALSE
col_4_teb_1_LB_4_104596_pUBC-YFP-mod2	wt	4	240	1	TRUE	5:2119767	forward	5	2119767	LB	LZ156_13	5	TTATG	0		-10	Col-0	104596	pUBC-YFP-mod2	FALSE
col_4_teb_1_LB_4_104596_pUBC-YFP-mod2	wt	4	255	1	TRUE	5:26286101	forward	5	26286101	LB	LZ156_13	0		2	AC	-16	Col-0	104596	pUBC-YFP-mod2	FALSE
col_4_teb_1_LB_4_104596_pUBC-YFP-mod2	wt	5	139	1	TRUE	5:18580367	forward	5	18580367	LB	LZ156_13	0		1	A	-17	Col-0	104596	pUBC-YFP-mod2	FALSE
col_4_teb_1_LB_4_104596_pUBC-YFP-mod2	wt	3	171	1	TRUE	5:1232848	reverse	5	1232848	LB	LZ156_13	0		4	ACAC	-14	Col-0	104596	pUBC-YFP-mod2	FALSE
col_4_teb_1_LB_4_104596_pUBC-YFP-mod2	wt	34	568	1	TRUE	5:10719126	reverse	5	10719126	LB	LZ156_13	0		1	T	-18	Col-0	104596	pUBC-YFP-mod2	FALSE
col_4_teb_1_LB_4_104596_pUBC-YFP-mod2	wt	5	242	1	TRUE	5:23229798	forward	5	23229798	LB	LZ156_13	1	T	0		-8	Col-0	104596	pUBC-YFP-mod2	FALSE
col_4_teb_1_LB_4_104596_pUBC-YFP-mod2	wt	7	257	0.857143	TRUE	5:14102729	reverse	5	14102729	LB	LZ156_13	0		1	A	-15	Col-0	104596	pUBC-YFP-mod2	FALSE
col_4_teb_1_LB_4_104596_pUBC-YFP-mod2	wt	3	369	1	TRUE	5:19428942	reverse	5	19428942	LB	LZ156_13	0		4	GTTT	-18	Col-0	104596	pUBC-YFP-mod2	FALSE
col_4_teb_1_LB_4_104596_pUBC-YFP-mod2	wt	13	455	1	TRUE	5:20229982	reverse	5	20229982	LB	LZ156_13	0		3	ACA	-15	Col-0	104596	pUBC-YFP-mod2	FALSE
col_4_teb_1_LB_4_104596_pUBC-YFP-mod2	wt	3	161	1	TRUE	5:25570001	reverse	5	25570001	LB	LZ156_13	8	CGAGAGAC	0		-6	Col-0	104596	pUBC-YFP-mod2	FALSE
col_4_teb_1_LB_4_104596_pUBC-YFP-mod2	wt	23	387	1	TRUE	5:1922443	reverse	5	1922443	LB	LZ156_13	11	AAAATAATGTT	0		-12	Col-0	104596	pUBC-YFP-mod2	FALSE
col_4_teb_1_LB_4_104596_pUBC-YFP-mod2	wt	12	416	0.916667	TRUE	5:25055926	forward	5	25055926	LB	LZ156_13	6	TCACAT	0		-18	Col-0	104596	pUBC-YFP-mod2	FALSE
col_4_teb_1_LB_4_104596_pUBC-YFP-mod2	wt	3	183	1	TRUE	5:22839265	reverse	5	22839265	LB	LZ156_13	0		4	AATA	-7	Col-0	104596	pUBC-YFP-mod2	FALSE
col_4_teb_1_LB_4_104596_pUBC-YFP-mod2	wt	6	206	1	TRUE	5:25006284	reverse	5	25006284	LB	LZ156_13	42	ATCAGATGCTGCTCAAGTCTAAAGTCTCAAGGTAACGCAGTG	0		-21	Col-0	104596	pUBC-YFP-mod2	FALSE
col_4_teb_1_LB_4_104596_pUBC-YFP-mod2	wt	3	131	1	TRUE	5:6916112	forward	5	6916112	LB	LZ156_13	5	TGTCC	0		2	Col-0	104596	pUBC-YFP-mod2	FALSE
col_4_teb_1_LB_4_104596_pUBC-YFP-mod2	wt	4	244	1	TRUE	5:1110667	reverse	5	1110667	LB	LZ156_13	2	AA	0		0	Col-0	104596	pUBC-YFP-mod2	FALSE
col_4_teb_1_LB_4_104596_pUBC-YFP-mod2	wt	14	242	0.928571	TRUE	5:1922438	forward	5	1922438	LB	LZ156_13	0		4	TTTA	-17	Col-0	104596	pUBC-YFP-mod2	FALSE
col_4_teb_1_LB_4_104596_pUBC-YFP-mod2	wt	11	347	0.909091	TRUE	5:2292254	reverse	5	2292254	LB	LZ156_13	0		3	ACA	-10	Col-0	104596	pUBC-YFP-mod2	FALSE
col_4_teb_1_LB_4_104596_pUBC-YFP-mod2	wt	13	339	0.933333	TRUE	5:6757767	forward	5	6757767	LB	LZ156_13	2	GA	0		-6	Col-0	104596	pUBC-YFP-mod2	FALSE
col_4_teb_1_LB_4_104596_pUBC-YFP-mod2	wt	13	281	0.923077	TRUE	5:1014706	reverse	5	1014706	LB	LZ156_13	0		3	TTT	-18	Col-0	104596	pUBC-YFP-mod2	FALSE
col_4_teb_1_LB_4_104596_pUBC-YFP-mod2	wt	7	176	0.857143	TRUE	5:6766582	forward	5	6766582	LB	LZ156_13	15	GTCAGTTCGGTGTCA	0		0	Col-0	104596	pUBC-YFP-mod2	FALSE
col_4_teb_1_LB_4_104596_pUBC-YFP-mod2	wt	4	213	0.75	TRUE	5:21532410	forward	5	21532410	LB	LZ156_13	0		5	ACAAT	-8	Col-0	104596	pUBC-YFP-mod2	FALSE
col_4_teb_1_LB_4_104596_pUBC-YFP-mod2	wt	5	244	1	TRUE	5:14619133	reverse	5	14619133	LB	LZ156_13	0		4	TTTA	-17	Col-0	104596	pUBC-YFP-mod2	FALSE
col_4_teb_1_LB_4_104596_pUBC-YFP-mod2	wt	7	115	0.857143	TRUE	5:266493	forward	5	266493	LB	LZ156_13	10	AAACGGCTAA	0		0	Col-0	104596	pUBC-YFP-mod2	FALSE
col_4_teb_1_LB_4_104596_pUBC-YFP-mod2	wt	8	298	1	TRUE	5:21655549	reverse	5	21655549	LB	LZ156_13	0		6	TTACAC	-14	Col-0	104596	pUBC-YFP-mod2	FALSE
col_4_teb_1_LB_4_104596_pUBC-YFP-mod2	wt	3	363	1	TRUE	5:23102334	forward	5	23102334	LB	LZ156_13	4	CCTA	0		-16	Col-0	104596	pUBC-YFP-mod2	FALSE
col_4_teb_1_LB_4_104596_pUBC-YFP-mod2	wt	4	263	0.75	TRUE	5:11612958	forward	5	11612958	LB	LZ156_13	0		4	ACAA	-9	Col-0	104596	pUBC-YFP-mod2	FALSE
col_4_teb_1_LB_4_104596_pUBC-YFP-mod2	wt	18	356	1	TRUE	5:13057584	reverse	5	13057584	LB	LZ156_13	0		0		-10	Col-0	104596	pUBC-YFP-mod2	FALSE
col_4_teb_1_LB_4_104596_pUBC-YFP-mod2	wt	9	414	1	TRUE	5:20217759	forward	5	20217759	LB	LZ156_13	3	CCG	0		-16	Col-0	104596	pUBC-YFP-mod2	FALSE
col_4_teb_1_LB_4_104596_pUBC-YFP-mod2	wt	5	265	1	TRUE	5:19090335	reverse	5	19090335	LB	LZ156_13	5	TAGCT	0		0	Col-0	104596	pUBC-YFP-mod2	FALSE
col_4_teb_1_LB_4_104596_pUBC-YFP-mod2	wt	8	220	1	TRUE	5:9166601	forward	5	9166601	LB	LZ156_13	21	TCTCTTTTATATCAGTCACTT	0		-6	Col-0	104596	pUBC-YFP-mod2	FALSE
col_4_teb_1_LB_4_104596_pUBC-YFP-mod2	wt	8	205	1	TRUE	5:21560438	reverse	5	21560438	LB	LZ156_13	0		6	ACAATA	-7	Col-0	104596	pUBC-YFP-mod2	FALSE
col_4_teb_1_LB_4_104596_pUBC-YFP-mod2	wt	5	257	1	TRUE	5:5390506	forward	5	5390506	LB	LZ156_13	0		1	T	-1	Col-0	104596	pUBC-YFP-mod2	FALSE
col_4_teb_1_LB_4_104596_pUBC-YFP-mod2	wt	4	256	1	TRUE	5:27735	reverse	5	27735	LB	LZ156_13	29	CGCTCGATGACGCCAACTACCTCTGATGA	0		-10	Col-0	104596	pUBC-YFP-mod2	FALSE
col_4_teb_1_LB_4_104596_pUBC-YFP-mod2	wt	3	124	1	TRUE	5:16322022	forward	5	16322022	LB	LZ156_13	0		4	ACAA	-9	Col-0	104596	pUBC-YFP-mod2	FALSE
col_4_teb_1_LB_4_104596_pUBC-YFP-mod2	wt	3	210	1	TRUE	5:3153846	forward	5	3153846	LB	LZ156_13	3	AAG	0		0	Col-0	104596	pUBC-YFP-mod2	FALSE
col_4_teb_1_LB_4_104596_pUBC-YFP-mod2	wt	3	294	1	TRUE	5:3062768	reverse	5	3062768	LB	LZ156_13	12	GTGAACTGACCT	0		0	Col-0	104596	pUBC-YFP-mod2	FALSE
col_4_teb_1_LB_4_104596_pUBC-YFP-mod2	wt	4	143	1	TRUE	5:15652251	forward	5	15652251	LB	LZ156_13	0		2	AC	-11	Col-0	104596	pUBC-YFP-mod2	FALSE
col_4_teb_1_LB_4_104596_pUBC-YFP-mod2	wt	12	374	0.916667	TRUE	5:26390939	forward	5	26390939	LB	LZ156_13	2	AA	0		-5	Col-0	104596	pUBC-YFP-mod2	FALSE
col_4_teb_1_LB_4_104596_pUBC-YFP-mod2	wt	3	436	1	TRUE	5:6225623	reverse	5	6225623	LB	LZ156_13	2	CA	0		-8	Col-0	104596	pUBC-YFP-mod2	FALSE
col_4_teb_1_LB_4_104596_pUBC-YFP-mod2	wt	10	350	0.9	TRUE	5:4357345	forward	5	4357345	LB	LZ156_13	10	CGTCTATATC	0		-9	Col-0	104596	pUBC-YFP-mod2	FALSE
col_4_teb_1_LB_4_104596_pUBC-YFP-mod2	wt	3	169	1	TRUE	5:9791366	forward	5	9791366	LB	LZ156_13	10	AAAAGGGAGG	0		0	Col-0	104596	pUBC-YFP-mod2	FALSE
col_4_teb_1_LB_4_104596_pUBC-YFP-mod2	wt	5	241	1	TRUE	5:107803	reverse	5	107803	LB	LZ156_13	0		4	ATCC	-2	Col-0	104596	pUBC-YFP-mod2	FALSE
col_4_teb_1_LB_4_104596_pUBC-YFP-mod2	wt	8	388	0.875	TRUE	5:17360187	reverse	5	17360187	LB	LZ156_13	8	TTACATAT	0		-3	Col-0	104596	pUBC-YFP-mod2	FALSE
col_4_teb_1_LB_4_104596_pUBC-YFP-mod2	wt	3	254	1	TRUE	5:3956191	reverse	5	3956191	LB	LZ156_13	0		2	AT	-6	Col-0	104596	pUBC-YFP-mod2	FALSE
col_4_teb_1_LB_4_104596_pUBC-YFP-mod2	wt	4	198	1	TRUE	5:7990520	reverse	5	7990520	LB	LZ156_13	0		6	CCACAA	-9	Col-0	104596	pUBC-YFP-mod2	FALSE
col_4_teb_1_LB_4_104596_pUBC-YFP-mod2	wt	7	304	1	TRUE	5:23620931	forward	5	23620931	LB	LZ156_13	0		2	TA	-7	Col-0	104596	pUBC-YFP-mod2	FALSE
col_4_teb_1_LB_4_104596_pUBC-YFP-mod2	wt	3	237	1	TRUE	5:10544899	forward	5	10544899	LB	LZ156_13	11	AGTGTAGATAC	0		-4	Col-0	104596	pUBC-YFP-mod2	FALSE
col_4_teb_1_LB_4_104596_pUBC-YFP-mod2	wt	3	198	1	TRUE	5:3864166	reverse	5	3864166	LB	LZ156_13	0		5	TCCTG	0	Col-0	104596	pUBC-YFP-mod2	FALSE
col_4_teb_1_LB_4_104596_pUBC-YFP-mod2	wt	3	112	1	TRUE	5:26572524	reverse	5	26572524	LB	LZ156_13	2	GT	0		1	Col-0	104596	pUBC-YFP-mod2	FALSE
col_4_teb_1_LB_4_104596_pUBC-YFP-mod2	wt	7	203	1	TRUE	5:280382	forward	5	280382	LB	LZ156_13	0		1	T	-6	Col-0	104596	pUBC-YFP-mod2	FALSE
col_4_teb_1_LB_4_104596_pUBC-YFP-mod2	wt	3	186	1	TRUE	5:6152947	forward	5	6152947	LB	LZ156_13	0		3	ACA	-10	Col-0	104596	pUBC-YFP-mod2	FALSE
col_4_teb_1_LB_4_104596_pUBC-YFP-mod2	wt	6	216	0.833333	TRUE	5:23495667	forward	5	23495667	LB	LZ156_13	0		2	AA	-9	Col-0	104596	pUBC-YFP-mod2	FALSE
col_4_teb_1_LB_4_104596_pUBC-YFP-mod2	wt	3	117	1	TRUE	5:14619113	forward	5	14619113	LB	LZ156_13	0		3	CAA	-9	Col-0	104596	pUBC-YFP-mod2	FALSE
col_4_teb_1_LB_4_104596_pUBC-YFP-mod2	wt	3	149	1	TRUE	5:26960090	forward	5	26960090	LB	LZ156_13	0		1	A	-15	Col-0	104596	pUBC-YFP-mod2	FALSE
col_4_teb_1_LB_4_104596_pUBC-YFP-mod2	wt	4	283	1	TRUE	5:5539885	reverse	5	5539885	LB	LZ156_13	7	CGCCATG	0		-26	Col-0	104596	pUBC-YFP-mod2	FALSE
col_4_teb_1_LB_4_104596_pUBC-YFP-mod2	wt	3	417	1	TRUE	5:13382737	forward	5	13382737	LB	LZ156_13	0		4	CACC	-13	Col-0	104596	pUBC-YFP-mod2	FALSE
col_4_teb_1_LB_4_104596_pUBC-YFP-mod2	wt	3	175	1	TRUE	5:5867958	reverse	5	5867958	LB	LZ156_13	0		6	CCACAA	-9	Col-0	104596	pUBC-YFP-mod2	FALSE
col_4_teb_1_LB_4_104596_pUBC-YFP-mod2	wt	4	196	1	TRUE	5:22549635	reverse	5	22549635	LB	LZ156_13	18	CGTGGGCCCAATTTCAGG	0		-22	Col-0	104596	pUBC-YFP-mod2	FALSE
col_4_teb_1_LB_4_104596_pUBC-YFP-mod2	wt	3	204	1	TRUE	5:24207612	reverse	5	24207612	LB	LZ156_13	0		5	TTTAC	-16	Col-0	104596	pUBC-YFP-mod2	FALSE
col_4_teb_1_LB_4_104596_pUBC-YFP-mod2	wt	3	218	1	TRUE	5:2529570	forward	5	2529570	LB	LZ156_13	7	TGATTGG	0		-10	Col-0	104596	pUBC-YFP-mod2	FALSE
col_4_teb_1_LB_4_104596_pUBC-YFP-mod2	wt	4	198	1	TRUE	5:23312801	forward	5	23312801	LB	LZ156_13	0		3	CAA	-9	Col-0	104596	pUBC-YFP-mod2	FALSE
col_4_teb_1_LB_4_104596_pUBC-YFP-mod2	wt	3	120	1	TRUE	5:23648816	forward	5	23648816	LB	LZ156_13	7	TCTCTCA	0		0	Col-0	104596	pUBC-YFP-mod2	FALSE
col_4_teb_1_LB_4_104596_pUBC-YFP-mod2	wt	4	175	1	TRUE	5:17423244	forward	5	17423244	LB	LZ156_13	0		2	AC	-14	Col-0	104596	pUBC-YFP-mod2	FALSE
col_4_teb_1_LB_4_104596_pUBC-YFP-mod2	wt	4	471	0.75	TRUE	5:7921589	reverse	5	7921589	LB	LZ156_13	6	AAAGCA	0		0	Col-0	104596	pUBC-YFP-mod2	FALSE
col_4_teb_1_LB_4_104596_pUBC-YFP-mod2	wt	9	168	0.888889	TRUE	Mt:359991	forward	Mt	359991	LB	LZ156_13	0		6	CTTGAT	-43	Col-0	104596	pUBC-YFP-mod2	FALSE
col_4_teb_1_LB_4_104596_pUBC-YFP-mod2	wt	24	294	0.92	TRUE	1:23689466	reverse	1	23689466	LB	LZ156_13	17	TGATAGAAGTATTTTAC	0		-6	Col-0	104596	pUBC-YFP-mod2	TRUE
col_4_teb_1_LB_4_104596_pUBC-YFP-mod2	wt	40	479	0.95	TRUE	1:30341124	reverse	1	30341124	LB	LZ156_13	0		5	ATATA	-5	Col-0	104596	pUBC-YFP-mod2	TRUE
col_4_teb_1_LB_4_104596_pUBC-YFP-mod2	wt	94	430	0.87234	TRUE	1:8281118	forward	1	8281118	LB	LZ156_13	0		1	C	-3	Col-0	104596	pUBC-YFP-mod2	TRUE
col_4_teb_1_LB_4_104596_pUBC-YFP-mod2	wt	13	377	0.923077	TRUE	1:8506797	forward	1	8506797	LB	LZ156_13	0		3	CTG	0	Col-0	104596	pUBC-YFP-mod2	TRUE
col_4_teb_1_LB_4_104596_pUBC-YFP-mod2	wt	47	496	0.851064	TRUE	2:12249413	forward	2	12249413	LB	LZ156_13	2	AT	0		-9	Col-0	104596	pUBC-YFP-mod2	TRUE
col_4_teb_1_LB_4_104596_pUBC-YFP-mod2	wt	19	289	0.894737	TRUE	2:19681864	forward	2	19681864	LB	LZ156_13	2	CC	0		-5	Col-0	104596	pUBC-YFP-mod2	TRUE
col_4_teb_1_LB_4_104596_pUBC-YFP-mod2	wt	10	324	1	TRUE	3:22647518	forward	3	22647518	LB	LZ156_13	0		3	CTG	0	Col-0	104596	pUBC-YFP-mod2	TRUE
col_4_teb_1_LB_4_104596_pUBC-YFP-mod2	wt	17	322	1	TRUE	4:17777429	forward	4	17777429	LB	LZ156_13	0		6	ATATAT	-4	Col-0	104596	pUBC-YFP-mod2	TRUE
col_4_teb_1_LB_1_104596_pUBC-YFP-mod0	teb	85	491	0.941176	TRUE	4:519397	reverse	4	519397	LB	LZ157_2	0		3	TTA	-45	Col-0	104596	pUBC-YFP-mod0	TRUE
col_4_teb_1_LB_4_104596_pUBC-YFP-mod2	wt	18	295	0.888889	TRUE	5:20454161	reverse	5	20454161	LB	LZ156_13	2	TT	0		-6	Col-0	104596	pUBC-YFP-mod2	TRUE
col_4_teb_1_LB_4_104596_pUBC-YFP-mod2	wt	11	418	0.909091	TRUE	5:5390576	reverse	5	5390576	LB	LZ156_13	4	GGAG	0		0	Col-0	104596	pUBC-YFP-mod2	TRUE
col_4_teb_1_LB_4_104596_pUBC-YFP-mod2	wt	22	275	0.818182	TRUE	5:7483400	forward	5	7483400	LB	LZ156_13	7	TGATTCG	0		-1	Col-0	104596	pUBC-YFP-mod2	TRUE
col_4_teb_1_RB_1_104596_pUBC-YFP-mod0	teb	3	218	1	TRUE	1:4446660	forward	1	4446660	RB	LZ157_2	0		4	TTGA	0	Col-0	104596	pUBC-YFP-mod0	FALSE
col_4_teb_1_RB_4_104596_pUBC-YFP-mod2	wt	8	370	0.875	TRUE	1:883432	forward	1	883432	RB	LZ156_13	3	TGG	0		-34	Col-0	104596	pUBC-YFP-mod2	FALSE
col_4_teb_1_RB_4_104596_pUBC-YFP-mod2	wt	3	181	1	TRUE	1:2217302	reverse	1	2217302	RB	LZ156_13	0		0		-1	Col-0	104596	pUBC-YFP-mod2	FALSE
col_4_teb_1_RB_4_104596_pUBC-YFP-mod2	wt	6	192	1	TRUE	1:3676134	forward	1	3676134	RB	LZ156_13	0		1	G	-21	Col-0	104596	pUBC-YFP-mod2	FALSE
col_4_teb_1_RB_4_104596_pUBC-YFP-mod2	wt	3	220	1	TRUE	1:3929680	forward	1	3929680	RB	LZ156_13	2	TT	0		-34	Col-0	104596	pUBC-YFP-mod2	FALSE
col_4_teb_1_RB_4_104596_pUBC-YFP-mod2	wt	3	117	1	TRUE	1:4497042	reverse	1	4497042	RB	LZ156_13	0		5	AAGGT	-32	Col-0	104596	pUBC-YFP-mod2	FALSE
col_4_teb_1_RB_4_104596_pUBC-YFP-mod2	wt	3	203	1	TRUE	1:4590400	reverse	1	4590400	RB	LZ156_13	0		3	GAC	-5	Col-0	104596	pUBC-YFP-mod2	FALSE
col_4_teb_1_RB_4_104596_pUBC-YFP-mod2	wt	4	214	1	TRUE	1:5489048	forward	1	5489048	RB	LZ156_13	0		4	TAAC	-29	Col-0	104596	pUBC-YFP-mod2	FALSE
col_4_teb_1_RB_4_104596_pUBC-YFP-mod2	wt	12	259	0.916667	TRUE	1:6522125	reverse	1	6522125	RB	LZ156_13	37	TCACAAGGTAACGCATCCAGGCCCACAATACATCCAG	0		-34	Col-0	104596	pUBC-YFP-mod2	FALSE
col_4_teb_1_RB_4_104596_pUBC-YFP-mod2	wt	3	243	1	TRUE	1:6755129	reverse	1	6755129	RB	LZ156_13	1	C	0		-12	Col-0	104596	pUBC-YFP-mod2	FALSE
col_4_teb_1_RB_4_104596_pUBC-YFP-mod2	wt	3	219	1	TRUE	1:7200631	forward	1	7200631	RB	LZ156_13	8	GGTCCGGC	0		-12	Col-0	104596	pUBC-YFP-mod2	FALSE
col_4_teb_1_RB_4_104596_pUBC-YFP-mod2	wt	4	227	1	TRUE	1:7346986	forward	1	7346986	RB	LZ156_13	14	CTCAAGGTAACACC	0		-24	Col-0	104596	pUBC-YFP-mod2	FALSE
col_4_teb_1_RB_4_104596_pUBC-YFP-mod2	wt	9	459	0.888889	TRUE	1:7567829	reverse	1	7567829	RB	LZ156_13	18	AAGATATATCTTTCCTTG	0		-25	Col-0	104596	pUBC-YFP-mod2	FALSE
col_4_teb_1_RB_4_104596_pUBC-YFP-mod2	wt	93	630	0.924731	TRUE	1:8315014	reverse	1	8315014	RB	LZ156_13	0		5	TGTGA	0	Col-0	104596	pUBC-YFP-mod2	FALSE
col_4_teb_1_RB_4_104596_pUBC-YFP-mod2	wt	3	154	1	TRUE	1:9203639	forward	1	9203639	RB	LZ156_13	0		5	GTTTG	-21	Col-0	104596	pUBC-YFP-mod2	FALSE
col_4_teb_1_RB_4_104596_pUBC-YFP-mod2	wt	4	260	1	TRUE	1:9322229	reverse	1	9322229	RB	LZ156_13	0		2	GA	0	Col-0	104596	pUBC-YFP-mod2	FALSE
col_4_teb_1_RB_4_104596_pUBC-YFP-mod2	wt	3	267	1	TRUE	1:10413900	reverse	1	10413900	RB	LZ156_13	2	AA	0		-5	Col-0	104596	pUBC-YFP-mod2	FALSE
col_4_teb_1_RB_4_104596_pUBC-YFP-mod2	wt	3	408	1	TRUE	1:11084795	reverse	1	11084795	RB	LZ156_13	0		3	CGC	-13	Col-0	104596	pUBC-YFP-mod2	FALSE
col_4_teb_1_RB_4_104596_pUBC-YFP-mod2	wt	3	146	1	TRUE	1:11681836	reverse	1	11681836	RB	LZ156_13	11	TCCAGGTGCTT	0		-30	Col-0	104596	pUBC-YFP-mod2	FALSE
col_4_teb_1_RB_4_104596_pUBC-YFP-mod2	wt	57	398	0.947368	TRUE	1:11908364	reverse	1	11908364	RB	LZ156_13	0		4	GTGA	0	Col-0	104596	pUBC-YFP-mod2	FALSE
col_4_teb_1_RB_4_104596_pUBC-YFP-mod2	wt	6	308	1	TRUE	1:12120293	reverse	1	12120293	RB	LZ156_13	0		0		-1	Col-0	104596	pUBC-YFP-mod2	FALSE
col_4_teb_1_RB_4_104596_pUBC-YFP-mod2	wt	16	416	0.9375	TRUE	1:12546452	forward	1	12546452	RB	LZ156_13	8	AGCTTTCA	0		-8	Col-0	104596	pUBC-YFP-mod2	FALSE
col_4_teb_1_RB_4_104596_pUBC-YFP-mod2	wt	3	177	1	TRUE	1:13976408	reverse	1	13976408	RB	LZ156_13	0		1	C	-15	Col-0	104596	pUBC-YFP-mod2	FALSE
col_4_teb_1_RB_4_104596_pUBC-YFP-mod2	wt	9	310	0.777778	TRUE	1:17452051	forward	1	17452051	RB	LZ156_13	0		2	GA	0	Col-0	104596	pUBC-YFP-mod2	FALSE
col_4_teb_1_RB_4_104596_pUBC-YFP-mod2	wt	3	143	1	TRUE	1:18449137	reverse	1	18449137	RB	LZ156_13	3	CCA	0		-44	Col-0	104596	pUBC-YFP-mod2	FALSE
col_4_teb_1_RB_4_104596_pUBC-YFP-mod2	wt	3	178	0.75	TRUE	1:18960100	forward	1	18960100	RB	LZ156_13	3	ATA	0		-25	Col-0	104596	pUBC-YFP-mod2	FALSE
col_4_teb_1_RB_4_104596_pUBC-YFP-mod2	wt	5	481	1	TRUE	1:20180653	reverse	1	20180653	RB	LZ156_13	0		2	GA	0	Col-0	104596	pUBC-YFP-mod2	FALSE
col_4_teb_1_RB_4_104596_pUBC-YFP-mod2	wt	6	233	1	TRUE	1:20967449	forward	1	20967449	RB	LZ156_13	0		0		-32	Col-0	104596	pUBC-YFP-mod2	FALSE
col_4_teb_1_RB_4_104596_pUBC-YFP-mod2	wt	4	226	1	TRUE	1:22714211	reverse	1	22714211	RB	LZ156_13	0		3	TGT	-2	Col-0	104596	pUBC-YFP-mod2	FALSE
col_4_teb_1_RB_4_104596_pUBC-YFP-mod2	wt	5	283	0.8	TRUE	1:23192270	reverse	1	23192270	RB	LZ156_13	0		1	C	-29	Col-0	104596	pUBC-YFP-mod2	FALSE
col_4_teb_1_RB_4_104596_pUBC-YFP-mod2	wt	58	473	0.931034	TRUE	1:23689426	forward	1	23689426	RB	LZ156_13	9	ATGTATTCA	0		-5	Col-0	104596	pUBC-YFP-mod2	FALSE
col_4_teb_1_RB_4_104596_pUBC-YFP-mod2	wt	5	269	0.8	TRUE	1:26038585	forward	1	26038585	RB	LZ156_13	3	TGT	0		-7	Col-0	104596	pUBC-YFP-mod2	FALSE
col_4_teb_1_RB_4_104596_pUBC-YFP-mod2	wt	3	196	1	TRUE	1:28218727	reverse	1	28218727	RB	LZ156_13	0		0		-31	Col-0	104596	pUBC-YFP-mod2	FALSE
col_4_teb_1_RB_4_104596_pUBC-YFP-mod2	wt	4	218	1	TRUE	1:28811241	forward	1	28811241	RB	LZ156_13	0		0		-1	Col-0	104596	pUBC-YFP-mod2	FALSE
col_4_teb_1_RB_4_104596_pUBC-YFP-mod2	wt	3	351	1	TRUE	1:28949599	forward	1	28949599	RB	LZ156_13	0		4	CTTT	-10	Col-0	104596	pUBC-YFP-mod2	FALSE
col_4_teb_1_RB_4_104596_pUBC-YFP-mod2	wt	7	357	1	TRUE	1:29441307	forward	1	29441307	RB	LZ156_13	0		0		-1	Col-0	104596	pUBC-YFP-mod2	FALSE
col_4_teb_1_RB_4_104596_pUBC-YFP-mod2	wt	4	376	1	TRUE	1:29581269	forward	1	29581269	RB	LZ156_13	0		2	GA	0	Col-0	104596	pUBC-YFP-mod2	FALSE
col_4_teb_1_RB_4_104596_pUBC-YFP-mod2	wt	4	369	1	TRUE	1:7494138	reverse	1	7494138	RB	LZ156_13	0		3	ACA	2	Col-0	104596	pUBC-YFP-mod2	FALSE
col_4_teb_1_RB_4_104596_pUBC-YFP-mod2	wt	4	240	0.75	TRUE	1:7585845	reverse	1	7585845	RB	LZ156_13	0		3	ACA	2	Col-0	104596	pUBC-YFP-mod2	FALSE
col_4_teb_1_RB_4_104596_pUBC-YFP-mod2	wt	6	388	0.833333	TRUE	1:24568197	reverse	1	24568197	RB	LZ156_13	0		1	C	1	Col-0	104596	pUBC-YFP-mod2	FALSE
col_4_teb_1_RB_4_104596_pUBC-YFP-mod2	wt	3	512	1	TRUE	1:23773724	forward	1	23773724	RB	LZ156_13	0		2	AC	1	Col-0	104596	pUBC-YFP-mod2	FALSE
col_4_teb_1_RB_4_104596_pUBC-YFP-mod2	wt	13	335	1	TRUE	1:29192521	forward	1	29192521	RB	LZ156_13	0		1	A	0	Col-0	104596	pUBC-YFP-mod2	FALSE
col_4_teb_1_RB_4_104596_pUBC-YFP-mod2	wt	3	131	1	TRUE	1:13456323	forward	1	13456323	RB	LZ156_13	21	TTGGTCATCTAAAACGAGAGA	0		0	Col-0	104596	pUBC-YFP-mod2	FALSE
col_4_teb_1_RB_4_104596_pUBC-YFP-mod2	wt	6	371	0.833333	TRUE	1:1058160	forward	1	1058160	RB	LZ156_13	14	TCAAAGGAACTGAC	0		0	Col-0	104596	pUBC-YFP-mod2	FALSE
col_4_teb_1_RB_4_104596_pUBC-YFP-mod2	wt	9	304	1	TRUE	1:9591267	reverse	1	9591267	RB	LZ156_13	1	T	0		0	Col-0	104596	pUBC-YFP-mod2	FALSE
col_4_teb_1_RB_4_104596_pUBC-YFP-mod2	wt	4	286	1	TRUE	1:7982091	forward	1	7982091	RB	LZ156_13	0		1	A	0	Col-0	104596	pUBC-YFP-mod2	FALSE
col_4_teb_1_RB_4_104596_pUBC-YFP-mod2	wt	5	227	1	TRUE	1:25063305	forward	1	25063305	RB	LZ156_13	0		0		0	Col-0	104596	pUBC-YFP-mod2	FALSE
col_4_teb_1_RB_4_104596_pUBC-YFP-mod2	wt	14	564	0.857143	TRUE	1:12546476	reverse	1	12546476	RB	LZ156_13	11	GACTTTAGAGG	0		0	Col-0	104596	pUBC-YFP-mod2	FALSE
col_4_teb_1_RB_4_104596_pUBC-YFP-mod2	wt	3	162	1	TRUE	1:30258060	reverse	1	30258060	RB	LZ156_13	0		0		0	Col-0	104596	pUBC-YFP-mod2	FALSE
col_4_teb_1_RB_4_104596_pUBC-YFP-mod2	wt	9	216	1	TRUE	1:470295	reverse	1	470295	RB	LZ156_13	42	TAGTTTTGTATCTGATAGTTTAGTGATCGTTTACACCACAAT	0		0	Col-0	104596	pUBC-YFP-mod2	FALSE
col_4_teb_1_RB_4_104596_pUBC-YFP-mod2	wt	11	290	1	TRUE	1:26323302	reverse	1	26323302	RB	LZ156_13	2	TC	0		0	Col-0	104596	pUBC-YFP-mod2	FALSE
col_4_teb_1_RB_4_104596_pUBC-YFP-mod2	wt	3	202	1	TRUE	1:17133646	reverse	1	17133646	RB	LZ156_13	0		0		0	Col-0	104596	pUBC-YFP-mod2	FALSE
col_4_teb_1_RB_4_104596_pUBC-YFP-mod2	wt	3	200	1	TRUE	1:19444630	reverse	1	19444630	RB	LZ156_13	11	TTGAGCAATCA	0		0	Col-0	104596	pUBC-YFP-mod2	FALSE
col_4_teb_1_RB_4_104596_pUBC-YFP-mod2	wt	3	197	1	TRUE	1:27685566	forward	1	27685566	RB	LZ156_13	0		1	A	0	Col-0	104596	pUBC-YFP-mod2	FALSE
col_4_teb_1_RB_4_104596_pUBC-YFP-mod2	wt	7	190	1	TRUE	1:9092640	reverse	1	9092640	RB	LZ156_13	4	TCAG	0		0	Col-0	104596	pUBC-YFP-mod2	FALSE
col_4_teb_1_RB_4_104596_pUBC-YFP-mod2	wt	3	145	1	TRUE	1:7494131	forward	1	7494131	RB	LZ156_13	0		1	A	0	Col-0	104596	pUBC-YFP-mod2	FALSE
col_4_teb_1_RB_4_104596_pUBC-YFP-mod2	wt	3	145	1	TRUE	1:4334557	reverse	1	4334557	RB	LZ156_13	4	AAAT	0		0	Col-0	104596	pUBC-YFP-mod2	FALSE
col_4_teb_1_RB_4_104596_pUBC-YFP-mod2	wt	3	274	1	TRUE	1:20180669	reverse	1	20180669	RB	LZ156_13	29	GAAAAAATGGAAAGAGTGAAGGGTGTTTT	0		0	Col-0	104596	pUBC-YFP-mod2	FALSE
col_4_teb_1_RB_4_104596_pUBC-YFP-mod2	wt	7	479	1	TRUE	1:1097739	forward	1	1097739	RB	LZ156_13	13	GTGTAAACCTTCA	0		-1	Col-0	104596	pUBC-YFP-mod2	FALSE
col_4_teb_1_RB_4_104596_pUBC-YFP-mod2	wt	3	170	1	TRUE	1:5424524	reverse	1	5424524	RB	LZ156_13	2	TC	0		-1	Col-0	104596	pUBC-YFP-mod2	FALSE
col_4_teb_1_RB_4_104596_pUBC-YFP-mod2	wt	3	164	1	TRUE	1:4892210	reverse	1	4892210	RB	LZ156_13	30	TGTGTGTGTGTGTGGACTGCGTTTTCCTTT	0		-8	Col-0	104596	pUBC-YFP-mod2	FALSE
col_4_teb_1_RB_4_104596_pUBC-YFP-mod2	wt	5	196	1	TRUE	2:773460	forward	2	773460	RB	LZ156_13	0		2	GA	0	Col-0	104596	pUBC-YFP-mod2	FALSE
col_4_teb_1_RB_4_104596_pUBC-YFP-mod2	wt	4	172	1	TRUE	2:936307	forward	2	936307	RB	LZ156_13	2	TC	0		-7	Col-0	104596	pUBC-YFP-mod2	FALSE
col_4_teb_1_RB_4_104596_pUBC-YFP-mod2	wt	5	290	0.8	TRUE	2:2425275	reverse	2	2425275	RB	LZ156_13	1	C	0		-5	Col-0	104596	pUBC-YFP-mod2	FALSE
col_4_teb_1_RB_4_104596_pUBC-YFP-mod2	wt	4	404	0.75	TRUE	2:8142857	reverse	2	8142857	RB	LZ156_13	8	AGTTTGCG	0		-3	Col-0	104596	pUBC-YFP-mod2	FALSE
col_4_teb_1_RB_4_104596_pUBC-YFP-mod2	wt	6	208	0.833333	TRUE	2:9149641	reverse	2	9149641	RB	LZ156_13	0		2	AC	-5	Col-0	104596	pUBC-YFP-mod2	FALSE
col_4_teb_1_RB_4_104596_pUBC-YFP-mod2	wt	5	227	0.8	TRUE	2:9382356	forward	2	9382356	RB	LZ156_13	0		2	GA	0	Col-0	104596	pUBC-YFP-mod2	FALSE
col_4_teb_1_RB_4_104596_pUBC-YFP-mod2	wt	8	404	0.875	TRUE	2:9382376	reverse	2	9382376	RB	LZ156_13	0		4	GAAC	-15	Col-0	104596	pUBC-YFP-mod2	FALSE
col_4_teb_1_RB_4_104596_pUBC-YFP-mod2	wt	4	309	0.75	TRUE	2:11236899	reverse	2	11236899	RB	LZ156_13	0		2	GA	0	Col-0	104596	pUBC-YFP-mod2	FALSE
col_4_teb_1_RB_4_104596_pUBC-YFP-mod2	wt	3	156	1	TRUE	2:11357038	reverse	2	11357038	RB	LZ156_13	0		2	GA	0	Col-0	104596	pUBC-YFP-mod2	FALSE
col_4_teb_1_RB_4_104596_pUBC-YFP-mod2	wt	3	200	1	TRUE	2:11819534	reverse	2	11819534	RB	LZ156_13	0		3	TTG	-21	Col-0	104596	pUBC-YFP-mod2	FALSE
col_4_teb_1_RB_4_104596_pUBC-YFP-mod2	wt	12	282	0.923077	TRUE	2:14105562	reverse	2	14105562	RB	LZ156_13	13	CCCAAAGCGTTCT	0		-24	Col-0	104596	pUBC-YFP-mod2	FALSE
col_4_teb_1_RB_4_104596_pUBC-YFP-mod2	wt	3	182	1	TRUE	2:14766065	reverse	2	14766065	RB	LZ156_13	0		5	TCAAG	-34	Col-0	104596	pUBC-YFP-mod2	FALSE
col_4_teb_1_RB_4_104596_pUBC-YFP-mod2	wt	3	244	1	TRUE	2:15162673	reverse	2	15162673	RB	LZ156_13	0		2	GG	-7	Col-0	104596	pUBC-YFP-mod2	FALSE
col_4_teb_1_RB_4_104596_pUBC-YFP-mod2	wt	30	500	0.966667	TRUE	2:16152406	reverse	2	16152406	RB	LZ156_13	0		5	TGTGA	0	Col-0	104596	pUBC-YFP-mod2	FALSE
col_4_teb_1_RB_4_104596_pUBC-YFP-mod2	wt	3	299	1	TRUE	2:16222402	reverse	2	16222402	RB	LZ156_13	1	G	0		-3	Col-0	104596	pUBC-YFP-mod2	FALSE
col_4_teb_1_RB_4_104596_pUBC-YFP-mod2	wt	5	314	1	TRUE	2:17141566	reverse	2	17141566	RB	LZ156_13	0		2	GA	0	Col-0	104596	pUBC-YFP-mod2	FALSE
col_4_teb_1_RB_4_104596_pUBC-YFP-mod2	wt	13	553	0.933333	TRUE	2:17570324	reverse	2	17570324	RB	LZ156_13	8	CGTTATTT	0		-31	Col-0	104596	pUBC-YFP-mod2	FALSE
col_4_teb_1_RB_4_104596_pUBC-YFP-mod2	wt	3	201	1	TRUE	2:18595231	reverse	2	18595231	RB	LZ156_13	0		1	T	-22	Col-0	104596	pUBC-YFP-mod2	FALSE
col_4_teb_1_RB_4_104596_pUBC-YFP-mod2	wt	3	183	1	TRUE	2:18641421	reverse	2	18641421	RB	LZ156_13	11	CTAAAGTCTCA	0		-24	Col-0	104596	pUBC-YFP-mod2	FALSE
col_4_teb_1_RB_4_104596_pUBC-YFP-mod2	wt	6	319	1	TRUE	2:19251895	forward	2	19251895	RB	LZ156_13	0		2	GA	0	Col-0	104596	pUBC-YFP-mod2	FALSE
col_4_teb_1_RB_4_104596_pUBC-YFP-mod2	wt	5	186	1	TRUE	2:14890988	forward	2	14890988	RB	LZ156_13	21	TATCAGCTCACTCAAAGTCTT	0		1	Col-0	104596	pUBC-YFP-mod2	FALSE
col_4_teb_1_RB_4_104596_pUBC-YFP-mod2	wt	3	354	1	TRUE	2:97671	reverse	2	97671	RB	LZ156_13	0		0		1	Col-0	104596	pUBC-YFP-mod2	FALSE
col_4_teb_1_RB_4_104596_pUBC-YFP-mod2	wt	6	224	1	TRUE	2:15764107	forward	2	15764107	RB	LZ156_13	12	TTGACGTAATTT	0		0	Col-0	104596	pUBC-YFP-mod2	FALSE
col_4_teb_1_RB_4_104596_pUBC-YFP-mod2	wt	5	326	1	TRUE	2:9101180	forward	2	9101180	RB	LZ156_13	1	T	0		0	Col-0	104596	pUBC-YFP-mod2	FALSE
col_4_teb_1_RB_4_104596_pUBC-YFP-mod2	wt	6	295	1	TRUE	2:8057347	reverse	2	8057347	RB	LZ156_13	0		1	A	0	Col-0	104596	pUBC-YFP-mod2	FALSE
col_4_teb_1_RB_4_104596_pUBC-YFP-mod2	wt	3	265	1	TRUE	2:1161059	reverse	2	1161059	RB	LZ156_13	0		1	A	0	Col-0	104596	pUBC-YFP-mod2	FALSE
col_4_teb_1_RB_4_104596_pUBC-YFP-mod2	wt	4	288	1	TRUE	2:13314554	forward	2	13314554	RB	LZ156_13	0		0		0	Col-0	104596	pUBC-YFP-mod2	FALSE
col_4_teb_1_RB_4_104596_pUBC-YFP-mod2	wt	6	292	0.833333	TRUE	2:13463497	forward	2	13463497	RB	LZ156_13	26	TCACAGTGAGCATTGTATGCTAACGC	0		0	Col-0	104596	pUBC-YFP-mod2	FALSE
col_4_teb_1_RB_4_104596_pUBC-YFP-mod2	wt	8	323	0.875	TRUE	2:16460333	forward	2	16460333	RB	LZ156_13	35	GGAAGAGGACTATACGATAATGCAGTTTGGCTGGC	0		0	Col-0	104596	pUBC-YFP-mod2	FALSE
col_4_teb_1_RB_4_104596_pUBC-YFP-mod2	wt	3	206	1	TRUE	2:7877785	forward	2	7877785	RB	LZ156_13	0		1	A	0	Col-0	104596	pUBC-YFP-mod2	FALSE
col_4_teb_1_RB_4_104596_pUBC-YFP-mod2	wt	8	274	0.875	TRUE	3:343556	reverse	3	343556	RB	LZ156_13	0		1	A	0	Col-0	104596	pUBC-YFP-mod2	FALSE
col_4_teb_1_RB_4_104596_pUBC-YFP-mod2	wt	10	217	0.9	TRUE	3:1072031	reverse	3	1072031	RB	LZ156_13	0		2	TT	-22	Col-0	104596	pUBC-YFP-mod2	FALSE
col_4_teb_1_RB_4_104596_pUBC-YFP-mod2	wt	10	222	0.909091	TRUE	3:2356204	forward	3	2356204	RB	LZ156_13	0		4	GTGA	0	Col-0	104596	pUBC-YFP-mod2	FALSE
col_4_teb_1_RB_4_104596_pUBC-YFP-mod2	wt	4	151	1	TRUE	3:2419481	reverse	3	2419481	RB	LZ156_13	0		1	G	-1	Col-0	104596	pUBC-YFP-mod2	FALSE
col_4_teb_1_RB_4_104596_pUBC-YFP-mod2	wt	5	389	1	TRUE	3:2614714	reverse	3	2614714	RB	LZ156_13	0		2	GA	0	Col-0	104596	pUBC-YFP-mod2	FALSE
col_4_teb_1_RB_4_104596_pUBC-YFP-mod2	wt	9	305	0.777778	TRUE	3:2976532	reverse	3	2976532	RB	LZ156_13	0		2	GA	0	Col-0	104596	pUBC-YFP-mod2	FALSE
col_4_teb_1_RB_4_104596_pUBC-YFP-mod2	wt	28	353	0.928571	TRUE	3:3201140	forward	3	3201140	RB	LZ156_13	0		2	TG	-3	Col-0	104596	pUBC-YFP-mod2	FALSE
col_4_teb_1_RB_4_104596_pUBC-YFP-mod2	wt	29	507	0.862069	TRUE	3:3201200	reverse	3	3201200	RB	LZ156_13	0		3	GAC	-5	Col-0	104596	pUBC-YFP-mod2	FALSE
col_4_teb_1_RB_4_104596_pUBC-YFP-mod2	wt	8	416	0.875	TRUE	3:4085364	reverse	3	4085364	RB	LZ156_13	0		1	A	0	Col-0	104596	pUBC-YFP-mod2	FALSE
col_4_teb_1_RB_4_104596_pUBC-YFP-mod2	wt	6	219	1	TRUE	3:4388373	reverse	3	4388373	RB	LZ156_13	0		2	GA	0	Col-0	104596	pUBC-YFP-mod2	FALSE
col_4_teb_1_RB_4_104596_pUBC-YFP-mod2	wt	4	157	0.75	TRUE	3:5525202	reverse	3	5525202	RB	LZ156_13	0		3	TTT	-22	Col-0	104596	pUBC-YFP-mod2	FALSE
col_4_teb_1_RB_4_104596_pUBC-YFP-mod2	wt	4	264	1	TRUE	3:6759849	reverse	3	6759849	RB	LZ156_13	6	TTATCG	0		-6	Col-0	104596	pUBC-YFP-mod2	FALSE
col_4_teb_1_RB_4_104596_pUBC-YFP-mod2	wt	3	125	1	TRUE	3:9028855	forward	3	9028855	RB	LZ156_13	20	GCTATCAGATGCTTCTTGAT	0		-32	Col-0	104596	pUBC-YFP-mod2	FALSE
col_4_teb_1_RB_4_104596_pUBC-YFP-mod2	wt	3	272	1	TRUE	3:9848640	reverse	3	9848640	RB	LZ156_13	0		4	CTGT	-2	Col-0	104596	pUBC-YFP-mod2	FALSE
col_4_teb_1_RB_4_104596_pUBC-YFP-mod2	wt	9	352	1	TRUE	3:10470255	forward	3	10470255	RB	LZ156_13	0		2	CT	-12	Col-0	104596	pUBC-YFP-mod2	FALSE
col_4_teb_1_RB_4_104596_pUBC-YFP-mod2	wt	3	164	1	TRUE	3:12915322	forward	3	12915322	RB	LZ156_13	0		5	GCAGT	-24	Col-0	104596	pUBC-YFP-mod2	FALSE
col_4_teb_1_RB_4_104596_pUBC-YFP-mod2	wt	3	144	1	TRUE	3:18491573	forward	3	18491573	RB	LZ156_13	0		3	TTG	-9	Col-0	104596	pUBC-YFP-mod2	FALSE
col_4_teb_1_RB_4_104596_pUBC-YFP-mod2	wt	6	194	0.833333	TRUE	3:21824768	forward	3	21824768	RB	LZ156_13	25	ACAAATTCCCGAAGTTTAGATCGAC	0		-29	Col-0	104596	pUBC-YFP-mod2	FALSE
col_4_teb_1_RB_4_104596_pUBC-YFP-mod2	wt	8	438	0.75	TRUE	3:22931675	reverse	3	22931675	RB	LZ156_13	0		2	AC	1	Col-0	104596	pUBC-YFP-mod2	FALSE
col_4_teb_1_RB_4_104596_pUBC-YFP-mod2	wt	4	281	1	TRUE	3:23208184	reverse	3	23208184	RB	LZ156_13	0		1	T	-2	Col-0	104596	pUBC-YFP-mod2	FALSE
col_4_teb_1_RB_4_104596_pUBC-YFP-mod2	wt	3	158	1	TRUE	3:23295389	reverse	3	23295389	RB	LZ156_13	0		1	G	-1	Col-0	104596	pUBC-YFP-mod2	FALSE
col_4_teb_1_RB_4_104596_pUBC-YFP-mod2	wt	5	334	1	TRUE	3:10870361	forward	3	10870361	RB	LZ156_13	0		1	A	0	Col-0	104596	pUBC-YFP-mod2	FALSE
col_4_teb_1_RB_4_104596_pUBC-YFP-mod2	wt	3	132	1	TRUE	3:9224042	reverse	3	9224042	RB	LZ156_13	32	AAATTATCGTCAAGGTCACCAGAACTGGCAGA	0		0	Col-0	104596	pUBC-YFP-mod2	FALSE
col_4_teb_1_RB_4_104596_pUBC-YFP-mod2	wt	5	267	1	TRUE	3:6393168	reverse	3	6393168	RB	LZ156_13	0		0		0	Col-0	104596	pUBC-YFP-mod2	FALSE
col_4_teb_1_RB_4_104596_pUBC-YFP-mod2	wt	4	196	1	TRUE	3:17592148	reverse	3	17592148	RB	LZ156_13	3	GAA	0		0	Col-0	104596	pUBC-YFP-mod2	FALSE
col_4_teb_1_RB_4_104596_pUBC-YFP-mod2	wt	14	278	1	TRUE	3:4622237	reverse	3	4622237	RB	LZ156_13	0		0		0	Col-0	104596	pUBC-YFP-mod2	FALSE
col_4_teb_1_RB_4_104596_pUBC-YFP-mod2	wt	4	175	1	TRUE	3:19906749	reverse	3	19906749	RB	LZ156_13	38	AAAAAGGCGATCTGATCCAGGTGCTTTATATATCCTGA	0		0	Col-0	104596	pUBC-YFP-mod2	FALSE
col_4_teb_1_RB_4_104596_pUBC-YFP-mod2	wt	11	370	0.909091	TRUE	3:18196882	reverse	3	18196882	RB	LZ156_13	30	AATCTCCGGGAGCCCACAATATATCCTGGG	0		0	Col-0	104596	pUBC-YFP-mod2	FALSE
col_4_teb_1_RB_4_104596_pUBC-YFP-mod2	wt	3	189	1	TRUE	3:4085373	reverse	3	4085373	RB	LZ156_13	6	TCACAT	0		0	Col-0	104596	pUBC-YFP-mod2	FALSE
col_4_teb_1_RB_4_104596_pUBC-YFP-mod2	wt	8	383	1	TRUE	3:21941388	reverse	3	21941388	RB	LZ156_13	2	AA	0		0	Col-0	104596	pUBC-YFP-mod2	FALSE
col_4_teb_1_RB_4_104596_pUBC-YFP-mod2	wt	3	110	1	TRUE	3:527072	reverse	3	527072	RB	LZ156_13	5	ATATA	0		0	Col-0	104596	pUBC-YFP-mod2	FALSE
col_4_teb_1_RB_4_104596_pUBC-YFP-mod2	wt	4	181	1	TRUE	3:23048859	forward	3	23048859	RB	LZ156_13	0		0		0	Col-0	104596	pUBC-YFP-mod2	FALSE
col_4_teb_1_RB_4_104596_pUBC-YFP-mod2	wt	9	230	0.888889	TRUE	3:4622217	forward	3	4622217	RB	LZ156_13	31	AAGCACCTGGATGAATCAATAAATATGTTAT	0		0	Col-0	104596	pUBC-YFP-mod2	FALSE
col_4_teb_1_RB_4_104596_pUBC-YFP-mod2	wt	3	323	1	TRUE	3:7473393	forward	3	7473393	RB	LZ156_13	8	AAGCACCT	0		0	Col-0	104596	pUBC-YFP-mod2	FALSE
col_4_teb_1_RB_4_104596_pUBC-YFP-mod2	wt	4	421	1	TRUE	3:1241043	reverse	3	1241043	RB	LZ156_13	9	TAAGATTCA	0		0	Col-0	104596	pUBC-YFP-mod2	FALSE
col_4_teb_1_RB_4_104596_pUBC-YFP-mod2	wt	4	257	0.75	TRUE	3:10790186	forward	3	10790186	RB	LZ156_13	31	GAACGCAGATGAGTCGGCGTTACTGGTTATC	0		-1	Col-0	104596	pUBC-YFP-mod2	FALSE
col_4_teb_1_RB_4_104596_pUBC-YFP-mod2	wt	4	109	1	TRUE	3:3707506	reverse	3	3707506	RB	LZ156_13	17	GCTGTTGAATAAACATT	0		-1	Col-0	104596	pUBC-YFP-mod2	FALSE
col_4_teb_1_RB_4_104596_pUBC-YFP-mod2	wt	7	204	0.857143	TRUE	3:6002301	reverse	3	6002301	RB	LZ156_13	7	ATTGAAG	0		-2	Col-0	104596	pUBC-YFP-mod2	FALSE
col_4_teb_1_RB_4_104596_pUBC-YFP-mod2	wt	3	146	1	TRUE	3:6459616	forward	3	6459616	RB	LZ156_13	34	AACGGTACACGGTCGGACAGGCCGCTGAGAGACA	0		-2	Col-0	104596	pUBC-YFP-mod2	FALSE
col_4_teb_1_RB_4_104596_pUBC-YFP-mod2	wt	3	236	1	TRUE	4:330388	reverse	4	330388	RB	LZ156_13	1	C	0		-3	Col-0	104596	pUBC-YFP-mod2	FALSE
col_4_teb_1_RB_4_104596_pUBC-YFP-mod2	wt	4	212	1	TRUE	4:979548	reverse	4	979548	RB	LZ156_13	0		4	GGAC	-5	Col-0	104596	pUBC-YFP-mod2	FALSE
col_4_teb_1_RB_4_104596_pUBC-YFP-mod2	wt	7	219	1	TRUE	4:5494857	forward	4	5494857	RB	LZ156_13	0		1	G	-34	Col-0	104596	pUBC-YFP-mod2	FALSE
col_4_teb_1_RB_4_104596_pUBC-YFP-mod2	wt	3	116	1	TRUE	4:7226276	reverse	4	7226276	RB	LZ156_13	4	CAAG	0		-11	Col-0	104596	pUBC-YFP-mod2	FALSE
col_4_teb_1_RB_4_104596_pUBC-YFP-mod2	wt	4	346	0.75	TRUE	4:8538333	forward	4	8538333	RB	LZ156_13	0		1	T	-2	Col-0	104596	pUBC-YFP-mod2	FALSE
col_4_teb_1_RB_4_104596_pUBC-YFP-mod2	wt	3	199	1	TRUE	4:10385427	reverse	4	10385427	RB	LZ156_13	0		4	TCTC	-37	Col-0	104596	pUBC-YFP-mod2	FALSE
col_4_teb_1_RB_4_104596_pUBC-YFP-mod2	wt	9	330	1	TRUE	4:13319222	reverse	4	13319222	RB	LZ156_13	0		0		-1	Col-0	104596	pUBC-YFP-mod2	FALSE
col_4_teb_1_RB_4_104596_pUBC-YFP-mod2	wt	3	354	1	TRUE	4:14101495	reverse	4	14101495	RB	LZ156_13	0		1	G	-1	Col-0	104596	pUBC-YFP-mod2	FALSE
col_4_teb_1_RB_4_104596_pUBC-YFP-mod2	wt	8	320	1	TRUE	4:14846796	reverse	4	14846796	RB	LZ156_13	9	AACCGACCG	0		-8	Col-0	104596	pUBC-YFP-mod2	FALSE
col_4_teb_1_RB_4_104596_pUBC-YFP-mod2	wt	4	545	1	TRUE	4:14998328	reverse	4	14998328	RB	LZ156_13	0		4	GTGA	0	Col-0	104596	pUBC-YFP-mod2	FALSE
col_4_teb_1_RB_4_104596_pUBC-YFP-mod2	wt	23	251	0.923077	TRUE	4:15883541	reverse	4	15883541	RB	LZ156_13	20	TGGTGCAACTGAACAATTCA	0		-35	Col-0	104596	pUBC-YFP-mod2	FALSE
col_4_teb_1_RB_4_104596_pUBC-YFP-mod2	wt	5	475	0.833333	TRUE	4:16458185	forward	4	16458185	RB	LZ156_13	20	GTTGGCTGGCTGGTGGTCGA	0		-12	Col-0	104596	pUBC-YFP-mod2	FALSE
col_4_teb_1_RB_4_104596_pUBC-YFP-mod2	wt	5	151	1	TRUE	4:16533001	forward	4	16533001	RB	LZ156_13	0		3	TGA	0	Col-0	104596	pUBC-YFP-mod2	FALSE
col_4_teb_1_RB_4_104596_pUBC-YFP-mod2	wt	4	286	1	TRUE	4:17597113	forward	4	17597113	RB	LZ156_13	0		4	CTGT	-2	Col-0	104596	pUBC-YFP-mod2	FALSE
col_4_teb_1_RB_4_104596_pUBC-YFP-mod2	wt	3	225	1	TRUE	4:9415465	reverse	4	9415465	RB	LZ156_13	0		3	ACA	2	Col-0	104596	pUBC-YFP-mod2	FALSE
col_4_teb_1_RB_4_104596_pUBC-YFP-mod2	wt	6	176	1	TRUE	4:8161060	reverse	4	8161060	RB	LZ156_13	0		3	ACA	2	Col-0	104596	pUBC-YFP-mod2	FALSE
col_4_teb_1_RB_4_104596_pUBC-YFP-mod2	wt	4	285	1	TRUE	4:18420368	forward	4	18420368	RB	LZ156_13	0		1	C	1	Col-0	104596	pUBC-YFP-mod2	FALSE
col_4_teb_1_RB_4_104596_pUBC-YFP-mod2	wt	15	367	0.933333	TRUE	4:18451548	forward	4	18451548	RB	LZ156_13	4	TATT	0		0	Col-0	104596	pUBC-YFP-mod2	FALSE
col_4_teb_1_RB_4_104596_pUBC-YFP-mod2	wt	4	338	1	TRUE	4:9244027	forward	4	9244027	RB	LZ156_13	0		1	A	0	Col-0	104596	pUBC-YFP-mod2	FALSE
col_4_teb_1_RB_4_104596_pUBC-YFP-mod2	wt	4	231	1	TRUE	4:18448466	reverse	4	18448466	RB	LZ156_13	20	AAAACCCTGTCCCAGGAAAA	0		0	Col-0	104596	pUBC-YFP-mod2	FALSE
col_4_teb_1_RB_4_104596_pUBC-YFP-mod2	wt	4	232	1	TRUE	4:2906972	forward	4	2906972	RB	LZ156_13	0		1	A	0	Col-0	104596	pUBC-YFP-mod2	FALSE
col_4_teb_1_RB_4_104596_pUBC-YFP-mod2	wt	8	280	0.875	TRUE	4:11567720	forward	4	11567720	RB	LZ156_13	0		0		0	Col-0	104596	pUBC-YFP-mod2	FALSE
col_4_teb_1_RB_4_104596_pUBC-YFP-mod2	wt	3	237	1	TRUE	4:7087132	forward	4	7087132	RB	LZ156_13	0		0		0	Col-0	104596	pUBC-YFP-mod2	FALSE
col_4_teb_1_RB_4_104596_pUBC-YFP-mod2	wt	3	234	1	TRUE	4:92409	reverse	4	92409	RB	LZ156_13	0		0		0	Col-0	104596	pUBC-YFP-mod2	FALSE
col_4_teb_1_RB_4_104596_pUBC-YFP-mod2	wt	3	390	1	TRUE	4:15965389	reverse	4	15965389	RB	LZ156_13	32	CAATAAGAACGCTTTGGGACTGTGCAATAAAG	0		-1	Col-0	104596	pUBC-YFP-mod2	FALSE
col_4_teb_1_RB_4_104596_pUBC-YFP-mod2	wt	3	150	1	TRUE	5:280388	reverse	5	280388	RB	LZ156_13	0		2	TT	-10	Col-0	104596	pUBC-YFP-mod2	FALSE
col_4_teb_1_RB_4_104596_pUBC-YFP-mod2	wt	26	482	0.884615	TRUE	5:423641	reverse	5	423641	RB	LZ156_13	0		2	GC	-13	Col-0	104596	pUBC-YFP-mod2	FALSE
col_4_teb_1_RB_4_104596_pUBC-YFP-mod2	wt	24	360	0.958333	TRUE	5:424395	forward	5	424395	RB	LZ156_13	0		1	A	-19	Col-0	104596	pUBC-YFP-mod2	FALSE
col_4_teb_1_RB_4_104596_pUBC-YFP-mod2	wt	7	333	0.857143	TRUE	5:880189	reverse	5	880189	RB	LZ156_13	52	CGTCATCCGATTTGTCCCACTTTTGCAATCATCATTCTACTACAAACAAACA	0		-27	Col-0	104596	pUBC-YFP-mod2	FALSE
col_4_teb_1_RB_4_104596_pUBC-YFP-mod2	wt	3	317	1	TRUE	5:2694323	reverse	5	2694323	RB	LZ156_13	8	CTGCATTA	0		-25	Col-0	104596	pUBC-YFP-mod2	FALSE
col_4_teb_1_RB_4_104596_pUBC-YFP-mod2	wt	4	163	1	TRUE	5:2838595	forward	5	2838595	RB	LZ156_13	0		2	GA	0	Col-0	104596	pUBC-YFP-mod2	FALSE
col_4_teb_1_RB_4_104596_pUBC-YFP-mod2	wt	4	174	0.75	TRUE	5:3241196	reverse	5	3241196	RB	LZ156_13	0		1	A	0	Col-0	104596	pUBC-YFP-mod2	FALSE
col_4_teb_1_RB_4_104596_pUBC-YFP-mod2	wt	3	234	1	TRUE	5:3539826	reverse	5	3539826	RB	LZ156_13	0		3	TGA	0	Col-0	104596	pUBC-YFP-mod2	FALSE
col_4_teb_1_RB_4_104596_pUBC-YFP-mod2	wt	5	237	1	TRUE	5:4255643	forward	5	4255643	RB	LZ156_13	0		2	TG	-1	Col-0	104596	pUBC-YFP-mod2	FALSE
col_4_teb_1_RB_4_104596_pUBC-YFP-mod2	wt	3	150	1	TRUE	5:5907621	forward	5	5907621	RB	LZ156_13	0		2	GA	0	Col-0	104596	pUBC-YFP-mod2	FALSE
col_4_teb_1_RB_4_104596_pUBC-YFP-mod2	wt	7	270	1	TRUE	5:5993507	reverse	5	5993507	RB	LZ156_13	0		2	GT	-24	Col-0	104596	pUBC-YFP-mod2	FALSE
col_4_teb_1_RB_4_104596_pUBC-YFP-mod2	wt	5	248	1	TRUE	5:6653876	reverse	5	6653876	RB	LZ156_13	29	GCAAAGTAGTAACAATATTTGCAAAGGGT	0		-32	Col-0	104596	pUBC-YFP-mod2	FALSE
col_4_teb_1_RB_4_104596_pUBC-YFP-mod2	wt	5	262	1	TRUE	5:7525319	reverse	5	7525319	RB	LZ156_13	0		2	TT	-11	Col-0	104596	pUBC-YFP-mod2	FALSE
col_4_teb_1_RB_4_104596_pUBC-YFP-mod2	wt	6	412	0.833333	TRUE	5:7681005	forward	5	7681005	RB	LZ156_13	0		4	GGGA	-6	Col-0	104596	pUBC-YFP-mod2	FALSE
col_4_teb_1_RB_4_104596_pUBC-YFP-mod2	wt	6	437	1	TRUE	5:7761601	forward	5	7761601	RB	LZ156_13	0		2	GG	-7	Col-0	104596	pUBC-YFP-mod2	FALSE
col_4_teb_1_RB_4_104596_pUBC-YFP-mod2	wt	9	255	1	TRUE	5:9209462	reverse	5	9209462	RB	LZ156_13	1	C	0		-24	Col-0	104596	pUBC-YFP-mod2	FALSE
col_4_teb_1_RB_4_104596_pUBC-YFP-mod2	wt	4	264	1	TRUE	5:9508228	forward	5	9508228	RB	LZ156_13	0		3	TGA	0	Col-0	104596	pUBC-YFP-mod2	FALSE
col_4_teb_1_RB_4_104596_pUBC-YFP-mod2	wt	3	218	1	TRUE	5:13910409	forward	5	13910409	RB	LZ156_13	0		6	ACTGTG	-1	Col-0	104596	pUBC-YFP-mod2	FALSE
col_4_teb_1_RB_4_104596_pUBC-YFP-mod2	wt	12	283	0.833333	TRUE	5:19395762	forward	5	19395762	RB	LZ156_13	11	CGTTCAAGCCT	0		-11	Col-0	104596	pUBC-YFP-mod2	FALSE
col_4_teb_1_RB_4_104596_pUBC-YFP-mod2	wt	13	340	0.846154	TRUE	5:19521434	reverse	5	19521434	RB	LZ156_13	0		1	G	-1	Col-0	104596	pUBC-YFP-mod2	FALSE
col_4_teb_1_RB_4_104596_pUBC-YFP-mod2	wt	5	244	0.8	TRUE	5:20086005	reverse	5	20086005	RB	LZ156_13	0		3	TGA	0	Col-0	104596	pUBC-YFP-mod2	FALSE
col_4_teb_1_RB_4_104596_pUBC-YFP-mod2	wt	4	179	0.75	TRUE	5:20384412	reverse	5	20384412	RB	LZ156_13	0		0		-1	Col-0	104596	pUBC-YFP-mod2	FALSE
col_4_teb_1_RB_4_104596_pUBC-YFP-mod2	wt	12	400	0.928571	TRUE	5:20905567	forward	5	20905567	RB	LZ156_13	0		0		-5	Col-0	104596	pUBC-YFP-mod2	FALSE
col_4_teb_1_RB_4_104596_pUBC-YFP-mod2	wt	5	274	1	TRUE	5:22182991	reverse	5	22182991	RB	LZ156_13	0		2	GA	0	Col-0	104596	pUBC-YFP-mod2	FALSE
[truncated: 4,404 more rows]
