# Supplementary material for: T-DNA integration in plants requires MRE11- or TDP2-mediated removal of the 5’ bound Agrobacterium protein VirD2
Source: Research Square preprint supplement (doi:10.21203/rs.3.rs-1144888/v1), 2021-12-09
Supplement: Supplementary file 3 [file 69cbfa4b90fda624d0a23c80.xlsx]

## Sheet: Data
Primer Name	Primer Sequence	Purpose
P5_#	AATGATACGGCGACCACCGAGATCTACAC[XXXXXXXX]NNWNNWNNACACTCTTTCCCTACACGACGCTCTTCCGATC*T	P5 Y adapter part 1 (generic), XXXXXXXX= 8bp barcode
MiSeq common adapter	Phos]GATCGGAAGAGC*C*A	P5 Y adapter part 2
P5_1	AATGATACGGCGACCACCGAGATCTA	TRANSGUIDE P5 primary
P5_2	AATGATACGGCGACCACCGAGATCTACAC	TRANSGUIDE P5 secondary
P7_#	CAAGCAGAAGACGGCATACGAGAT[XXXXXXXX]GTGACTGGAGTTCAGACGTGTGCTCTTCCGATC*T	P7 adapter primer (generic), XXXXXXXX= 8bp barcode
LZ002	CCGGCATGCAAGCTGATAATTC	TRANSGUIDE pUBC LB primary
LZ004	TCAGACGTGTGCTCTTCCGATCTGATAATTCAATTCGGCGTTA	TRANSGUIDE pUBC LB secondary
LZ006	GGCTAGAGCAGCTTGAGCTTGGA	TRANSGUIDE pUBC RB primary
LZ008	TCAGACGTGTGCTCTTCCGATCTCTTGAGCTTGGATCAGA	TRANSGUIDE pUBC RB secondary
LZ009	ACACATGAGCGAAACCCTAT	sanger seq primer, T35S
LZ010	GGCTGTTGTAGTTGTACTCC	sanger seq primer, YFP
LZ048	AACGGCGTGAGGATAAAGTC	junction validation
LZ050	TGTGAAGATCTCCCCTGACC	junction validation
LZ052	TAGGTACTACTTTTGCATGGGTGC	junction validation
LZ054	AGGCGGTTTGCGTATTGGCTA	TRANSGUIDE pCAS LB primary
LZ056	TCAGACGTGTGCTCTTCCGATCTCGGCGTTAATTCAGTACATT	TRANSGUIDE pCAS LB secondary
LZ058	GCGCAGCCTGAATGGCGAAT	TRANSGUIDE pCAS RB primary
LZ060	TCAGACGTGTGCTCTTCCGATCTATGAGCTTGAGCTTGGAT	TRANSGUIDE pCAS RB secondary
LZ070	TGCCGGTCTTGCGATGATTA	sanger seq primer, pUBC LB
LZ071	GTGGGTTACAACGAGGCTGA	junction validation
LZ073	CAAGAGCGAGACGAGGAAGTT	junction validation
LZ075	TGCCTGAGTACCGCTCCATC	junction validation
LZ081	GCCAATCTCGCAATGAACGGT	junction validation
LZ086	ATTGCTCAAGCTCATTCGCCATTC	junction validation
LZ123	GAGGCACAGGGCTTCAAGAG	Cloning pUBC-YFP-v2, LB, PCR1
LZ124	TAACGCCGAATTGAATTATCAGCTT	Cloning pUBC-YFP-v2, LB, PCR1
LZ125	GTTTACACCACAATATATCCTGCCA	Cloning pUBC-YFP-v2, LB, PCR2
LZ126	CTGCGCCTTATCCGGTAACT	Cloning pUBC-YFP-v2, LB, PCR2
LZ127	CTGATAATTCAATTCGGCGTTACTGTCTCTCAGCGGCCTGTCCGAACTGACCTTGATTCA	Cloning pUBC-YFP-v2, LB, PCR3
LZ128	CAGGATATATTGTGGTGTAAACCTCCTGAAAGCACCTGGATGAATCAAGGTCAGTTCGGA	Cloning pUBC-YFP-v2, LB, PCR3
LZ129	TGACCTCAATGCGCTGCTTA	Cloning pUBC-YFP-v2, RB, PCR1
LZ130	TGACAGGATATATTGGCGGGTA	Cloning pUBC-YFP-v2, RB, PCR1
LZ131	TCTGATCCAAGCTCAAGCTGC	Cloning pUBC-YFP-v2, RB, PCR2
LZ132	GGTCTTGTAGTTGCCGTCGT	Cloning pUBC-YFP-v2, RB, PCR2
LZ133	TACCCGCCAATATATCCTGTCACAGTCCCAAAGCGTTCTCCAAACTGCGTTACCTTGAGA	Cloning pUBC-YFP-v2, RB, PCR3
LZ134	AGCAGCTTGAGCTTGGATCAGATGCTGCTCAAGTCTAAAGTCTCAAGGTAACGCAGTTTG	Cloning pUBC-YFP-v2, RB, PCR3
LZ135	GATGCCCGAGGCATAGACTG	sanger seq primer, pWY82 backbone
LZ136	AAACCCACGTCATGCCAGTT	sanger seq primer, BlpR
LZ137	CCCCCGTTCGTAAATGGTGA	sanger seq primer, pWY82 backbone
LZ138	GATCCCGAGGGGAACCCTG	sanger seq primer, pWY82 backbone
LZ141	TGCCATTCTGCGTTTCGTTG	junction validation
LZ142	CCAATCAAACCACGACGCTTCA	junction validation
LZ144	TCAGTCCCTGAACAATCCTTGG	junction validation
LZ145	TAACAGCCTGAGTGGATGGC	junction validation
LZ146	TCCCCGATTCTCGTCTACAGT	junction validation
LZ147	TCGTTTCCCGCCTTCAGTTT	junction validation
LZ148	GCCATAACAGCTGGTTCTTGTA	junction validation
LZ149	ACTTGGAGCATCAACCACCCA	junction validation
LZ150	AAGTCAAATGGTAAGCAAGCAGGAG	junction validation
LZ151	TCAATCACATCACGCCACGTA	junction validation
LZ156	AGTGAGCCAACGACCAGGAG	junction validation
LZ158	TGGTACCTTGTTTTCGAAGCATCTG	junction validation
LZ159	GTGAACCACGCTACGAGTGAAC	junction validation
LZ164	ACAGGACATGATGTGGAGTATAGA	junction validation
LZ169	CCCAGCTTCTTCACAACACCA	junction validation
LZ170	CGCAGCCTGAATGGCGAATGC	TRANSGUIDE pWY82 LB primary
LZ171	TCAGACGTGTGCTCTTCCGATCTTCGGCGTTAATTCAGTACA	TRANSGUIDE pWY82 LB secondary
LZ172	GCAGCCCAAGCTCTCGGGAAAT	TRANSGUIDE pWY82 RB primary
LZ173	TCAGACGTGTGCTCTTCCGATCTTATTGGAGCTTGAGCTTGG	TRANSGUIDE pWY82 RB secondary
LZ177	GCTGATAATTCAATTCGGCGT	junction validation
LZ178	CAGGATTGGAGGCAATGCAAC	junction validation
LZ181	TCCACACAACATACGAGCCG	junction validation
LZ182	GAAGGCGGTTTTGATGTCCC	junction validation
LZ183	TAAAGCCTGGGGTGCCTAATG	junction validation
LZ184	CTGATAGATGCTCGCTGGGA	junction validation
LZ185	GGAATGGCCAAACCCTCACTA	junction validation
LZ188	CTAGGCGTGGTCAGGCTACT	junction validation
LZ189	CTGGGGTGCCTAATGAGTGA	junction validation
LZ190	ATAGCATCGCTGAGCGGGTA	junction validation
LZ191	GTGGCGAGTTGGTTGTAGTTG	junction validation
LZ192	TCCACACAACATACGAGCCG	junction validation
LZ193	GACGATTGCAGTGACAACGG	junction validation
LZ194	AAGTGTAAAGCCTGGGGTGC	junction validation
LZ195	CGACGTAAACGTGGCATGTG	junction validation
LZ196	CGCGTGTCTGTGAAACTGTG	junction validation
LZ197	ACGACTAGGTCACGAGAAAGC	junction validation
LZ198	CCGATTCAATCTGAACCCAGC	junction validation
LZ199	ACACGCAAAGTTGTTTTTGGC	junction validation
LZ200	ATTCAATCTGAACCCAGCTTCTTC	junction validation
LZ201	ATTGGCAAGCACTCAGTGGA	junction validation
