# Supplementary material for: T-DNA integration in plants requires MRE11- or TDP2-mediated removal of the 5’ bound Agrobacterium protein VirD2
Source: Research Square preprint supplement (doi:10.21203/rs.3.rs-1144888/v1), 2021-12-09
Supplement: Supplementary file 4 [file 70fdb49efbc3595ae2667ef3.xlsx]

## Sheet: Data
Junction	Genotype	Chr	Position	NrAnchorsIncludingPartial	DistanceToLBRB	LB.RB	isForward	getFractionHighestContributorToMinimumJunction	HomologyLength	FillerLength	MinimumJunctionConsensus	Found by sanger seq	Primer1	Primer2	Nested primer 1	Nested primer 2	Seq primer	Sanger Seq Consensus
1	wt	1	1689799	115	-48	LB	reverse	0.982759	4	0	GATAATTCAATTCGGCGTTAATtCaGTACATTAAAAACGTCCGCAATGTGGGCAAATCATGTAAGA	yes	LZ002	LZ048	-	-	LZ048	GGCGTTATTCAGTACATTAAAAACGTCCGCAATGTGGCAAATCATGTAAGATTCTCAGGATATAGAGATAGAGAGAGAGACTGTGACGAGTGACTGCATCTTCAGCTGTTTTATTTATTAATTTCGCTAAACTTCCAAAATTCTTTAGTAATATTAGTGATTACTTTTTCTTTTGAGTTTTGAAGCAACAAATTCTTAATTACTATGTCAATTATCTCCAGTTTAAAACTTTATATCCAGTTAAAGCTTCTTTTCTCTAATTTCTTTATATTTTTGTTGTCCAA
2	wt	1	330287	300	-21	LB	reverse	0.819079	3	0	GATAATTCAATTCGGCGTTAaTTcAGtacATtaaAAACgTCcgCaATGTgTTATtAaGtTGTcTaAGcgtcAaTtTGgtgagAAtaTcaaagga	yes	LZ002	LZ071	-	-	LZ071	TTCGGCGTTAATTCAGTACATTAAAAACGTCCGCAATGTGTTATTAAGTTGTCTAAGCGTCAATTTGGTGAGAATATCAAAGGAATGTTCAAGAGAAGACATTCGAAGTTTGGCTCATCGTACTCTCTCTTCAAGTCCCGTCTTCCGTTCTGAGATCCGTCGCCTCGGCATCCAGTTTTGACTTGTTTTATGTTTTGTATCATATAATCATCATCTCTCTCAACGAGATTCACACATCATCACCATCTGTATTCTATTTTATTCATTTTATAGTAACTATTTCATTTTTCTTTGCTTTTTCATTTACTCTTGATTATAAAAAGAATTACTAGATCACGTTGTGTGATTCATTCAACCTCGAAATAAAACAAAGAAAGATTGCTAAGACTTATTATGCAA…
3	wt	2	11764413	96	-20	LB	forward	0.948454	0	9	GATAATTCAATTCGGCGTTAaTTCAGTACATTAAAAACGTCCGCAATGTGtTATTAAGTTGTCTAAGCGTCAATTTGtGGACtGGGTTTGCTTTACCTGATTTGGTG	yes	LZ002	LZ073	-	-	LZ073	TCAATTCGGCGTTAATTCAGTACATTAAAAACGTCCGCAATGTGTTATTAAGTTGTCTAAGCGTCAATTTGTGGACTGGGTTTGCTTTACCTGATTTGGTGAAATGGGTTTGTTTTTGTTATATAGTAAGCTTCAGAGTGAGGCTGTTAGAGAAGCCATAACGACTATCAAGGGAAAATCTGAGGAGAAGAAGCGTAACTTTGTTGAGACAGTGGAGCTTCAGATTGGTCTGAAGAACTATGACCCACAAAAGGATAAGCGTTTCAGTGGATCTGTGAAGCTCCCACATATTCCTCGCCCAAAAATGAAGATCTGTATGCTTGGAGATGCTCAGCATGTTGAGGAGGTGATTGAAATCTCTATACTTTTTGTGTATCTTGTTTGGTTTGAATTGGTGAT…
4	wt	2	297127	3	0	LB	forward	1	3	0	GATAATTCAATTCGGCGTTAATTCAGTACATTAAAAACGTCCGCAATGTGTTATTAAGTTGTCTAAGCGTCAATTTGTTTACACCACAATATATCCTGGGTCAGTAGCTAAATAA	yes	LZ002	LZ151	-	-	LZ151	CTGATAATTCAATTCGGCGTTAATTCAGTACATTAAAAACGTCCGCAATGTGTTATTAAGTTGTCTAAGCGTCAATTTGTTTACACCACAATATATCCTGGGTCAGTAGCTAAATAAAACTATGTTTTCTTTAGATATTTTGTAACATATCTAGTGTTTTACTGATTGATATGAATTTATTGGGGACAACAGATGAATGTAACCGAAGCAAGAGAAGCTTGTAGAGATTGGTGGATGAAAGAAGCATTAGATGTTTTGGTTGAGAGACTTTCATCACCAATGAATCAACCAAAGGAAGAGAAGACTATGTCAATCTCTATTGAAACAATGTGCTGACGATGAAGCTGATGATTGCTAAATTGCTGATTGTTGATGGGAGTTTTTATGAGCTAATATGGA…
5	wt	2	7401374	9	0	LB	forward	0.888889	0	0	GATAATTCAATTCGGCGTTAATTCAGTACATTAAAAACGTCCGCAATGTGTTATTAAGTTGTCTAAGCGTCAATTTgTTTACACCACAATATATCCTGAACCGGAATTCGTTTTCAAC	yes	LZ002	LZ141	-	-	LZ141	ATTCAATTCGGCGTTAATTCAGTACATTAAAAACGTCCGCAATGTGTTATTAAGTTGTCTAAGCGTCAATTTGTTTACACCACAATATATCCTGAACCGGAATTCGTTTTCAACAATTCTAGTTTCTTGTCTATACAACAGTAATCAGAAAAAAGGGGAAAACTTTTAAACCACTAGATAGCGAAATCGAAAGAATCAATAAGAACACAAGAGAGTTTACAAGTTGGGTTTACCACCATGGATGGTCTGGATCAAAGCCGCCATTTTTAAACTGGTAACGAATTTGCCTCTGTTTTTCTTTGCCGTAAATCCTTATCCACCATCACTCATTATCCATTCGTTATGACTCATCCGAACACACTAGACCGCATCGCCGAATACCGGACTTCGGTTAAATAA…
6	wt	3	5639663	20	-12	LB	reverse	0.95	3	0	GATAATTCAATTCGGCGTTAATTCAGTACATTAAAAaCGTCCGCAATGTGTTATTAAGTTGTCTAAGCGTCAATTTGTTTACACCATAAACCGTGACCGGTAC	yes	LZ002	LZ144	-	-	LZ144	GATAATTCAATTCGGCGTTAATTCAGTACATTAAAAACGTCCGCAATGTGTTATTAAGTTGTCTAAGCGTCAATTTGTTTACACCATAAACCGTGACCGGTACAGCCTTAACCGGTGTTATTCATCAAAAACTCACCGATTGATTCGGTTTGGAAAAACAAAATTTACGTTTTTAAAACCGTTGATCGCATACATGAATGTTTTTGCCTACCTAAGGTTAATTAGTAAGTATACTAAGTAAATCAAACCGATGCATGAATAAAAATCTAGGACCAAATGACCGGTACGATTCTACAATACCAAGAGTCAATATATTAATACTAATTAAGAGGCTGAGTGGAAGAAAATATCACATCAATATCATATATCATATACGACTTATCAATAATAGAGAGAGTC…
7	wt	4	12655137	32	-9	LB	forward	0.96875	0	0	GATAATTCAATTCGGCGTTAATTCAGTACATTAAAAACGTCCGCAATGTGTTATTAAGTTGtCTAAGCGTCAATTTGTTTACACCACAAATTGGTTTTGGTTCGATAAC	yes	LZ002	LZ145	-	-	LZ145	ATTCAATTCGGCGTTAATTCAGTACATTAAAAACGTCCGCAATGTGTTATTAAGTTGTCTAAGCGTCAATTTGTTTACACCACAAATTGGTTTTGGTTCGATAACAAGTAACATGTAAACAACTTGATCTTTGTTCCTCTTGTTTTACCAATCAACTTTTAATTGAACTTTTGATGGCATACAACAACATACAAGGATTACAAAATTTACAACAAATGCAACAGTCTGGAACAGCAAGAAACCAAATCTCATATTTTATTTATTTATTGTCTCGCAAGTAAGTAACAGCATATAAAACCTATACTATACAAACAAAAACCAAAATAAAAATAAAAAAGCCTTCCATTCTTCCAGGTAAGGCTTCTCTCGTCTCATTGATTTTTCTAATTTAAAATCGAA…
8	wt	4	12655191	35	-25	LB	reverse	0.942857	4	0	GATAATTCAATTCGGCGTTAaTTCAGTACATTAAAAACGTCCGCAATGTGTTATTAAGTcGTCTAAGCGTCAACCCAAATTTGGTAAAT	yes	LZ002	LZ146	LZ177	LZ178	LZ201	CGTCCGCAATGTGTTATTAAGTCGTCTAAGCGTCAACCCAAATTTGGTAAATAAAGGTCATCAATAAGATTGCTAAGAAATATCACAACAACAAAGATCATCAAGATAACCTAAATTGCTTTGGGAATTTGATGATCGAAAGGTAAAGTAAACAAAAACTTGGCCTATGATCTAATTCCCAAGTTTCTTCTGGCCATCGAGCCATACAAGCTTTGGGACAACCTGGAGGACAAAAGAGCTGAATTCCTCCCCTGCAATTTCATTTCCTGCTATATCTAACTGTTTCAGATTCAAATCTGTTAACACGCAATACGCATCCCAGTACTTCGTAACCAATCCAGGATTCTGTTTTCCTACATCATCCTGACCCAA
9	wt	1	20140794	68	-13	RB	forward	0.957143	1	0	CTTGAGCTTGGATCAGATTGTCGTTTCCCGCCTTCAGTTTAAACcAcCgGacaTTcttcAtgG	yes	LZ006	LZ159	-	-	LZ159	CTTGAGCTTGGATCAGATTGTCGTTTCCCGCCTTCAGTTTAAACCACCGGACATTCTTCATGGTAAAGTCATGCATCTTTCTATAAATACTGTGGACAAAAACACAATGATCAACCTAGAGGTCGATAGCTCCAAAACCATCGACCTCAATATCGGCGAAAATCCAACCGGTGGATATAATGGGCCGGACTTTCGTCATGAAGTCATGTTTATTTTTATTAAGACTTTGACAGGAAGGAGAATCGTCTTAGAGGTGGAGAACTGCGACACTATTGAAAACATCAAGGCCAAAATTCAAGATAAACAAGGCATCCCGGTGGACCAACAGAGGCTGATTTTTAAAGGCAAGCAACTCG
10	wt	1	330247	279	0	RB	forward	0.960714	0	43	CTTGAGCTTGGATCAGATtGTCGTtTCCCGCCTTCAGTTTAAACtatcagtgtttgataccgcaatgtgttattaagttgtctaagcgtcaagttgtttacacctctgcccccaccaaac	yes	LZ006	LZ081	-	-	LZ081	TGAGCTTGGATCAGATTGTCGTTTCCCGCCTTCAGTTTAAACTATCAGTGTTTGATACCGCAATGTGTTATTAAGTTGTCTAAGCGTCAAGTTGTTTACACCTCTGCCCCCACCAAACAATCAAATGAACATGATGAACCACAACAAGGATCAAAAAGACCACAAAGACAAAGACAAGGA TCGCACTAACCATGCTGGGCCAAATGGCATAAAGCCAGCTCTATGTGTCGCCTGATTGGCGCAGCTTCATCGTTCGCATGTTGTACAATCCACGGAAGAGCTCCGTCTTCTATTAGTAGTGATCTTCCACTCTTCACACCTTCATACACTCTTCACATTATAAACCCACGCAAGAAAAAC CAATCTCTCTCTCTCTCTAAAGGCTGAATGACCTTGA…
11	wt	1	84901	3	0	RB	reverse	1	0	0	CTTGAGCTTGGATCAGATTGTCGTTTCCCGCCTTCAGTTTAAACTATCAGTGTTTGATCTTCTTCTTTTTTTGTTTG	yes	LZ006	LZ150	-	-	LZ150	GGCTAGAGCAGCTTGAGCTTGGATCAGATTGTCGTTTCCCGCCTTCAGTTTAAACTATCAGTGTTTGATCTTCTTCTTTTTTTGTTTGTGATTTTGTTTTTCCGTTTATAGGTTGTGATTTATGTTTGGGTCTTTGTGAGGCTTTAAATAGGCGTACGAACTATGAAGGTCTTAGCCAATTGCAAAACAGAGAATACTTGAAATTATAAATACTTTATTTCAAAGTCATCTGTTGGTGCTCATGGGTATATGCTAATAAGTTATGACATGTTTGGTACACTCAAATTACTATATCCCCTACATAGAATTTTAATCTAAATAAACACAAGTATTGAAGATTATACTTGCATATGTCCGATATATACGTCAGTTCTGAATAATTGTCTGCTATCGTCCCCT…
12	wt	2	13495941	65	0	RB	reverse	0.984848	2	0	CTTGAGCTTGGATCAGATTGTCGTTTcCCGCCTTCAGTTTAAACTATCAGTGTTTGAGACGAAAAACGAATCACA	yes	LZ006	LZ158	-	-	LZ158	CTTGAGCTTGGATCAGATTGTCGTTTCCCGCCTTCAGTTTAAACTATCAGTGTTTGAGACGAAAAACGAATCACATTGGTTATGACGTAACTAAAAGGATACATCATAAATGATTTAACATAGAGAATTTCATTTTGAAGACCATATTATTGATACCGATATATGCATAGCATCCTCTAAATGCTAATGAAACTCAGGTATCTAGACGATGAAAAAACAAAATAAAAAACAAAAAAAAACGATATGTCATTTTTCGTAGTTTGGACGTGCAGACTTGGCATGCAATACGGAAATCACCCGAACTTCCATCTACATTTTGGTAAAAAAAATAAAAAAAGTGTTACCTAATTTCTTTTTGCATTTTTTAGTTTTATTTTTGTAACTCGTTAAGTCATTATT…
13	wt	2	15253181	6	-1	RB	forward	1	0	0	CTTGAGCTTGGATCAGATTGTCGTTTCCCGCCTTCAGTTTAAACTATCAGTGTTTGCTCAATTTTATTTTTAATTA	no	LZ181	LZ182	LZ183	LZ184	LZ185	-
14	wt	2	7401421	9	-5	RB	reverse	0.8	0	61	CTTGAGCTTGGATCAGATTGTCGTTTCCCGCCTTCAGTTTAAACTATCAGTGCCAgCTGTCGTGCCaGCTGCAATGTGTTATTCTAATAAGTTGTCTAAGTGTTATTAAGTTGTCTTAAGTTCACATCTCGTG	yes	LZ006	LZ142	-	-	LZ142	CTTGAGCTTGGATCAGATTGTCGTTTCCCGCCTTCAGTTTAAACTATCAGTGCCAGCTGTCGTGCCAGCTGCAATGTGTTATTCTAATAAGTTGTCTAAGTGTTATTAAGTTGTCTTAAGTTCACATCTCGTGTTAAAGTACAATTTTTTATTCAGTTTCTCAGTGTAGCATTAGTTTCTCTAATTGATTGGAATTGAATTGGGCATTTTGGCATTAAACGTATGTAATTTAGCAATTGGTTCTCAGTTTCTGATTCAATTCATCGATATGGGTTGATTTCTTGGTCTGTACTTGGTTATTCATATTGAGCACTATACAATGCAGGTGTGGTTGTTACCAGAACCTTGACTCTTGTTTATCCTTCTACCTTTACGTCCAGACACAAAGCTCTGAACCAG…
15	wt	3	15015157	10	0	RB	reverse	1	1	0	CTTGAGCTTGGATCAGATTGTCGTTTCCCGCCTTCAGTTTAAACTATCAGTGTTTGAACAACAACACTTCTCTCAC	yes	LZ006	LZ156	-	-	LZ156	CTTGAGCTAGGATCAGATTGTCGTCTCCCGCCTTCCGTTTAAACTATCAGGGTTTGAACAACAACACTTCTCTCACTCAATCGCTTTCTCTTTGAGACGTTTGTTTAGTTTCAACAAACAAATCAAAACACACAAAGTTTGTGTCTTCCCTTAAGATTCACTCAAATCTCGCAACACACACATTCAACAAATCCTGATTCATAACATCTCACCAAATCTCTCAAAAGATCTCCAAATCTAAAATGTTCTTCTTCTTCTTCTTCATCTGAATCCAAAACAACAATGGTGAGACGTTTCCTCTCTTCTCACAAATCTCTCATCACTGTTTTCTGGATCGCCACTTTCGCTTCCTTATTCATCTGGCAATTCGGCGGCGTTTCCACAAATCTCTACTCCGGT…
16	wt	4	1138693	8	0	RB	reverse	0.875	0	0	CTTGAGCTTGGATCAGATTGTCGTTTCCCgcCTTCAGTTTAAACTATCAGTGTTTGAATTGTTGAATATGGTATTAT	yes	LZ086	LZ188	LZ189	LZ190	LZ191	CTTGAGCTTGGATCAGATTGTCGTTTCCCGCCTTCAGTTTAAACTATCAGTGTTTGAATTGTTGAATATGGTATTATAATCATAAACTGTGATTAGGCTCCCTATGACAAAACAAAAAGTGAAAAGAGACTAAATGCCAAAGAAAACAAAAGCATTTTGGACTTGTTTATTCTTTCCCACATTAAATAACTGATCTAATCAGATTGAAATTTGGTTGAAGGGTAGGTAATGGTGGGACCAGAATTAACACCAAAAATCCATCCAGAGAATTTGAAAGACATGATCTTTAGATCTCTAATCTTATGAACAAACAGATTAAACATATTGCATAGGGAGTAATAAGATAATTCACAAGAAAGAGAGTTCGAGTTTAAAACTGCAGAAGAGAGAAGAATATAC…
17	wt	5	251478	11	-17	RB	reverse	1	4	0	CTTGAGCTTGGATCAGATTGTCGTTTCCCGCCTTCAGTTTCGGTTAAACTCAGAAA	yes	LZ192	LZ193	LZ194	LZ195	LZ196	CTTGAGCTTGGATCAGATTGTCGTTTCCCGCCTTCAGTTTCGGTTAAACTCAGAAACTCTAATCGAGTTAGAAAACTCACGATCGAGTTTTGGAGCTTTGGTTAGGATTGAACTACACCAGTTATTGCAAACTCCGAAAAGAAATCAAGGTCCGCATAACCACGAACCAAACAAGACCGGAATTAAATCCCCAAAAGATTAAATGTTCCAATTTGGACCGGTCCACAGAAACACAAAACCAGGACCGGACCAAGCAAATAACAAAAGATAAAATTGGTCAACGAAAAGTCAGCTATAATCTCTGCTCTCCACAACAAATTAACAATGAAGCTAGAGGTGTGTG
18	wt	5	4898723	8	-1	RB	forward	1	0	34	CTTGAGCTTGGATCAGATTGTCGTTTCCCGCCTTCAGTTTAAACTATCAGTGTTTGTCTAAGTTGTCTAAACGTCCGCCACGTCATCACCATAAGAATGAGATATAAAAA	yes	LZ147	LZ148	-	-	LZ148	TCGTTTCCCGCCTTCAGTTTAAACTATCAGTGTTTGTCTAAGTTGTCTAAACGTCCGCCACGTCATCACCATAAGAATGAGATATAAAAACAGGGAAAAATAAGAAASGAGGATTATACCATTATCGATTACAAAACCAGGGGCCATTCTTTTGTTTCCTATGGGCTGTGTTTTTTTCAAACAGCGGATTCTTTTTTTATCCGTTTCGGTCTTCGCAAAGGGGCAAATTTGGAAACACATACACTTTATTAAAATATTATCATATGTTTTATCGGTTTACTCTAACCCGGTTGGTTATAAATAGCCGGTTTATTAGATTTGTTTTATTTACTTACACTGGCTGAATTACTATTTCACTCATAATTTGTCAATTTCATAGATTCATTTATATAAATTTGA…
19	wt	5	4898726	10	-7	RB	reverse	0.9	0	22	CTTGAGCTTGGATCAGATTGTCGTTTCCCGCCTTCAGTTTAAACTATCAgCGACATTAAAAACGTCCGCAATTTCTTAAATCCATTCCCAGA	yes	LZ006	LZ149	-	-	LZ149	GGCTAGAGCAGCTTGAGCTTGGATCAGATTGTCGTTTCCCGCCTTCAGTTTAAACTATCAGCGACATTAAAAACGTCCGCAATTTCTTAAATCCATTCCCAGATTCACACTTTTGATTTCGTGATACACTGTTACATTTTATTTTTTTTTGTTGGGTTTGGTGAGACTTTTATGGGGTTTGAGATGAAACCAGAGAAAGAGGTTTTGGAATTGATTTCTAGTAAGAATCAATGCAAGTCTAATCCCAATTCTGTGAAGAAGAAGAACAAAAACAAGAATAAGAAGATGATGATGACGTGGCGACGGAAGAAGATTGATTCCCCGGCGGATGGGATCACGGCGGTGCGGCGGTTGTTTAATACTTGCAAGGAAGTGTTCTCTAATGGTGGTCCTGGTGTT…
20	teb	2	1897502	4	-23	LB	reverse	1	4	0	GATAATTCAATTCGGCGTTAATTCAGTACATTAAAAACGTCCGCAATGTGTTATTAAGTTGTCTAAGCGTCAATTAAAGCCATTAAAAACA	yes	LZ002	LZ164	-	-	LZ164	GATAATTCAATTCGGCGTTAATTCAGTACATTAAAAACGTCCGCAATGTGTTATTAAGTTGTCTAAGCGTCAATTAAAGCCATTAAAAACATTATCGAGACATATCCGAAGGAAGTAGTATTGAATCAAGTATCTAGAACTAAACATTCTAGAGTAAACAAAATTTCTGAAGAGAGTAGTCACTGAATCAAGTATCTAATTTACTTCTTGTATAGTACATTAATAAGTGTATCTTGTTCTTTGCTAAAGGAACTCACTTACATTTCCAACAGTATAAATAGTATAGGCAAAACATCCAGTTATATATGTTAAAACAAGGAAACCAAACCCAACAAGTTTATAATCTGAAACAT
21	teb	2	1897477	4	0	RB	forward	1	0	0	CTTGAGCTTGGATCAGATTGTCGTTTCCCGCCTTCAGTTTAAACTATCAGTGTTTGAATGTCATTGCTAAATAACAG	yes	LZ197	LZ198	LZ199	LZ200	LZ169	GAGGCGGTTTGCGTATTGGCTAGAGCAGCTTGAGCTTGGATCAGATTGTCGTTTCCCGCCTTCAGTTTAAACTATCAGTGTTTGAATGTCATTGCTAAATAACAGTAATTAAAACAAATAAATATATGTATGTTCTA
22	teb	2	8375165	10	0	RB	forward	1	0	0	CTTGAGCTTGGATCAGATTGTCGTTTCCCGCCTTCAGTTTAAACTATCAGTGTTTGAATGTCTCTTTGGATTTGAAT	yes	LZ006	LZ075	-	-	LZ075	CTTGAGCTTGGATCAGATTGTCGTTTCCCGCCTTCAGTTTAAACTATCAGTGTTTGAATGTCTCTTTGGATTTGAATTAAAGTCCTAGTAATTATTGTTCAATTGAGTTCTCTTTGCCTCATTGTGCAAATTCTATAGTCAGAAGTCAAGAAAAGTTGAGATCTTTAAGTGGATTCGTGT GCCGGACTTCAATCTTCAGACAGACTTAACTTGTAGTAGAGGAACTAGGAGTTTGTAAAG TGAAAATATTCTCCTTTGGCTATGAATTGAGTTTTGATACTTAGTTATATGACGTACATT GTTTTGAATTTTGATCATCAAACTATATGTGAAATTGAAGAGAGGAATAAAGATTGTTGA TTCCTCTCAGCAATTGTCAGAGTATGTAACTGAGT…
23	mre11	3	15865825	48	-25	LB	reverse	0.979592	0	0	GATAATTCAATTCGGCGTTAATTCAGTACATTAAAAACGTCCGCAATGTGTTATTAAGTTGTCTAAGCGTCAACATCCATtTTAGACTTTTAC	yes	LZ002	LZ050	-	-	LZ050	GGCGTTATTCAGTACATTAAAAACGTCCGCAATGTGTATTAAGTTGTCTAAGCGTCAACATCCATTTTAGACTTTTACTTCTTCAAGAGACTCCATATTCAATAAGAAATTACTAATGTGTTTCAGCACTGTTACACTTCCTTCAGCATCTTTATTTGGTTATTCCGGGGATGATAAATGCTTTTGAAGGAAGAGATTATCATAGATTGCTTCTAACTTGATTAGTATGTTATCTTGATGACTGCTACCTTGCGCAGTGGAAACGTTAGACAGATTGGTTTGTG
24	mre11	1	25748758	4	0	RB	forward	0.8	0	0	CTTGAGCTTGGATCAGATTGTCGTTTCCCGCCTTCAGTTTAAACTAtCAGTGTTTGAGTTGTCTTCTTGCTTTTGGA	yes	LZ006	LZ052	-	-	LZ052	TGGATCAGATTGTCGTTTCCCGCCTTCAGTTTAAACTATCAGTGTTTGAGTTGTCTTCTTGCTTTTGGAATTTCCTTTCTTTACAATGAATCACCACCGATTACAATTATTATGTAAGTTTTTGGATGTATTTTGTAGTTTTACTTTTAATTTGTCTGGTTTCACCCAGTGGACAAGTTGTTGTACGATTACTCAATTGTTTACGTTTACTATATTGATATTTAGTCTCAGGTCCTATTGACAGAAATATCATTTTTAGATTCAGATTCTACTACGTCTCCTCGTGACTAT
