# Supplementary material for: T-DNA integration in plants requires MRE11- or TDP2-mediated removal of the 5’ bound Agrobacterium protein VirD2
Source: Research Square preprint supplement (doi:10.21203/rs.3.rs-1144888/v1), 2021-12-09
Supplement: Supplementary file 5 [file cffe7ad4e5169bd92d9cc205.xlsx]

## Sheet: Sheet1
Sample	Genotype	NrAnchorsIncludingPartial	tailSize	getFractionHighestContributorToMinimumJunction	isOK	IGVPos	isForward	Chr	RealPosition	LB.RB	DNA	FillerLength	Filler	HomologyLength	Homology	DistanceToLBRB	Ecotype	Run	Plasmid	duplicated_position
271_LB_104269_pCAS-PPO	ku70	8	197	1	TRUE	1:30981	reverse	1	30981	LB	271	14	GTGTTATGAATCGC	0		-24	Col-0	104269	pCAS-PPO	FALSE
271_LB_104269_pCAS-PPO	ku70	6	246	1	TRUE	1:443180	reverse	1	443180	LB	271	0		0		-28	Col-0	104269	pCAS-PPO	FALSE
271_LB_104269_pCAS-PPO	ku70	8	285	1	TRUE	1:814885	reverse	1	814885	LB	271	0		0		-25	Col-0	104269	pCAS-PPO	FALSE
271_LB_104269_pCAS-PPO	ku70	4	176	1	TRUE	1:814896	reverse	1	814896	LB	271	0		3	ACA	-10	Col-0	104269	pCAS-PPO	FALSE
271_LB_104269_pCAS-PPO	ku70	3	239	1	TRUE	1:1185688	reverse	1	1185688	LB	271	0		5	TGTTA	-45	Col-0	104269	pCAS-PPO	FALSE
271_LB_104269_pCAS-PPO	ku70	3	218	1	TRUE	1:1410922	reverse	1	1410922	LB	271	0		3	CGT	-28	Col-0	104269	pCAS-PPO	FALSE
271_LB_104269_pCAS-PPO	ku70	54	374	0.796296	TRUE	1:1497428	reverse	1	1497428	LB	271	26	ACAAGTTGTCTAAGCGTCAATTCAGT	0		-3	Col-0	104269	pCAS-PPO	FALSE
271_LB_104269_pCAS-PPO	ku70	5	277	1	TRUE	1:1738190	reverse	1	1738190	LB	271	8	GCCAATAC	0		-33	Col-0	104269	pCAS-PPO	FALSE
271_LB_104269_pCAS-PPO	ku70	3	151	1	TRUE	1:1999448	reverse	1	1999448	LB	271	0		4	TAAG	-31	Col-0	104269	pCAS-PPO	FALSE
271_LB_104269_pCAS-PPO	ku70	7	288	1	TRUE	1:3398883	forward	1	3398883	LB	271	0		1	A	-15	Col-0	104269	pCAS-PPO	FALSE
271_LB_104269_pCAS-PPO	ku70	3	304	1	TRUE	1:3723038	forward	1	3723038	LB	271	54	AAACAAATTGACGCTTAGACAACTTAATAACACATTGCGGACAAAGCAATGTGT	0		-49	Col-0	104269	pCAS-PPO	FALSE
271_LB_104269_pCAS-PPO	ku70	5	299	1	TRUE	1:6031984	forward	1	6031984	LB	271	16	CAAGCAGAAACCCAGC	0		-20	Col-0	104269	pCAS-PPO	FALSE
271_LB_104269_pCAS-PPO	ku70	3	150	1	TRUE	1:6267199	reverse	1	6267199	LB	271	0		9	AAGCGTCAA	-25	Col-0	104269	pCAS-PPO	FALSE
271_LB_104269_pCAS-PPO	ku70	3	210	1	TRUE	1:6935253	reverse	1	6935253	LB	271	0		4	AGCG	-29	Col-0	104269	pCAS-PPO	FALSE
271_LB_104269_pCAS-PPO	ku70	5	234	0.8	TRUE	1:8441772	forward	1	8441772	LB	271	0		3	TGT	-20	Col-0	104269	pCAS-PPO	FALSE
271_LB_104269_pCAS-PPO	ku70	31	287	1	TRUE	1:9316556	reverse	1	9316556	LB	271	0		0		-49	Col-0	104269	pCAS-PPO	FALSE
271_LB_104269_pCAS-PPO	ku70	6	334	1	TRUE	1:9889092	reverse	1	9889092	LB	271	0		3	ATT	-23	Col-0	104269	pCAS-PPO	FALSE
271_LB_104269_pCAS-PPO	ku70	3	151	1	TRUE	1:10386357	forward	1	10386357	LB	271	0		4	AAGC	-30	Col-0	104269	pCAS-PPO	FALSE
271_LB_104269_pCAS-PPO	ku70	8	411	0.875	TRUE	1:10806430	forward	1	10806430	LB	271	15	CCGAGAACCTTGAAC	0		-22	Col-0	104269	pCAS-PPO	FALSE
271_LB_104269_pCAS-PPO	ku70	11	427	1	TRUE	1:10806373	reverse	1	10806373	LB	271	0		5	CGTCC	-56	Col-0	104269	pCAS-PPO	FALSE
271_LB_104269_pCAS-PPO	ku70	22	378	0.962963	TRUE	1:11293245	reverse	1	11293245	LB	271	0		8	AGAGTCAA	-25	Col-0	104269	pCAS-PPO	FALSE
271_LB_104269_pCAS-PPO	ku70	7	277	1	TRUE	1:12734664	reverse	1	12734664	LB	271	0		4	ATGT	-49	Col-0	104269	pCAS-PPO	FALSE
271_LB_104269_pCAS-PPO	ku70	45	360	0.955556	TRUE	1:15981072	forward	1	15981072	LB	271	0		3	ACA	-15	Col-0	104269	pCAS-PPO	FALSE
271_LB_104269_pCAS-PPO	ku70	7	265	1	TRUE	1:19481429	reverse	1	19481429	LB	271	0		2	AT	-24	Col-0	104269	pCAS-PPO	FALSE
271_LB_104269_pCAS-PPO	ku70	38	301	0.926829	TRUE	1:20145217	reverse	1	20145217	LB	271	0		2	TT	-38	Col-0	104269	pCAS-PPO	FALSE
271_LB_104269_pCAS-PPO	ku70	3	155	1	TRUE	1:20195523	forward	1	20195523	LB	271	0		5	ATTTG	-21	Col-0	104269	pCAS-PPO	FALSE
271_LB_104269_pCAS-PPO	ku70	10	249	0.9	TRUE	1:20685913	forward	1	20685913	LB	271	13	GATTTATTCAACA	0		-27	Col-0	104269	pCAS-PPO	FALSE
271_LB_104269_pCAS-PPO	ku70	29	612	0.878788	TRUE	1:20883431	forward	1	20883431	LB	271	18	TAATTCGTTTGTTAGATA	0		-28	Col-0	104269	pCAS-PPO	FALSE
271_LB_104269_pCAS-PPO	ku70	12	284	0.833333	TRUE	1:22787537	forward	1	22787537	LB	271	0		4	ACAA	-9	Col-0	104269	pCAS-PPO	FALSE
271_LB_104269_pCAS-PPO	ku70	3	231	1	TRUE	1:23630911	forward	1	23630911	LB	271	0		4	ACAA	-9	Col-0	104269	pCAS-PPO	FALSE
271_LB_104269_pCAS-PPO	ku70	9	288	1	TRUE	1:24845871	forward	1	24845871	LB	271	0		5	CTAAG	-31	Col-0	104269	pCAS-PPO	FALSE
271_LB_104269_pCAS-PPO	ku70	7	324	1	TRUE	1:25233653	forward	1	25233653	LB	271	0		4	ATTT	-22	Col-0	104269	pCAS-PPO	FALSE
271_LB_104269_pCAS-PPO	ku70	5	244	1	TRUE	1:25233661	reverse	1	25233661	LB	271	0		2	CA	-12	Col-0	104269	pCAS-PPO	FALSE
271_LB_104269_pCAS-PPO	ku70	4	355	1	TRUE	1:26204326	reverse	1	26204326	LB	271	7	CGGCGTT	0		-23	Col-0	104269	pCAS-PPO	FALSE
271_LB_104269_pCAS-PPO	ku70	7	248	1	TRUE	1:26508762	reverse	1	26508762	LB	271	7	CTATTAA	0		-32	Col-0	104269	pCAS-PPO	FALSE
271_LB_104269_pCAS-PPO	ku70	8	219	0.875	TRUE	1:26919807	forward	1	26919807	LB	271	5	TAGGG	0		-41	Col-0	104269	pCAS-PPO	FALSE
271_LB_104269_pCAS-PPO	ku70	16	391	1	TRUE	1:26941980	forward	1	26941980	LB	271	0		5	CACCA	-12	Col-0	104269	pCAS-PPO	FALSE
271_LB_104269_pCAS-PPO	ku70	16	262	1	TRUE	1:26941970	forward	1	26941970	LB	271	8	ATTGACGC	0		-9	Col-0	104269	pCAS-PPO	FALSE
271_LB_104269_pCAS-PPO	ku70	7	335	0.909091	TRUE	1:27441865	forward	1	27441865	LB	271	1	G	0		-25	Col-0	104269	pCAS-PPO	FALSE
271_LB_104269_pCAS-PPO	ku70	23	309	0.956522	TRUE	1:27494792	reverse	1	27494792	LB	271	10	GTGCTGAAGT	0		-24	Col-0	104269	pCAS-PPO	FALSE
271_LB_104269_pCAS-PPO	ku70	3	134	1	TRUE	1:28365953	reverse	1	28365953	LB	271	5	ACATA	0		-31	Col-0	104269	pCAS-PPO	FALSE
271_LB_104269_pCAS-PPO	ku70	15	318	1	TRUE	1:29242968	forward	1	29242968	LB	271	0		4	ATTT	-22	Col-0	104269	pCAS-PPO	FALSE
271_LB_104269_pCAS-PPO	ku70	3	296	1	TRUE	1:30403349	forward	1	30403349	LB	271	0		5	AAGTT	-38	Col-0	104269	pCAS-PPO	FALSE
271_LB_104269_pCAS-PPO	ku70	44	399	0.931818	TRUE	1:6560841	reverse	1	6560841	LB	271	10	AATTAACGTC	0		0	Col-0	104269	pCAS-PPO	FALSE
271_LB_104269_pCAS-PPO	ku70	11	479	1	TRUE	1:7506597	reverse	1	7506597	LB	271	0		8	ATATCCTG	0	Col-0	104269	pCAS-PPO	FALSE
271_LB_104269_pCAS-PPO	ku70	6	174	0.833333	TRUE	1:3874473	forward	1	3874473	LB	271	12	TGATTTGTCTAA	0		0	Col-0	104269	pCAS-PPO	FALSE
271_LB_104269_pCAS-PPO	ku70	4	152	1	TRUE	1:8923391	reverse	1	8923391	LB	271	0		2	TG	0	Col-0	104269	pCAS-PPO	FALSE
271_LB_104269_pCAS-PPO	ku70	6	336	0.833333	TRUE	1:4070484	reverse	1	4070484	LB	271	0		0		0	Col-0	104269	pCAS-PPO	FALSE
271_LB_104269_pCAS-PPO	ku70	3	123	1	TRUE	1:3262321	reverse	1	3262321	LB	271	0		0		0	Col-0	104269	pCAS-PPO	FALSE
271_LB_104269_pCAS-PPO	ku70	3	331	1	TRUE	1:23648701	forward	1	23648701	LB	271	21	GATTCAAGGTATTCAAGGTAT	0		0	Col-0	104269	pCAS-PPO	FALSE
271_LB_104269_pCAS-PPO	ku70	3	308	1	TRUE	1:27915628	forward	1	27915628	LB	271	1	A	0		0	Col-0	104269	pCAS-PPO	FALSE
271_LB_104269_pCAS-PPO	ku70	3	156	1	TRUE	1:20578911	reverse	1	20578911	LB	271	11	AGTGAAAACGT	0		-2	Col-0	104269	pCAS-PPO	FALSE
271_LB_104269_pCAS-PPO	ku70	4	308	1	TRUE	1:10890536	reverse	1	10890536	LB	271	0		2	CC	-2	Col-0	104269	pCAS-PPO	FALSE
271_LB_104269_pCAS-PPO	ku70	4	317	0.75	TRUE	1:26972543	forward	1	26972543	LB	271	4	TGTT	0		-4	Col-0	104269	pCAS-PPO	FALSE
271_LB_104269_pCAS-PPO	ku70	13	476	1	TRUE	1:29809453	forward	1	29809453	LB	271	0		4	ATAT	-4	Col-0	104269	pCAS-PPO	FALSE
271_LB_104269_pCAS-PPO	ku70	7	178	0.857143	TRUE	1:22305761	reverse	1	22305761	LB	271	8	CTCATTTC	0		-5	Col-0	104269	pCAS-PPO	FALSE
271_LB_104269_pCAS-PPO	ku70	5	370	1	TRUE	1:1389271	reverse	1	1389271	LB	271	9	GGGATTAGG	0		-5	Col-0	104269	pCAS-PPO	FALSE
271_LB_104269_pCAS-PPO	ku70	4	390	1	TRUE	1:19250841	reverse	1	19250841	LB	271	18	GTATGTATTTTTATTTTT	0		-6	Col-0	104269	pCAS-PPO	FALSE
271_LB_104269_pCAS-PPO	ku70	4	268	1	TRUE	1:3398903	reverse	1	3398903	LB	271	29	TAATGGACGTCAAGTTGTCTAAACGTCCG	0		-6	Col-0	104269	pCAS-PPO	FALSE
271_LB_104269_pCAS-PPO	ku70	3	230	1	TRUE	1:25477365	forward	1	25477365	LB	271	7	CCATCTC	0		-6	Col-0	104269	pCAS-PPO	FALSE
271_LB_104269_pCAS-PPO	ku70	11	282	1	TRUE	1:12473415	reverse	1	12473415	LB	271	10	CCGATTATTC	0		-6	Col-0	104269	pCAS-PPO	FALSE
271_LB_104269_pCAS-PPO	ku70	3	123	1	TRUE	1:1630758	reverse	1	1630758	LB	271	0		0		-7	Col-0	104269	pCAS-PPO	FALSE
271_LB_104269_pCAS-PPO	ku70	6	442	1	TRUE	1:26507666	forward	1	26507666	LB	271	0		1	T	-8	Col-0	104269	pCAS-PPO	FALSE
271_LB_104269_pCAS-PPO	ku70	3	253	1	TRUE	1:6364262	forward	1	6364262	LB	271	0		2	AT	-8	Col-0	104269	pCAS-PPO	FALSE
271_LB_104269_pCAS-PPO	ku70	6	438	1	TRUE	1:10491956	forward	1	10491956	LB	271	0		2	AA	-9	Col-0	104269	pCAS-PPO	FALSE
271_LB_104269_pCAS-PPO	ku70	3	369	1	TRUE	1:3001474	reverse	1	3001474	LB	271	18	TTGCGAAGGAAATCTTAG	0		-10	Col-0	104269	pCAS-PPO	FALSE
271_LB_104269_pCAS-PPO	ku70	5	314	1	TRUE	1:10312039	forward	1	10312039	LB	271	0		1	A	-10	Col-0	104269	pCAS-PPO	FALSE
271_LB_104269_pCAS-PPO	ku70	17	323	0.941176	TRUE	1:27760036	reverse	1	27760036	LB	271	24	TTCCATGAAAGTTGTAGTTCAACG	0		-15	Col-0	104269	pCAS-PPO	FALSE
271_LB_104269_pCAS-PPO	ku70	17	323	0.941176	TRUE	2:455296	reverse	2	455296	LB	271	0		1	T	-38	Col-0	104269	pCAS-PPO	FALSE
271_LB_104269_pCAS-PPO	ku70	3	304	1	TRUE	2:525593	reverse	2	525593	LB	271	0		3	CAC	-14	Col-0	104269	pCAS-PPO	FALSE
271_LB_104269_pCAS-PPO	ku70	4	270	1	TRUE	2:640748	reverse	2	640748	LB	271	0		0		-32	Col-0	104269	pCAS-PPO	FALSE
271_LB_104269_pCAS-PPO	ku70	20	231	0.95	TRUE	2:645212	reverse	2	645212	LB	271	9	ACAACTTAA	0		-31	Col-0	104269	pCAS-PPO	FALSE
271_LB_104269_pCAS-PPO	ku70	5	268	1	TRUE	2:2640740	forward	2	2640740	LB	271	0		3	CAC	-14	Col-0	104269	pCAS-PPO	FALSE
271_LB_104269_pCAS-PPO	ku70	7	306	1	TRUE	2:4443108	forward	2	4443108	LB	271	0		1	T	-43	Col-0	104269	pCAS-PPO	FALSE
271_LB_104269_pCAS-PPO	ku70	4	112	1	TRUE	2:6985488	reverse	2	6985488	LB	271	0		2	TT	-19	Col-0	104269	pCAS-PPO	FALSE
271_LB_104269_pCAS-PPO	ku70	3	182	1	TRUE	2:7422210	reverse	2	7422210	LB	271	0		2	TG	-37	Col-0	104269	pCAS-PPO	FALSE
271_LB_104269_pCAS-PPO	ku70	14	300	0.857143	TRUE	2:9556105	forward	2	9556105	LB	271	0		4	CACC	-13	Col-0	104269	pCAS-PPO	FALSE
271_LB_104269_pCAS-PPO	ku70	4	306	1	TRUE	2:10826943	reverse	2	10826943	LB	271	0		2	TT	-23	Col-0	104269	pCAS-PPO	FALSE
271_LB_104269_pCAS-PPO	ku70	6	236	1	TRUE	2:12343756	reverse	2	12343756	LB	271	9	AATGATCAT	0		-49	Col-0	104269	pCAS-PPO	FALSE
271_LB_104269_pCAS-PPO	ku70	4	162	1	TRUE	2:14118920	forward	2	14118920	LB	271	1	A	0		-22	Col-0	104269	pCAS-PPO	FALSE
271_LB_104269_pCAS-PPO	ku70	34	343	0.911765	TRUE	2:14236230	forward	2	14236230	LB	271	0		3	ACA	-10	Col-0	104269	pCAS-PPO	FALSE
271_LB_104269_pCAS-PPO	ku70	4	197	1	TRUE	2:14418691	reverse	2	14418691	LB	271	0		3	CAA	-25	Col-0	104269	pCAS-PPO	FALSE
271_LB_104269_pCAS-PPO	ku70	9	348	0.888889	TRUE	2:14496746	reverse	2	14496746	LB	271	18	GCGTACATTAAAAACGTC	0		-29	Col-0	104269	pCAS-PPO	FALSE
271_LB_104269_pCAS-PPO	ku70	6	261	0.833333	TRUE	2:15741917	forward	2	15741917	LB	271	0		4	TAAG	-40	Col-0	104269	pCAS-PPO	FALSE
271_LB_104269_pCAS-PPO	ku70	6	208	1	TRUE	2:15818741	reverse	2	15818741	LB	271	45	CTGAACGTATTCTAAGAGATAAAAACTTTAGCTAGATCTCTATTC	0		-54	Col-0	104269	pCAS-PPO	FALSE
271_LB_104269_pCAS-PPO	ku70	4	136	1	TRUE	2:15922141	reverse	2	15922141	LB	271	0		2	GT	-20	Col-0	104269	pCAS-PPO	FALSE
271_LB_104269_pCAS-PPO	ku70	17	380	0.941176	TRUE	2:15960968	forward	2	15960968	LB	271	1	G	0		-29	Col-0	104269	pCAS-PPO	FALSE
271_LB_104269_pCAS-PPO	ku70	9	299	0.777778	TRUE	2:16142716	forward	2	16142716	LB	271	0		5	TTTAC	-16	Col-0	104269	pCAS-PPO	FALSE
271_LB_104269_pCAS-PPO	ku70	24	260	0.962963	TRUE	2:16187860	reverse	2	16187860	LB	271	0		3	GCA	-53	Col-0	104269	pCAS-PPO	FALSE
271_LB_104269_pCAS-PPO	ku70	11	314	0.818182	TRUE	2:16640837	reverse	2	16640837	LB	271	0		2	CA	-15	Col-0	104269	pCAS-PPO	FALSE
271_LB_104269_pCAS-PPO	ku70	6	346	1	TRUE	2:17167906	reverse	2	17167906	LB	271	0		3	TTA	-17	Col-0	104269	pCAS-PPO	FALSE
271_LB_104269_pCAS-PPO	ku70	24	307	0.958333	TRUE	2:17331526	reverse	2	17331526	LB	271	0		5	TCAAT	-24	Col-0	104269	pCAS-PPO	FALSE
271_LB_104269_pCAS-PPO	ku70	4	286	1	TRUE	2:17527956	forward	2	17527956	LB	271	0		2	TT	-22	Col-0	104269	pCAS-PPO	FALSE
271_LB_104269_pCAS-PPO	ku70	21	218	1	TRUE	2:17753022	forward	2	17753022	LB	271	0		3	ATT	-43	Col-0	104269	pCAS-PPO	FALSE
271_LB_104269_pCAS-PPO	ku70	10	263	1	TRUE	2:17993407	forward	2	17993407	LB	271	0		2	AC	-11	Col-0	104269	pCAS-PPO	FALSE
271_LB_104269_pCAS-PPO	ku70	3	91	1	TRUE	2:18451446	forward	2	18451446	LB	271	0		2	CC	-13	Col-0	104269	pCAS-PPO	FALSE
271_LB_104269_pCAS-PPO	ku70	5	343	1	TRUE	2:18527104	forward	2	18527104	LB	271	0		2	CA	-15	Col-0	104269	pCAS-PPO	FALSE
271_LB_104269_pCAS-PPO	ku70	3	223	1	TRUE	2:18717434	reverse	2	18717434	LB	271	0		4	GCGT	-28	Col-0	104269	pCAS-PPO	FALSE
271_LB_104269_pCAS-PPO	ku70	7	549	0.857143	TRUE	2:18833695	forward	2	18833695	LB	271	0		3	CAA	-25	Col-0	104269	pCAS-PPO	FALSE
271_LB_104269_pCAS-PPO	ku70	4	160	1	TRUE	2:19029041	forward	2	19029041	LB	271	15	TTGATACAAGATTGG	0		-31	Col-0	104269	pCAS-PPO	FALSE
271_LB_104269_pCAS-PPO	ku70	5	179	1	TRUE	2:19447900	forward	2	19447900	LB	271	0		4	TTAA	-41	Col-0	104269	pCAS-PPO	FALSE
271_LB_104269_pCAS-PPO	ku70	11	364	1	TRUE	2:12270118	reverse	2	12270118	LB	271	5	TTAAT	0		0	Col-0	104269	pCAS-PPO	FALSE
271_LB_104269_pCAS-PPO	ku70	4	193	0.75	TRUE	2:15076931	forward	2	15076931	LB	271	30	TACCTTAAAAATAAACCACGTATGTGGCAA	0		0	Col-0	104269	pCAS-PPO	FALSE
271_LB_104269_pCAS-PPO	ku70	4	221	1	TRUE	2:9733335	forward	2	9733335	LB	271	0		4	TCCT	-1	Col-0	104269	pCAS-PPO	FALSE
271_LB_104269_pCAS-PPO	ku70	12	304	1	TRUE	2:14246845	forward	2	14246845	LB	271	0		0		-1	Col-0	104269	pCAS-PPO	FALSE
271_LB_104269_pCAS-PPO	ku70	8	148	1	TRUE	2:19623149	forward	2	19623149	LB	271	8	ACTAGGTC	0		-2	Col-0	104269	pCAS-PPO	FALSE
271_LB_104269_pCAS-PPO	ku70	3	425	1	TRUE	2:8604689	forward	2	8604689	LB	271	8	GTCCGCAA	0		-3	Col-0	104269	pCAS-PPO	FALSE
271_LB_104269_pCAS-PPO	ku70	3	237	1	TRUE	2:10439393	forward	2	10439393	LB	271	13	ATTGGCGGTCACT	0		-4	Col-0	104269	pCAS-PPO	FALSE
271_LB_104269_pCAS-PPO	ku70	6	321	1	TRUE	2:16510213	forward	2	16510213	LB	271	0		3	TAT	-4	Col-0	104269	pCAS-PPO	FALSE
271_LB_104269_pCAS-PPO	ku70	14	277	0.933333	TRUE	2:15062855	reverse	2	15062855	LB	271	0		3	ATA	-5	Col-0	104269	pCAS-PPO	FALSE
271_LB_104269_pCAS-PPO	ku70	5	212	1	TRUE	2:14888122	forward	2	14888122	LB	271	7	AAAAATA	0		-5	Col-0	104269	pCAS-PPO	FALSE
271_LB_104269_pCAS-PPO	ku70	62	427	0.951613	TRUE	2:19498446	reverse	2	19498446	LB	271	0		1	T	-6	Col-0	104269	pCAS-PPO	FALSE
271_LB_104269_pCAS-PPO	ku70	10	172	1	TRUE	2:18701180	reverse	2	18701180	LB	271	1	G	0		-6	Col-0	104269	pCAS-PPO	FALSE
271_LB_104269_pCAS-PPO	ku70	6	237	0.833333	TRUE	2:8234091	reverse	2	8234091	LB	271	0		3	TAT	-6	Col-0	104269	pCAS-PPO	FALSE
271_LB_104269_pCAS-PPO	ku70	4	238	1	TRUE	2:2347869	forward	2	2347869	LB	271	10	CATGCATAAA	0		-7	Col-0	104269	pCAS-PPO	FALSE
271_LB_104269_pCAS-PPO	ku70	4	341	1	TRUE	2:19013770	forward	2	19013770	LB	271	0		3	AAT	-8	Col-0	104269	pCAS-PPO	FALSE
271_LB_104269_pCAS-PPO	ku70	8	275	1	TRUE	2:14234037	reverse	2	14234037	LB	271	15	TCAGTACATTAGACA	0		-8	Col-0	104269	pCAS-PPO	FALSE
271_LB_104269_pCAS-PPO	ku70	10	230	0.9	TRUE	2:8398349	forward	2	8398349	LB	271	6	ATGTGT	0		-9	Col-0	104269	pCAS-PPO	FALSE
271_LB_104269_pCAS-PPO	ku70	5	193	0.8	TRUE	2:17993419	reverse	2	17993419	LB	271	0		0		-9	Col-0	104269	pCAS-PPO	FALSE
271_LB_104269_pCAS-PPO	ku70	3	320	1	TRUE	2:18185677	forward	2	18185677	LB	271	11	TTATTGTTAAT	0		-10	Col-0	104269	pCAS-PPO	FALSE
271_LB_104269_pCAS-PPO	ku70	6	201	0.833333	TRUE	2:15171396	reverse	2	15171396	LB	271	49	ATTCGCAGCACTTCCATGACAACTCAAAACATCATAGCAATCATGGAAG	0		-25	Col-0	104269	pCAS-PPO	FALSE
271_LB_104269_pCAS-PPO	ku70	4	273	0.75	TRUE	3:185105	reverse	3	185105	LB	271	0		3	TTT	-22	Col-0	104269	pCAS-PPO	FALSE
271_LB_104269_pCAS-PPO	ku70	25	340	0.9	TRUE	3:336857	forward	3	336857	LB	271	44	CGTACCATTGAGCGTTTATTAGAATAATCGGATATTTAAAAGGA	0		-52	Col-0	104269	pCAS-PPO	FALSE
271_LB_104269_pCAS-PPO	ku70	12	355	1	TRUE	3:795146	forward	3	795146	LB	271	0		2	TC	-35	Col-0	104269	pCAS-PPO	FALSE
271_LB_104269_pCAS-PPO	ku70	10	237	1	TRUE	3:1192499	reverse	3	1192499	LB	271	0		7	TTTACAC	-14	Col-0	104269	pCAS-PPO	FALSE
271_LB_104269_pCAS-PPO	ku70	11	546	1	TRUE	3:1327390	reverse	3	1327390	LB	271	0		2	TC	-35	Col-0	104269	pCAS-PPO	FALSE
271_LB_104269_pCAS-PPO	ku70	12	265	1	TRUE	3:2690891	forward	3	2690891	LB	271	0		0		-46	Col-0	104269	pCAS-PPO	FALSE
271_LB_104269_pCAS-PPO	ku70	4	342	1	TRUE	3:3900385	reverse	3	3900385	LB	271	0		4	TATT	-43	Col-0	104269	pCAS-PPO	FALSE
271_LB_104269_pCAS-PPO	ku70	3	383	1	TRUE	3:4458552	reverse	3	4458552	LB	271	3	ATT	0		-30	Col-0	104269	pCAS-PPO	FALSE
271_LB_104269_pCAS-PPO	ku70	3	96	1	TRUE	3:4700213	reverse	3	4700213	LB	271	0		1	G	-21	Col-0	104269	pCAS-PPO	FALSE
271_LB_104269_pCAS-PPO	ku70	3	158	1	TRUE	3:4762972	reverse	3	4762972	LB	271	0		3	CGT	-28	Col-0	104269	pCAS-PPO	FALSE
271_LB_104269_pCAS-PPO	ku70	17	405	0.941176	TRUE	3:5342985	reverse	3	5342985	LB	271	1	C	0		-23	Col-0	104269	pCAS-PPO	FALSE
271_LB_104269_pCAS-PPO	ku70	6	257	1	TRUE	3:5663192	forward	3	5663192	LB	271	12	GAGCTTCTCATT	0		-45	Col-0	104269	pCAS-PPO	FALSE
271_LB_104269_pCAS-PPO	ku70	3	218	1	TRUE	3:8290602	reverse	3	8290602	LB	271	0		3	CCA	-12	Col-0	104269	pCAS-PPO	FALSE
271_LB_104269_pCAS-PPO	ku70	6	176	1	TRUE	3:9842374	forward	3	9842374	LB	271	0		7	TTTGTTT	-18	Col-0	104269	pCAS-PPO	FALSE
271_LB_104269_pCAS-PPO	ku70	8	262	1	TRUE	3:9844799	forward	3	9844799	LB	271	5	CGGGG	0		-29	Col-0	104269	pCAS-PPO	FALSE
271_LB_104269_pCAS-PPO	ku70	11	282	1	TRUE	3:10716336	reverse	3	10716336	LB	271	10	CTCTCTTCCA	0		-26	Col-0	104269	pCAS-PPO	FALSE
271_LB_104269_pCAS-PPO	ku70	3	132	1	TRUE	3:11775081	reverse	3	11775081	LB	271	0		3	ACA	-10	Col-0	104269	pCAS-PPO	FALSE
271_LB_104269_pCAS-PPO	ku70	15	227	1	TRUE	3:15699381	reverse	3	15699381	LB	271	1	C	0		-20	Col-0	104269	pCAS-PPO	FALSE
271_LB_104269_pCAS-PPO	ku70	3	168	1	TRUE	3:16489450	forward	3	16489450	LB	271	18	GTTTTAACCTATCAGGTA	0		-20	Col-0	104269	pCAS-PPO	FALSE
271_LB_104269_pCAS-PPO	ku70	13	245	0.88	TRUE	3:17379390	forward	3	17379390	LB	271	0		4	ACAA	-9	Col-0	104269	pCAS-PPO	FALSE
271_LB_104269_pCAS-PPO	ku70	3	192	1	TRUE	3:18006597	reverse	3	18006597	LB	271	0		3	TTG	-37	Col-0	104269	pCAS-PPO	FALSE
271_LB_104269_pCAS-PPO	ku70	11	252	1	TRUE	3:18094742	reverse	3	18094742	LB	271	8	GTTGTCTA	0		-25	Col-0	104269	pCAS-PPO	FALSE
271_LB_104269_pCAS-PPO	ku70	27	590	0.962963	TRUE	3:18239461	reverse	3	18239461	LB	271	0		4	ACCA	-12	Col-0	104269	pCAS-PPO	FALSE
271_LB_104269_pCAS-PPO	ku70	18	240	0.944444	TRUE	3:18548603	forward	3	18548603	LB	271	0		0		-31	Col-0	104269	pCAS-PPO	FALSE
271_LB_104269_pCAS-PPO	ku70	9	232	1	TRUE	3:18818934	reverse	3	18818934	LB	271	0		3	AAT	-24	Col-0	104269	pCAS-PPO	FALSE
271_LB_104269_pCAS-PPO	ku70	12	347	0.916667	TRUE	3:19230238	reverse	3	19230238	LB	271	0		1	T	-19	Col-0	104269	pCAS-PPO	FALSE
271_LB_104269_pCAS-PPO	ku70	8	239	1	TRUE	3:19445082	reverse	3	19445082	LB	271	0		6	ATGTGT	-47	Col-0	104269	pCAS-PPO	FALSE
271_LB_104269_pCAS-PPO	ku70	6	199	1	TRUE	3:19727588	forward	3	19727588	LB	271	0		3	TGT	-20	Col-0	104269	pCAS-PPO	FALSE
271_LB_104269_pCAS-PPO	ku70	4	194	1	TRUE	3:20500249	reverse	3	20500249	LB	271	3	TTG	0		-31	Col-0	104269	pCAS-PPO	FALSE
271_LB_104269_pCAS-PPO	ku70	3	170	1	TRUE	3:20681924	reverse	3	20681924	LB	271	0		4	TTTA	-17	Col-0	104269	pCAS-PPO	FALSE
271_LB_104269_pCAS-PPO	ku70	9	264	1	TRUE	3:21430136	reverse	3	21430136	LB	271	0		2	AT	-44	Col-0	104269	pCAS-PPO	FALSE
271_LB_104269_pCAS-PPO	ku70	6	186	0.833333	TRUE	3:21430145	reverse	3	21430145	LB	271	4	ACTT	0		-41	Col-0	104269	pCAS-PPO	FALSE
271_LB_104269_pCAS-PPO	ku70	4	253	0.75	TRUE	3:21871296	forward	3	21871296	LB	271	0		5	GCGTC	-27	Col-0	104269	pCAS-PPO	FALSE
271_LB_104269_pCAS-PPO	ku70	35	311	0.857143	TRUE	3:21935704	forward	3	21935704	LB	271	40	GAGCTTGATTCTCCAAAGCAAGCTCTTACCAAAGCAAGCT	0		-33	Col-0	104269	pCAS-PPO	FALSE
271_LB_104269_pCAS-PPO	ku70	3	326	1	TRUE	3:22069311	forward	3	22069311	LB	271	7	GTTGTCT	0		-25	Col-0	104269	pCAS-PPO	FALSE
271_LB_104269_pCAS-PPO	ku70	12	437	0.833333	TRUE	3:22910929	forward	3	22910929	LB	271	0		0		-17	Col-0	104269	pCAS-PPO	FALSE
271_LB_104269_pCAS-PPO	ku70	3	371	1	TRUE	3:22962477	forward	3	22962477	LB	271	0		0		-18	Col-0	104269	pCAS-PPO	FALSE
271_LB_104269_pCAS-PPO	ku70	7	401	1	TRUE	3:23037562	forward	3	23037562	LB	271	3	CCT	0		-56	Col-0	104269	pCAS-PPO	FALSE
271_LB_104269_pCAS-PPO	ku70	9	335	1	TRUE	3:14843387	reverse	3	14843387	LB	271	12	TTTCTCTACCGA	0		0	Col-0	104269	pCAS-PPO	FALSE
271_LB_104269_pCAS-PPO	ku70	8	287	0.875	TRUE	3:509364	reverse	3	509364	LB	271	19	ATGACCCAGGTTTCCCGCC	0		0	Col-0	104269	pCAS-PPO	FALSE
271_LB_104269_pCAS-PPO	ku70	13	242	0.9375	TRUE	3:8668617	reverse	3	8668617	LB	271	1	T	0		0	Col-0	104269	pCAS-PPO	FALSE
271_LB_104269_pCAS-PPO	ku70	6	256	0.833333	TRUE	3:677185	reverse	3	677185	LB	271	26	TAATCACCGTACCCAACTTAAAAACG	0		0	Col-0	104269	pCAS-PPO	FALSE
271_LB_104269_pCAS-PPO	ku70	3	287	1	TRUE	3:22639581	forward	3	22639581	LB	271	22	TTCTTGGAGGTAGCAGTTTAAA	0		0	Col-0	104269	pCAS-PPO	FALSE
271_LB_104269_pCAS-PPO	ku70	3	253	1	TRUE	3:2364545	reverse	3	2364545	LB	271	0		2	TG	0	Col-0	104269	pCAS-PPO	FALSE
271_LB_104269_pCAS-PPO	ku70	3	238	1	TRUE	3:2526077	reverse	3	2526077	LB	271	0		0		0	Col-0	104269	pCAS-PPO	FALSE
271_LB_104269_pCAS-PPO	ku70	3	260	1	TRUE	3:201757	forward	3	201757	LB	271	0		3	CCT	-1	Col-0	104269	pCAS-PPO	FALSE
271_LB_104269_pCAS-PPO	ku70	8	348	0.875	TRUE	3:16952648	reverse	3	16952648	LB	271	2	AC	0		-1	Col-0	104269	pCAS-PPO	FALSE
271_LB_104269_pCAS-PPO	ku70	3	226	1	TRUE	3:22432772	reverse	3	22432772	LB	271	0		0		-1	Col-0	104269	pCAS-PPO	FALSE
271_LB_104269_pCAS-PPO	ku70	4	192	1	TRUE	3:22417635	reverse	3	22417635	LB	271	0		5	ATATC	-3	Col-0	104269	pCAS-PPO	FALSE
271_LB_104269_pCAS-PPO	ku70	14	138	0.958333	TRUE	3:16519164	reverse	3	16519164	LB	271	0		2	AT	-4	Col-0	104269	pCAS-PPO	FALSE
271_LB_104269_pCAS-PPO	ku70	8	182	0.875	TRUE	3:10591907	forward	3	10591907	LB	271	0		2	TA	-5	Col-0	104269	pCAS-PPO	FALSE
271_LB_104269_pCAS-PPO	ku70	9	325	0.888889	TRUE	3:22155770	forward	3	22155770	LB	271	0		1	T	-6	Col-0	104269	pCAS-PPO	FALSE
271_LB_104269_pCAS-PPO	ku70	4	148	1	TRUE	3:179722	reverse	3	179722	LB	271	11	GATTGTACATT	0		-6	Col-0	104269	pCAS-PPO	FALSE
271_LB_104269_pCAS-PPO	ku70	6	126	1	TRUE	3:18373802	forward	3	18373802	LB	271	0		1	T	-6	Col-0	104269	pCAS-PPO	FALSE
271_LB_104269_pCAS-PPO	ku70	4	264	1	TRUE	3:20187899	forward	3	20187899	LB	271	0		1	T	-6	Col-0	104269	pCAS-PPO	FALSE
271_LB_104269_pCAS-PPO	ku70	6	182	1	TRUE	3:18238439	reverse	3	18238439	LB	271	0		3	ATA	-7	Col-0	104269	pCAS-PPO	FALSE
271_LB_104269_pCAS-PPO	ku70	3	351	1	TRUE	3:21430113	forward	3	21430113	LB	271	14	CAATCATCCCCCAT	0		-7	Col-0	104269	pCAS-PPO	FALSE
271_LB_104269_pCAS-PPO	ku70	4	293	1	TRUE	3:20890329	reverse	3	20890329	LB	271	3	ATT	0		-7	Col-0	104269	pCAS-PPO	FALSE
271_LB_104269_pCAS-PPO	ku70	3	196	1	TRUE	3:22910174	forward	3	22910174	LB	271	0		2	TA	-7	Col-0	104269	pCAS-PPO	FALSE
271_LB_104269_pCAS-PPO	ku70	10	241	0.9	TRUE	3:19406875	reverse	3	19406875	LB	271	0		1	A	-7	Col-0	104269	pCAS-PPO	FALSE
271_LB_104269_pCAS-PPO	ku70	8	456	1	TRUE	3:4406030	forward	3	4406030	LB	271	0		4	CAAT	-8	Col-0	104269	pCAS-PPO	FALSE
271_LB_104269_pCAS-PPO	ku70	4	158	1	TRUE	3:11533060	reverse	3	11533060	LB	271	0		5	ACAAT	-8	Col-0	104269	pCAS-PPO	FALSE
271_LB_104269_pCAS-PPO	ku70	5	210	1	TRUE	3:23061504	reverse	3	23061504	LB	271	13	GTGTTTATTAAGT	0		-8	Col-0	104269	pCAS-PPO	FALSE
271_LB_104269_pCAS-PPO	ku70	3	299	1	TRUE	3:4987183	reverse	3	4987183	LB	271	0		2	AT	-8	Col-0	104269	pCAS-PPO	FALSE
271_LB_104269_pCAS-PPO	ku70	19	358	0.947368	TRUE	3:4034697	forward	3	4034697	LB	271	6	ATTATT	0		-9	Col-0	104269	pCAS-PPO	FALSE
271_LB_104269_pCAS-PPO	ku70	11	302	0.909091	TRUE	3:19980414	reverse	3	19980414	LB	271	0		2	AA	-9	Col-0	104269	pCAS-PPO	FALSE
271_LB_104269_pCAS-PPO	ku70	22	352	0.954545	TRUE	3:22921506	reverse	3	22921506	LB	271	15	GGACGTTTTAAGCGT	0		-16	Col-0	104269	pCAS-PPO	FALSE
271_LB_104269_pCAS-PPO	ku70	3	275	1	TRUE	3:5781295	reverse	3	5781295	LB	271	34	TATAACGAACCGCTATGGTCAAAATAAGAATTCG	0		-17	Col-0	104269	pCAS-PPO	FALSE
271_LB_104269_pCAS-PPO	ku70	39	452	0.948718	TRUE	3:16519318	reverse	3	16519318	LB	271	21	GCCGAGCTGCCGGTCGTCACT	0		-20	Col-0	104269	pCAS-PPO	FALSE
271_LB_104269_pCAS-PPO	ku70	5	335	1	TRUE	4:160403	forward	4	160403	LB	271	4	ATCC	0		-48	Col-0	104269	pCAS-PPO	FALSE
271_LB_104269_pCAS-PPO	ku70	3	166	1	TRUE	4:386932	forward	4	386932	LB	271	0		2	GT	-47	Col-0	104269	pCAS-PPO	FALSE
271_LB_104269_pCAS-PPO	ku70	7	200	0.857143	TRUE	4:731426	forward	4	731426	LB	271	0		5	CGTCA	-26	Col-0	104269	pCAS-PPO	FALSE
271_LB_104269_pCAS-PPO	ku70	3	234	1	TRUE	4:731473	forward	4	731473	LB	271	0		1	C	-30	Col-0	104269	pCAS-PPO	FALSE
271_LB_104269_pCAS-PPO	ku70	9	501	1	TRUE	4:754881	reverse	4	754881	LB	271	0		2	CA	-15	Col-0	104269	pCAS-PPO	FALSE
271_LB_104269_pCAS-PPO	ku70	3	374	1	TRUE	4:763147	forward	4	763147	LB	271	0		4	TTTG	-21	Col-0	104269	pCAS-PPO	FALSE
271_LB_104269_pCAS-PPO	ku70	3	285	1	TRUE	4:793354	reverse	4	793354	LB	271	0		2	TC	-35	Col-0	104269	pCAS-PPO	FALSE
271_LB_104269_pCAS-PPO	ku70	15	425	0.933333	TRUE	4:808159	reverse	4	808159	LB	271	1	C	0		-20	Col-0	104269	pCAS-PPO	FALSE
271_LB_104269_pCAS-PPO	ku70	3	173	1	TRUE	4:4488302	forward	4	4488302	LB	271	0		3	TCT	-34	Col-0	104269	pCAS-PPO	FALSE
271_LB_104269_pCAS-PPO	ku70	6	160	1	TRUE	4:6829856	forward	4	6829856	LB	271	11	TTCTATAATAG	0		-22	Col-0	104269	pCAS-PPO	FALSE
271_LB_104269_pCAS-PPO	ku70	4	146	1	TRUE	4:7485813	reverse	4	7485813	LB	271	22	ACGCTTAGACAACTTAATAACA	0		-37	Col-0	104269	pCAS-PPO	FALSE
271_LB_104269_pCAS-PPO	ku70	3	128	1	TRUE	4:8757745	forward	4	8757745	LB	271	0		0		-20	Col-0	104269	pCAS-PPO	FALSE
271_LB_104269_pCAS-PPO	ku70	4	200	1	TRUE	4:9181560	reverse	4	9181560	LB	271	0		3	ATT	-43	Col-0	104269	pCAS-PPO	FALSE
271_LB_104269_pCAS-PPO	ku70	5	362	1	TRUE	4:9646655	forward	4	9646655	LB	271	0		4	GTCT	-34	Col-0	104269	pCAS-PPO	FALSE
271_LB_104269_pCAS-PPO	ku70	5	167	1	TRUE	4:10129170	forward	4	10129170	LB	271	2	GT	0		-13	Col-0	104269	pCAS-PPO	FALSE
271_LB_104269_pCAS-PPO	ku70	6	224	0.833333	TRUE	4:10271697	forward	4	10271697	LB	271	0		0		-8	Col-0	104269	pCAS-PPO	FALSE
271_LB_104269_pCAS-PPO	ku70	3	300	1	TRUE	4:10288216	reverse	4	10288216	LB	271	0		2	AT	-51	Col-0	104269	pCAS-PPO	FALSE
271_LB_104269_pCAS-PPO	ku70	12	395	0.923077	TRUE	4:10784173	forward	4	10784173	LB	271	0		2	TT	-23	Col-0	104269	pCAS-PPO	FALSE
271_LB_104269_pCAS-PPO	ku70	15	393	1	TRUE	4:10895198	forward	4	10895198	LB	271	0		6	TGTTTA	-17	Col-0	104269	pCAS-PPO	FALSE
271_LB_104269_pCAS-PPO	ku70	4	227	0.75	TRUE	4:11415108	forward	4	11415108	LB	271	0		0		-11	Col-0	104269	pCAS-PPO	FALSE
271_LB_104269_pCAS-PPO	ku70	18	432	0.944444	TRUE	4:12662408	forward	4	12662408	LB	271	1	C	0		-45	Col-0	104269	pCAS-PPO	FALSE
271_LB_104269_pCAS-PPO	ku70	5	308	1	TRUE	4:13273601	reverse	4	13273601	LB	271	0		4	AATT	-23	Col-0	104269	pCAS-PPO	FALSE
271_LB_104269_pCAS-PPO	ku70	9	193	1	TRUE	4:13444826	reverse	4	13444826	LB	271	6	GTGTTA	0		-24	Col-0	104269	pCAS-PPO	FALSE
271_LB_104269_pCAS-PPO	ku70	11	356	0.818182	TRUE	4:13832830	reverse	4	13832830	LB	271	0		6	CAATAT	-6	Col-0	104269	pCAS-PPO	FALSE
271_LB_104269_pCAS-PPO	ku70	4	204	1	TRUE	4:15102962	reverse	4	15102962	LB	271	0		5	GTCAA	-25	Col-0	104269	pCAS-PPO	FALSE
271_LB_104269_pCAS-PPO	ku70	4	174	1	TRUE	4:15247869	reverse	4	15247869	LB	271	19	CGTCGTTGCTCACATTTAC	0		-30	Col-0	104269	pCAS-PPO	FALSE
271_LB_104269_pCAS-PPO	ku70	11	260	1	TRUE	4:16533670	forward	4	16533670	LB	271	1	G	0		-36	Col-0	104269	pCAS-PPO	FALSE
271_LB_104269_pCAS-PPO	ku70	9	197	1	TRUE	4:16533669	reverse	4	16533669	LB	271	0		4	TAAG	-31	Col-0	104269	pCAS-PPO	FALSE
271_LB_104269_pCAS-PPO	ku70	3	403	1	TRUE	4:17479228	forward	4	17479228	LB	271	0		2	GT	-36	Col-0	104269	pCAS-PPO	FALSE
271_LB_104269_pCAS-PPO	ku70	6	300	1	TRUE	4:17743026	forward	4	17743026	LB	271	0		0		-50	Col-0	104269	pCAS-PPO	FALSE
271_LB_104269_pCAS-PPO	ku70	6	201	1	TRUE	4:17743080	reverse	4	17743080	LB	271	0		5	AATTT	-22	Col-0	104269	pCAS-PPO	FALSE
271_LB_104269_pCAS-PPO	ku70	6	356	0.888889	TRUE	4:17952037	forward	4	17952037	LB	271	6	GTAATG	0		-24	Col-0	104269	pCAS-PPO	FALSE
271_LB_104269_pCAS-PPO	ku70	20	390	0.9	TRUE	4:9194547	reverse	4	9194547	LB	271	9	ATAATGACA	0		0	Col-0	104269	pCAS-PPO	FALSE
271_LB_104269_pCAS-PPO	ku70	3	264	1	TRUE	4:10288197	forward	4	10288197	LB	271	0		0		0	Col-0	104269	pCAS-PPO	FALSE
271_LB_104269_pCAS-PPO	ku70	3	338	1	TRUE	4:1154072	reverse	4	1154072	LB	271	0		3	CTG	0	Col-0	104269	pCAS-PPO	FALSE
271_LB_104269_pCAS-PPO	ku70	13	379	0.846154	TRUE	4:6618619	reverse	4	6618619	LB	271	0		5	TATCC	-2	Col-0	104269	pCAS-PPO	FALSE
271_LB_104269_pCAS-PPO	ku70	10	372	0.9	TRUE	4:758441	forward	4	758441	LB	271	0		2	TC	-3	Col-0	104269	pCAS-PPO	FALSE
271_LB_104269_pCAS-PPO	ku70	5	200	1	TRUE	4:4418974	reverse	4	4418974	LB	271	6	TTGGTA	0		-3	Col-0	104269	pCAS-PPO	FALSE
271_LB_104269_pCAS-PPO	ku70	12	194	0.916667	TRUE	4:3026608	reverse	4	3026608	LB	271	23	TGTGGGAAAACCCTGGCGTTACC	0		-4	Col-0	104269	pCAS-PPO	FALSE
271_LB_104269_pCAS-PPO	ku70	23	381	0.923077	TRUE	4:560222	reverse	4	560222	LB	271	0		5	TATAT	-4	Col-0	104269	pCAS-PPO	FALSE
271_LB_104269_pCAS-PPO	ku70	4	288	1	TRUE	4:731621	forward	4	731621	LB	271	0		2	AT	-4	Col-0	104269	pCAS-PPO	FALSE
271_LB_104269_pCAS-PPO	ku70	3	143	1	TRUE	4:16407032	reverse	4	16407032	LB	271	24	TGTGGTATATATAATTTGATATGT	0		-4	Col-0	104269	pCAS-PPO	FALSE
271_LB_104269_pCAS-PPO	ku70	16	272	0.875	TRUE	4:732084	reverse	4	732084	LB	271	36	CCCTAACTCCTAATTTAAGTGGATCGGTCGAATTAG	0		-5	Col-0	104269	pCAS-PPO	FALSE
271_LB_104269_pCAS-PPO	ku70	6	273	1	TRUE	4:6064861	forward	4	6064861	LB	271	1	G	0		-6	Col-0	104269	pCAS-PPO	FALSE
271_LB_104269_pCAS-PPO	ku70	3	110	1	TRUE	4:15692787	forward	4	15692787	LB	271	0		3	TAT	-6	Col-0	104269	pCAS-PPO	FALSE
271_LB_104269_pCAS-PPO	ku70	8	269	1	TRUE	4:12072686	forward	4	12072686	LB	271	0		2	TA	-7	Col-0	104269	pCAS-PPO	FALSE
271_LB_104269_pCAS-PPO	ku70	11	241	1	TRUE	4:18036038	reverse	4	18036038	LB	271	13	GGAACAATATAAT	0		-8	Col-0	104269	pCAS-PPO	FALSE
271_LB_104269_pCAS-PPO	ku70	8	300	0.875	TRUE	4:15903402	forward	4	15903402	LB	271	1	A	0		-9	Col-0	104269	pCAS-PPO	FALSE
271_LB_104269_pCAS-PPO	ku70	5	185	1	TRUE	4:17793672	reverse	4	17793672	LB	271	0		3	CAA	-9	Col-0	104269	pCAS-PPO	FALSE
271_LB_104269_pCAS-PPO	ku70	4	348	0.75	TRUE	4:8869994	forward	4	8869994	LB	271	14	TGTGATGTGAGATC	0		-10	Col-0	104269	pCAS-PPO	FALSE
271_LB_104269_pCAS-PPO	ku70	4	305	1	TRUE	4:17980803	forward	4	17980803	LB	271	23	TTTATACTTGCGTCAATTCGGCA	0		-11	Col-0	104269	pCAS-PPO	FALSE
271_LB_104269_pCAS-PPO	ku70	3	180	1	TRUE	4:2763666	forward	4	2763666	LB	271	15	ACTCCTAGTTTCGTC	0		-15	Col-0	104269	pCAS-PPO	FALSE
271_LB_104269_pCAS-PPO	ku70	3	126	1	TRUE	5:155851	forward	5	155851	LB	271	12	CTAAGCAAAGCG	0		-20	Col-0	104269	pCAS-PPO	FALSE
271_LB_104269_pCAS-PPO	ku70	7	397	1	TRUE	5:223371	reverse	5	223371	LB	271	0		2	TT	-18	Col-0	104269	pCAS-PPO	FALSE
271_LB_104269_pCAS-PPO	ku70	15	348	1	TRUE	5:559483	reverse	5	559483	LB	271	0		2	TG	-21	Col-0	104269	pCAS-PPO	FALSE
271_LB_104269_pCAS-PPO	ku70	9	543	0.888889	TRUE	5:721493	forward	5	721493	LB	271	0		2	AC	-16	Col-0	104269	pCAS-PPO	FALSE
271_LB_104269_pCAS-PPO	ku70	8	361	1	TRUE	5:746354	forward	5	746354	LB	271	0		1	T	-49	Col-0	104269	pCAS-PPO	FALSE
271_LB_104269_pCAS-PPO	ku70	7	172	1	TRUE	5:2008709	forward	5	2008709	LB	271	0		4	TTGT	-20	Col-0	104269	pCAS-PPO	FALSE
271_LB_104269_pCAS-PPO	ku70	3	111	1	TRUE	5:2100139	reverse	5	2100139	LB	271	0		1	C	-30	Col-0	104269	pCAS-PPO	FALSE
271_LB_104269_pCAS-PPO	ku70	10	368	0.8	TRUE	5:2212393	forward	5	2212393	LB	271	0		2	TG	-21	Col-0	104269	pCAS-PPO	FALSE
271_LB_104269_pCAS-PPO	ku70	3	215	1	TRUE	5:2212414	reverse	5	2212414	LB	271	0		5	CCACA	-10	Col-0	104269	pCAS-PPO	FALSE
271_LB_104269_pCAS-PPO	ku70	3	169	1	TRUE	5:2651255	forward	5	2651255	LB	271	0		0		-32	Col-0	104269	pCAS-PPO	FALSE
271_LB_104269_pCAS-PPO	ku70	6	241	1	TRUE	5:3178829	reverse	5	3178829	LB	271	4	CCTA	0		-23	Col-0	104269	pCAS-PPO	FALSE
271_LB_104269_pCAS-PPO	ku70	12	295	0.916667	TRUE	5:3191206	reverse	5	3191206	LB	271	0		4	ACAA	-9	Col-0	104269	pCAS-PPO	FALSE
271_LB_104269_pCAS-PPO	ku70	3	135	1	TRUE	5:3273239	forward	5	3273239	LB	271	2	CT	0		-20	Col-0	104269	pCAS-PPO	FALSE
271_LB_104269_pCAS-PPO	ku70	27	396	1	TRUE	5:3694717	forward	5	3694717	LB	271	10	GAGCTTGAGC	0		-24	Col-0	104269	pCAS-PPO	FALSE
271_LB_104269_pCAS-PPO	ku70	27	367	0.896552	TRUE	5:4276468	forward	5	4276468	LB	271	0		5	CTAAG	-31	Col-0	104269	pCAS-PPO	FALSE
271_LB_104269_pCAS-PPO	ku70	6	393	1	TRUE	5:4603030	reverse	5	4603030	LB	271	0		4	TGTT	-46	Col-0	104269	pCAS-PPO	FALSE
271_LB_104269_pCAS-PPO	ku70	13	183	1	TRUE	5:6421967	reverse	5	6421967	LB	271	0		0		-42	Col-0	104269	pCAS-PPO	FALSE
271_LB_104269_pCAS-PPO	ku70	62	496	1	TRUE	5:6458835	forward	5	6458835	LB	271	0		1	G	-31	Col-0	104269	pCAS-PPO	FALSE
271_LB_104269_pCAS-PPO	ku70	14	428	0.928571	TRUE	5:6549572	reverse	5	6549572	LB	271	1	A	0		-20	Col-0	104269	pCAS-PPO	FALSE
271_LB_104269_pCAS-PPO	ku70	3	257	1	TRUE	5:6747473	forward	5	6747473	LB	271	0		2	GT	-20	Col-0	104269	pCAS-PPO	FALSE
271_LB_104269_pCAS-PPO	ku70	4	187	1	TRUE	5:8538924	reverse	5	8538924	LB	271	3	TAA	0		-28	Col-0	104269	pCAS-PPO	FALSE
271_LB_104269_pCAS-PPO	ku70	13	200	0.923077	TRUE	5:9410527	reverse	5	9410527	LB	271	0		3	ACC	-13	Col-0	104269	pCAS-PPO	FALSE
271_LB_104269_pCAS-PPO	ku70	3	381	1	TRUE	5:12362389	forward	5	12362389	LB	271	0		5	AGTTG	-37	Col-0	104269	pCAS-PPO	FALSE
271_LB_104269_pCAS-PPO	ku70	3	318	1	TRUE	5:15261287	reverse	5	15261287	LB	271	1	A	0		-37	Col-0	104269	pCAS-PPO	FALSE
271_LB_104269_pCAS-PPO	ku70	4	200	1	TRUE	5:15916727	reverse	5	15916727	LB	271	0		5	CACAA	-9	Col-0	104269	pCAS-PPO	FALSE
271_LB_104269_pCAS-PPO	ku70	6	200	1	TRUE	5:16646072	forward	5	16646072	LB	271	0		6	TTGTTT	-18	Col-0	104269	pCAS-PPO	FALSE
271_LB_104269_pCAS-PPO	ku70	6	241	1	TRUE	5:17009356	forward	5	17009356	LB	271	19	CATGAAAGCCGACTGCACA	0		-47	Col-0	104269	pCAS-PPO	FALSE
271_LB_104269_pCAS-PPO	ku70	3	175	1	TRUE	5:17450435	reverse	5	17450435	LB	271	0		1	C	-27	Col-0	104269	pCAS-PPO	FALSE
271_LB_104269_pCAS-PPO	ku70	22	250	0.869565	TRUE	5:17942593	forward	5	17942593	LB	271	13	ACATTAAATACTT	0		-28	Col-0	104269	pCAS-PPO	FALSE
271_LB_104269_pCAS-PPO	ku70	8	267	1	TRUE	5:18009832	reverse	5	18009832	LB	271	0		3	GTT	-38	Col-0	104269	pCAS-PPO	FALSE
271_LB_104269_pCAS-PPO	ku70	3	281	1	TRUE	5:20276799	forward	5	20276799	LB	271	0		2	TG	-21	Col-0	104269	pCAS-PPO	FALSE
271_LB_104269_pCAS-PPO	ku70	20	434	1	TRUE	5:20744889	reverse	5	20744889	LB	271	0		4	TTTA	-17	Col-0	104269	pCAS-PPO	FALSE
271_LB_104269_pCAS-PPO	ku70	14	260	0.8	TRUE	5:22084021	forward	5	22084021	LB	271	2	TT	0		-31	Col-0	104269	pCAS-PPO	FALSE
271_LB_104269_pCAS-PPO	ku70	5	318	0.8	TRUE	5:22551789	forward	5	22551789	LB	271	0		2	CG	-29	Col-0	104269	pCAS-PPO	FALSE
271_LB_104269_pCAS-PPO	ku70	7	199	0.857143	TRUE	5:22657872	forward	5	22657872	LB	271	0		3	AAT	-8	Col-0	104269	pCAS-PPO	FALSE
271_LB_104269_pCAS-PPO	ku70	3	318	1	TRUE	5:22725380	forward	5	22725380	LB	271	0		7	GTTGTCT	-34	Col-0	104269	pCAS-PPO	FALSE
271_LB_104269_pCAS-PPO	ku70	3	303	1	TRUE	5:22892709	forward	5	22892709	LB	271	0		5	TTTGT	-20	Col-0	104269	pCAS-PPO	FALSE
271_LB_104269_pCAS-PPO	ku70	5	201	1	TRUE	5:23187406	reverse	5	23187406	LB	271	0		2	TA	-17	Col-0	104269	pCAS-PPO	FALSE
271_LB_104269_pCAS-PPO	ku70	3	268	1	TRUE	5:23350660	forward	5	23350660	LB	271	0		1	G	-21	Col-0	104269	pCAS-PPO	FALSE
271_LB_104269_pCAS-PPO	ku70	5	211	0.8	TRUE	5:23466627	reverse	5	23466627	LB	271	8	ACGTCCGC	0		-32	Col-0	104269	pCAS-PPO	FALSE
271_LB_104269_pCAS-PPO	ku70	4	159	1	TRUE	5:24285100	reverse	5	24285100	LB	271	30	AGTAATTTGGTACACATAACAGAGTAAGCC	0		-31	Col-0	104269	pCAS-PPO	FALSE
271_LB_104269_pCAS-PPO	ku70	4	199	1	TRUE	5:24357075	reverse	5	24357075	LB	271	0		2	TC	-35	Col-0	104269	pCAS-PPO	FALSE
271_LB_104269_pCAS-PPO	ku70	9	263	1	TRUE	5:24515014	forward	5	24515014	LB	271	0		1	T	-24	Col-0	104269	pCAS-PPO	FALSE
271_LB_104269_pCAS-PPO	ku70	17	310	1	TRUE	5:24777405	forward	5	24777405	LB	271	0		7	TTAAGTT	-38	Col-0	104269	pCAS-PPO	FALSE
271_LB_104269_pCAS-PPO	ku70	4	265	1	TRUE	5:24841179	reverse	5	24841179	LB	271	0		1	A	-15	Col-0	104269	pCAS-PPO	FALSE
271_LB_104269_pCAS-PPO	ku70	15	245	1	TRUE	5:25399758	forward	5	25399758	LB	271	23	CTAATTCAGTACATTAAAAACTG	0		-43	Col-0	104269	pCAS-PPO	FALSE
271_LB_104269_pCAS-PPO	ku70	13	243	1	TRUE	5:25399784	reverse	5	25399784	LB	271	0		3	GTT	-19	Col-0	104269	pCAS-PPO	FALSE
271_LB_104269_pCAS-PPO	ku70	46	327	1	TRUE	5:25425849	reverse	5	25425849	LB	271	0		5	GCAAT	-51	Col-0	104269	pCAS-PPO	FALSE
271_LB_104269_pCAS-PPO	ku70	20	310	0.9	TRUE	5:25533788	forward	5	25533788	LB	271	0		2	TT	-22	Col-0	104269	pCAS-PPO	FALSE
271_LB_104269_pCAS-PPO	ku70	11	375	1	TRUE	5:25711188	forward	5	25711188	LB	271	0		3	AAG	-40	Col-0	104269	pCAS-PPO	FALSE
271_LB_104269_pCAS-PPO	ku70	9	255	0.888889	TRUE	5:25843093	forward	5	25843093	LB	271	19	ATTGTGGTGTAAACAAATT	0		-51	Col-0	104269	pCAS-PPO	FALSE
271_LB_104269_pCAS-PPO	ku70	24	357	0.916667	TRUE	5:25892643	forward	5	25892643	LB	271	0		2	TT	-23	Col-0	104269	pCAS-PPO	FALSE
271_LB_104269_pCAS-PPO	ku70	4	243	1	TRUE	5:25986500	forward	5	25986500	LB	271	34	TTTGTCTGCAATAACGCCGAATAATTAAAAACGT	0		-46	Col-0	104269	pCAS-PPO	FALSE
271_LB_104269_pCAS-PPO	ku70	3	162	1	TRUE	5:26118311	reverse	5	26118311	LB	271	3	TCT	0		-34	Col-0	104269	pCAS-PPO	FALSE
271_LB_104269_pCAS-PPO	ku70	9	374	1	TRUE	5:26353935	forward	5	26353935	LB	271	0		3	TCA	-26	Col-0	104269	pCAS-PPO	FALSE
271_LB_104269_pCAS-PPO	ku70	3	143	1	TRUE	5:8519639	reverse	5	8519639	LB	271	0		4	CTGC	1	Col-0	104269	pCAS-PPO	FALSE
271_LB_104269_pCAS-PPO	ku70	4	264	1	TRUE	5:24885929	reverse	5	24885929	LB	271	1	A	0		1	Col-0	104269	pCAS-PPO	FALSE
271_LB_104269_pCAS-PPO	ku70	14	277	0.857143	TRUE	5:21610041	reverse	5	21610041	LB	271	0		0		0	Col-0	104269	pCAS-PPO	FALSE
271_LB_104269_pCAS-PPO	ku70	8	358	0.875	TRUE	5:17453519	reverse	5	17453519	LB	271	0		0		0	Col-0	104269	pCAS-PPO	FALSE
271_LB_104269_pCAS-PPO	ku70	12	290	0.916667	TRUE	5:6451467	forward	5	6451467	LB	271	19	TGACATAAATAAAAACAGG	0		0	Col-0	104269	pCAS-PPO	FALSE
271_LB_104269_pCAS-PPO	ku70	16	350	0.9375	TRUE	5:19099994	forward	5	19099994	LB	271	0		4	CCTG	0	Col-0	104269	pCAS-PPO	FALSE
271_LB_104269_pCAS-PPO	ku70	15	223	0.933333	TRUE	5:3561955	forward	5	3561955	LB	271	28	TTGATAGCTCGTAAGCTCAAAGCTGCTA	0		0	Col-0	104269	pCAS-PPO	FALSE
271_LB_104269_pCAS-PPO	ku70	10	254	1	TRUE	5:21961613	forward	5	21961613	LB	271	5	TTGTC	0		0	Col-0	104269	pCAS-PPO	FALSE
271_LB_104269_pCAS-PPO	ku70	17	302	0.941176	TRUE	5:1478492	reverse	5	1478492	LB	271	5	TTAAG	0		0	Col-0	104269	pCAS-PPO	FALSE
271_LB_104269_pCAS-PPO	ku70	5	237	0.875	TRUE	5:559413	forward	5	559413	LB	271	0		3	CTG	0	Col-0	104269	pCAS-PPO	FALSE
271_LB_104269_pCAS-PPO	ku70	16	258	0.875	TRUE	5:6549552	forward	5	6549552	LB	271	4	AAGG	0		0	Col-0	104269	pCAS-PPO	FALSE
271_LB_104269_pCAS-PPO	ku70	6	296	0.833333	TRUE	5:3902233	reverse	5	3902233	LB	271	19	GTGTAAACAAATTGGTTAA	0		0	Col-0	104269	pCAS-PPO	FALSE
271_LB_104269_pCAS-PPO	ku70	3	197	1	TRUE	5:18603922	reverse	5	18603922	LB	271	0		0		0	Col-0	104269	pCAS-PPO	FALSE
271_LB_104269_pCAS-PPO	ku70	5	300	1	TRUE	5:26808503	reverse	5	26808503	LB	271	0		0		0	Col-0	104269	pCAS-PPO	FALSE
271_LB_104269_pCAS-PPO	ku70	3	223	1	TRUE	5:4043434	reverse	5	4043434	LB	271	10	AAACGCCGGA	0		0	Col-0	104269	pCAS-PPO	FALSE
271_LB_104269_pCAS-PPO	ku70	20	249	0.85	TRUE	5:24903607	forward	5	24903607	LB	271	5	TGTGG	0		-1	Col-0	104269	pCAS-PPO	FALSE
271_LB_104269_pCAS-PPO	ku70	4	230	1	TRUE	5:17524479	reverse	5	17524479	LB	271	0		6	TATCCT	-1	Col-0	104269	pCAS-PPO	FALSE
271_LB_104269_pCAS-PPO	ku70	8	265	1	TRUE	5:24350436	forward	5	24350436	LB	271	0		2	TC	-3	Col-0	104269	pCAS-PPO	FALSE
271_LB_104269_pCAS-PPO	ku70	5	179	1	TRUE	5:2993199	reverse	5	2993199	LB	271	0		0		-4	Col-0	104269	pCAS-PPO	FALSE
271_LB_104269_pCAS-PPO	ku70	8	234	0.875	TRUE	5:16867019	reverse	5	16867019	LB	271	0		3	TAT	-4	Col-0	104269	pCAS-PPO	FALSE
271_LB_104269_pCAS-PPO	ku70	6	288	1	TRUE	5:5622869	reverse	5	5622869	LB	271	33	TGTGGTGTGATCAATTTGTTAACTATGAGCCGT	0		-4	Col-0	104269	pCAS-PPO	FALSE
271_LB_104269_pCAS-PPO	ku70	4	168	1	TRUE	5:7865912	reverse	5	7865912	LB	271	3	CAT	0		-5	Col-0	104269	pCAS-PPO	FALSE
271_LB_104269_pCAS-PPO	ku70	6	234	1	TRUE	5:17094108	forward	5	17094108	LB	271	1	A	0		-5	Col-0	104269	pCAS-PPO	FALSE
271_LB_104269_pCAS-PPO	ku70	13	348	0.923077	TRUE	5:3694970	reverse	5	3694970	LB	271	0		3	TAT	-6	Col-0	104269	pCAS-PPO	FALSE
271_LB_104269_pCAS-PPO	ku70	3	383	1	TRUE	5:8529244	reverse	5	8529244	LB	271	0		5	AATAT	-6	Col-0	104269	pCAS-PPO	FALSE
271_LB_104269_pCAS-PPO	ku70	3	131	1	TRUE	5:8732502	forward	5	8732502	LB	271	29	CACCACAATCAAATCAAGTTGTCTAAACG	0		-7	Col-0	104269	pCAS-PPO	FALSE
271_LB_104269_pCAS-PPO	ku70	17	239	1	TRUE	5:1478104	forward	5	1478104	LB	271	0		0		-7	Col-0	104269	pCAS-PPO	FALSE
271_LB_104269_pCAS-PPO	ku70	4	364	1	TRUE	5:245586	forward	5	245586	LB	271	0		3	ATA	-7	Col-0	104269	pCAS-PPO	FALSE
271_LB_104269_pCAS-PPO	ku70	3	238	1	TRUE	5:5008690	forward	5	5008690	LB	271	7	AAAAAAA	0		-7	Col-0	104269	pCAS-PPO	FALSE
271_LB_104269_pCAS-PPO	ku70	4	269	1	TRUE	5:23982515	reverse	5	23982515	LB	271	0		2	AT	-8	Col-0	104269	pCAS-PPO	FALSE
271_LB_104269_pCAS-PPO	ku70	15	275	1	TRUE	5:91061	forward	5	91061	LB	271	0		2	AA	-9	Col-0	104269	pCAS-PPO	FALSE
271_LB_104269_pCAS-PPO	ku70	6	285	1	TRUE	5:18602167	forward	5	18602167	LB	271	5	TTAAG	0		-10	Col-0	104269	pCAS-PPO	FALSE
271_LB_104269_pCAS-PPO	ku70	3	223	1	TRUE	Mt:39121	forward	Mt	39121	LB	271	0		0		0	Col-0	104269	pCAS-PPO	FALSE
271_RB_104269_pCAS-PPO	ku70	14	164	0.928571	TRUE	1:489548	reverse	1	489548	RB	271	50	ATGGTATATAACTGCATACCTTGTCTCATGGCTATCGTGATCCTCGAAAA	0		-13	Col-0	104269	pCAS-PPO	FALSE
271_RB_104269_pCAS-PPO	ku70	7	243	1	TRUE	1:598704	forward	1	598704	RB	271	4	ACTG	0		-5	Col-0	104269	pCAS-PPO	FALSE
271_RB_104269_pCAS-PPO	ku70	4	142	1	TRUE	1:1096294	forward	1	1096294	RB	271	2	AC	0		-2	Col-0	104269	pCAS-PPO	FALSE
271_RB_104269_pCAS-PPO	ku70	14	227	0.928571	TRUE	1:1234681	forward	1	1234681	RB	271	0		2	GT	-6	Col-0	104269	pCAS-PPO	FALSE
271_RB_104269_pCAS-PPO	ku70	6	201	0.833333	TRUE	1:1410829	forward	1	1410829	RB	271	39	ATTTTCCCGCCTTCCCATCACCTTCACCAACTCATCCAC	0		-6	Col-0	104269	pCAS-PPO	FALSE
271_RB_104269_pCAS-PPO	ku70	12	176	1	TRUE	1:2142787	reverse	1	2142787	RB	271	0		1	A	0	Col-0	104269	pCAS-PPO	FALSE
271_RB_104269_pCAS-PPO	ku70	17	295	0.941176	TRUE	1:2223717	reverse	1	2223717	RB	271	0		0		-2	Col-0	104269	pCAS-PPO	FALSE
271_RB_104269_pCAS-PPO	ku70	12	121	1	TRUE	1:3033696	forward	1	3033696	RB	271	19	TAGTTTAAACTGATAGTTT	0		0	Col-0	104269	pCAS-PPO	FALSE
271_RB_104269_pCAS-PPO	ku70	10	328	1	TRUE	1:3127940	reverse	1	3127940	RB	271	5	GCTTA	0		1	Col-0	104269	pCAS-PPO	FALSE
271_RB_104269_pCAS-PPO	ku70	5	194	1	TRUE	1:3186154	reverse	1	3186154	RB	271	5	TTAAA	0		-6	Col-0	104269	pCAS-PPO	FALSE
271_RB_104269_pCAS-PPO	ku70	10	252	1	TRUE	1:3636876	reverse	1	3636876	RB	271	2	TT	0		0	Col-0	104269	pCAS-PPO	FALSE
271_RB_104269_pCAS-PPO	ku70	152	376	0.825806	TRUE	1:3719036	forward	1	3719036	RB	271	30	GCCAGCTCAAACACTGACCATGTGTTTGGA	0		0	Col-0	104269	pCAS-PPO	FALSE
271_RB_104269_pCAS-PPO	ku70	33	390	1	TRUE	1:4218126	reverse	1	4218126	RB	271	0		4	GTGT	-4	Col-0	104269	pCAS-PPO	FALSE
271_RB_104269_pCAS-PPO	ku70	11	377	1	TRUE	1:4315442	reverse	1	4315442	RB	271	0		1	A	0	Col-0	104269	pCAS-PPO	FALSE
271_RB_104269_pCAS-PPO	ku70	119	441	0.95122	TRUE	1:4327748	reverse	1	4327748	RB	271	27	CGGTCACCTCTTTGAGCTAATTCAGTA	0		-21	Col-0	104269	pCAS-PPO	FALSE
271_RB_104269_pCAS-PPO	ku70	3	173	1	TRUE	1:4571672	reverse	1	4571672	RB	271	0		3	TTG	-1	Col-0	104269	pCAS-PPO	FALSE
271_RB_104269_pCAS-PPO	ku70	4	134	1	TRUE	1:5022064	reverse	1	5022064	RB	271	16	TTAAACAATTTGTTTA	0		-6	Col-0	104269	pCAS-PPO	FALSE
271_RB_104269_pCAS-PPO	ku70	3	286	1	TRUE	1:5048798	forward	1	5048798	RB	271	0		4	TCAG	-7	Col-0	104269	pCAS-PPO	FALSE
271_RB_104269_pCAS-PPO	ku70	3	240	1	TRUE	1:5068480	forward	1	5068480	RB	271	1	G	0		0	Col-0	104269	pCAS-PPO	FALSE
271_RB_104269_pCAS-PPO	ku70	32	625	0.942857	TRUE	1:5151147	forward	1	5151147	RB	271	0		2	TT	-18	Col-0	104269	pCAS-PPO	FALSE
271_RB_104269_pCAS-PPO	ku70	26	269	0.923077	TRUE	1:5465261	forward	1	5465261	RB	271	0		1	A	0	Col-0	104269	pCAS-PPO	FALSE
271_RB_104269_pCAS-PPO	ku70	27	336	0.931034	TRUE	1:5635214	reverse	1	5635214	RB	271	3	ATT	0		-21	Col-0	104269	pCAS-PPO	FALSE
271_RB_104269_pCAS-PPO	ku70	6	294	1	TRUE	1:6968463	forward	1	6968463	RB	271	0		2	TG	-5	Col-0	104269	pCAS-PPO	FALSE
271_RB_104269_pCAS-PPO	ku70	3	237	1	TRUE	1:7408597	reverse	1	7408597	RB	271	0		4	CCTT	-23	Col-0	104269	pCAS-PPO	FALSE
271_RB_104269_pCAS-PPO	ku70	3	209	1	TRUE	1:8292724	reverse	1	8292724	RB	271	6	CTCATT	0		-4	Col-0	104269	pCAS-PPO	FALSE
271_RB_104269_pCAS-PPO	ku70	4	278	0.75	TRUE	1:8524341	reverse	1	8524341	RB	271	0		3	ACT	-12	Col-0	104269	pCAS-PPO	FALSE
271_RB_104269_pCAS-PPO	ku70	6	285	0.833333	TRUE	1:8611343	reverse	1	8611343	RB	271	41	TATATTGATAGTTTAATAATGCAGAAGAGATCTTATTATTC	0		-10	Col-0	104269	pCAS-PPO	FALSE
271_RB_104269_pCAS-PPO	ku70	22	191	1	TRUE	1:8861689	reverse	1	8861689	RB	271	0		2	GA	0	Col-0	104269	pCAS-PPO	FALSE
271_RB_104269_pCAS-PPO	ku70	6	220	1	TRUE	1:9458063	reverse	1	9458063	RB	271	0		2	TT	-31	Col-0	104269	pCAS-PPO	FALSE
271_RB_104269_pCAS-PPO	ku70	3	210	1	TRUE	1:10242352	forward	1	10242352	RB	271	0		5	TTTGA	0	Col-0	104269	pCAS-PPO	FALSE
271_RB_104269_pCAS-PPO	ku70	71	344	1	TRUE	1:10312058	reverse	1	10312058	RB	271	2	TT	0		-6	Col-0	104269	pCAS-PPO	FALSE
271_RB_104269_pCAS-PPO	ku70	56	362	0.947368	TRUE	1:10312063	reverse	1	10312063	RB	271	3	ACT	0		0	Col-0	104269	pCAS-PPO	FALSE
271_RB_104269_pCAS-PPO	ku70	4	111	1	TRUE	1:10492768	forward	1	10492768	RB	271	5	TGTTG	0		-10	Col-0	104269	pCAS-PPO	FALSE
271_RB_104269_pCAS-PPO	ku70	7	174	0.857143	TRUE	1:11651128	reverse	1	11651128	RB	271	0		3	GTT	-32	Col-0	104269	pCAS-PPO	FALSE
271_RB_104269_pCAS-PPO	ku70	4	79	1	TRUE	1:15926052	forward	1	15926052	RB	271	14	AGCTTGAATTTACT	0		-8	Col-0	104269	pCAS-PPO	FALSE
271_RB_104269_pCAS-PPO	ku70	43	238	1	TRUE	1:15981904	reverse	1	15981904	RB	271	0		1	A	0	Col-0	104269	pCAS-PPO	FALSE
271_RB_104269_pCAS-PPO	ku70	28	168	0.793103	TRUE	1:18457929	reverse	1	18457929	RB	271	8	TTAAACTA	0		-6	Col-0	104269	pCAS-PPO	FALSE
271_RB_104269_pCAS-PPO	ku70	7	159	1	TRUE	1:18559968	reverse	1	18559968	RB	271	20	TTTGACATTCAGTGATAAAT	0		2	Col-0	104269	pCAS-PPO	FALSE
271_RB_104269_pCAS-PPO	ku70	4	162	1	TRUE	1:19069750	forward	1	19069750	RB	271	23	AAAAGAGACATTAACACATAACA	0		0	Col-0	104269	pCAS-PPO	FALSE
271_RB_104269_pCAS-PPO	ku70	3	91	1	TRUE	1:19171223	forward	1	19171223	RB	271	0		5	TATCA	-8	Col-0	104269	pCAS-PPO	FALSE
271_RB_104269_pCAS-PPO	ku70	10	253	0.8	TRUE	1:19481415	forward	1	19481415	RB	271	4	ATTG	0		-7	Col-0	104269	pCAS-PPO	FALSE
271_RB_104269_pCAS-PPO	ku70	3	162	1	TRUE	1:20235761	forward	1	20235761	RB	271	2	AA	0		0	Col-0	104269	pCAS-PPO	FALSE
271_RB_104269_pCAS-PPO	ku70	35	445	0.944444	TRUE	1:20735024	reverse	1	20735024	RB	271	0		2	AC	1	Col-0	104269	pCAS-PPO	FALSE
271_RB_104269_pCAS-PPO	ku70	3	188	1	TRUE	1:20910911	forward	1	20910911	RB	271	0		3	CTT	-23	Col-0	104269	pCAS-PPO	FALSE
271_RB_104269_pCAS-PPO	ku70	9	354	1	TRUE	1:21024050	forward	1	21024050	RB	271	0		3	TGT	-4	Col-0	104269	pCAS-PPO	FALSE
271_RB_104269_pCAS-PPO	ku70	16	268	1	TRUE	1:21361984	reverse	1	21361984	RB	271	1	A	0		-8	Col-0	104269	pCAS-PPO	FALSE
271_RB_104269_pCAS-PPO	ku70	6	204	1	TRUE	1:22211414	reverse	1	22211414	RB	271	22	AGCTAGAAGAGATTCGTTCACA	0		-10	Col-0	104269	pCAS-PPO	FALSE
271_RB_104269_pCAS-PPO	ku70	11	160	1	TRUE	1:22387906	forward	1	22387906	RB	271	0		3	TTT	-17	Col-0	104269	pCAS-PPO	FALSE
271_RB_104269_pCAS-PPO	ku70	10	207	1	TRUE	1:22387919	reverse	1	22387919	RB	271	0		4	TTGA	0	Col-0	104269	pCAS-PPO	FALSE
271_RB_104269_pCAS-PPO	ku70	7	119	0.857143	TRUE	1:22727365	reverse	1	22727365	RB	271	4	TATA	0		0	Col-0	104269	pCAS-PPO	FALSE
271_RB_104269_pCAS-PPO	ku70	32	312	0.969697	TRUE	1:23366466	forward	1	23366466	RB	271	0		2	AC	1	Col-0	104269	pCAS-PPO	FALSE
271_RB_104269_pCAS-PPO	ku70	3	273	1	TRUE	1:23824512	reverse	1	23824512	RB	271	0		1	T	-17	Col-0	104269	pCAS-PPO	FALSE
271_RB_104269_pCAS-PPO	ku70	65	321	0.969231	TRUE	1:23899274	reverse	1	23899274	RB	271	0		3	TGA	0	Col-0	104269	pCAS-PPO	FALSE
271_RB_104269_pCAS-PPO	ku70	6	301	1	TRUE	1:24531675	forward	1	24531675	RB	271	0		1	T	-2	Col-0	104269	pCAS-PPO	FALSE
271_RB_104269_pCAS-PPO	ku70	10	160	1	TRUE	1:24845913	reverse	1	24845913	RB	271	4	CCGG	0		-9	Col-0	104269	pCAS-PPO	FALSE
271_RB_104269_pCAS-PPO	ku70	3	202	1	TRUE	1:26141423	reverse	1	26141423	RB	271	0		4	TTGA	0	Col-0	104269	pCAS-PPO	FALSE
271_RB_104269_pCAS-PPO	ku70	4	196	1	TRUE	1:26200081	forward	1	26200081	RB	271	0		5	TTTGA	0	Col-0	104269	pCAS-PPO	FALSE
271_RB_104269_pCAS-PPO	ku70	6	239	0.833333	TRUE	1:26627046	reverse	1	26627046	RB	271	0		4	TGTT	-3	Col-0	104269	pCAS-PPO	FALSE
271_RB_104269_pCAS-PPO	ku70	3	230	1	TRUE	1:26774097	reverse	1	26774097	RB	271	1	A	0		-28	Col-0	104269	pCAS-PPO	FALSE
271_RB_104269_pCAS-PPO	ku70	4	154	1	TRUE	1:26774108	reverse	1	26774108	RB	271	12	AAATATGTTCAT	0		-28	Col-0	104269	pCAS-PPO	FALSE
271_RB_104269_pCAS-PPO	ku70	5	289	0.8	TRUE	1:26919826	reverse	1	26919826	RB	271	11	GATTATATATC	0		-10	Col-0	104269	pCAS-PPO	FALSE
271_RB_104269_pCAS-PPO	ku70	28	361	0.928571	TRUE	1:26941996	reverse	1	26941996	RB	271	0		3	ATC	-9	Col-0	104269	pCAS-PPO	FALSE
271_RB_104269_pCAS-PPO	ku70	4	183	1	TRUE	1:27713046	reverse	1	27713046	RB	271	0		2	TT	-3	Col-0	104269	pCAS-PPO	FALSE
271_RB_104269_pCAS-PPO	ku70	4	93	0.75	TRUE	1:28366670	reverse	1	28366670	RB	271	15	GCGGATATCAGTGTT	0		0	Col-0	104269	pCAS-PPO	FALSE
271_RB_104269_pCAS-PPO	ku70	5	225	1	TRUE	1:28606076	reverse	1	28606076	RB	271	0		0		-22	Col-0	104269	pCAS-PPO	FALSE
271_RB_104269_pCAS-PPO	ku70	32	309	0.90625	TRUE	1:28774676	forward	1	28774676	RB	271	27	TGTCGGTGCTTGGACAGAATTCCGGTA	0		0	Col-0	104269	pCAS-PPO	FALSE
271_RB_104269_pCAS-PPO	ku70	14	303	0.933333	TRUE	1:29243001	reverse	1	29243001	RB	271	0		5	TTTAA	-15	Col-0	104269	pCAS-PPO	FALSE
271_RB_104269_pCAS-PPO	ku70	5	201	0.8	TRUE	1:29388954	reverse	1	29388954	RB	271	4	ATAG	0		0	Col-0	104269	pCAS-PPO	FALSE
271_RB_104269_pCAS-PPO	ku70	3	203	1	TRUE	1:29514541	forward	1	29514541	RB	271	19	TTACGGATATGAATATTTT	0		-14	Col-0	104269	pCAS-PPO	FALSE
271_RB_104269_pCAS-PPO	ku70	3	198	1	TRUE	1:29516004	reverse	1	29516004	RB	271	3	ACT	0		-4	Col-0	104269	pCAS-PPO	FALSE
271_RB_104269_pCAS-PPO	ku70	26	317	0.970588	TRUE	1:29634508	forward	1	29634508	RB	271	1	A	0		-18	Col-0	104269	pCAS-PPO	FALSE
271_RB_104269_pCAS-PPO	ku70	3	170	1	TRUE	1:30280857	reverse	1	30280857	RB	271	18	ACAAAGATTGTATGTACC	0		-26	Col-0	104269	pCAS-PPO	FALSE
271_RB_104269_pCAS-PPO	ku70	4	162	0.75	TRUE	1:28291851	reverse	1	28291851	RB	271	48	CGGTTAACCGCAAACGTGTCATATTGTCGTTTTATCCTGCTTCTCCGA	0		-7	Col-0	104269	pCAS-PPO	FALSE
271_RB_104269_pCAS-PPO	ku70	3	289	1	TRUE	1:15925961	reverse	1	15925961	RB	271	28	AAATAGTTTAAACTATCAGTAAATAATT	0		0	Col-0	104269	pCAS-PPO	FALSE
271_RB_104269_pCAS-PPO	ku70	3	102	1	TRUE	1:8292699	forward	1	8292699	RB	271	62	CTCATTATGAGTGTATTAAAGCTAACAAAAGGAGAATGGAAACAGTTTGATGTAAGAGCAAT	0		-4	Col-0	104269	pCAS-PPO	FALSE
271_RB_104269_pCAS-PPO	ku70	7	226	0.857143	TRUE	2:154092	reverse	2	154092	RB	271	1	G	0		-24	Col-0	104269	pCAS-PPO	FALSE
271_RB_104269_pCAS-PPO	ku70	3	233	1	TRUE	2:259159	forward	2	259159	RB	271	30	AATTAACGCCGAATTGCTCTAGCCAATACT	0		-5	Col-0	104269	pCAS-PPO	FALSE
271_RB_104269_pCAS-PPO	ku70	3	193	1	TRUE	2:744420	forward	2	744420	RB	271	3	ATT	0		-6	Col-0	104269	pCAS-PPO	FALSE
271_RB_104269_pCAS-PPO	ku70	5	235	1	TRUE	2:2332794	forward	2	2332794	RB	271	0		0		-2	Col-0	104269	pCAS-PPO	FALSE
271_RB_104269_pCAS-PPO	ku70	16	317	1	TRUE	2:2593554	forward	2	2593554	RB	271	1	A	0		-26	Col-0	104269	pCAS-PPO	FALSE
271_RB_104269_pCAS-PPO	ku70	20	361	0.909091	TRUE	2:6985466	forward	2	6985466	RB	271	0		2	CT	-24	Col-0	104269	pCAS-PPO	FALSE
271_RB_104269_pCAS-PPO	ku70	3	323	1	TRUE	2:7144011	reverse	2	7144011	RB	271	3	CGT	0		-4	Col-0	104269	pCAS-PPO	FALSE
271_RB_104269_pCAS-PPO	ku70	6	231	1	TRUE	2:7597592	reverse	2	7597592	RB	271	0		1	A	-11	Col-0	104269	pCAS-PPO	FALSE
271_RB_104269_pCAS-PPO	ku70	8	147	0.875	TRUE	2:7901040	reverse	2	7901040	RB	271	12	GATAGTTTAAAC	0		-12	Col-0	104269	pCAS-PPO	FALSE
271_RB_104269_pCAS-PPO	ku70	25	291	0.962963	TRUE	2:7901634	forward	2	7901634	RB	271	0		3	CAG	-20	Col-0	104269	pCAS-PPO	FALSE
271_RB_104269_pCAS-PPO	ku70	4	222	1	TRUE	2:8183815	forward	2	8183815	RB	271	2	AC	0		0	Col-0	104269	pCAS-PPO	FALSE
271_RB_104269_pCAS-PPO	ku70	3	146	1	TRUE	2:8542939	forward	2	8542939	RB	271	56	AACAGATTGTCGTTGCGCAGCCTGAATGGCGAATGAGCTTGAGCTTGGATCAGATT	0		-25	Col-0	104269	pCAS-PPO	FALSE
271_RB_104269_pCAS-PPO	ku70	3	283	1	TRUE	2:8876531	reverse	2	8876531	RB	271	0		4	TGTT	-3	Col-0	104269	pCAS-PPO	FALSE
271_RB_104269_pCAS-PPO	ku70	21	343	0.909091	TRUE	2:9207822	reverse	2	9207822	RB	271	5	TCCAG	0		0	Col-0	104269	pCAS-PPO	FALSE
271_RB_104269_pCAS-PPO	ku70	3	218	1	TRUE	2:9215322	forward	2	9215322	RB	271	0		4	TTGA	0	Col-0	104269	pCAS-PPO	FALSE
271_RB_104269_pCAS-PPO	ku70	14	250	0.928571	TRUE	2:9428263	forward	2	9428263	RB	271	0		1	T	-6	Col-0	104269	pCAS-PPO	FALSE
271_RB_104269_pCAS-PPO	ku70	50	320	0.92	TRUE	2:9428258	forward	2	9428258	RB	271	2	AC	0		-4	Col-0	104269	pCAS-PPO	FALSE
271_RB_104269_pCAS-PPO	ku70	6	199	1	TRUE	2:9435427	reverse	2	9435427	RB	271	56	AACAGATTGTCGTTGCGCAGCCTGAATGGCGAATGAGCTTGAGCTTGGAATTTTAA	0		-25	Col-0	104269	pCAS-PPO	FALSE
271_RB_104269_pCAS-PPO	ku70	56	238	0.954545	TRUE	2:10430385	reverse	2	10430385	RB	271	43	ATTTAATCTGAAGCTCAAGATTAAATACATTAACATTAAGTCC	0		-25	Col-0	104269	pCAS-PPO	FALSE
271_RB_104269_pCAS-PPO	ku70	4	477	1	TRUE	2:10548848	reverse	2	10548848	RB	271	11	CCTGAAGAGGC	0		-7	Col-0	104269	pCAS-PPO	FALSE
271_RB_104269_pCAS-PPO	ku70	3	268	1	TRUE	2:10652579	reverse	2	10652579	RB	271	0		1	G	-1	Col-0	104269	pCAS-PPO	FALSE
271_RB_104269_pCAS-PPO	ku70	10	202	0.9	TRUE	2:12498752	forward	2	12498752	RB	271	10	TCCTGATTAG	0		-10	Col-0	104269	pCAS-PPO	FALSE
271_RB_104269_pCAS-PPO	ku70	5	342	1	TRUE	2:14239982	reverse	2	14239982	RB	271	0		4	AAAC	-13	Col-0	104269	pCAS-PPO	FALSE
271_RB_104269_pCAS-PPO	ku70	20	166	0.95	TRUE	2:14507902	forward	2	14507902	RB	271	0		3	TGA	0	Col-0	104269	pCAS-PPO	FALSE
271_RB_104269_pCAS-PPO	ku70	5	232	1	TRUE	2:14663716	reverse	2	14663716	RB	271	0		2	GA	0	Col-0	104269	pCAS-PPO	FALSE
271_RB_104269_pCAS-PPO	ku70	12	408	1	TRUE	2:14888145	reverse	2	14888145	RB	271	29	GCAGCACATCCCCTTTCGCCAGTATGACG	0		-23	Col-0	104269	pCAS-PPO	FALSE
271_RB_104269_pCAS-PPO	ku70	3	297	1	TRUE	2:15077170	reverse	2	15077170	RB	271	15	ATAGAGCAATTCGGT	0		0	Col-0	104269	pCAS-PPO	FALSE
271_RB_104269_pCAS-PPO	ku70	8	180	1	TRUE	2:15090535	reverse	2	15090535	RB	271	2	TT	0		-1	Col-0	104269	pCAS-PPO	FALSE
271_RB_104269_pCAS-PPO	ku70	54	278	0.963636	TRUE	2:15189511	reverse	2	15189511	RB	271	0		5	TTTGA	0	Col-0	104269	pCAS-PPO	FALSE
271_RB_104269_pCAS-PPO	ku70	4	169	0.75	TRUE	2:15293403	reverse	2	15293403	RB	271	15	TAGTCATCGTCTTCT	0		0	Col-0	104269	pCAS-PPO	FALSE
271_RB_104269_pCAS-PPO	ku70	3	114	1	TRUE	2:15376361	forward	2	15376361	RB	271	64	GGAAACGCTTTTACAGTTGTCTAAGCGTTAATTCAGTAATCATAATTATAATTTATATATATTA	0		-22	Col-0	104269	pCAS-PPO	FALSE
271_RB_104269_pCAS-PPO	ku70	12	227	1	TRUE	2:15584211	forward	2	15584211	RB	271	4	AAAT	0		0	Col-0	104269	pCAS-PPO	FALSE
271_RB_104269_pCAS-PPO	ku70	14	219	0.928571	TRUE	2:16138411	forward	2	16138411	RB	271	19	TAGTTTCTCTATAAAACTG	0		0	Col-0	104269	pCAS-PPO	FALSE
271_RB_104269_pCAS-PPO	ku70	4	279	1	TRUE	2:17167870	forward	2	17167870	RB	271	0		2	CA	-21	Col-0	104269	pCAS-PPO	FALSE
271_RB_104269_pCAS-PPO	ku70	5	251	1	TRUE	2:17167864	forward	2	17167864	RB	271	0		4	AAAC	-13	Col-0	104269	pCAS-PPO	FALSE
271_RB_104269_pCAS-PPO	ku70	4	253	1	TRUE	2:17258597	reverse	2	17258597	RB	271	0		2	GC	-26	Col-0	104269	pCAS-PPO	FALSE
271_RB_104269_pCAS-PPO	ku70	7	232	1	TRUE	2:17527980	reverse	2	17527980	RB	271	0		4	AGTG	-5	Col-0	104269	pCAS-PPO	FALSE
271_RB_104269_pCAS-PPO	ku70	3	99	1	TRUE	2:17746348	reverse	2	17746348	RB	271	14	ATGATGTTCTAGAG	0		-13	Col-0	104269	pCAS-PPO	FALSE
271_RB_104269_pCAS-PPO	ku70	30	251	0.8125	TRUE	2:17753074	reverse	2	17753074	RB	271	0		5	TTAAA	-14	Col-0	104269	pCAS-PPO	FALSE
271_RB_104269_pCAS-PPO	ku70	5	300	1	TRUE	2:18185741	reverse	2	18185741	RB	271	0		5	TCAGT	-6	Col-0	104269	pCAS-PPO	FALSE
271_RB_104269_pCAS-PPO	ku70	3	186	1	TRUE	2:18481948	forward	2	18481948	RB	271	11	ACATATTAGTA	0		-13	Col-0	104269	pCAS-PPO	FALSE
271_RB_104269_pCAS-PPO	ku70	11	297	0.909091	TRUE	2:18728714	reverse	2	18728714	RB	271	0		8	GTTTAAAC	-13	Col-0	104269	pCAS-PPO	FALSE
271_RB_104269_pCAS-PPO	ku70	3	183	1	TRUE	2:18785822	forward	2	18785822	RB	271	0		6	TTTGAC	1	Col-0	104269	pCAS-PPO	FALSE
271_RB_104269_pCAS-PPO	ku70	3	159	1	TRUE	2:18840178	forward	2	18840178	RB	271	0		4	CCTT	-23	Col-0	104269	pCAS-PPO	FALSE
271_RB_104269_pCAS-PPO	ku70	16	280	1	TRUE	2:18957255	reverse	2	18957255	RB	271	0		3	TGA	0	Col-0	104269	pCAS-PPO	FALSE
271_RB_104269_pCAS-PPO	ku70	5	100	1	TRUE	2:19409001	forward	2	19409001	RB	271	0		3	ACA	2	Col-0	104269	pCAS-PPO	FALSE
271_RB_104269_pCAS-PPO	ku70	22	248	1	TRUE	2:19448011	reverse	2	19448011	RB	271	0		5	TCGTT	-32	Col-0	104269	pCAS-PPO	FALSE
271_RB_104269_pCAS-PPO	ku70	3	180	1	TRUE	2:8686197	reverse	2	8686197	RB	271	50	TCAAGGACACGTTGATAATCTCTTGTTGTTGTTGTTCTGCACCGATCGCC	0		0	Col-0	104269	pCAS-PPO	FALSE
271_RB_104269_pCAS-PPO	ku70	7	302	1	TRUE	3:75821	forward	3	75821	RB	271	6	AATCAG	0		-2	Col-0	104269	pCAS-PPO	FALSE
271_RB_104269_pCAS-PPO	ku70	166	395	0.927711	TRUE	3:768056	reverse	3	768056	RB	271	19	AATTTAGTAGTCCAGGCTG	0		0	Col-0	104269	pCAS-PPO	FALSE
271_RB_104269_pCAS-PPO	ku70	28	255	0.964286	TRUE	3:795206	reverse	3	795206	RB	271	17	TGCGATCCAAGCTCGAT	0		0	Col-0	104269	pCAS-PPO	FALSE
271_RB_104269_pCAS-PPO	ku70	4	193	1	TRUE	3:1137123	forward	3	1137123	RB	271	1	G	0		0	Col-0	104269	pCAS-PPO	FALSE
271_RB_104269_pCAS-PPO	ku70	10	207	1	TRUE	3:1327384	forward	3	1327384	RB	271	23	AAACTGAAACATAAACTGAATTA	0		-2	Col-0	104269	pCAS-PPO	FALSE
271_RB_104269_pCAS-PPO	ku70	4	190	1	TRUE	3:1985628	reverse	3	1985628	RB	271	16	CCCGCCTTCAGTTTAA	0		-2	Col-0	104269	pCAS-PPO	FALSE
271_RB_104269_pCAS-PPO	ku70	10	365	1	TRUE	3:3184585	reverse	3	3184585	RB	271	2	TA	0		-1	Col-0	104269	pCAS-PPO	FALSE
271_RB_104269_pCAS-PPO	ku70	26	211	0.923077	TRUE	3:3405568	forward	3	3405568	RB	271	0		1	A	0	Col-0	104269	pCAS-PPO	FALSE
271_RB_104269_pCAS-PPO	ku70	23	259	1	TRUE	3:3405657	reverse	3	3405657	RB	271	0		3	ATC	-9	Col-0	104269	pCAS-PPO	FALSE
271_RB_104269_pCAS-PPO	ku70	14	269	0.933333	TRUE	3:3432571	reverse	3	3432571	RB	271	6	CGACAT	0		-17	Col-0	104269	pCAS-PPO	FALSE
271_RB_104269_pCAS-PPO	ku70	3	267	1	TRUE	3:3619965	forward	3	3619965	RB	271	47	AACAGATTGTCGTTGCGCAGCCTGAATGGCGAATGAGCTTGAGCTTG	0		-25	Col-0	104269	pCAS-PPO	FALSE
271_RB_104269_pCAS-PPO	ku70	7	290	1	TRUE	3:4004598	reverse	3	4004598	RB	271	14	AACTGATACAAGCT	0		0	Col-0	104269	pCAS-PPO	FALSE
271_RB_104269_pCAS-PPO	ku70	18	223	0.833333	TRUE	3:4034717	reverse	3	4034717	RB	271	0		3	ACT	-12	Col-0	104269	pCAS-PPO	FALSE
271_RB_104269_pCAS-PPO	ku70	13	275	1	TRUE	3:4084276	forward	3	4084276	RB	271	3	TGA	0		-12	Col-0	104269	pCAS-PPO	FALSE
271_RB_104269_pCAS-PPO	ku70	28	347	1	TRUE	3:4790642	forward	3	4790642	RB	271	0		4	GTGT	-4	Col-0	104269	pCAS-PPO	FALSE
271_RB_104269_pCAS-PPO	ku70	13	249	0.923077	TRUE	3:5837858	reverse	3	5837858	RB	271	0		1	T	-19	Col-0	104269	pCAS-PPO	FALSE
271_RB_104269_pCAS-PPO	ku70	4	195	0.75	TRUE	3:6086455	reverse	3	6086455	RB	271	0		5	TTTAA	-15	Col-0	104269	pCAS-PPO	FALSE
271_RB_104269_pCAS-PPO	ku70	5	200	1	TRUE	3:6717261	forward	3	6717261	RB	271	2	AC	0		-6	Col-0	104269	pCAS-PPO	FALSE
271_RB_104269_pCAS-PPO	ku70	4	97	1	TRUE	3:7191387	forward	3	7191387	RB	271	0		0		-26	Col-0	104269	pCAS-PPO	FALSE
271_RB_104269_pCAS-PPO	ku70	4	283	1	TRUE	3:7239140	forward	3	7239140	RB	271	7	ACTGGGT	0		0	Col-0	104269	pCAS-PPO	FALSE
271_RB_104269_pCAS-PPO	ku70	7	194	1	TRUE	3:7865563	forward	3	7865563	RB	271	0		7	AAACTAT	-10	Col-0	104269	pCAS-PPO	FALSE
271_RB_104269_pCAS-PPO	ku70	5	182	1	TRUE	3:7987097	forward	3	7987097	RB	271	3	GGC	0		0	Col-0	104269	pCAS-PPO	FALSE
271_RB_104269_pCAS-PPO	ku70	4	193	1	TRUE	3:8867964	reverse	3	8867964	RB	271	2	AA	0		-13	Col-0	104269	pCAS-PPO	FALSE
271_RB_104269_pCAS-PPO	ku70	6	225	1	TRUE	3:8904312	reverse	3	8904312	RB	271	0		7	GTGTTTG	-1	Col-0	104269	pCAS-PPO	FALSE
271_RB_104269_pCAS-PPO	ku70	57	261	0.912281	TRUE	3:10021607	forward	3	10021607	RB	271	0		2	AA	-15	Col-0	104269	pCAS-PPO	FALSE
271_RB_104269_pCAS-PPO	ku70	3	171	1	TRUE	3:14651638	reverse	3	14651638	RB	271	1	C	0		-7	Col-0	104269	pCAS-PPO	FALSE
271_RB_104269_pCAS-PPO	ku70	7	330	1	TRUE	3:15697481	forward	3	15697481	RB	271	67	AACTGTTGAGAGAAATTTAGAAGCCCAAAAAGTGTTATTACGCCAGCTGATCGGTGCGGGCCTCTGT	0		-26	Col-0	104269	pCAS-PPO	FALSE
271_RB_104269_pCAS-PPO	ku70	3	197	1	TRUE	3:16744017	forward	3	16744017	RB	271	0		4	TTTA	-16	Col-0	104269	pCAS-PPO	FALSE
271_RB_104269_pCAS-PPO	ku70	6	339	0.833333	TRUE	3:18222039	forward	3	18222039	RB	271	0		3	TGA	0	Col-0	104269	pCAS-PPO	FALSE
271_RB_104269_pCAS-PPO	ku70	5	103	1	TRUE	3:18238053	forward	3	18238053	RB	271	0		6	TTTAAA	-14	Col-0	104269	pCAS-PPO	FALSE
271_RB_104269_pCAS-PPO	ku70	4	213	1	TRUE	3:18250692	forward	3	18250692	RB	271	0		6	TATCAG	-7	Col-0	104269	pCAS-PPO	FALSE
271_RB_104269_pCAS-PPO	ku70	5	222	1	TRUE	3:18250684	forward	3	18250684	RB	271	0		1	T	-4	Col-0	104269	pCAS-PPO	FALSE
271_RB_104269_pCAS-PPO	ku70	14	362	0.866667	TRUE	3:18373812	reverse	3	18373812	RB	271	4	ACGT	0		-29	Col-0	104269	pCAS-PPO	FALSE
271_RB_104269_pCAS-PPO	ku70	7	196	1	TRUE	3:18667808	reverse	3	18667808	RB	271	0		1	T	-19	Col-0	104269	pCAS-PPO	FALSE
271_RB_104269_pCAS-PPO	ku70	5	207	0.909091	TRUE	3:18818874	forward	3	18818874	RB	271	0		0		-32	Col-0	104269	pCAS-PPO	FALSE
271_RB_104269_pCAS-PPO	ku70	8	229	1	TRUE	3:18973074	forward	3	18973074	RB	271	0		0		-28	Col-0	104269	pCAS-PPO	FALSE
271_RB_104269_pCAS-PPO	ku70	3	237	1	TRUE	3:19057438	reverse	3	19057438	RB	271	11	TTTACACCACA	0		-1	Col-0	104269	pCAS-PPO	FALSE
271_RB_104269_pCAS-PPO	ku70	6	373	1	TRUE	3:20311795	forward	3	20311795	RB	271	0		3	TTC	-22	Col-0	104269	pCAS-PPO	FALSE
271_RB_104269_pCAS-PPO	ku70	33	263	0.969697	TRUE	3:21935705	reverse	3	21935705	RB	271	5	ACTAA	0		0	Col-0	104269	pCAS-PPO	FALSE
271_RB_104269_pCAS-PPO	ku70	6	118	0.833333	TRUE	3:22202567	reverse	3	22202567	RB	271	17	CCAAGATATCTCATTAG	0		-5	Col-0	104269	pCAS-PPO	FALSE
271_RB_104269_pCAS-PPO	ku70	7	231	1	TRUE	3:22285704	forward	3	22285704	RB	271	0		1	A	0	Col-0	104269	pCAS-PPO	FALSE
271_RB_104269_pCAS-PPO	ku70	5	257	0.8	TRUE	3:22327469	forward	3	22327469	RB	271	0		0		-7	Col-0	104269	pCAS-PPO	FALSE
271_RB_104269_pCAS-PPO	ku70	4	183	1	TRUE	3:22363924	forward	3	22363924	RB	271	0		4	ACTA	-11	Col-0	104269	pCAS-PPO	FALSE
271_RB_104269_pCAS-PPO	ku70	11	182	0.909091	TRUE	3:22921028	forward	3	22921028	RB	271	1	G	0		-4	Col-0	104269	pCAS-PPO	FALSE
271_RB_104269_pCAS-PPO	ku70	5	106	1	TRUE	3:22979395	forward	3	22979395	RB	271	10	AAACTATCAG	0		-2	Col-0	104269	pCAS-PPO	FALSE
271_RB_104269_pCAS-PPO	ku70	3	153	1	TRUE	3:22993505	forward	3	22993505	RB	271	2	AA	0		-2	Col-0	104269	pCAS-PPO	FALSE
271_RB_104269_pCAS-PPO	ku70	5	198	0.8	TRUE	3:23137525	reverse	3	23137525	RB	271	6	TAGTTA	0		0	Col-0	104269	pCAS-PPO	FALSE
271_RB_104269_pCAS-PPO	ku70	5	152	1	TRUE	3:23437559	reverse	3	23437559	RB	271	11	AATACTCGGTT	0		-20	Col-0	104269	pCAS-PPO	FALSE
271_RB_104269_pCAS-PPO	ku70	4	142	1	TRUE	3:3581710	reverse	3	3581710	RB	271	44	AGATAGTGGAAAAGGAAGGATAATAATAAAAGGAAGTTTTATTT	0		0	Col-0	104269	pCAS-PPO	FALSE
271_RB_104269_pCAS-PPO	ku70	4	169	1	TRUE	3:17388058	forward	3	17388058	RB	271	39	TAGTTTAAGAAATTGGTTTCAAGAAAGAAATTGGTTTCC	0		0	Col-0	104269	pCAS-PPO	FALSE
271_RB_104269_pCAS-PPO	ku70	3	122	1	TRUE	4:188671	reverse	4	188671	RB	271	38	CTTTGCCGGCATCCGTGCCATCACCATGGAGACAATCG	0		-21	Col-0	104269	pCAS-PPO	FALSE
271_RB_104269_pCAS-PPO	ku70	20	289	0.95	TRUE	4:560127	forward	4	560127	RB	271	7	TAAATAT	0		-1	Col-0	104269	pCAS-PPO	FALSE
271_RB_104269_pCAS-PPO	ku70	25	287	0.961538	TRUE	4:560135	forward	4	560135	RB	271	0		1	G	-1	Col-0	104269	pCAS-PPO	FALSE
271_RB_104269_pCAS-PPO	ku70	17	518	0.941176	TRUE	4:697069	reverse	4	697069	RB	271	11	TTATTGGTTGT	0		0	Col-0	104269	pCAS-PPO	FALSE
271_RB_104269_pCAS-PPO	ku70	6	245	0.833333	TRUE	4:731018	forward	4	731018	RB	271	0		5	TTTCC	-29	Col-0	104269	pCAS-PPO	FALSE
271_RB_104269_pCAS-PPO	ku70	33	488	0.894737	TRUE	4:731078	reverse	4	731078	RB	271	18	CAACAATTGCCCAAAACC	0		-22	Col-0	104269	pCAS-PPO	FALSE
271_RB_104269_pCAS-PPO	ku70	3	198	0.75	TRUE	4:731452	forward	4	731452	RB	271	0		2	AG	-7	Col-0	104269	pCAS-PPO	FALSE
271_RB_104269_pCAS-PPO	ku70	11	326	0.909091	TRUE	4:731712	forward	4	731712	RB	271	0		2	CC	-28	Col-0	104269	pCAS-PPO	FALSE
271_RB_104269_pCAS-PPO	ku70	19	368	1	TRUE	4:731735	forward	4	731735	RB	271	0		2	GA	0	Col-0	104269	pCAS-PPO	FALSE
271_RB_104269_pCAS-PPO	ku70	7	310	1	TRUE	4:731963	reverse	4	731963	RB	271	0		2	GA	0	Col-0	104269	pCAS-PPO	FALSE
271_RB_104269_pCAS-PPO	ku70	13	348	0.9375	TRUE	4:731983	reverse	4	731983	RB	271	0		0		-17	Col-0	104269	pCAS-PPO	FALSE
271_RB_104269_pCAS-PPO	ku70	6	130	0.833333	TRUE	4:761397	forward	4	761397	RB	271	45	ACTGGTGCAGACCGCCGGCATGTCCAACATCAAACACTGATAGTT	0		-13	Col-0	104269	pCAS-PPO	FALSE
271_RB_104269_pCAS-PPO	ku70	20	178	0.952381	TRUE	4:1594409	forward	4	1594409	RB	271	4	ATTA	0		-32	Col-0	104269	pCAS-PPO	FALSE
271_RB_104269_pCAS-PPO	ku70	11	244	1	TRUE	4:2242372	forward	4	2242372	RB	271	15	TTAAAAAAACCACCT	0		-6	Col-0	104269	pCAS-PPO	FALSE
271_RB_104269_pCAS-PPO	ku70	17	239	1	TRUE	4:3026583	forward	4	3026583	RB	271	2	TA	0		0	Col-0	104269	pCAS-PPO	FALSE
271_RB_104269_pCAS-PPO	ku70	4	259	1	TRUE	4:6065901	reverse	4	6065901	RB	271	5	ATTTT	0		-6	Col-0	104269	pCAS-PPO	FALSE
271_RB_104269_pCAS-PPO	ku70	9	246	1	TRUE	4:6865899	forward	4	6865899	RB	271	3	GTA	0		-1	Col-0	104269	pCAS-PPO	FALSE
271_RB_104269_pCAS-PPO	ku70	3	260	1	TRUE	4:7663290	reverse	4	7663290	RB	271	23	TCAATGTGAATATCTTTATGTGA	0		0	Col-0	104269	pCAS-PPO	FALSE
271_RB_104269_pCAS-PPO	ku70	7	126	0.857143	TRUE	4:8211404	forward	4	8211404	RB	271	14	CAAGACACTAATGT	0		-5	Col-0	104269	pCAS-PPO	FALSE
271_RB_104269_pCAS-PPO	ku70	6	312	1	TRUE	4:8870140	reverse	4	8870140	RB	271	0		4	TTTG	-1	Col-0	104269	pCAS-PPO	FALSE
271_RB_104269_pCAS-PPO	ku70	4	284	1	TRUE	4:8908848	forward	4	8908848	RB	271	0		3	TGT	-4	Col-0	104269	pCAS-PPO	FALSE
271_RB_104269_pCAS-PPO	ku70	4	172	0.75	TRUE	4:9392325	reverse	4	9392325	RB	271	0		4	ATCA	-8	Col-0	104269	pCAS-PPO	FALSE
271_RB_104269_pCAS-PPO	ku70	5	284	1	TRUE	4:9871269	reverse	4	9871269	RB	271	0		2	AC	-13	Col-0	104269	pCAS-PPO	FALSE
271_RB_104269_pCAS-PPO	ku70	10	332	0.9	TRUE	4:9871275	reverse	4	9871275	RB	271	0		9	GTGTTTGAC	1	Col-0	104269	pCAS-PPO	FALSE
271_RB_104269_pCAS-PPO	ku70	9	275	1	TRUE	4:9980299	forward	4	9980299	RB	271	4	ATAA	0		0	Col-0	104269	pCAS-PPO	FALSE
271_RB_104269_pCAS-PPO	ku70	3	141	1	TRUE	4:9980293	forward	4	9980293	RB	271	12	ATAATTCGTTTT	0		0	Col-0	104269	pCAS-PPO	FALSE
271_RB_104269_pCAS-PPO	ku70	16	265	0.8125	TRUE	4:10576508	reverse	4	10576508	RB	271	22	GAATGTGTTATTAAGTTGACGT	0		0	Col-0	104269	pCAS-PPO	FALSE
271_RB_104269_pCAS-PPO	ku70	3	272	1	TRUE	4:10927497	reverse	4	10927497	RB	271	0		2	CC	-28	Col-0	104269	pCAS-PPO	FALSE
271_RB_104269_pCAS-PPO	ku70	31	311	0.951613	TRUE	4:11105226	forward	4	11105226	RB	271	0		3	TCC	-29	Col-0	104269	pCAS-PPO	FALSE
271_RB_104269_pCAS-PPO	ku70	3	253	1	TRUE	4:11463639	forward	4	11463639	RB	271	0		1	A	0	Col-0	104269	pCAS-PPO	FALSE
271_RB_104269_pCAS-PPO	ku70	4	304	1	TRUE	4:11968141	forward	4	11968141	RB	271	2	AA	0		0	Col-0	104269	pCAS-PPO	FALSE
271_RB_104269_pCAS-PPO	ku70	9	313	1	TRUE	4:12327672	reverse	4	12327672	RB	271	0		0		0	Col-0	104269	pCAS-PPO	FALSE
271_RB_104269_pCAS-PPO	ku70	4	323	0.75	TRUE	4:12547002	reverse	4	12547002	RB	271	8	TCATTGAG	0		-6	Col-0	104269	pCAS-PPO	FALSE
271_RB_104269_pCAS-PPO	ku70	58	270	0.915254	TRUE	4:13634148	forward	4	13634148	RB	271	0		3	TAA	-15	Col-0	104269	pCAS-PPO	FALSE
271_RB_104269_pCAS-PPO	ku70	33	274	0.969697	TRUE	4:13634133	forward	4	13634133	RB	271	0		1	A	0	Col-0	104269	pCAS-PPO	FALSE
271_RB_104269_pCAS-PPO	ku70	27	398	0.962963	TRUE	4:13968787	reverse	4	13968787	RB	271	0		4	CTAT	-10	Col-0	104269	pCAS-PPO	FALSE
271_RB_104269_pCAS-PPO	ku70	6	324	1	TRUE	4:14088664	reverse	4	14088664	RB	271	13	AATGACCATTTTC	0		-28	Col-0	104269	pCAS-PPO	FALSE
271_RB_104269_pCAS-PPO	ku70	8	163	1	TRUE	4:14238704	forward	4	14238704	RB	271	8	CCACCAAA	0		-5	Col-0	104269	pCAS-PPO	FALSE
271_RB_104269_pCAS-PPO	ku70	7	257	1	TRUE	4:14269450	forward	4	14269450	RB	271	0		7	TGTTTGA	0	Col-0	104269	pCAS-PPO	FALSE
271_RB_104269_pCAS-PPO	ku70	36	329	1	TRUE	4:14873526	forward	4	14873526	RB	271	9	TGTATCTCC	0		0	Col-0	104269	pCAS-PPO	FALSE
271_RB_104269_pCAS-PPO	ku70	19	244	1	TRUE	4:15345364	forward	4	15345364	RB	271	0		2	CA	2	Col-0	104269	pCAS-PPO	FALSE
271_RB_104269_pCAS-PPO	ku70	6	255	1	TRUE	4:15834106	forward	4	15834106	RB	271	0		1	C	-9	Col-0	104269	pCAS-PPO	FALSE
271_RB_104269_pCAS-PPO	ku70	4	243	1	TRUE	4:15834225	reverse	4	15834225	RB	271	4	TAGT	0		0	Col-0	104269	pCAS-PPO	FALSE
271_RB_104269_pCAS-PPO	ku70	5	234	0.8	TRUE	4:15881178	forward	4	15881178	RB	271	0		3	TAA	-15	Col-0	104269	pCAS-PPO	FALSE
271_RB_104269_pCAS-PPO	ku70	6	191	1	TRUE	4:15961980	forward	4	15961980	RB	271	33	CCCCGGCAACATAGACAGACTGCTAGGACTCCA	0		-8	Col-0	104269	pCAS-PPO	FALSE
271_RB_104269_pCAS-PPO	ku70	13	279	0.846154	TRUE	4:16519009	reverse	4	16519009	RB	271	0		3	AGT	-6	Col-0	104269	pCAS-PPO	FALSE
271_RB_104269_pCAS-PPO	ku70	20	194	0.75	TRUE	4:16703334	reverse	4	16703334	RB	271	23	ATTGTCGTTTCCCGCATTTGTGT	0		-7	Col-0	104269	pCAS-PPO	FALSE
271_RB_104269_pCAS-PPO	ku70	19	229	0.947368	TRUE	4:16742050	forward	4	16742050	RB	271	11	GAGCTTGGATA	0		-17	Col-0	104269	pCAS-PPO	FALSE
271_RB_104269_pCAS-PPO	ku70	3	266	1	TRUE	4:17414128	reverse	4	17414128	RB	271	0		5	TGTTT	-2	Col-0	104269	pCAS-PPO	FALSE
271_RB_104269_pCAS-PPO	ku70	4	356	1	TRUE	4:17495524	forward	4	17495524	RB	271	0		4	TTGA	0	Col-0	104269	pCAS-PPO	FALSE
271_RB_104269_pCAS-PPO	ku70	3	138	1	TRUE	4:17495544	reverse	4	17495544	RB	271	0		4	ACTA	-11	Col-0	104269	pCAS-PPO	FALSE
271_RB_104269_pCAS-PPO	ku70	4	266	1	TRUE	4:17979960	forward	4	17979960	RB	271	4	TCAG	0		-10	Col-0	104269	pCAS-PPO	FALSE
271_RB_104269_pCAS-PPO	ku70	20	345	0.9	TRUE	4:18104077	reverse	4	18104077	RB	271	0		2	TG	-5	Col-0	104269	pCAS-PPO	FALSE
271_RB_104269_pCAS-PPO	ku70	5	170	0.8	TRUE	4:18207726	forward	4	18207726	RB	271	7	TGTACTG	0		0	Col-0	104269	pCAS-PPO	FALSE
271_RB_104269_pCAS-PPO	ku70	9	151	1	TRUE	4:733231	reverse	4	733231	RB	271	57	CATGCCACAGGTGGATCTGATGAGGGATAGATCCGTAAAAATTAAGTTGGGAGCATT	0		-5	Col-0	104269	pCAS-PPO	FALSE
271_RB_104269_pCAS-PPO	ku70	5	176	0.833333	TRUE	4:13102653	forward	4	13102653	RB	271	39	AGCAAAAACACTGATAATATTTAAAGCAAAAACGACGGC	0		0	Col-0	104269	pCAS-PPO	FALSE
271_RB_104269_pCAS-PPO	ku70	4	172	1	TRUE	5:578877	forward	5	578877	RB	271	3	AGT	0		-20	Col-0	104269	pCAS-PPO	FALSE
271_RB_104269_pCAS-PPO	ku70	12	218	1	TRUE	5:707002	forward	5	707002	RB	271	0		2	TG	-5	Col-0	104269	pCAS-PPO	FALSE
271_RB_104269_pCAS-PPO	ku70	11	253	1	TRUE	5:721535	reverse	5	721535	RB	271	0		2	GA	0	Col-0	104269	pCAS-PPO	FALSE
271_RB_104269_pCAS-PPO	ku70	4	226	0.75	TRUE	5:880137	reverse	5	880137	RB	271	0		4	GTTT	-31	Col-0	104269	pCAS-PPO	FALSE
271_RB_104269_pCAS-PPO	ku70	3	305	1	TRUE	5:903035	reverse	5	903035	RB	271	51	GCAACCGCCGGCAGCCGGTGCGCCGTCGATTAGGAAGTTCCCAATTTGTTT	0		-27	Col-0	104269	pCAS-PPO	FALSE
271_RB_104269_pCAS-PPO	ku70	4	179	1	TRUE	5:1348299	reverse	5	1348299	RB	271	0		0		-2	Col-0	104269	pCAS-PPO	FALSE
271_RB_104269_pCAS-PPO	ku70	4	258	1	TRUE	5:2608633	reverse	5	2608633	RB	271	0		3	TCA	-8	Col-0	104269	pCAS-PPO	FALSE
271_RB_104269_pCAS-PPO	ku70	5	351	0.8	TRUE	5:3191175	forward	5	3191175	RB	271	64	AACAGATTGTCGTTGCGCAGCCTGAATGGCGAATGAGCTTGAGCTTGGATCAGATTGTACATTA	0		-25	Col-0	104269	pCAS-PPO	FALSE
271_RB_104269_pCAS-PPO	ku70	4	234	1	TRUE	5:3225386	reverse	5	3225386	RB	271	0		3	GTG	-5	Col-0	104269	pCAS-PPO	FALSE
271_RB_104269_pCAS-PPO	ku70	3	311	1	TRUE	5:4397060	forward	5	4397060	RB	271	19	GCTATTAAGCAGATAAGGT	0		-22	Col-0	104269	pCAS-PPO	FALSE
271_RB_104269_pCAS-PPO	ku70	60	329	0.966667	TRUE	5:4493041	reverse	5	4493041	RB	271	9	TCTGTAGGC	0		-14	Col-0	104269	pCAS-PPO	FALSE
271_RB_104269_pCAS-PPO	ku70	10	196	1	TRUE	5:4501145	reverse	5	4501145	RB	271	0		2	TT	-23	Col-0	104269	pCAS-PPO	FALSE
271_RB_104269_pCAS-PPO	ku70	26	231	0.892857	TRUE	5:4843168	reverse	5	4843168	RB	271	34	AACTGTGACATTTTTAATGCATATTAACCATTTT	0		-27	Col-0	104269	pCAS-PPO	FALSE
271_RB_104269_pCAS-PPO	ku70	4	271	1	TRUE	5:5052854	forward	5	5052854	RB	271	0		2	TG	-5	Col-0	104269	pCAS-PPO	FALSE
271_RB_104269_pCAS-PPO	ku70	9	246	1	TRUE	5:5551602	forward	5	5551602	RB	271	0		0		0	Col-0	104269	pCAS-PPO	FALSE
271_RB_104269_pCAS-PPO	ku70	18	236	0.894737	TRUE	5:6421906	forward	5	6421906	RB	271	2	CA	0		-18	Col-0	104269	pCAS-PPO	FALSE
271_RB_104269_pCAS-PPO	ku70	10	222	0.818182	TRUE	5:6451070	forward	5	6451070	RB	271	0		3	AAC	-13	Col-0	104269	pCAS-PPO	FALSE
271_RB_104269_pCAS-PPO	ku70	4	194	1	TRUE	5:6705213	reverse	5	6705213	RB	271	0		4	TTTA	-16	Col-0	104269	pCAS-PPO	FALSE
271_RB_104269_pCAS-PPO	ku70	4	197	1	TRUE	5:6907289	reverse	5	6907289	RB	271	0		1	G	-1	Col-0	104269	pCAS-PPO	FALSE
271_RB_104269_pCAS-PPO	ku70	3	131	1	TRUE	5:7850511	forward	5	7850511	RB	271	0		2	TT	-18	Col-0	104269	pCAS-PPO	FALSE
271_RB_104269_pCAS-PPO	ku70	32	344	0.911765	TRUE	5:12113477	forward	5	12113477	RB	271	0		0		-23	Col-0	104269	pCAS-PPO	FALSE
271_RB_104269_pCAS-PPO	ku70	4	175	1	TRUE	5:14668289	forward	5	14668289	RB	271	15	GTTTTTTTATTTTGG	0		-19	Col-0	104269	pCAS-PPO	FALSE
271_RB_104269_pCAS-PPO	ku70	7	292	1	TRUE	5:15572457	forward	5	15572457	RB	271	26	GCGTCAATTTGTTTACACCACAATTT	0		-15	Col-0	104269	pCAS-PPO	FALSE
271_RB_104269_pCAS-PPO	ku70	5	225	0.8	TRUE	5:15572465	reverse	5	15572465	RB	271	0		1	A	0	Col-0	104269	pCAS-PPO	FALSE
271_RB_104269_pCAS-PPO	ku70	11	255	1	TRUE	5:15916672	forward	5	15916672	RB	271	0		0		-1	Col-0	104269	pCAS-PPO	FALSE
271_RB_104269_pCAS-PPO	ku70	12	268	0.833333	TRUE	5:16199197	reverse	5	16199197	RB	271	6	CAAAAT	0		-7	Col-0	104269	pCAS-PPO	FALSE
271_RB_104269_pCAS-PPO	ku70	7	306	0.857143	TRUE	5:16626378	reverse	5	16626378	RB	271	0		0		-6	Col-0	104269	pCAS-PPO	FALSE
271_RB_104269_pCAS-PPO	ku70	15	220	0.933333	TRUE	5:16866995	forward	5	16866995	RB	271	0		1	A	0	Col-0	104269	pCAS-PPO	FALSE
271_RB_104269_pCAS-PPO	ku70	7	178	0.857143	TRUE	5:17515656	reverse	5	17515656	RB	271	1	G	0		-12	Col-0	104269	pCAS-PPO	FALSE
271_RB_104269_pCAS-PPO	ku70	9	239	1	TRUE	5:18730256	forward	5	18730256	RB	271	2	TT	0		-6	Col-0	104269	pCAS-PPO	FALSE
271_RB_104269_pCAS-PPO	ku70	8	214	0.875	TRUE	5:19192475	reverse	5	19192475	RB	271	3	GTC	0		-14	Col-0	104269	pCAS-PPO	FALSE
271_RB_104269_pCAS-PPO	ku70	7	314	0.857143	TRUE	5:20744321	forward	5	20744321	RB	271	0		4	TTAA	-15	Col-0	104269	pCAS-PPO	FALSE
271_RB_104269_pCAS-PPO	ku70	14	299	1	TRUE	5:20744312	forward	5	20744312	RB	271	3	GGA	0		-12	Col-0	104269	pCAS-PPO	FALSE
271_RB_104269_pCAS-PPO	ku70	21	244	0.857143	TRUE	5:20867522	reverse	5	20867522	RB	271	0		4	TCAG	-7	Col-0	104269	pCAS-PPO	FALSE
271_RB_104269_pCAS-PPO	ku70	3	228	1	TRUE	5:21311130	forward	5	21311130	RB	271	0		4	TCAG	-20	Col-0	104269	pCAS-PPO	FALSE
271_RB_104269_pCAS-PPO	ku70	3	210	1	TRUE	5:21436206	reverse	5	21436206	RB	271	19	AAAGTACTTTAAAGTACTT	0		0	Col-0	104269	pCAS-PPO	FALSE
271_RB_104269_pCAS-PPO	ku70	13	337	0.857143	TRUE	5:21684984	reverse	5	21684984	RB	271	0		0		-6	Col-0	104269	pCAS-PPO	FALSE
271_RB_104269_pCAS-PPO	ku70	16	287	0.875	TRUE	5:22084297	reverse	5	22084297	RB	271	4	GTTT	0		-1	Col-0	104269	pCAS-PPO	FALSE
271_RB_104269_pCAS-PPO	ku70	5	189	1	TRUE	5:22201376	reverse	5	22201376	RB	271	7	TGAGGTG	0		-16	Col-0	104269	pCAS-PPO	FALSE
271_RB_104269_pCAS-PPO	ku70	9	237	0.909091	TRUE	5:22551815	reverse	5	22551815	RB	271	0		5	TTTCC	-29	Col-0	104269	pCAS-PPO	FALSE
271_RB_104269_pCAS-PPO	ku70	3	143	1	TRUE	5:22941825	reverse	5	22941825	RB	271	0		3	TGA	0	Col-0	104269	pCAS-PPO	FALSE
271_RB_104269_pCAS-PPO	ku70	10	148	0.9	TRUE	5:23187369	forward	5	23187369	RB	271	0		4	TTTG	-1	Col-0	104269	pCAS-PPO	FALSE
271_RB_104269_pCAS-PPO	ku70	3	195	1	TRUE	5:23224172	forward	5	23224172	RB	271	24	CAAAGCACTGATAGTGGTCCACAA	0		-3	Col-0	104269	pCAS-PPO	FALSE
271_RB_104269_pCAS-PPO	ku70	3	182	1	TRUE	5:23376179	forward	5	23376179	RB	271	0		3	TCA	-21	Col-0	104269	pCAS-PPO	FALSE
271_RB_104269_pCAS-PPO	ku70	6	205	1	TRUE	5:23982441	forward	5	23982441	RB	271	0		3	TGA	0	Col-0	104269	pCAS-PPO	FALSE
271_RB_104269_pCAS-PPO	ku70	14	267	0.933333	TRUE	5:24515072	reverse	5	24515072	RB	271	39	ATCGGTAACAGGATATATTGTGGTGTAAACAAATTGACG	0		-29	Col-0	104269	pCAS-PPO	FALSE
271_RB_104269_pCAS-PPO	ku70	17	238	0.947368	TRUE	5:24777421	reverse	5	24777421	RB	271	0		6	GTAAAC	-13	Col-0	104269	pCAS-PPO	FALSE
271_RB_104269_pCAS-PPO	ku70	18	189	0.954545	TRUE	5:24917579	forward	5	24917579	RB	271	0		2	CA	-21	Col-0	104269	pCAS-PPO	FALSE
271_RB_104269_pCAS-PPO	ku70	5	214	0.8	TRUE	5:25512324	reverse	5	25512324	RB	271	0		4	TTTA	-16	Col-0	104269	pCAS-PPO	FALSE
271_RB_104269_pCAS-PPO	ku70	6	249	0.833333	TRUE	5:25760386	reverse	5	25760386	RB	271	11	ACATTAAAAAC	0		-6	Col-0	104269	pCAS-PPO	FALSE
271_RB_104269_pCAS-PPO	ku70	11	289	0.909091	TRUE	5:25841982	reverse	5	25841982	RB	271	0		2	TG	-5	Col-0	104269	pCAS-PPO	FALSE
271_RB_104269_pCAS-PPO	ku70	43	198	1	TRUE	5:25892688	reverse	5	25892688	RB	271	17	TGAAATAATCACACACA	0		-6	Col-0	104269	pCAS-PPO	FALSE
271_RB_104269_pCAS-PPO	ku70	3	192	1	TRUE	5:26353938	reverse	5	26353938	RB	271	21	ATTCTCTTAGGCGTTAATTCT	0		-8	Col-0	104269	pCAS-PPO	FALSE
271_RB_104269_pCAS-PPO	ku70	6	319	1	TRUE	5:26848011	reverse	5	26848011	RB	271	11	GAGATATCATA	0		-32	Col-0	104269	pCAS-PPO	FALSE
271_RB_104269_pCAS-PPO	ku70	8	183	0.875	TRUE	5:19835031	forward	5	19835031	RB	271	56	TCAAAACTCAATTTGTTTACATTAAAAACGTCCGCAATGTGTTATTAATTTGTCTA	0		-14	Col-0	104269	pCAS-PPO	FALSE
271_RB_104269_pCAS-PPO	ku70	7	283	0.857143	TRUE	5:23640793	forward	5	23640793	RB	271	29	TTTTAATGAGCTTATGGAGGTGGTGATGA	0		0	Col-0	104269	pCAS-PPO	FALSE
271_RB_104269_pCAS-PPO	ku70	3	179	1	TRUE	5:21671581	reverse	5	21671581	RB	271	25	GCTTATAGTTTTTAAGTCTCAGCAT	0		1	Col-0	104269	pCAS-PPO	FALSE
271_RB_104269_pCAS-PPO	ku70	5	204	0.8	TRUE	5:1388707	reverse	5	1388707	RB	271	43	AAAAGCGGCTATTCCCTAGAGTTCTTCTGTCCCTTCTGTAGGT	0		0	Col-0	104269	pCAS-PPO	FALSE
271_RB_104269_pCAS-PPO	ku70	3	211	1	TRUE	5:3131976	forward	5	3131976	RB	271	50	CCGATCTCGTGCATGCGCACGAGATCCGCCGTGACACACTTCAGTTTAAA	0		2	Col-0	104269	pCAS-PPO	FALSE
271_RB_104269_pCAS-PPO	ku70	8	246	0.875	TRUE	5:26279032	forward	5	26279032	RB	271	39	ACAAAAGTAAAAGGTTCAAAAGAAACGTCCGCGACAATT	0		0	Col-0	104269	pCAS-PPO	FALSE
2c1_LB_104269_pCAS-PPO	wt	10	379	0.9	TRUE	1:342969	reverse	1	342969	LB	2C1	0		2	AC	-16	Col-0	104269	pCAS-PPO	FALSE
2c1_LB_104269_pCAS-PPO	wt	6	345	1	TRUE	1:593059	reverse	1	593059	LB	2C1	0		1	T	-46	Col-0	104269	pCAS-PPO	FALSE
2c1_LB_104269_pCAS-PPO	wt	14	230	0.928571	TRUE	1:860611	forward	1	860611	LB	2C1	0		7	TATTAAG	-40	Col-0	104269	pCAS-PPO	FALSE
2c1_LB_104269_pCAS-PPO	wt	72	628	0.930556	TRUE	1:888511	forward	1	888511	LB	2C1	1	T	0		-17	Col-0	104269	pCAS-PPO	FALSE
2c1_LB_104269_pCAS-PPO	wt	32	364	1	TRUE	1:2187701	forward	1	2187701	LB	2C1	3	ACG	0		-32	Col-0	104269	pCAS-PPO	FALSE
2c1_LB_104269_pCAS-PPO	wt	74	534	0.918919	TRUE	1:2731436	forward	1	2731436	LB	2C1	0		3	GTC	-27	Col-0	104269	pCAS-PPO	FALSE
2c1_LB_104269_pCAS-PPO	wt	54	514	0.907407	TRUE	1:2731478	reverse	1	2731478	LB	2C1	0		3	AAG	-31	Col-0	104269	pCAS-PPO	FALSE
2c1_LB_104269_pCAS-PPO	wt	5	360	0.857143	TRUE	1:2807881	reverse	1	2807881	LB	2C1	7	CTTGTGT	0		-54	Col-0	104269	pCAS-PPO	FALSE
2c1_LB_104269_pCAS-PPO	wt	3	98	1	TRUE	1:3500719	reverse	1	3500719	LB	2C1	0		5	TGTTT	-18	Col-0	104269	pCAS-PPO	FALSE
2c1_LB_104269_pCAS-PPO	wt	3	157	1	TRUE	1:3529558	reverse	1	3529558	LB	2C1	0		4	TCAA	-25	Col-0	104269	pCAS-PPO	FALSE
2c1_LB_104269_pCAS-PPO	wt	3	504	1	TRUE	1:5370119	forward	1	5370119	LB	2C1	1	A	0		-25	Col-0	104269	pCAS-PPO	FALSE
2c1_LB_104269_pCAS-PPO	wt	4	306	0.75	TRUE	1:6433632	forward	1	6433632	LB	2C1	0		4	CGTC	-27	Col-0	104269	pCAS-PPO	FALSE
2c1_LB_104269_pCAS-PPO	wt	5	198	0.8	TRUE	1:6484064	reverse	1	6484064	LB	2C1	0		2	TG	-21	Col-0	104269	pCAS-PPO	FALSE
2c1_LB_104269_pCAS-PPO	wt	3	324	1	TRUE	1:7552798	forward	1	7552798	LB	2C1	13	AAGTTAGTTTTCA	0		-40	Col-0	104269	pCAS-PPO	FALSE
2c1_LB_104269_pCAS-PPO	wt	6	438	1	TRUE	1:8257751	reverse	1	8257751	LB	2C1	0		6	ACCACA	-10	Col-0	104269	pCAS-PPO	FALSE
2c1_LB_104269_pCAS-PPO	wt	3	227	1	TRUE	1:8692942	forward	1	8692942	LB	2C1	2	AC	0		-24	Col-0	104269	pCAS-PPO	FALSE
2c1_LB_104269_pCAS-PPO	wt	6	304	0.75	TRUE	1:8798207	forward	1	8798207	LB	2C1	20	ATTAAGTTGTCTAAGCGTCA	0		-24	Col-0	104269	pCAS-PPO	FALSE
2c1_LB_104269_pCAS-PPO	wt	21	407	1	TRUE	1:9358840	forward	1	9358840	LB	2C1	0		2	AC	-14	Col-0	104269	pCAS-PPO	FALSE
2c1_LB_104269_pCAS-PPO	wt	3	124	1	TRUE	1:9880298	forward	1	9880298	LB	2C1	0		5	CACAA	-9	Col-0	104269	pCAS-PPO	FALSE
2c1_LB_104269_pCAS-PPO	wt	7	230	1	TRUE	1:10378416	reverse	1	10378416	LB	2C1	23	TATCACTGTGTTGTTAAGTCGGG	0		-32	Col-0	104269	pCAS-PPO	FALSE
2c1_LB_104269_pCAS-PPO	wt	16	358	0.9375	TRUE	1:10795916	forward	1	10795916	LB	2C1	7	TTGCGTA	0		-36	Col-0	104269	pCAS-PPO	FALSE
2c1_LB_104269_pCAS-PPO	wt	4	208	1	TRUE	1:11258712	forward	1	11258712	LB	2C1	22	TGCTAACTTCTTCAATTTTGTA	0		-43	Col-0	104269	pCAS-PPO	FALSE
2c1_LB_104269_pCAS-PPO	wt	4	597	1	TRUE	1:11794678	forward	1	11794678	LB	2C1	0		1	T	-24	Col-0	104269	pCAS-PPO	FALSE
2c1_LB_104269_pCAS-PPO	wt	6	438	0.833333	TRUE	1:12190282	forward	1	12190282	LB	2C1	8	AAGAAAGG	0		-21	Col-0	104269	pCAS-PPO	FALSE
2c1_LB_104269_pCAS-PPO	wt	4	284	1	TRUE	1:12535399	forward	1	12535399	LB	2C1	0		1	G	-21	Col-0	104269	pCAS-PPO	FALSE
2c1_LB_104269_pCAS-PPO	wt	5	215	1	TRUE	1:13339836	reverse	1	13339836	LB	2C1	0		4	TAAG	-31	Col-0	104269	pCAS-PPO	FALSE
2c1_LB_104269_pCAS-PPO	wt	4	235	1	TRUE	1:18415495	reverse	1	18415495	LB	2C1	10	GTTGTTAAGG	0		-31	Col-0	104269	pCAS-PPO	FALSE
2c1_LB_104269_pCAS-PPO	wt	5	345	0.8	TRUE	1:18517181	forward	1	18517181	LB	2C1	0		3	TCA	-26	Col-0	104269	pCAS-PPO	FALSE
2c1_LB_104269_pCAS-PPO	wt	25	296	1	TRUE	1:18579794	reverse	1	18579794	LB	2C1	0		2	AC	-14	Col-0	104269	pCAS-PPO	FALSE
2c1_LB_104269_pCAS-PPO	wt	3	283	1	TRUE	1:18756596	reverse	1	18756596	LB	2C1	0		6	TCAATT	-23	Col-0	104269	pCAS-PPO	FALSE
2c1_LB_104269_pCAS-PPO	wt	3	221	1	TRUE	1:18812529	forward	1	18812529	LB	2C1	9	GTGTTATTA	0		-24	Col-0	104269	pCAS-PPO	FALSE
2c1_LB_104269_pCAS-PPO	wt	6	261	1	TRUE	1:20217087	forward	1	20217087	LB	2C1	0		2	AT	-44	Col-0	104269	pCAS-PPO	FALSE
2c1_LB_104269_pCAS-PPO	wt	3	261	1	TRUE	1:20262498	forward	1	20262498	LB	2C1	6	CAATGG	0		-20	Col-0	104269	pCAS-PPO	FALSE
2c1_LB_104269_pCAS-PPO	wt	5	131	1	TRUE	1:20818594	forward	1	20818594	LB	2C1	1	A	0		-47	Col-0	104269	pCAS-PPO	FALSE
2c1_LB_104269_pCAS-PPO	wt	3	200	1	TRUE	1:20818589	forward	1	20818589	LB	2C1	7	AACATAT	0		-47	Col-0	104269	pCAS-PPO	FALSE
2c1_LB_104269_pCAS-PPO	wt	12	419	0.933333	TRUE	1:21371434	reverse	1	21371434	LB	2C1	0		8	TTCAGTTG	-37	Col-0	104269	pCAS-PPO	FALSE
2c1_LB_104269_pCAS-PPO	wt	7	493	1	TRUE	1:22394480	reverse	1	22394480	LB	2C1	21	CCTTTAGTTTGACGTCAACTT	0		-22	Col-0	104269	pCAS-PPO	FALSE
2c1_LB_104269_pCAS-PPO	wt	6	390	0.857143	TRUE	1:23454574	forward	1	23454574	LB	2C1	5	ATCCG	0		-38	Col-0	104269	pCAS-PPO	FALSE
2c1_LB_104269_pCAS-PPO	wt	15	245	1	TRUE	1:23579626	forward	1	23579626	LB	2C1	0		4	TTGT	-36	Col-0	104269	pCAS-PPO	FALSE
2c1_LB_104269_pCAS-PPO	wt	6	259	1	TRUE	1:23966507	forward	1	23966507	LB	2C1	3	GAT	0		-37	Col-0	104269	pCAS-PPO	FALSE
2c1_LB_104269_pCAS-PPO	wt	4	297	0.75	TRUE	1:25361466	reverse	1	25361466	LB	2C1	0		3	TGT	-20	Col-0	104269	pCAS-PPO	FALSE
2c1_LB_104269_pCAS-PPO	wt	3	223	1	TRUE	1:25433317	reverse	1	25433317	LB	2C1	14	TAGCTTTCATTAAG	0		-26	Col-0	104269	pCAS-PPO	FALSE
2c1_LB_104269_pCAS-PPO	wt	21	473	0.904762	TRUE	1:25733297	reverse	1	25733297	LB	2C1	0		2	GC	-30	Col-0	104269	pCAS-PPO	FALSE
2c1_LB_104269_pCAS-PPO	wt	7	263	1	TRUE	1:26204902	forward	1	26204902	LB	2C1	6	CATATT	0		-27	Col-0	104269	pCAS-PPO	FALSE
2c1_LB_104269_pCAS-PPO	wt	55	232	1	TRUE	1:26333285	forward	1	26333285	LB	2C1	0		1	T	-51	Col-0	104269	pCAS-PPO	FALSE
2c1_LB_104269_pCAS-PPO	wt	4	226	1	TRUE	1:26651979	reverse	1	26651979	LB	2C1	0		6	ACCACA	-10	Col-0	104269	pCAS-PPO	FALSE
2c1_LB_104269_pCAS-PPO	wt	35	579	0.944444	TRUE	1:28235674	reverse	1	28235674	LB	2C1	0		4	TTTG	-21	Col-0	104269	pCAS-PPO	FALSE
2c1_LB_104269_pCAS-PPO	wt	3	254	1	TRUE	1:28402055	reverse	1	28402055	LB	2C1	0		4	TTAT	-44	Col-0	104269	pCAS-PPO	FALSE
2c1_LB_104269_pCAS-PPO	wt	4	168	1	TRUE	1:28728039	forward	1	28728039	LB	2C1	0		4	GCAA	-52	Col-0	104269	pCAS-PPO	FALSE
2c1_LB_104269_pCAS-PPO	wt	5	493	1	TRUE	1:28737992	forward	1	28737992	LB	2C1	0		2	TG	-21	Col-0	104269	pCAS-PPO	FALSE
2c1_LB_104269_pCAS-PPO	wt	9	443	1	TRUE	1:28738034	reverse	1	28738034	LB	2C1	0		7	TTTGTTT	-18	Col-0	104269	pCAS-PPO	FALSE
2c1_LB_104269_pCAS-PPO	wt	3	400	1	TRUE	1:28750655	reverse	1	28750655	LB	2C1	0		0		-23	Col-0	104269	pCAS-PPO	FALSE
2c1_LB_104269_pCAS-PPO	wt	8	280	0.75	TRUE	1:29080393	reverse	1	29080393	LB	2C1	9	CTTAGTCAA	0		-30	Col-0	104269	pCAS-PPO	FALSE
2c1_LB_104269_pCAS-PPO	wt	12	243	1	TRUE	1:29338230	forward	1	29338230	LB	2C1	0		4	ACAA	-9	Col-0	104269	pCAS-PPO	FALSE
2c1_LB_104269_pCAS-PPO	wt	3	85	1	TRUE	1:29362992	reverse	1	29362992	LB	2C1	2	AT	0		-51	Col-0	104269	pCAS-PPO	FALSE
2c1_LB_104269_pCAS-PPO	wt	11	491	1	TRUE	1:30035767	forward	1	30035767	LB	2C1	4	TGTG	0		-41	Col-0	104269	pCAS-PPO	FALSE
2c1_LB_104269_pCAS-PPO	wt	6	237	1	TRUE	1:30158690	reverse	1	30158690	LB	2C1	0		3	GTG	-48	Col-0	104269	pCAS-PPO	FALSE
2c1_LB_104269_pCAS-PPO	wt	6	236	1	TRUE	1:30391897	forward	1	30391897	LB	2C1	0		4	GCGT	-28	Col-0	104269	pCAS-PPO	FALSE
2c1_LB_104269_pCAS-PPO	wt	3	148	1	TRUE	1:12388615	reverse	1	12388615	LB	2C1	11	TAGAGATTTTT	0		1	Col-0	104269	pCAS-PPO	FALSE
2c1_LB_104269_pCAS-PPO	wt	5	390	1	TRUE	1:4017169	forward	1	4017169	LB	2C1	2	GT	0		0	Col-0	104269	pCAS-PPO	FALSE
2c1_LB_104269_pCAS-PPO	wt	6	302	1	TRUE	1:28313296	reverse	1	28313296	LB	2C1	0		0		0	Col-0	104269	pCAS-PPO	FALSE
2c1_LB_104269_pCAS-PPO	wt	4	312	0.75	TRUE	1:1348448	forward	1	1348448	LB	2C1	13	GATAACAATTTGT	0		0	Col-0	104269	pCAS-PPO	FALSE
2c1_LB_104269_pCAS-PPO	wt	7	327	0.857143	TRUE	1:434763	reverse	1	434763	LB	2C1	2	TA	0		0	Col-0	104269	pCAS-PPO	FALSE
2c1_LB_104269_pCAS-PPO	wt	3	215	1	TRUE	1:8152604	reverse	1	8152604	LB	2C1	2	TG	0		0	Col-0	104269	pCAS-PPO	FALSE
2c1_LB_104269_pCAS-PPO	wt	27	457	0.821429	TRUE	1:7863214	reverse	1	7863214	LB	2C1	8	TTGTCCTA	0		-8	Col-0	104269	pCAS-PPO	FALSE
2c1_LB_104269_pCAS-PPO	wt	8	300	0.875	TRUE	1:26631209	forward	1	26631209	LB	2C1	16	ATATAAACTTTTGTTT	0		0	Col-0	104269	pCAS-PPO	FALSE
2c1_LB_104269_pCAS-PPO	wt	5	288	1	TRUE	1:17289765	forward	1	17289765	LB	2C1	23	TATTTAAATTATGTAGAAAAAAA	0		0	Col-0	104269	pCAS-PPO	FALSE
2c1_LB_104269_pCAS-PPO	wt	3	200	1	TRUE	1:18333923	reverse	1	18333923	LB	2C1	20	TTCAGATTATACTAGTGCCA	0		0	Col-0	104269	pCAS-PPO	FALSE
2c1_LB_104269_pCAS-PPO	wt	3	245	1	TRUE	1:8257677	forward	1	8257677	LB	2C1	0		3	CTG	0	Col-0	104269	pCAS-PPO	FALSE
2c1_LB_104269_pCAS-PPO	wt	33	555	0.848485	TRUE	1:29799187	forward	1	29799187	LB	2C1	2	TG	0		-1	Col-0	104269	pCAS-PPO	FALSE
2c1_LB_104269_pCAS-PPO	wt	5	226	1	TRUE	1:3301864	reverse	1	3301864	LB	2C1	0		4	ATCC	-2	Col-0	104269	pCAS-PPO	FALSE
2c1_LB_104269_pCAS-PPO	wt	25	338	0.84	TRUE	1:29909831	forward	1	29909831	LB	2C1	0		5	ATATC	-3	Col-0	104269	pCAS-PPO	FALSE
2c1_LB_104269_pCAS-PPO	wt	3	434	1	TRUE	1:19926294	forward	1	19926294	LB	2C1	0		3	ATC	-3	Col-0	104269	pCAS-PPO	FALSE
2c1_LB_104269_pCAS-PPO	wt	22	386	0.863636	TRUE	1:2187705	reverse	1	2187705	LB	2C1	6	TGAGTT	0		-4	Col-0	104269	pCAS-PPO	FALSE
2c1_LB_104269_pCAS-PPO	wt	4	247	1	TRUE	1:29909867	reverse	1	29909867	LB	2C1	0		5	TATAT	-4	Col-0	104269	pCAS-PPO	FALSE
2c1_LB_104269_pCAS-PPO	wt	18	431	0.888889	TRUE	1:23688990	forward	1	23688990	LB	2C1	0		5	TATAT	-4	Col-0	104269	pCAS-PPO	FALSE
2c1_LB_104269_pCAS-PPO	wt	6	313	1	TRUE	1:7552844	reverse	1	7552844	LB	2C1	0		4	ATAT	-4	Col-0	104269	pCAS-PPO	FALSE
2c1_LB_104269_pCAS-PPO	wt	8	462	0.75	TRUE	1:30035786	reverse	1	30035786	LB	2C1	3	CCG	0		-6	Col-0	104269	pCAS-PPO	FALSE
2c1_LB_104269_pCAS-PPO	wt	3	122	1	TRUE	1:18812218	reverse	1	18812218	LB	2C1	38	GAGTACAATTGCTTAGACAATGTAACAGTTGCTTTTTA	0		-5	Col-0	104269	pCAS-PPO	FALSE
2c1_LB_104269_pCAS-PPO	wt	4	263	0.75	TRUE	1:27207829	reverse	1	27207829	LB	2C1	26	GCTGTTTCCTGTATGAATTGTGGGAT	0		-5	Col-0	104269	pCAS-PPO	FALSE
2c1_LB_104269_pCAS-PPO	wt	3	235	1	TRUE	1:26693945	reverse	1	26693945	LB	2C1	0		5	AATAT	-6	Col-0	104269	pCAS-PPO	FALSE
2c1_LB_104269_pCAS-PPO	wt	7	277	1	TRUE	1:18680551	forward	1	18680551	LB	2C1	4	TGTG	0		-6	Col-0	104269	pCAS-PPO	FALSE
2c1_LB_104269_pCAS-PPO	wt	4	106	0.75	TRUE	1:10795949	reverse	1	10795949	LB	2C1	0		2	AT	-6	Col-0	104269	pCAS-PPO	FALSE
2c1_LB_104269_pCAS-PPO	wt	11	357	0.909091	TRUE	1:30391912	reverse	1	30391912	LB	2C1	0		2	AT	-6	Col-0	104269	pCAS-PPO	FALSE
2c1_LB_104269_pCAS-PPO	wt	3	346	1	TRUE	1:23867829	forward	1	23867829	LB	2C1	0		0		-6	Col-0	104269	pCAS-PPO	FALSE
2c1_LB_104269_pCAS-PPO	wt	4	150	1	TRUE	1:4170337	forward	1	4170337	LB	2C1	0		2	AT	-6	Col-0	104269	pCAS-PPO	FALSE
2c1_LB_104269_pCAS-PPO	wt	4	313	0.75	TRUE	1:8924071	reverse	1	8924071	LB	2C1	0		4	AATA	-7	Col-0	104269	pCAS-PPO	FALSE
2c1_LB_104269_pCAS-PPO	wt	13	276	1	TRUE	1:26660952	forward	1	26660952	LB	2C1	7	ACTGTAT	0		-7	Col-0	104269	pCAS-PPO	FALSE
2c1_LB_104269_pCAS-PPO	wt	9	301	1	TRUE	1:8961219	reverse	1	8961219	LB	2C1	0		1	T	-8	Col-0	104269	pCAS-PPO	FALSE
2c1_LB_104269_pCAS-PPO	wt	3	154	1	TRUE	1:10374067	forward	1	10374067	LB	2C1	39	GAATTACGTCAATGTGGAGAATGTAATATTACGTATGAA	0		-9	Col-0	104269	pCAS-PPO	FALSE
2c1_LB_104269_pCAS-PPO	wt	3	172	1	TRUE	1:6109656	forward	1	6109656	LB	2C1	0		1	A	-9	Col-0	104269	pCAS-PPO	FALSE
2c1_LB_104269_pCAS-PPO	wt	3	323	1	TRUE	1:4794489	forward	1	4794489	LB	2C1	0		2	AA	-9	Col-0	104269	pCAS-PPO	FALSE
2c1_LB_104269_pCAS-PPO	wt	4	138	0.75	TRUE	1:24154351	forward	1	24154351	LB	2C1	12	TAAACGTCCACA	0		-11	Col-0	104269	pCAS-PPO	FALSE
2c1_LB_104269_pCAS-PPO	wt	6	480	1	TRUE	1:2577774	forward	1	2577774	LB	2C1	6	GCAATG	0		-13	Col-0	104269	pCAS-PPO	FALSE
2c1_LB_104269_pCAS-PPO	wt	3	237	1	TRUE	1:27627845	reverse	1	27627845	LB	2C1	5	GATAA	0		-13	Col-0	104269	pCAS-PPO	FALSE
2c1_LB_104269_pCAS-PPO	wt	7	454	1	TRUE	2:1788401	forward	2	1788401	LB	2C1	0		6	ACACCA	-12	Col-0	104269	pCAS-PPO	FALSE
2c1_LB_104269_pCAS-PPO	wt	48	336	0.918367	TRUE	2:1990973	forward	2	1990973	LB	2C1	27	ATCAGTCTTTCAGGTGTGGATGCTAAG	0		-24	Col-0	104269	pCAS-PPO	FALSE
2c1_LB_104269_pCAS-PPO	wt	13	467	0.923077	TRUE	2:4140531	reverse	2	4140531	LB	2C1	0		5	TTTGT	-20	Col-0	104269	pCAS-PPO	FALSE
2c1_LB_104269_pCAS-PPO	wt	6	191	0.833333	TRUE	2:5875406	forward	2	5875406	LB	2C1	12	GTTGTCTAAGCG	0		-25	Col-0	104269	pCAS-PPO	FALSE
2c1_LB_104269_pCAS-PPO	wt	4	1512	1	TRUE	2:6563346	reverse	2	6563346	LB	2C1	0		3	ATT	-43	Col-0	104269	pCAS-PPO	FALSE
2c1_LB_104269_pCAS-PPO	wt	13	314	0.923077	TRUE	2:6794661	forward	2	6794661	LB	2C1	0		2	AG	-31	Col-0	104269	pCAS-PPO	FALSE
2c1_LB_104269_pCAS-PPO	wt	3	216	1	TRUE	2:7919335	reverse	2	7919335	LB	2C1	0		6	TTGTCT	-34	Col-0	104269	pCAS-PPO	FALSE
2c1_LB_104269_pCAS-PPO	wt	6	702	0.833333	TRUE	2:8059083	reverse	2	8059083	LB	2C1	0		5	CCACA	-10	Col-0	104269	pCAS-PPO	FALSE
2c1_LB_104269_pCAS-PPO	wt	4	591	1	TRUE	2:8102733	forward	2	8102733	LB	2C1	0		7	GTGTCAA	-25	Col-0	104269	pCAS-PPO	FALSE
2c1_LB_104269_pCAS-PPO	wt	12	432	1	TRUE	2:8113458	reverse	2	8113458	LB	2C1	14	GTGCTAGAGCAACT	0		-24	Col-0	104269	pCAS-PPO	FALSE
2c1_LB_104269_pCAS-PPO	wt	3	422	1	TRUE	2:9006540	reverse	2	9006540	LB	2C1	0		2	AA	-32	Col-0	104269	pCAS-PPO	FALSE
2c1_LB_104269_pCAS-PPO	wt	3	396	1	TRUE	2:9292719	reverse	2	9292719	LB	2C1	4	ACGA	0		-21	Col-0	104269	pCAS-PPO	FALSE
2c1_LB_104269_pCAS-PPO	wt	18	350	1	TRUE	2:10867113	reverse	2	10867113	LB	2C1	0		4	ACAA	-9	Col-0	104269	pCAS-PPO	FALSE
2c1_LB_104269_pCAS-PPO	wt	17	302	1	TRUE	2:12076942	forward	2	12076942	LB	2C1	12	CGGGGAACGGCA	0		-23	Col-0	104269	pCAS-PPO	FALSE
2c1_LB_104269_pCAS-PPO	wt	9	299	0.909091	TRUE	2:12693253	reverse	2	12693253	LB	2C1	0		0		-38	Col-0	104269	pCAS-PPO	FALSE
2c1_LB_104269_pCAS-PPO	wt	5	193	0.8	TRUE	2:13105560	forward	2	13105560	LB	2C1	9	GTGTTATAT	0		-24	Col-0	104269	pCAS-PPO	FALSE
2c1_LB_104269_pCAS-PPO	wt	4	314	0.75	TRUE	2:13105575	reverse	2	13105575	LB	2C1	0		0		-42	Col-0	104269	pCAS-PPO	FALSE
2c1_LB_104269_pCAS-PPO	wt	4	121	1	TRUE	2:13286474	forward	2	13286474	LB	2C1	0		0		-35	Col-0	104269	pCAS-PPO	FALSE
2c1_LB_104269_pCAS-PPO	wt	4	357	1	TRUE	2:13781754	forward	2	13781754	LB	2C1	0		5	ATTTG	-21	Col-0	104269	pCAS-PPO	FALSE
2c1_LB_104269_pCAS-PPO	wt	4	238	1	TRUE	2:13988919	forward	2	13988919	LB	2C1	0		1	T	-49	Col-0	104269	pCAS-PPO	FALSE
2c1_LB_104269_pCAS-PPO	wt	29	407	0.896552	TRUE	2:14123575	forward	2	14123575	LB	2C1	0		2	AC	-14	Col-0	104269	pCAS-PPO	FALSE
2c1_LB_104269_pCAS-PPO	wt	22	415	0.826087	TRUE	2:14325379	forward	2	14325379	LB	2C1	26	GCTTAACTGGCCCATCTATATATAGT	0		-33	Col-0	104269	pCAS-PPO	FALSE
2c1_LB_104269_pCAS-PPO	wt	30	457	0.935484	TRUE	2:14426968	forward	2	14426968	LB	2C1	12	ATATCAATGTGT	0		-51	Col-0	104269	pCAS-PPO	FALSE
2c1_LB_104269_pCAS-PPO	wt	3	454	1	TRUE	2:15059374	forward	2	15059374	LB	2C1	0		9	GCAATGTGT	-47	Col-0	104269	pCAS-PPO	FALSE
2c1_LB_104269_pCAS-PPO	wt	17	482	0.966667	TRUE	2:15483947	forward	2	15483947	LB	2C1	0		5	GTGTT	-46	Col-0	104269	pCAS-PPO	FALSE
2c1_LB_104269_pCAS-PPO	wt	6	278	1	TRUE	2:15692516	reverse	2	15692516	LB	2C1	0		8	TCAATTTG	-21	Col-0	104269	pCAS-PPO	FALSE
2c1_LB_104269_pCAS-PPO	wt	3	284	1	TRUE	2:15712264	forward	2	15712264	LB	2C1	0		2	AT	-44	Col-0	104269	pCAS-PPO	FALSE
2c1_LB_104269_pCAS-PPO	wt	19	477	1	TRUE	2:15952572	reverse	2	15952572	LB	2C1	0		8	GTTAATTT	-22	Col-0	104269	pCAS-PPO	FALSE
2c1_LB_104269_pCAS-PPO	wt	28	523	0.857143	TRUE	2:16375796	reverse	2	16375796	LB	2C1	0		2	AT	-8	Col-0	104269	pCAS-PPO	FALSE
2c1_LB_104269_pCAS-PPO	wt	24	435	1	TRUE	2:16560042	forward	2	16560042	LB	2C1	0		1	G	-31	Col-0	104269	pCAS-PPO	FALSE
2c1_LB_104269_pCAS-PPO	wt	3	470	1	TRUE	2:16592064	reverse	2	16592064	LB	2C1	0		6	GCAATG	-50	Col-0	104269	pCAS-PPO	FALSE
2c1_LB_104269_pCAS-PPO	wt	3	128	1	TRUE	2:16940832	forward	2	16940832	LB	2C1	6	CGTATT	0		-21	Col-0	104269	pCAS-PPO	FALSE
2c1_LB_104269_pCAS-PPO	wt	3	168	1	TRUE	2:17772553	forward	2	17772553	LB	2C1	0		1	A	-12	Col-0	104269	pCAS-PPO	FALSE
2c1_LB_104269_pCAS-PPO	wt	7	341	0.857143	TRUE	2:17853405	forward	2	17853405	LB	2C1	11	CAAGTTGTACA	0		-22	Col-0	104269	pCAS-PPO	FALSE
2c1_LB_104269_pCAS-PPO	wt	9	546	0.888889	TRUE	2:17853411	reverse	2	17853411	LB	2C1	14	CTAAACGGACAATT	0		-22	Col-0	104269	pCAS-PPO	FALSE
2c1_LB_104269_pCAS-PPO	wt	4	222	0.857143	TRUE	2:17877204	forward	2	17877204	LB	2C1	4	AGTG	0		-3	Col-0	104269	pCAS-PPO	FALSE
2c1_LB_104269_pCAS-PPO	wt	13	368	0.846154	TRUE	2:17899680	reverse	2	17899680	LB	2C1	0		4	ATTT	-22	Col-0	104269	pCAS-PPO	FALSE
2c1_LB_104269_pCAS-PPO	wt	4	347	1	TRUE	2:17971495	forward	2	17971495	LB	2C1	0		4	TTAT	-44	Col-0	104269	pCAS-PPO	FALSE
2c1_LB_104269_pCAS-PPO	wt	7	263	1	TRUE	2:18494686	reverse	2	18494686	LB	2C1	7	ATCAATG	0		-38	Col-0	104269	pCAS-PPO	FALSE
2c1_LB_104269_pCAS-PPO	wt	6	445	1	TRUE	2:18580106	reverse	2	18580106	LB	2C1	9	CGTCAAGTT	0		-32	Col-0	104269	pCAS-PPO	FALSE
2c1_LB_104269_pCAS-PPO	wt	22	301	1	TRUE	2:19289198	forward	2	19289198	LB	2C1	0		2	TT	-19	Col-0	104269	pCAS-PPO	FALSE
2c1_LB_104269_pCAS-PPO	wt	29	485	0.827586	TRUE	2:14100238	forward	2	14100238	LB	2C1	1	T	0		1	Col-0	104269	pCAS-PPO	FALSE
2c1_LB_104269_pCAS-PPO	wt	9	447	0.888889	TRUE	2:4140521	forward	2	4140521	LB	2C1	0		6	TCCTGC	1	Col-0	104269	pCAS-PPO	FALSE
2c1_LB_104269_pCAS-PPO	wt	11	514	0.818182	TRUE	2:16194251	reverse	2	16194251	LB	2C1	25	TATTTAATTAAGATCTCAGATTCTG	0		0	Col-0	104269	pCAS-PPO	FALSE
2c1_LB_104269_pCAS-PPO	wt	4	372	0.75	TRUE	2:7511908	reverse	2	7511908	LB	2C1	0		4	CCTG	0	Col-0	104269	pCAS-PPO	FALSE
2c1_LB_104269_pCAS-PPO	wt	12	240	0.75	TRUE	2:6758752	reverse	2	6758752	LB	2C1	15	TATTTTTGTTCTGTT	0		0	Col-0	104269	pCAS-PPO	FALSE
2c1_LB_104269_pCAS-PPO	wt	4	410	1	TRUE	2:16378253	forward	2	16378253	LB	2C1	0		3	CTG	0	Col-0	104269	pCAS-PPO	FALSE
2c1_LB_104269_pCAS-PPO	wt	6	366	1	TRUE	2:13081150	forward	2	13081150	LB	2C1	7	TAATTTT	0		0	Col-0	104269	pCAS-PPO	FALSE
2c1_LB_104269_pCAS-PPO	wt	4	430	1	TRUE	2:16328193	forward	2	16328193	LB	2C1	8	ATGTATTG	0		0	Col-0	104269	pCAS-PPO	FALSE
2c1_LB_104269_pCAS-PPO	wt	5	341	0.8	TRUE	2:15613379	reverse	2	15613379	LB	2C1	0		3	CTG	0	Col-0	104269	pCAS-PPO	FALSE
2c1_LB_104269_pCAS-PPO	wt	5	325	0.8	TRUE	2:7168060	forward	2	7168060	LB	2C1	2	AA	0		0	Col-0	104269	pCAS-PPO	FALSE
2c1_LB_104269_pCAS-PPO	wt	9	375	1	TRUE	2:15613372	reverse	2	15613372	LB	2C1	0		5	ATATC	-3	Col-0	104269	pCAS-PPO	FALSE
2c1_LB_104269_pCAS-PPO	wt	6	586	0.833333	TRUE	2:14029366	reverse	2	14029366	LB	2C1	1	A	0		-3	Col-0	104269	pCAS-PPO	FALSE
2c1_LB_104269_pCAS-PPO	wt	28	402	0.964286	TRUE	2:18974538	forward	2	18974538	LB	2C1	31	GCTTAAATAGTTTACACCACTATCGTGTTTC	0		-4	Col-0	104269	pCAS-PPO	FALSE
2c1_LB_104269_pCAS-PPO	wt	14	306	0.866667	TRUE	2:552780	reverse	2	552780	LB	2C1	0		1	T	-4	Col-0	104269	pCAS-PPO	FALSE
2c1_LB_104269_pCAS-PPO	wt	4	384	1	TRUE	2:12978998	forward	2	12978998	LB	2C1	2	TA	0		-4	Col-0	104269	pCAS-PPO	FALSE
2c1_LB_104269_pCAS-PPO	wt	4	236	1	TRUE	2:19188591	forward	2	19188591	LB	2C1	0		0		-4	Col-0	104269	pCAS-PPO	FALSE
2c1_LB_104269_pCAS-PPO	wt	13	340	0.846154	TRUE	2:16696700	forward	2	16696700	LB	2C1	0		6	AATATA	-5	Col-0	104269	pCAS-PPO	FALSE
2c1_LB_104269_pCAS-PPO	wt	7	422	1	TRUE	2:17718740	reverse	2	17718740	LB	2C1	0		10	CCACAATATA	-5	Col-0	104269	pCAS-PPO	FALSE
2c1_LB_104269_pCAS-PPO	wt	37	400	0.918919	TRUE	2:602627	forward	2	602627	LB	2C1	0		3	TAT	-6	Col-0	104269	pCAS-PPO	FALSE
2c1_LB_104269_pCAS-PPO	wt	21	361	0.904762	TRUE	2:16376778	forward	2	16376778	LB	2C1	17	TGTGGTCTAAGCGTCAA	0		-6	Col-0	104269	pCAS-PPO	FALSE
2c1_LB_104269_pCAS-PPO	wt	7	254	1	TRUE	2:12307658	reverse	2	12307658	LB	2C1	0		1	T	-6	Col-0	104269	pCAS-PPO	FALSE
2c1_LB_104269_pCAS-PPO	wt	4	193	1	TRUE	2:17899689	forward	2	17899689	LB	2C1	8	TATTTGTT	0		-6	Col-0	104269	pCAS-PPO	FALSE
2c1_LB_104269_pCAS-PPO	wt	3	218	1	TRUE	2:17444903	forward	2	17444903	LB	2C1	25	TGGCTAGAGCAATTCGGCGTTAGTT	0		-8	Col-0	104269	pCAS-PPO	FALSE
2c1_LB_104269_pCAS-PPO	wt	3	189	1	TRUE	2:2846117	forward	2	2846117	LB	2C1	22	TCAGGATATATTGGTCTAGTTT	0		-8	Col-0	104269	pCAS-PPO	FALSE
2c1_LB_104269_pCAS-PPO	wt	23	309	0.956522	TRUE	2:14123609	reverse	2	14123609	LB	2C1	30	CACAATTTGTCCACTTAGACAAAATCTCCT	0		-9	Col-0	104269	pCAS-PPO	FALSE
2c1_LB_104269_pCAS-PPO	wt	22	351	0.909091	TRUE	2:18961215	forward	2	18961215	LB	2C1	0		1	A	-9	Col-0	104269	pCAS-PPO	FALSE
2c1_LB_104269_pCAS-PPO	wt	3	216	1	TRUE	2:8676086	reverse	2	8676086	LB	2C1	0		3	CAA	-9	Col-0	104269	pCAS-PPO	FALSE
2c1_LB_104269_pCAS-PPO	wt	3	221	1	TRUE	2:85161	reverse	2	85161	LB	2C1	0		1	A	-10	Col-0	104269	pCAS-PPO	FALSE
2c1_LB_104269_pCAS-PPO	wt	40	452	0.975	TRUE	2:18974552	reverse	2	18974552	LB	2C1	23	AATAGTGTGGTGTAAATAGTGAG	0		-14	Col-0	104269	pCAS-PPO	FALSE
2c1_LB_104269_pCAS-PPO	wt	23	294	0.956522	TRUE	3:12900	forward	3	12900	LB	2C1	0		4	TTGT	-36	Col-0	104269	pCAS-PPO	FALSE
2c1_LB_104269_pCAS-PPO	wt	7	259	0.857143	TRUE	3:259757	forward	3	259757	LB	2C1	0		6	ATTTGT	-20	Col-0	104269	pCAS-PPO	FALSE
2c1_LB_104269_pCAS-PPO	wt	7	406	1	TRUE	3:259786	reverse	3	259786	LB	2C1	3	ATT	0		-38	Col-0	104269	pCAS-PPO	FALSE
2c1_LB_104269_pCAS-PPO	wt	12	321	0.833333	TRUE	3:506684	reverse	3	506684	LB	2C1	0		2	CA	-15	Col-0	104269	pCAS-PPO	FALSE
2c1_LB_104269_pCAS-PPO	wt	3	439	1	TRUE	3:919049	reverse	3	919049	LB	2C1	0		3	AGT	-39	Col-0	104269	pCAS-PPO	FALSE
2c1_LB_104269_pCAS-PPO	wt	97	734	0.908163	TRUE	3:1282218	forward	3	1282218	LB	2C1	0		4	TCAA	-25	Col-0	104269	pCAS-PPO	FALSE
2c1_LB_104269_pCAS-PPO	wt	13	311	0.769231	TRUE	3:1635020	reverse	3	1635020	LB	2C1	1	C	0		-19	Col-0	104269	pCAS-PPO	FALSE
2c1_LB_104269_pCAS-PPO	wt	5	245	1	TRUE	3:1676342	reverse	3	1676342	LB	2C1	0		2	TT	-43	Col-0	104269	pCAS-PPO	FALSE
2c1_LB_104269_pCAS-PPO	wt	7	317	1	TRUE	3:1683767	forward	3	1683767	LB	2C1	0		2	GT	-28	Col-0	104269	pCAS-PPO	FALSE
2c1_LB_104269_pCAS-PPO	wt	10	192	0.9	TRUE	3:1760307	forward	3	1760307	LB	2C1	0		4	AAGC	-30	Col-0	104269	pCAS-PPO	FALSE
2c1_LB_104269_pCAS-PPO	wt	7	315	1	TRUE	3:2383183	forward	3	2383183	LB	2C1	0		1	T	-23	Col-0	104269	pCAS-PPO	FALSE
2c1_LB_104269_pCAS-PPO	wt	6	227	0.833333	TRUE	3:2383207	reverse	3	2383207	LB	2C1	3	TTT	0		-41	Col-0	104269	pCAS-PPO	FALSE
2c1_LB_104269_pCAS-PPO	wt	3	384	1	TRUE	3:2732968	forward	3	2732968	LB	2C1	0		5	AATTT	-22	Col-0	104269	pCAS-PPO	FALSE
2c1_LB_104269_pCAS-PPO	wt	5	179	0.8	TRUE	3:3254399	reverse	3	3254399	LB	2C1	0		4	ACAA	-9	Col-0	104269	pCAS-PPO	FALSE
2c1_LB_104269_pCAS-PPO	wt	3	186	1	TRUE	3:3254604	forward	3	3254604	LB	2C1	0		4	TTTG	-21	Col-0	104269	pCAS-PPO	FALSE
2c1_LB_104269_pCAS-PPO	wt	3	168	1	TRUE	3:3412720	forward	3	3412720	LB	2C1	0		6	TCTAAG	-31	Col-0	104269	pCAS-PPO	FALSE
2c1_LB_104269_pCAS-PPO	wt	6	505	1	TRUE	3:3412758	reverse	3	3412758	LB	2C1	0		4	TCAA	-25	Col-0	104269	pCAS-PPO	FALSE
2c1_LB_104269_pCAS-PPO	wt	4	181	1	TRUE	3:3628204	forward	3	3628204	LB	2C1	0		4	ATTA	-42	Col-0	104269	pCAS-PPO	FALSE
2c1_LB_104269_pCAS-PPO	wt	33	496	1	TRUE	3:3874631	reverse	3	3874631	LB	2C1	0		3	TTA	-42	Col-0	104269	pCAS-PPO	FALSE
2c1_LB_104269_pCAS-PPO	wt	7	346	1	TRUE	3:3981711	reverse	3	3981711	LB	2C1	1	A	0		-19	Col-0	104269	pCAS-PPO	FALSE
2c1_LB_104269_pCAS-PPO	wt	3	162	1	TRUE	3:4463685	reverse	3	4463685	LB	2C1	0		2	TG	-21	Col-0	104269	pCAS-PPO	FALSE
2c1_LB_104269_pCAS-PPO	wt	3	237	1	TRUE	3:5419558	forward	3	5419558	LB	2C1	4	ATTA	0		-41	Col-0	104269	pCAS-PPO	FALSE
2c1_LB_104269_pCAS-PPO	wt	9	426	0.777778	TRUE	3:5952175	forward	3	5952175	LB	2C1	0		3	TAA	-32	Col-0	104269	pCAS-PPO	FALSE
2c1_LB_104269_pCAS-PPO	wt	10	259	1	TRUE	3:6462847	reverse	3	6462847	LB	2C1	0		2	GC	-30	Col-0	104269	pCAS-PPO	FALSE
2c1_LB_104269_pCAS-PPO	wt	142	568	0.937063	TRUE	3:7063441	forward	3	7063441	LB	2C1	0		4	TTGT	-20	Col-0	104269	pCAS-PPO	FALSE
2c1_LB_104269_pCAS-PPO	wt	3	198	1	TRUE	3:7317870	forward	3	7317870	LB	2C1	0		4	TCAA	-25	Col-0	104269	pCAS-PPO	FALSE
2c1_LB_104269_pCAS-PPO	wt	4	176	1	TRUE	3:7317898	reverse	3	7317898	LB	2C1	0		1	T	-51	Col-0	104269	pCAS-PPO	FALSE
2c1_LB_104269_pCAS-PPO	wt	7	320	1	TRUE	3:7772482	forward	3	7772482	LB	2C1	0		5	TGTTT	-18	Col-0	104269	pCAS-PPO	FALSE
2c1_LB_104269_pCAS-PPO	wt	13	272	1	TRUE	3:8640325	reverse	3	8640325	LB	2C1	0		8	ACTCCACA	-10	Col-0	104269	pCAS-PPO	FALSE
2c1_LB_104269_pCAS-PPO	wt	4	168	0.75	TRUE	3:8918522	forward	3	8918522	LB	2C1	19	CACCGCAATGTGTTATTAA	0		-19	Col-0	104269	pCAS-PPO	FALSE
2c1_LB_104269_pCAS-PPO	wt	5	312	1	TRUE	3:9497812	forward	3	9497812	LB	2C1	0		5	CCACA	-10	Col-0	104269	pCAS-PPO	FALSE
2c1_LB_104269_pCAS-PPO	wt	10	429	0.8	TRUE	3:9590736	reverse	3	9590736	LB	2C1	0		7	GAATATA	-5	Col-0	104269	pCAS-PPO	FALSE
2c1_LB_104269_pCAS-PPO	wt	3	185	1	TRUE	3:10187841	reverse	3	10187841	LB	2C1	0		1	A	-25	Col-0	104269	pCAS-PPO	FALSE
2c1_LB_104269_pCAS-PPO	wt	14	319	1	TRUE	3:11236896	forward	3	11236896	LB	2C1	0		3	TTA	-42	Col-0	104269	pCAS-PPO	FALSE
2c1_LB_104269_pCAS-PPO	wt	5	390	0.8	TRUE	3:11279032	reverse	3	11279032	LB	2C1	0		1	T	-20	Col-0	104269	pCAS-PPO	FALSE
2c1_LB_104269_pCAS-PPO	wt	4	158	0.75	TRUE	3:17319701	reverse	3	17319701	LB	2C1	0		4	ATTT	-22	Col-0	104269	pCAS-PPO	FALSE
2c1_LB_104269_pCAS-PPO	wt	8	268	1	TRUE	3:18154200	forward	3	18154200	LB	2C1	0		4	TCAA	-25	Col-0	104269	pCAS-PPO	FALSE
2c1_LB_104269_pCAS-PPO	wt	5	249	1	TRUE	3:18208599	reverse	3	18208599	LB	2C1	0		1	T	-51	Col-0	104269	pCAS-PPO	FALSE
2c1_LB_104269_pCAS-PPO	wt	4	181	1	TRUE	3:18285199	reverse	3	18285199	LB	2C1	0		4	CAAT	-24	Col-0	104269	pCAS-PPO	FALSE
2c1_LB_104269_pCAS-PPO	wt	4	289	1	TRUE	3:18340776	forward	3	18340776	LB	2C1	0		3	GTG	-48	Col-0	104269	pCAS-PPO	FALSE
2c1_LB_104269_pCAS-PPO	wt	5	293	1	TRUE	3:18340874	reverse	3	18340874	LB	2C1	0		2	TG	-37	Col-0	104269	pCAS-PPO	FALSE
2c1_LB_104269_pCAS-PPO	wt	6	298	0.833333	TRUE	3:18563135	reverse	3	18563135	LB	2C1	0		3	CAA	-9	Col-0	104269	pCAS-PPO	FALSE
2c1_LB_104269_pCAS-PPO	wt	4	491	1	TRUE	3:18802342	reverse	3	18802342	LB	2C1	47	AGGCGGTTTGCGTATTGGCTAGAGCAATTCGGCGTTAATTCAGTACA	0		-50	Col-0	104269	pCAS-PPO	FALSE
2c1_LB_104269_pCAS-PPO	wt	22	565	1	TRUE	3:19025213	reverse	3	19025213	LB	2C1	0		1	A	-26	Col-0	104269	pCAS-PPO	FALSE
2c1_LB_104269_pCAS-PPO	wt	4	354	1	TRUE	3:19230704	forward	3	19230704	LB	2C1	0		0		-37	Col-0	104269	pCAS-PPO	FALSE
2c1_LB_104269_pCAS-PPO	wt	3	208	1	TRUE	3:20197806	reverse	3	20197806	LB	2C1	0		5	CGCAA	-52	Col-0	104269	pCAS-PPO	FALSE
2c1_LB_104269_pCAS-PPO	wt	3	340	0.75	TRUE	3:20505347	forward	3	20505347	LB	2C1	0		5	TTACA	-15	Col-0	104269	pCAS-PPO	FALSE
2c1_LB_104269_pCAS-PPO	wt	14	363	0.928571	TRUE	3:20893813	forward	3	20893813	LB	2C1	0		5	TTATT	-43	Col-0	104269	pCAS-PPO	FALSE
2c1_LB_104269_pCAS-PPO	wt	4	174	1	TRUE	3:21231912	reverse	3	21231912	LB	2C1	0		3	GTC	-35	Col-0	104269	pCAS-PPO	FALSE
2c1_LB_104269_pCAS-PPO	wt	54	391	0.888889	TRUE	3:21293807	reverse	3	21293807	LB	2C1	0		4	TACA	-15	Col-0	104269	pCAS-PPO	FALSE
2c1_LB_104269_pCAS-PPO	wt	12	370	1	TRUE	3:21353394	forward	3	21353394	LB	2C1	0		7	AATTTGT	-20	Col-0	104269	pCAS-PPO	FALSE
2c1_LB_104269_pCAS-PPO	wt	4	428	1	TRUE	3:21707900	forward	3	21707900	LB	2C1	0		4	TTAC	-16	Col-0	104269	pCAS-PPO	FALSE
2c1_LB_104269_pCAS-PPO	wt	6	293	0.833333	TRUE	3:21707969	reverse	3	21707969	LB	2C1	13	GACCTGGGTTTAG	0		-26	Col-0	104269	pCAS-PPO	FALSE
2c1_LB_104269_pCAS-PPO	wt	4	138	1	TRUE	3:22396708	reverse	3	22396708	LB	2C1	0		4	TTTG	-21	Col-0	104269	pCAS-PPO	FALSE
2c1_LB_104269_pCAS-PPO	wt	4	108	1	TRUE	3:22460034	forward	3	22460034	LB	2C1	0		2	TT	-23	Col-0	104269	pCAS-PPO	FALSE
2c1_LB_104269_pCAS-PPO	wt	4	386	0.75	TRUE	3:22872009	reverse	3	22872009	LB	2C1	0		6	CACCAC	-11	Col-0	104269	pCAS-PPO	FALSE
2c1_LB_104269_pCAS-PPO	wt	13	261	0.923077	TRUE	3:22996708	forward	3	22996708	LB	2C1	0		6	AATTTG	-21	Col-0	104269	pCAS-PPO	FALSE
2c1_LB_104269_pCAS-PPO	wt	5	289	0.8	TRUE	3:23419967	forward	3	23419967	LB	2C1	0		4	TGTT	-19	Col-0	104269	pCAS-PPO	FALSE
2c1_LB_104269_pCAS-PPO	wt	11	506	0.818182	TRUE	3:10099796	reverse	3	10099796	LB	2C1	0		1	G	0	Col-0	104269	pCAS-PPO	FALSE
2c1_LB_104269_pCAS-PPO	wt	72	437	0.875	TRUE	3:19805504	forward	3	19805504	LB	2C1	0		0		0	Col-0	104269	pCAS-PPO	FALSE
2c1_LB_104269_pCAS-PPO	wt	20	371	0.95	TRUE	3:2029216	reverse	3	2029216	LB	2C1	0		2	TG	0	Col-0	104269	pCAS-PPO	FALSE
2c1_LB_104269_pCAS-PPO	wt	3	172	1	TRUE	3:6524342	reverse	3	6524342	LB	2C1	0		3	CTG	0	Col-0	104269	pCAS-PPO	FALSE
2c1_LB_104269_pCAS-PPO	wt	14	397	0.857143	TRUE	3:17507833	reverse	3	17507833	LB	2C1	3	AAT	0		0	Col-0	104269	pCAS-PPO	FALSE
2c1_LB_104269_pCAS-PPO	wt	6	303	1	TRUE	3:15995805	forward	3	15995805	LB	2C1	2	AA	0		0	Col-0	104269	pCAS-PPO	FALSE
2c1_LB_104269_pCAS-PPO	wt	11	279	0.909091	TRUE	3:3586448	forward	3	3586448	LB	2C1	0		1	G	0	Col-0	104269	pCAS-PPO	FALSE
2c1_LB_104269_pCAS-PPO	wt	3	201	1	TRUE	3:21523437	reverse	3	21523437	LB	2C1	0		3	CTG	0	Col-0	104269	pCAS-PPO	FALSE
2c1_LB_104269_pCAS-PPO	wt	4	124	1	TRUE	3:1024491	forward	3	1024491	LB	2C1	0		4	CCTG	0	Col-0	104269	pCAS-PPO	FALSE
2c1_LB_104269_pCAS-PPO	wt	3	375	1	TRUE	3:17761282	reverse	3	17761282	LB	2C1	9	GCACTATAC	0		0	Col-0	104269	pCAS-PPO	FALSE
2c1_LB_104269_pCAS-PPO	wt	6	391	1	TRUE	3:6462845	forward	3	6462845	LB	2C1	1	T	0		0	Col-0	104269	pCAS-PPO	FALSE
2c1_LB_104269_pCAS-PPO	wt	3	329	1	TRUE	3:20027130	reverse	3	20027130	LB	2C1	5	TGCGT	0		0	Col-0	104269	pCAS-PPO	FALSE
2c1_LB_104269_pCAS-PPO	wt	3	174	1	TRUE	3:6805485	reverse	3	6805485	LB	2C1	0		3	CTG	0	Col-0	104269	pCAS-PPO	FALSE
2c1_LB_104269_pCAS-PPO	wt	5	480	0.8	TRUE	3:11761017	reverse	3	11761017	LB	2C1	5	CAGCT	0		-1	Col-0	104269	pCAS-PPO	FALSE
2c1_LB_104269_pCAS-PPO	wt	12	475	0.916667	TRUE	3:21523543	reverse	3	21523543	LB	2C1	0		3	ATC	-3	Col-0	104269	pCAS-PPO	FALSE
2c1_LB_104269_pCAS-PPO	wt	11	266	0.909091	TRUE	3:10349665	reverse	3	10349665	LB	2C1	0		2	AT	-4	Col-0	104269	pCAS-PPO	FALSE
2c1_LB_104269_pCAS-PPO	wt	5	223	1	TRUE	3:17319698	forward	3	17319698	LB	2C1	4	AATG	0		-5	Col-0	104269	pCAS-PPO	FALSE
2c1_LB_104269_pCAS-PPO	wt	8	239	0.875	TRUE	3:22990701	reverse	3	22990701	LB	2C1	0		3	TAT	-6	Col-0	104269	pCAS-PPO	FALSE
2c1_LB_104269_pCAS-PPO	wt	3	176	1	TRUE	3:21679019	forward	3	21679019	LB	2C1	17	TGACGCTTAGACAACTT	0		-6	Col-0	104269	pCAS-PPO	FALSE
2c1_LB_104269_pCAS-PPO	wt	14	318	0.785714	TRUE	3:8640202	forward	3	8640202	LB	2C1	0		2	AT	-6	Col-0	104269	pCAS-PPO	FALSE
2c1_LB_104269_pCAS-PPO	wt	9	303	1	TRUE	3:3981678	forward	3	3981678	LB	2C1	0		7	ACAATAT	-6	Col-0	104269	pCAS-PPO	FALSE
2c1_LB_104269_pCAS-PPO	wt	3	238	1	TRUE	3:1428692	reverse	3	1428692	LB	2C1	12	TGATAAATATTA	0		-6	Col-0	104269	pCAS-PPO	FALSE
2c1_LB_104269_pCAS-PPO	wt	14	250	0.857143	TRUE	3:2029208	reverse	3	2029208	LB	2C1	0		2	AT	-8	Col-0	104269	pCAS-PPO	FALSE
2c1_LB_104269_pCAS-PPO	wt	6	479	1	TRUE	3:22325966	forward	3	22325966	LB	2C1	4	GTGT	0		-8	Col-0	104269	pCAS-PPO	FALSE
2c1_LB_104269_pCAS-PPO	wt	16	256	0.9375	TRUE	3:19983571	forward	3	19983571	LB	2C1	2	TC	0		-8	Col-0	104269	pCAS-PPO	FALSE
2c1_LB_104269_pCAS-PPO	wt	4	152	1	TRUE	3:3409570	reverse	3	3409570	LB	2C1	0		5	ACAAT	-8	Col-0	104269	pCAS-PPO	FALSE
2c1_LB_104269_pCAS-PPO	wt	6	268	1	TRUE	3:4910303	reverse	3	4910303	LB	2C1	0		3	AAT	-8	Col-0	104269	pCAS-PPO	FALSE
2c1_LB_104269_pCAS-PPO	wt	3	234	1	TRUE	3:851712	forward	3	851712	LB	2C1	4	TTGT	0		-8	Col-0	104269	pCAS-PPO	FALSE
2c1_LB_104269_pCAS-PPO	wt	3	251	1	TRUE	3:19861055	forward	3	19861055	LB	2C1	2	CA	0		-8	Col-0	104269	pCAS-PPO	FALSE
2c1_LB_104269_pCAS-PPO	wt	9	514	1	TRUE	3:9469735	reverse	3	9469735	LB	2C1	0		3	CAA	-9	Col-0	104269	pCAS-PPO	FALSE
2c1_LB_104269_pCAS-PPO	wt	4	404	0.75	TRUE	3:6718208	reverse	3	6718208	LB	2C1	0		3	CAA	-9	Col-0	104269	pCAS-PPO	FALSE
2c1_LB_104269_pCAS-PPO	wt	5	334	1	TRUE	3:7160874	forward	3	7160874	LB	2C1	0		0		-9	Col-0	104269	pCAS-PPO	FALSE
2c1_LB_104269_pCAS-PPO	wt	16	497	1	TRUE	3:16425939	forward	3	16425939	LB	2C1	8	TTGACATA	0		-12	Col-0	104269	pCAS-PPO	FALSE
2c1_LB_104269_pCAS-PPO	wt	4	250	0.75	TRUE	3:19025207	forward	3	19025207	LB	2C1	6	GCAATT	0		-13	Col-0	104269	pCAS-PPO	FALSE
2c1_LB_104269_pCAS-PPO	wt	3	149	1	TRUE	3:5766876	reverse	3	5766876	LB	2C1	14	AACGTCCGCCTTCA	0		-15	Col-0	104269	pCAS-PPO	FALSE
2c1_LB_104269_pCAS-PPO	wt	6	198	1	TRUE	3:17503333	reverse	3	17503333	LB	2C1	11	ATATTGTGGTG	0		-15	Col-0	104269	pCAS-PPO	FALSE
2c1_LB_104269_pCAS-PPO	wt	3	231	1	TRUE	3:4403259	forward	3	4403259	LB	2C1	25	TTGAGTTTATGGTACATTAAAAGAC	0		-22	Col-0	104269	pCAS-PPO	FALSE
2c1_LB_104269_pCAS-PPO	wt	3	118	1	TRUE	3:663613	forward	3	663613	LB	2C1	28	GGTTGTTCATTATTGGTATAAATCTTTG	0		-23	Col-0	104269	pCAS-PPO	FALSE
2c1_LB_104269_pCAS-PPO	wt	10	273	0.9	TRUE	Pt:113739	forward	Pt	113739	LB	2C1	0		0		0	Col-0	104269	pCAS-PPO	FALSE
2c1_LB_104269_pCAS-PPO	wt	3	360	1	TRUE	4:731802	forward	4	731802	LB	2C1	0		3	AAG	-31	Col-0	104269	pCAS-PPO	FALSE
2c1_LB_104269_pCAS-PPO	wt	3	183	1	TRUE	4:808855	reverse	4	808855	LB	2C1	0		4	TAAG	-40	Col-0	104269	pCAS-PPO	FALSE
2c1_LB_104269_pCAS-PPO	wt	15	358	1	TRUE	4:816661	reverse	4	816661	LB	2C1	39	AGAATTGATACGTAGATCCATATGATAGTTTAGACAACT	0		-49	Col-0	104269	pCAS-PPO	FALSE
2c1_LB_104269_pCAS-PPO	wt	3	228	1	TRUE	4:886822	forward	4	886822	LB	2C1	6	GTTGTC	0		-25	Col-0	104269	pCAS-PPO	FALSE
2c1_LB_104269_pCAS-PPO	wt	4	196	1	TRUE	4:963848	reverse	4	963848	LB	2C1	0		2	CC	-13	Col-0	104269	pCAS-PPO	FALSE
2c1_LB_104269_pCAS-PPO	wt	9	293	0.888889	TRUE	4:988983	forward	4	988983	LB	2C1	5	TGTTT	0		-32	Col-0	104269	pCAS-PPO	FALSE
2c1_LB_104269_pCAS-PPO	wt	3	101	1	TRUE	4:1123568	reverse	4	1123568	LB	2C1	0		1	G	-55	Col-0	104269	pCAS-PPO	FALSE
2c1_LB_104269_pCAS-PPO	wt	4	104	1	TRUE	4:2075998	reverse	4	2075998	LB	2C1	0		0		-11	Col-0	104269	pCAS-PPO	FALSE
2c1_LB_104269_pCAS-PPO	wt	5	260	0.8	TRUE	4:4618423	forward	4	4618423	LB	2C1	0		4	TGTT	-19	Col-0	104269	pCAS-PPO	FALSE
2c1_LB_104269_pCAS-PPO	wt	4	70	1	TRUE	4:5315088	reverse	4	5315088	LB	2C1	0		2	AT	-24	Col-0	104269	pCAS-PPO	FALSE
2c1_LB_104269_pCAS-PPO	wt	15	363	1	TRUE	4:5757727	forward	4	5757727	LB	2C1	4	AAAT	0		-31	Col-0	104269	pCAS-PPO	FALSE
2c1_LB_104269_pCAS-PPO	wt	7	423	0.857143	TRUE	4:6090500	reverse	4	6090500	LB	2C1	0		3	AGC	-30	Col-0	104269	pCAS-PPO	FALSE
2c1_LB_104269_pCAS-PPO	wt	7	247	0.857143	TRUE	4:7263206	forward	4	7263206	LB	2C1	7	GTTATTA	0		-20	Col-0	104269	pCAS-PPO	FALSE
2c1_LB_104269_pCAS-PPO	wt	3	143	1	TRUE	4:8553613	reverse	4	8553613	LB	2C1	0		4	TTTA	-17	Col-0	104269	pCAS-PPO	FALSE
2c1_LB_104269_pCAS-PPO	wt	4	478	1	TRUE	4:9577834	reverse	4	9577834	LB	2C1	0		1	A	-32	Col-0	104269	pCAS-PPO	FALSE
2c1_LB_104269_pCAS-PPO	wt	4	399	1	TRUE	4:9920154	forward	4	9920154	LB	2C1	0		4	GTCA	-26	Col-0	104269	pCAS-PPO	FALSE
2c1_LB_104269_pCAS-PPO	wt	6	206	1	TRUE	4:10114879	forward	4	10114879	LB	2C1	0		1	A	-41	Col-0	104269	pCAS-PPO	FALSE
2c1_LB_104269_pCAS-PPO	wt	4	281	0.75	TRUE	4:10250642	reverse	4	10250642	LB	2C1	0		3	TTT	-18	Col-0	104269	pCAS-PPO	FALSE
2c1_LB_104269_pCAS-PPO	wt	3	418	1	TRUE	4:10617617	reverse	4	10617617	LB	2C1	0		4	AGTT	-38	Col-0	104269	pCAS-PPO	FALSE
2c1_LB_104269_pCAS-PPO	wt	12	261	1	TRUE	4:12565104	forward	4	12565104	LB	2C1	0		4	GTCA	-26	Col-0	104269	pCAS-PPO	FALSE
2c1_LB_104269_pCAS-PPO	wt	28	407	1	TRUE	4:12565118	reverse	4	12565118	LB	2C1	0		3	CAA	-25	Col-0	104269	pCAS-PPO	FALSE
2c1_LB_104269_pCAS-PPO	wt	11	466	1	TRUE	4:12969739	reverse	4	12969739	LB	2C1	0		3	TCA	-26	Col-0	104269	pCAS-PPO	FALSE
2c1_LB_104269_pCAS-PPO	wt	30	486	0.9	TRUE	4:13022760	forward	4	13022760	LB	2C1	0		2	CA	-15	Col-0	104269	pCAS-PPO	FALSE
2c1_LB_104269_pCAS-PPO	wt	3	149	1	TRUE	4:13770417	reverse	4	13770417	LB	2C1	6	ATTCTC	0		-23	Col-0	104269	pCAS-PPO	FALSE
2c1_LB_104269_pCAS-PPO	wt	9	396	1	TRUE	4:14003219	forward	4	14003219	LB	2C1	0		10	TTAACACCAC	-11	Col-0	104269	pCAS-PPO	FALSE
2c1_LB_104269_pCAS-PPO	wt	3	164	1	TRUE	4:14027117	forward	4	14027117	LB	2C1	0		4	CGTC	-27	Col-0	104269	pCAS-PPO	FALSE
2c1_LB_104269_pCAS-PPO	wt	4	246	1	TRUE	4:14077825	reverse	4	14077825	LB	2C1	0		3	CCA	-12	Col-0	104269	pCAS-PPO	FALSE
2c1_LB_104269_pCAS-PPO	wt	4	437	1	TRUE	4:14160995	forward	4	14160995	LB	2C1	0		2	GT	-20	Col-0	104269	pCAS-PPO	FALSE
2c1_LB_104269_pCAS-PPO	wt	5	308	1	TRUE	4:14313758	reverse	4	14313758	LB	2C1	0		3	CAC	-11	Col-0	104269	pCAS-PPO	FALSE
2c1_LB_104269_pCAS-PPO	wt	4	256	1	TRUE	4:14938411	reverse	4	14938411	LB	2C1	0		0		-19	Col-0	104269	pCAS-PPO	FALSE
2c1_LB_104269_pCAS-PPO	wt	60	429	0.918033	TRUE	4:14955926	forward	4	14955926	LB	2C1	0		5	GCGTC	-27	Col-0	104269	pCAS-PPO	FALSE
2c1_LB_104269_pCAS-PPO	wt	7	401	1	TRUE	4:15113409	reverse	4	15113409	LB	2C1	0		4	TCAA	-25	Col-0	104269	pCAS-PPO	FALSE
2c1_LB_104269_pCAS-PPO	wt	4	256	1	TRUE	4:15640654	forward	4	15640654	LB	2C1	21	AAACGACCAATTTGCGTATTG	0		-30	Col-0	104269	pCAS-PPO	FALSE
2c1_LB_104269_pCAS-PPO	wt	3	232	1	TRUE	4:15827423	forward	4	15827423	LB	2C1	0		6	CTAAGC	-30	Col-0	104269	pCAS-PPO	FALSE
2c1_LB_104269_pCAS-PPO	wt	4	481	1	TRUE	4:15827445	reverse	4	15827445	LB	2C1	0		1	T	-28	Col-0	104269	pCAS-PPO	FALSE
2c1_LB_104269_pCAS-PPO	wt	4	309	1	TRUE	4:16084447	forward	4	16084447	LB	2C1	0		5	GTCTA	-33	Col-0	104269	pCAS-PPO	FALSE
2c1_LB_104269_pCAS-PPO	wt	3	188	1	TRUE	4:16249594	forward	4	16249594	LB	2C1	0		4	ACAA	-9	Col-0	104269	pCAS-PPO	FALSE
2c1_LB_104269_pCAS-PPO	wt	7	323	1	TRUE	4:16249625	reverse	4	16249625	LB	2C1	0		4	GTTT	-18	Col-0	104269	pCAS-PPO	FALSE
2c1_LB_104269_pCAS-PPO	wt	4	252	0.75	TRUE	4:17148132	reverse	4	17148132	LB	2C1	0		5	TCTAA	-32	Col-0	104269	pCAS-PPO	FALSE
2c1_LB_104269_pCAS-PPO	wt	5	198	1	TRUE	4:17416558	reverse	4	17416558	LB	2C1	0		5	CAATT	-23	Col-0	104269	pCAS-PPO	FALSE
2c1_LB_104269_pCAS-PPO	wt	4	638	1	TRUE	4:2582046	forward	4	2582046	LB	2C1	0		12	ATCCTGACACCA	6	Col-0	104269	pCAS-PPO	FALSE
2c1_LB_104269_pCAS-PPO	wt	6	435	1	TRUE	4:14326271	forward	4	14326271	LB	2C1	8	TCAAAATA	0		1	Col-0	104269	pCAS-PPO	FALSE
2c1_LB_104269_pCAS-PPO	wt	7	341	0.916667	TRUE	4:874895	reverse	4	874895	LB	2C1	6	TGTTAT	0		0	Col-0	104269	pCAS-PPO	FALSE
2c1_LB_104269_pCAS-PPO	wt	21	367	0.857143	TRUE	4:18255232	forward	4	18255232	LB	2C1	0		2	TG	0	Col-0	104269	pCAS-PPO	FALSE
2c1_LB_104269_pCAS-PPO	wt	13	451	0.846154	TRUE	4:12334778	forward	4	12334778	LB	2C1	0		6	ATCCTG	0	Col-0	104269	pCAS-PPO	FALSE
2c1_LB_104269_pCAS-PPO	wt	4	377	1	TRUE	4:753995	reverse	4	753995	LB	2C1	0		0		0	Col-0	104269	pCAS-PPO	FALSE
2c1_LB_104269_pCAS-PPO	wt	8	538	0.875	TRUE	4:16643792	forward	4	16643792	LB	2C1	0		0		0	Col-0	104269	pCAS-PPO	FALSE
2c1_LB_104269_pCAS-PPO	wt	11	224	0.909091	TRUE	4:7524720	forward	4	7524720	LB	2C1	13	AGTTATAGTTTTC	0		0	Col-0	104269	pCAS-PPO	FALSE
2c1_LB_104269_pCAS-PPO	wt	3	217	0.75	TRUE	4:12975296	reverse	4	12975296	LB	2C1	25	ACGTGTGGTTATATTATAGAGATAA	0		0	Col-0	104269	pCAS-PPO	FALSE
2c1_LB_104269_pCAS-PPO	wt	5	365	0.8	TRUE	4:731714	forward	4	731714	LB	2C1	17	AAATTAACGCCGAATTG	0		0	Col-0	104269	pCAS-PPO	FALSE
2c1_LB_104269_pCAS-PPO	wt	9	313	1	TRUE	4:10292248	reverse	4	10292248	LB	2C1	5	TAGAT	0		0	Col-0	104269	pCAS-PPO	FALSE
2c1_LB_104269_pCAS-PPO	wt	4	371	0.9	TRUE	4:1460461	forward	4	1460461	LB	2C1	0		0		0	Col-0	104269	pCAS-PPO	FALSE
2c1_LB_104269_pCAS-PPO	wt	9	408	0.777778	TRUE	4:746538	reverse	4	746538	LB	2C1	0		0		0	Col-0	104269	pCAS-PPO	FALSE
2c1_LB_104269_pCAS-PPO	wt	3	443	1	TRUE	4:14689684	forward	4	14689684	LB	2C1	0		3	CTG	0	Col-0	104269	pCAS-PPO	FALSE
2c1_LB_104269_pCAS-PPO	wt	3	358	1	TRUE	4:10003509	reverse	4	10003509	LB	2C1	12	TTGCCTCTTGTG	0		0	Col-0	104269	pCAS-PPO	FALSE
2c1_LB_104269_pCAS-PPO	wt	8	456	0.75	TRUE	4:10114918	reverse	4	10114918	LB	2C1	0		6	ATATCC	-2	Col-0	104269	pCAS-PPO	FALSE
2c1_LB_104269_pCAS-PPO	wt	20	532	0.95	TRUE	4:10436181	reverse	4	10436181	LB	2C1	1	A	0		-3	Col-0	104269	pCAS-PPO	FALSE
2c1_LB_104269_pCAS-PPO	wt	4	437	1	TRUE	4:15062460	forward	4	15062460	LB	2C1	0		5	ATATC	-3	Col-0	104269	pCAS-PPO	FALSE
2c1_LB_104269_pCAS-PPO	wt	3	152	1	TRUE	4:6622663	forward	4	6622663	LB	2C1	0		1	C	-3	Col-0	104269	pCAS-PPO	FALSE
2c1_LB_104269_pCAS-PPO	wt	14	296	1	TRUE	4:724985	forward	4	724985	LB	2C1	2	TG	0		-4	Col-0	104269	pCAS-PPO	FALSE
2c1_LB_104269_pCAS-PPO	wt	3	338	1	TRUE	4:15613705	forward	4	15613705	LB	2C1	0		1	T	-4	Col-0	104269	pCAS-PPO	FALSE
2c1_LB_104269_pCAS-PPO	wt	3	183	1	TRUE	4:432203	reverse	4	432203	LB	2C1	0		2	AT	-4	Col-0	104269	pCAS-PPO	FALSE
2c1_LB_104269_pCAS-PPO	wt	3	298	1	TRUE	4:13804146	forward	4	13804146	LB	2C1	0		1	T	-4	Col-0	104269	pCAS-PPO	FALSE
2c1_LB_104269_pCAS-PPO	wt	4	347	1	TRUE	4:1121285	forward	4	1121285	LB	2C1	0		6	ATATAT	-4	Col-0	104269	pCAS-PPO	FALSE
2c1_LB_104269_pCAS-PPO	wt	3	392	1	TRUE	4:14984174	forward	4	14984174	LB	2C1	5	ACGCC	0		-5	Col-0	104269	pCAS-PPO	FALSE
2c1_LB_104269_pCAS-PPO	wt	4	468	1	TRUE	4:11122520	reverse	4	11122520	LB	2C1	0		5	ATATA	-5	Col-0	104269	pCAS-PPO	FALSE
2c1_LB_104269_pCAS-PPO	wt	5	294	1	TRUE	4:14009776	reverse	4	14009776	LB	2C1	25	GAAGACTTGAAATTCAGTATATGTA	0		-6	Col-0	104269	pCAS-PPO	FALSE
2c1_LB_104269_pCAS-PPO	wt	4	244	0.75	TRUE	4:12107692	forward	4	12107692	LB	2C1	12	TGATGTGATATC	0		-6	Col-0	104269	pCAS-PPO	FALSE
2c1_LB_104269_pCAS-PPO	wt	3	337	1	TRUE	4:14006030	reverse	4	14006030	LB	2C1	20	TGTGGACAAATTGTGGTGTA	0		-6	Col-0	104269	pCAS-PPO	FALSE
2c1_LB_104269_pCAS-PPO	wt	4	129	0.75	TRUE	4:6763464	reverse	4	6763464	LB	2C1	0		1	T	-6	Col-0	104269	pCAS-PPO	FALSE
2c1_LB_104269_pCAS-PPO	wt	4	198	0.75	TRUE	4:11628402	reverse	4	11628402	LB	2C1	0		1	A	-7	Col-0	104269	pCAS-PPO	FALSE
2c1_LB_104269_pCAS-PPO	wt	5	276	1	TRUE	4:9815355	forward	4	9815355	LB	2C1	5	CGGCC	0		-7	Col-0	104269	pCAS-PPO	FALSE
2c1_LB_104269_pCAS-PPO	wt	3	249	1	TRUE	4:15640691	reverse	4	15640691	LB	2C1	0		4	CAAT	-8	Col-0	104269	pCAS-PPO	FALSE
2c1_LB_104269_pCAS-PPO	wt	6	267	0.833333	TRUE	4:15113265	forward	4	15113265	LB	2C1	22	ATCTACATATGAGTTGTAAACA	0		-12	Col-0	104269	pCAS-PPO	FALSE
2c1_LB_104269_pCAS-PPO	wt	5	194	1	TRUE	4:729808	reverse	4	729808	LB	2C1	22	GGGATGTGATATGTCTTATCTT	0		-19	Col-0	104269	pCAS-PPO	FALSE
2c1_LB_104269_pCAS-PPO	wt	4	160	0.75	TRUE	4:886821	reverse	4	886821	LB	2C1	54	ATTGTGGTGAAATCAAAAAATACCTTTTCTAGTTCTCATTTTTGCGTTGGTCCA	0		-20	Col-0	104269	pCAS-PPO	FALSE
2c1_LB_104269_pCAS-PPO	wt	3	225	1	TRUE	0.252778	reverse	5	64	LB	2C1	0		5	TCTAA	-32	Col-0	104269	pCAS-PPO	FALSE
2c1_LB_104269_pCAS-PPO	wt	8	170	0.8	TRUE	5:142710	forward	5	142710	LB	2C1	0		2	GT	-39	Col-0	104269	pCAS-PPO	FALSE
2c1_LB_104269_pCAS-PPO	wt	5	289	1	TRUE	5:162327	forward	5	162327	LB	2C1	0		4	TAAG	-31	Col-0	104269	pCAS-PPO	FALSE
2c1_LB_104269_pCAS-PPO	wt	3	249	1	TRUE	5:230203	forward	5	230203	LB	2C1	0		5	CCACA	-10	Col-0	104269	pCAS-PPO	FALSE
2c1_LB_104269_pCAS-PPO	wt	16	409	1	TRUE	5:244401	reverse	5	244401	LB	2C1	0		3	TCA	-26	Col-0	104269	pCAS-PPO	FALSE
2c1_LB_104269_pCAS-PPO	wt	5	257	1	TRUE	5:272894	reverse	5	272894	LB	2C1	16	CTCTGCCTGTTCCCTG	0		-20	Col-0	104269	pCAS-PPO	FALSE
2c1_LB_104269_pCAS-PPO	wt	3	174	1	TRUE	5:469462	forward	5	469462	LB	2C1	0		4	ACAA	-9	Col-0	104269	pCAS-PPO	FALSE
2c1_LB_104269_pCAS-PPO	wt	26	348	0.944444	TRUE	5:487606	forward	5	487606	LB	2C1	0		4	ATTT	-22	Col-0	104269	pCAS-PPO	FALSE
2c1_LB_104269_pCAS-PPO	wt	5	279	1	TRUE	5:556603	forward	5	556603	LB	2C1	0		4	ACAA	-9	Col-0	104269	pCAS-PPO	FALSE
2c1_LB_104269_pCAS-PPO	wt	5	463	1	TRUE	5:737618	forward	5	737618	LB	2C1	0		2	TT	-23	Col-0	104269	pCAS-PPO	FALSE
2c1_LB_104269_pCAS-PPO	wt	3	402	1	TRUE	5:737678	reverse	5	737678	LB	2C1	0		8	TTTGTTTA	-17	Col-0	104269	pCAS-PPO	FALSE
2c1_LB_104269_pCAS-PPO	wt	4	388	1	TRUE	5:793934	forward	5	793934	LB	2C1	0		4	ATTT	-22	Col-0	104269	pCAS-PPO	FALSE
2c1_LB_104269_pCAS-PPO	wt	3	156	1	TRUE	5:998471	reverse	5	998471	LB	2C1	0		11	AATGTGTTTAC	-16	Col-0	104269	pCAS-PPO	FALSE
2c1_LB_104269_pCAS-PPO	wt	7	342	1	TRUE	5:1033600	reverse	5	1033600	LB	2C1	40	ATTAAGTTTAAACTATCAGTTTAAACTATAAGTTGTATTC	0		-38	Col-0	104269	pCAS-PPO	FALSE
2c1_LB_104269_pCAS-PPO	wt	3	185	1	TRUE	5:1469763	reverse	5	1469763	LB	2C1	0		2	CA	-10	Col-0	104269	pCAS-PPO	FALSE
2c1_LB_104269_pCAS-PPO	wt	6	270	1	TRUE	5:1705586	reverse	5	1705586	LB	2C1	0		2	TC	-35	Col-0	104269	pCAS-PPO	FALSE
2c1_LB_104269_pCAS-PPO	wt	3	330	1	TRUE	5:1742975	forward	5	1742975	LB	2C1	0		2	TT	-23	Col-0	104269	pCAS-PPO	FALSE
2c1_LB_104269_pCAS-PPO	wt	7	514	1	TRUE	5:1841290	forward	5	1841290	LB	2C1	3	CTA	0		-20	Col-0	104269	pCAS-PPO	FALSE
2c1_LB_104269_pCAS-PPO	wt	21	353	1	TRUE	5:1977422	forward	5	1977422	LB	2C1	18	AACACTGAACAGTGATGA	0		-21	Col-0	104269	pCAS-PPO	FALSE
2c1_LB_104269_pCAS-PPO	wt	128	453	0.784615	TRUE	5:1977479	reverse	5	1977479	LB	2C1	13	CTAAACGTCCGCA	0		-20	Col-0	104269	pCAS-PPO	FALSE
2c1_LB_104269_pCAS-PPO	wt	3	291	1	TRUE	5:2127784	reverse	5	2127784	LB	2C1	3	CAG	0		-41	Col-0	104269	pCAS-PPO	FALSE
2c1_LB_104269_pCAS-PPO	wt	4	280	1	TRUE	5:2727180	forward	5	2727180	LB	2C1	0		4	TCAA	-25	Col-0	104269	pCAS-PPO	FALSE
2c1_LB_104269_pCAS-PPO	wt	16	448	0.9375	TRUE	5:2785334	reverse	5	2785334	LB	2C1	0		6	CACAAT	-8	Col-0	104269	pCAS-PPO	FALSE
2c1_LB_104269_pCAS-PPO	wt	3	349	1	TRUE	5:2937939	reverse	5	2937939	LB	2C1	0		3	AGC	-30	Col-0	104269	pCAS-PPO	FALSE
2c1_LB_104269_pCAS-PPO	wt	10	284	1	TRUE	5:3133004	forward	5	3133004	LB	2C1	0		6	TTTACA	-15	Col-0	104269	pCAS-PPO	FALSE
2c1_LB_104269_pCAS-PPO	wt	3	132	1	TRUE	5:3526782	reverse	5	3526782	LB	2C1	0		5	AATTT	-22	Col-0	104269	pCAS-PPO	FALSE
2c1_LB_104269_pCAS-PPO	wt	9	248	1	TRUE	5:4591621	reverse	5	4591621	LB	2C1	13	ACAATATATCCGC	0		-56	Col-0	104269	pCAS-PPO	FALSE
2c1_LB_104269_pCAS-PPO	wt	14	370	0.928571	TRUE	5:4646927	forward	5	4646927	LB	2C1	11	GTTGTCGTAAT	0		-25	Col-0	104269	pCAS-PPO	FALSE
2c1_LB_104269_pCAS-PPO	wt	3	309	1	TRUE	5:4785513	reverse	5	4785513	LB	2C1	0		3	TTT	-22	Col-0	104269	pCAS-PPO	FALSE
2c1_LB_104269_pCAS-PPO	wt	3	161	1	TRUE	5:5018309	reverse	5	5018309	LB	2C1	0		0		-11	Col-0	104269	pCAS-PPO	FALSE
2c1_LB_104269_pCAS-PPO	wt	8	357	1	TRUE	5:6270014	reverse	5	6270014	LB	2C1	0		3	CAA	-25	Col-0	104269	pCAS-PPO	FALSE
2c1_LB_104269_pCAS-PPO	wt	12	474	0.916667	TRUE	5:7441189	reverse	5	7441189	LB	2C1	0		2	AA	-32	Col-0	104269	pCAS-PPO	FALSE
2c1_LB_104269_pCAS-PPO	wt	4	171	0.75	TRUE	5:7541288	reverse	5	7541288	LB	2C1	49	ATTTGGTGTTATTAAGTTATTGTCTAAACGTCCGCAATGTGTTATTAAG	0		-15	Col-0	104269	pCAS-PPO	FALSE
2c1_LB_104269_pCAS-PPO	wt	20	407	0.95	TRUE	5:8906604	forward	5	8906604	LB	2C1	7	TAACCTA	0		-43	Col-0	104269	pCAS-PPO	FALSE
2c1_LB_104269_pCAS-PPO	wt	36	539	1	TRUE	5:8925133	reverse	5	8925133	LB	2C1	6	CACGCC	0		-19	Col-0	104269	pCAS-PPO	FALSE
2c1_LB_104269_pCAS-PPO	wt	5	287	1	TRUE	5:9023763	reverse	5	9023763	LB	2C1	0		2	GC	-54	Col-0	104269	pCAS-PPO	FALSE
2c1_LB_104269_pCAS-PPO	wt	8	335	1	TRUE	5:9337526	reverse	5	9337526	LB	2C1	0		1	A	-12	Col-0	104269	pCAS-PPO	FALSE
2c1_LB_104269_pCAS-PPO	wt	14	290	1	TRUE	5:14893687	reverse	5	14893687	LB	2C1	0		4	CGCA	-53	Col-0	104269	pCAS-PPO	FALSE
2c1_LB_104269_pCAS-PPO	wt	6	341	1	TRUE	5:15254293	reverse	5	15254293	LB	2C1	14	CGAAGAGGCCCGTC	0		-21	Col-0	104269	pCAS-PPO	FALSE
2c1_LB_104269_pCAS-PPO	wt	15	251	0.866667	TRUE	5:15915185	forward	5	15915185	LB	2C1	0		8	ACTATATA	-5	Col-0	104269	pCAS-PPO	FALSE
2c1_LB_104269_pCAS-PPO	wt	11	340	1	TRUE	5:16206754	reverse	5	16206754	LB	2C1	0		5	TGTCT	-34	Col-0	104269	pCAS-PPO	FALSE
2c1_LB_104269_pCAS-PPO	wt	4	277	0.75	TRUE	5:16662127	forward	5	16662127	LB	2C1	0		3	TTT	-22	Col-0	104269	pCAS-PPO	FALSE
2c1_LB_104269_pCAS-PPO	wt	3	381	1	TRUE	5:17321205	forward	5	17321205	LB	2C1	3	TCA	0		-13	Col-0	104269	pCAS-PPO	FALSE
2c1_LB_104269_pCAS-PPO	wt	3	327	1	TRUE	5:17828250	forward	5	17828250	LB	2C1	0		4	TTTG	-21	Col-0	104269	pCAS-PPO	FALSE
2c1_LB_104269_pCAS-PPO	wt	14	431	1	TRUE	5:18367700	forward	5	18367700	LB	2C1	0		4	ATTT	-22	Col-0	104269	pCAS-PPO	FALSE
2c1_LB_104269_pCAS-PPO	wt	4	203	1	TRUE	5:18740825	reverse	5	18740825	LB	2C1	48	TTAGACAACTTAATAACACATTGCGGACATTTTTAATGTACTGAATCC	0		-54	Col-0	104269	pCAS-PPO	FALSE
2c1_LB_104269_pCAS-PPO	wt	3	531	1	TRUE	5:19574670	reverse	5	19574670	LB	2C1	3	CGC	0		-35	Col-0	104269	pCAS-PPO	FALSE
2c1_LB_104269_pCAS-PPO	wt	49	500	0.980392	TRUE	5:20205178	reverse	5	20205178	LB	2C1	0		5	GTCAA	-25	Col-0	104269	pCAS-PPO	FALSE
2c1_LB_104269_pCAS-PPO	wt	5	620	0.8	TRUE	5:20524755	reverse	5	20524755	LB	2C1	0		3	AAG	-31	Col-0	104269	pCAS-PPO	FALSE
2c1_LB_104269_pCAS-PPO	wt	11	445	0.909091	TRUE	5:21496020	forward	5	21496020	LB	2C1	0		3	TTT	-18	Col-0	104269	pCAS-PPO	FALSE
2c1_LB_104269_pCAS-PPO	wt	3	213	1	TRUE	5:21598359	forward	5	21598359	LB	2C1	0		4	ACAC	-14	Col-0	104269	pCAS-PPO	FALSE
2c1_LB_104269_pCAS-PPO	wt	4	385	1	TRUE	5:22309544	reverse	5	22309544	LB	2C1	0		4	ACCA	-12	Col-0	104269	pCAS-PPO	FALSE
2c1_LB_104269_pCAS-PPO	wt	7	477	0.857143	TRUE	5:23077836	forward	5	23077836	LB	2C1	0		7	ACCACAA	-9	Col-0	104269	pCAS-PPO	FALSE
2c1_LB_104269_pCAS-PPO	wt	5	261	1	TRUE	5:23077892	reverse	5	23077892	LB	2C1	0		1	T	-23	Col-0	104269	pCAS-PPO	FALSE
2c1_LB_104269_pCAS-PPO	wt	4	519	0.75	TRUE	5:23157353	reverse	5	23157353	LB	2C1	7	CTAAGCG	0		-20	Col-0	104269	pCAS-PPO	FALSE
2c1_LB_104269_pCAS-PPO	wt	4	205	1	TRUE	5:23206969	reverse	5	23206969	LB	2C1	0		1	T	-23	Col-0	104269	pCAS-PPO	FALSE
2c1_LB_104269_pCAS-PPO	wt	3	94	1	TRUE	5:23294918	reverse	5	23294918	LB	2C1	0		2	TT	-43	Col-0	104269	pCAS-PPO	FALSE
2c1_LB_104269_pCAS-PPO	wt	37	354	0.756757	TRUE	5:23409441	reverse	5	23409441	LB	2C1	12	AAAACGTCCGCA	0		-17	Col-0	104269	pCAS-PPO	FALSE
2c1_LB_104269_pCAS-PPO	wt	32	423	0.909091	TRUE	5:23507950	reverse	5	23507950	LB	2C1	0		3	TTT	-18	Col-0	104269	pCAS-PPO	FALSE
2c1_LB_104269_pCAS-PPO	wt	10	400	1	TRUE	5:23507955	reverse	5	23507955	LB	2C1	10	ATTGTGGTGT	0		-24	Col-0	104269	pCAS-PPO	FALSE
2c1_LB_104269_pCAS-PPO	wt	12	372	0.833333	TRUE	5:23762447	reverse	5	23762447	LB	2C1	13	ACTTAATAACACA	0		-15	Col-0	104269	pCAS-PPO	FALSE
2c1_LB_104269_pCAS-PPO	wt	30	428	0.870968	TRUE	5:24046147	forward	5	24046147	LB	2C1	0		2	CA	-15	Col-0	104269	pCAS-PPO	FALSE
2c1_LB_104269_pCAS-PPO	wt	9	372	0.888889	TRUE	5:25026633	reverse	5	25026633	LB	2C1	14	CGGATGGTTTGCGA	0		-35	Col-0	104269	pCAS-PPO	FALSE
2c1_LB_104269_pCAS-PPO	wt	29	412	0.965517	TRUE	5:25146970	forward	5	25146970	LB	2C1	21	ATCCGTTCTTTTCTCTTAGAA	0		-22	Col-0	104269	pCAS-PPO	FALSE
2c1_LB_104269_pCAS-PPO	wt	7	223	0.857143	TRUE	5:25146982	reverse	5	25146982	LB	2C1	0		2	TT	-23	Col-0	104269	pCAS-PPO	FALSE
2c1_LB_104269_pCAS-PPO	wt	4	240	1	TRUE	5:25168007	forward	5	25168007	LB	2C1	0		7	TCCACCA	-12	Col-0	104269	pCAS-PPO	FALSE
2c1_LB_104269_pCAS-PPO	wt	3	289	1	TRUE	5:25268337	forward	5	25268337	LB	2C1	0		0		-13	Col-0	104269	pCAS-PPO	FALSE
2c1_LB_104269_pCAS-PPO	wt	7	477	1	TRUE	5:25586433	forward	5	25586433	LB	2C1	0		2	GT	-39	Col-0	104269	pCAS-PPO	FALSE
2c1_LB_104269_pCAS-PPO	wt	4	405	1	TRUE	5:26040097	forward	5	26040097	LB	2C1	0		6	GTTTAC	-16	Col-0	104269	pCAS-PPO	FALSE
2c1_LB_104269_pCAS-PPO	wt	5	403	1	TRUE	5:26145770	reverse	5	26145770	LB	2C1	0		4	TTGT	-36	Col-0	104269	pCAS-PPO	FALSE
2c1_LB_104269_pCAS-PPO	wt	9	522	1	TRUE	5:26221573	forward	5	26221573	LB	2C1	7	CGTGCGT	0		-52	Col-0	104269	pCAS-PPO	FALSE
2c1_LB_104269_pCAS-PPO	wt	3	295	1	TRUE	5:26460874	forward	5	26460874	LB	2C1	0		2	TA	-33	Col-0	104269	pCAS-PPO	FALSE
2c1_LB_104269_pCAS-PPO	wt	12	380	1	TRUE	5:26627140	forward	5	26627140	LB	2C1	3	GTT	0		-26	Col-0	104269	pCAS-PPO	FALSE
2c1_LB_104269_pCAS-PPO	wt	4	552	1	TRUE	5:26769384	forward	5	26769384	LB	2C1	0		4	TTAA	-41	Col-0	104269	pCAS-PPO	FALSE
2c1_LB_104269_pCAS-PPO	wt	8	394	0.875	TRUE	5:26807251	forward	5	26807251	LB	2C1	0		0		-32	Col-0	104269	pCAS-PPO	FALSE
2c1_LB_104269_pCAS-PPO	wt	3	444	1	TRUE	5:26817980	forward	5	26817980	LB	2C1	0		2	CC	-13	Col-0	104269	pCAS-PPO	FALSE
2c1_LB_104269_pCAS-PPO	wt	16	416	0.875	TRUE	5:6459300	reverse	5	6459300	LB	2C1	15	CAATATATCCGATTA	0		6	Col-0	104269	pCAS-PPO	FALSE
2c1_LB_104269_pCAS-PPO	wt	3	307	1	TRUE	5:7441180	forward	5	7441180	LB	2C1	17	TTACACCACAATATATC	0		6	Col-0	104269	pCAS-PPO	FALSE
2c1_LB_104269_pCAS-PPO	wt	9	407	0.888889	TRUE	5:627284	reverse	5	627284	LB	2C1	0		6	CTGCCA	3	Col-0	104269	pCAS-PPO	FALSE
2c1_LB_104269_pCAS-PPO	wt	9	323	0.888889	TRUE	5:7720051	forward	5	7720051	LB	2C1	0		6	CCTGCC	2	Col-0	104269	pCAS-PPO	FALSE
2c1_LB_104269_pCAS-PPO	wt	12	407	0.916667	TRUE	5:6599434	reverse	5	6599434	LB	2C1	0		7	ATCCTGC	1	Col-0	104269	pCAS-PPO	FALSE
2c1_LB_104269_pCAS-PPO	wt	5	122	0.8	TRUE	5:22099833	forward	5	22099833	LB	2C1	0		2	TG	0	Col-0	104269	pCAS-PPO	FALSE
2c1_LB_104269_pCAS-PPO	wt	40	368	0.925	TRUE	5:940120	reverse	5	940120	LB	2C1	18	GAAAGCGGGCAGTGAGCG	0		0	Col-0	104269	pCAS-PPO	FALSE
2c1_LB_104269_pCAS-PPO	wt	4	291	1	TRUE	5:26566916	forward	5	26566916	LB	2C1	0		3	CTG	0	Col-0	104269	pCAS-PPO	FALSE
2c1_LB_104269_pCAS-PPO	wt	4	590	0.75	TRUE	5:1366605	reverse	5	1366605	LB	2C1	0		3	CTG	0	Col-0	104269	pCAS-PPO	FALSE
2c1_LB_104269_pCAS-PPO	wt	11	395	0.909091	TRUE	5:3130681	reverse	5	3130681	LB	2C1	0		3	CTG	0	Col-0	104269	pCAS-PPO	FALSE
2c1_LB_104269_pCAS-PPO	wt	6	343	0.833333	TRUE	5:24103284	reverse	5	24103284	LB	2C1	0		3	CTG	0	Col-0	104269	pCAS-PPO	FALSE
2c1_LB_104269_pCAS-PPO	wt	6	397	1	TRUE	5:3759747	forward	5	3759747	LB	2C1	0		3	CTG	0	Col-0	104269	pCAS-PPO	FALSE
2c1_LB_104269_pCAS-PPO	wt	10	270	1	TRUE	5:21160556	forward	5	21160556	LB	2C1	0		3	CTG	0	Col-0	104269	pCAS-PPO	FALSE
2c1_LB_104269_pCAS-PPO	wt	15	361	0.8	TRUE	5:6413866	forward	5	6413866	LB	2C1	10	TGGTTTATAT	0		0	Col-0	104269	pCAS-PPO	FALSE
2c1_LB_104269_pCAS-PPO	wt	15	393	0.933333	TRUE	5:940082	reverse	5	940082	LB	2C1	4	AATT	0		0	Col-0	104269	pCAS-PPO	FALSE
2c1_LB_104269_pCAS-PPO	wt	8	302	0.875	TRUE	5:24137587	reverse	5	24137587	LB	2C1	0		3	CTG	0	Col-0	104269	pCAS-PPO	FALSE
2c1_LB_104269_pCAS-PPO	wt	8	304	1	TRUE	5:26563738	reverse	5	26563738	LB	2C1	12	TACACCACAATA	0		0	Col-0	104269	pCAS-PPO	FALSE
2c1_LB_104269_pCAS-PPO	wt	4	469	0.75	TRUE	5:13929538	forward	5	13929538	LB	2C1	1	T	0		0	Col-0	104269	pCAS-PPO	FALSE
2c1_LB_104269_pCAS-PPO	wt	8	296	1	TRUE	5:22834164	forward	5	22834164	LB	2C1	7	AAAACTG	0		0	Col-0	104269	pCAS-PPO	FALSE
2c1_LB_104269_pCAS-PPO	wt	4	292	1	TRUE	5:9230235	forward	5	9230235	LB	2C1	0		0		0	Col-0	104269	pCAS-PPO	FALSE
2c1_LB_104269_pCAS-PPO	wt	10	210	0.9	TRUE	5:20632321	reverse	5	20632321	LB	2C1	1	T	0		0	Col-0	104269	pCAS-PPO	FALSE
2c1_LB_104269_pCAS-PPO	wt	5	205	0.8	TRUE	5:23453394	forward	5	23453394	LB	2C1	0		3	CTG	0	Col-0	104269	pCAS-PPO	FALSE
2c1_LB_104269_pCAS-PPO	wt	27	284	0.962963	TRUE	5:1966797	reverse	5	1966797	LB	2C1	13	ACAAGTTCAGCTG	0		-1	Col-0	104269	pCAS-PPO	FALSE
2c1_LB_104269_pCAS-PPO	wt	12	283	0.833333	TRUE	5:2359886	reverse	5	2359886	LB	2C1	25	TACGTAATTCAGTACATTAAAAACG	0		-1	Col-0	104269	pCAS-PPO	FALSE
2c1_LB_104269_pCAS-PPO	wt	12	484	0.833333	TRUE	5:23069584	reverse	5	23069584	LB	2C1	2	AG	0		-1	Col-0	104269	pCAS-PPO	FALSE
2c1_LB_104269_pCAS-PPO	wt	25	386	0.96	TRUE	5:940076	reverse	5	940076	LB	2C1	0		0		-2	Col-0	104269	pCAS-PPO	FALSE
2c1_LB_104269_pCAS-PPO	wt	19	445	0.947368	TRUE	5:26502497	forward	5	26502497	LB	2C1	4	AGTG	0		-3	Col-0	104269	pCAS-PPO	FALSE
2c1_LB_104269_pCAS-PPO	wt	3	179	1	TRUE	5:26107399	reverse	5	26107399	LB	2C1	0		2	TC	-3	Col-0	104269	pCAS-PPO	FALSE
2c1_LB_104269_pCAS-PPO	wt	23	437	0.869565	TRUE	5:26042314	forward	5	26042314	LB	2C1	16	ACACAATTAATAAAGA	0		-4	Col-0	104269	pCAS-PPO	FALSE
2c1_LB_104269_pCAS-PPO	wt	6	300	1	TRUE	5:4430890	forward	5	4430890	LB	2C1	0		4	ATAT	-4	Col-0	104269	pCAS-PPO	FALSE
2c1_LB_104269_pCAS-PPO	wt	5	128	0.8	TRUE	5:9808506	reverse	5	9808506	LB	2C1	0		5	TATAT	-4	Col-0	104269	pCAS-PPO	FALSE
2c1_LB_104269_pCAS-PPO	wt	7	329	0.857143	TRUE	5:6988084	forward	5	6988084	LB	2C1	3	AGC	0		-4	Col-0	104269	pCAS-PPO	FALSE
2c1_LB_104269_pCAS-PPO	wt	12	229	0.923077	TRUE	5:8548730	forward	5	8548730	LB	2C1	0		3	TAT	-4	Col-0	104269	pCAS-PPO	FALSE
2c1_LB_104269_pCAS-PPO	wt	20	404	0.85	TRUE	5:4632682	reverse	5	4632682	LB	2C1	29	GCAAACCTAAGAGAAAAACAATATGTCAA	0		-6	Col-0	104269	pCAS-PPO	FALSE
2c1_LB_104269_pCAS-PPO	wt	28	555	0.928571	TRUE	5:20205144	forward	5	20205144	LB	2C1	0		3	TAT	-6	Col-0	104269	pCAS-PPO	FALSE
2c1_LB_104269_pCAS-PPO	wt	47	427	0.87234	TRUE	5:2441181	reverse	5	2441181	LB	2C1	2	GA	0		-9	Col-0	104269	pCAS-PPO	FALSE
2c1_LB_104269_pCAS-PPO	wt	8	312	1	TRUE	5:4632672	forward	5	4632672	LB	2C1	2	AG	0		-7	Col-0	104269	pCAS-PPO	FALSE
2c1_LB_104269_pCAS-PPO	wt	10	241	0.8	TRUE	5:6475477	forward	5	6475477	LB	2C1	6	ACCAAA	0		-7	Col-0	104269	pCAS-PPO	FALSE
2c1_LB_104269_pCAS-PPO	wt	7	244	1	TRUE	5:2977758	forward	5	2977758	LB	2C1	0		4	AATA	-7	Col-0	104269	pCAS-PPO	FALSE
2c1_LB_104269_pCAS-PPO	wt	6	375	0.833333	TRUE	5:24527993	forward	5	24527993	LB	2C1	15	TCGGCGTTAATTCAG	0		-8	Col-0	104269	pCAS-PPO	FALSE
2c1_LB_104269_pCAS-PPO	wt	4	202	1	TRUE	5:5973450	reverse	5	5973450	LB	2C1	0		2	AT	-8	Col-0	104269	pCAS-PPO	FALSE
2c1_LB_104269_pCAS-PPO	wt	9	277	1	TRUE	5:21502691	reverse	5	21502691	LB	2C1	0		4	CAAT	-8	Col-0	104269	pCAS-PPO	FALSE
2c1_LB_104269_pCAS-PPO	wt	10	532	0.8	TRUE	5:26682512	reverse	5	26682512	LB	2C1	0		0		-8	Col-0	104269	pCAS-PPO	FALSE
2c1_LB_104269_pCAS-PPO	wt	3	342	1	TRUE	5:19758489	reverse	5	19758489	LB	2C1	0		3	AAT	-8	Col-0	104269	pCAS-PPO	FALSE
2c1_LB_104269_pCAS-PPO	wt	15	338	1	TRUE	5:26627210	reverse	5	26627210	LB	2C1	0		2	AA	-9	Col-0	104269	pCAS-PPO	FALSE
2c1_LB_104269_pCAS-PPO	wt	17	337	1	TRUE	5:24921865	forward	5	24921865	LB	2C1	0		2	AA	-9	Col-0	104269	pCAS-PPO	FALSE
2c1_LB_104269_pCAS-PPO	wt	4	302	1	TRUE	5:25423849	forward	5	25423849	LB	2C1	6	AAAGTC	0		-9	Col-0	104269	pCAS-PPO	FALSE
2c1_LB_104269_pCAS-PPO	wt	6	286	1	TRUE	5:22336863	forward	5	22336863	LB	2C1	0		0		-9	Col-0	104269	pCAS-PPO	FALSE
2c1_LB_104269_pCAS-PPO	wt	7	342	1	TRUE	5:24137518	forward	5	24137518	LB	2C1	19	GGTGGAAAGAGTGGTTGTC	0		-9	Col-0	104269	pCAS-PPO	FALSE
2c1_LB_104269_pCAS-PPO	wt	4	213	1	TRUE	5:21502697	reverse	5	21502697	LB	2C1	4	CTTG	0		-9	Col-0	104269	pCAS-PPO	FALSE
2c1_LB_104269_pCAS-PPO	wt	9	438	1	TRUE	5:21155185	forward	5	21155185	LB	2C1	9	TATTAGTCT	0		-10	Col-0	104269	pCAS-PPO	FALSE
2c1_LB_104269_pCAS-PPO	wt	3	166	1	TRUE	5:26677625	reverse	5	26677625	LB	2C1	10	GGATATATTG	0		-10	Col-0	104269	pCAS-PPO	FALSE
2c1_LB_104269_pCAS-PPO	wt	3	321	1	TRUE	5:26074744	forward	5	26074744	LB	2C1	8	GATAAGCG	0		-11	Col-0	104269	pCAS-PPO	FALSE
2c1_LB_104269_pCAS-PPO	wt	6	322	1	TRUE	5:7387058	reverse	5	7387058	LB	2C1	9	CGCCCTTTT	0		-13	Col-0	104269	pCAS-PPO	FALSE
2c1_LB_104269_pCAS-PPO	wt	7	206	0.857143	TRUE	5:20730781	reverse	5	20730781	LB	2C1	26	GCAATTTGTTTACACCGTCAATTTGT	0		-13	Col-0	104269	pCAS-PPO	FALSE
2c1_LB_104269_pCAS-PPO	wt	4	274	1	TRUE	5:925879	forward	5	925879	LB	2C1	13	TAATCTGTGGGTT	0		-16	Col-0	104269	pCAS-PPO	FALSE
2c1_LB_104269_pCAS-PPO	wt	3	233	1	TRUE	5:26273176	forward	5	26273176	LB	2C1	17	GACGTCCGCAATTTGTT	0		-17	Col-0	104269	pCAS-PPO	FALSE
2c1_LB_104269_pCAS-PPO	wt	5	320	1	TRUE	5:4555658	reverse	5	4555658	LB	2C1	53	CTTCTAATGCGTGAAATAGTCTTATGATGACAAACACTCTGAAGACCAGATGC	0		-24	Col-0	104269	pCAS-PPO	FALSE
2c1_LB_104269_pCAS-PPO	wt	5	307	1	TRUE	Mt:43355	forward	Mt	43355	LB	2C1	0		2	AA	-25	Col-0	104269	pCAS-PPO	FALSE
2c1_LB_104269_pCAS-PPO	wt	6	580	0.833333	TRUE	Mt:61	reverse	Mt	61	LB	2C1	7	TAGATCC	0		-4	Col-0	104269	pCAS-PPO	FALSE
2c1_LB_104269_pCAS-PPO	wt	3	173	1	TRUE	Mt:16228	forward	Mt	16228	LB	2C1	25	TGATCCAAACTGAATAAACGACATT	0		-14	Col-0	104269	pCAS-PPO	FALSE
2c1_RB_104269_pCAS-PPO	wt	35	610	0.971429	TRUE	1:95788	reverse	1	95788	RB	2C1	11	CACGGTCATGT	0		-6	Col-0	104269	pCAS-PPO	FALSE
2c1_RB_104269_pCAS-PPO	wt	5	248	0.8	TRUE	1:225371	forward	1	225371	RB	2C1	0		5	TCAGT	-6	Col-0	104269	pCAS-PPO	FALSE
2c1_RB_104269_pCAS-PPO	wt	5	251	1	TRUE	1:342950	forward	1	342950	RB	2C1	3	CAA	0		-4	Col-0	104269	pCAS-PPO	FALSE
2c1_RB_104269_pCAS-PPO	wt	5	247	1	TRUE	1:1418868	forward	1	1418868	RB	2C1	0		4	CAGT	-6	Col-0	104269	pCAS-PPO	FALSE
2c1_RB_104269_pCAS-PPO	wt	20	435	1	TRUE	1:1741083	reverse	1	1741083	RB	2C1	3	ATT	0		-26	Col-0	104269	pCAS-PPO	FALSE
2c1_RB_104269_pCAS-PPO	wt	5	441	1	TRUE	1:3295727	forward	1	3295727	RB	2C1	0		0		0	Col-0	104269	pCAS-PPO	FALSE
2c1_RB_104269_pCAS-PPO	wt	4	291	0.75	TRUE	1:3777184	reverse	1	3777184	RB	2C1	0		0		0	Col-0	104269	pCAS-PPO	FALSE
2c1_RB_104269_pCAS-PPO	wt	20	397	0.9	TRUE	1:3956619	reverse	1	3956619	RB	2C1	0		1	T	-3	Col-0	104269	pCAS-PPO	FALSE
2c1_RB_104269_pCAS-PPO	wt	18	459	0.888889	TRUE	1:4017178	reverse	1	4017178	RB	2C1	0		0		0	Col-0	104269	pCAS-PPO	FALSE
2c1_RB_104269_pCAS-PPO	wt	5	606	1	TRUE	1:4417019	forward	1	4417019	RB	2C1	0		3	CGC	-26	Col-0	104269	pCAS-PPO	FALSE
2c1_RB_104269_pCAS-PPO	wt	6	305	1	TRUE	1:4666540	forward	1	4666540	RB	2C1	0		0		-1	Col-0	104269	pCAS-PPO	FALSE
2c1_RB_104269_pCAS-PPO	wt	10	323	0.923077	TRUE	1:4794166	reverse	1	4794166	RB	2C1	0		1	A	0	Col-0	104269	pCAS-PPO	FALSE
2c1_RB_104269_pCAS-PPO	wt	47	425	0.93617	TRUE	1:4997680	reverse	1	4997680	RB	2C1	0		1	A	2	Col-0	104269	pCAS-PPO	FALSE
2c1_RB_104269_pCAS-PPO	wt	5	303	1	TRUE	1:5018147	forward	1	5018147	RB	2C1	6	GGGTAA	0		-3	Col-0	104269	pCAS-PPO	FALSE
2c1_RB_104269_pCAS-PPO	wt	4	642	1	TRUE	1:5884653	forward	1	5884653	RB	2C1	0		2	AG	-7	Col-0	104269	pCAS-PPO	FALSE
2c1_RB_104269_pCAS-PPO	wt	27	362	0.928571	TRUE	1:6663406	forward	1	6663406	RB	2C1	0		5	TAAAC	-13	Col-0	104269	pCAS-PPO	FALSE
2c1_RB_104269_pCAS-PPO	wt	5	506	1	TRUE	1:6997806	forward	1	6997806	RB	2C1	0		3	TGA	0	Col-0	104269	pCAS-PPO	FALSE
2c1_RB_104269_pCAS-PPO	wt	57	468	0.948276	TRUE	1:7845836	forward	1	7845836	RB	2C1	0		3	TGT	-4	Col-0	104269	pCAS-PPO	FALSE
2c1_RB_104269_pCAS-PPO	wt	4	331	1	TRUE	1:8352603	reverse	1	8352603	RB	2C1	0		3	ACA	2	Col-0	104269	pCAS-PPO	FALSE
2c1_RB_104269_pCAS-PPO	wt	6	131	0.857143	TRUE	1:8960998	reverse	1	8960998	RB	2C1	2	TC	0		0	Col-0	104269	pCAS-PPO	FALSE
2c1_RB_104269_pCAS-PPO	wt	3	281	1	TRUE	1:9298591	forward	1	9298591	RB	2C1	5	TCAAA	0		0	Col-0	104269	pCAS-PPO	FALSE
2c1_RB_104269_pCAS-PPO	wt	4	80	1	TRUE	1:9358927	forward	1	9358927	RB	2C1	0		2	GA	0	Col-0	104269	pCAS-PPO	FALSE
2c1_RB_104269_pCAS-PPO	wt	4	302	1	TRUE	1:10381409	forward	1	10381409	RB	2C1	0		4	TTTA	-16	Col-0	104269	pCAS-PPO	FALSE
2c1_RB_104269_pCAS-PPO	wt	15	328	0.941176	TRUE	1:10679931	reverse	1	10679931	RB	2C1	0		3	ACA	2	Col-0	104269	pCAS-PPO	FALSE
2c1_RB_104269_pCAS-PPO	wt	35	391	0.916667	TRUE	1:10843724	reverse	1	10843724	RB	2C1	0		0		0	Col-0	104269	pCAS-PPO	FALSE
2c1_RB_104269_pCAS-PPO	wt	31	426	0.967742	TRUE	1:11536479	forward	1	11536479	RB	2C1	0		0		3	Col-0	104269	pCAS-PPO	FALSE
2c1_RB_104269_pCAS-PPO	wt	7	323	0.857143	TRUE	1:12008978	forward	1	12008978	RB	2C1	2	TA	0		-14	Col-0	104269	pCAS-PPO	FALSE
2c1_RB_104269_pCAS-PPO	wt	12	470	0.833333	TRUE	1:12583135	reverse	1	12583135	RB	2C1	0		0		0	Col-0	104269	pCAS-PPO	FALSE
2c1_RB_104269_pCAS-PPO	wt	4	272	1	TRUE	1:17289642	forward	1	17289642	RB	2C1	0		1	A	0	Col-0	104269	pCAS-PPO	FALSE
2c1_RB_104269_pCAS-PPO	wt	5	423	1	TRUE	1:17885730	forward	1	17885730	RB	2C1	0		7	GTTTGAC	1	Col-0	104269	pCAS-PPO	FALSE
2c1_RB_104269_pCAS-PPO	wt	4	321	0.75	TRUE	1:18447623	forward	1	18447623	RB	2C1	0		5	TTTGA	0	Col-0	104269	pCAS-PPO	FALSE
2c1_RB_104269_pCAS-PPO	wt	3	426	1	TRUE	1:18494365	reverse	1	18494365	RB	2C1	0		0		0	Col-0	104269	pCAS-PPO	FALSE
2c1_RB_104269_pCAS-PPO	wt	5	219	0.8	TRUE	1:18688267	reverse	1	18688267	RB	2C1	4	AACA	0		-4	Col-0	104269	pCAS-PPO	FALSE
2c1_RB_104269_pCAS-PPO	wt	3	322	1	TRUE	1:18812208	reverse	1	18812208	RB	2C1	11	ATATCAGTTAC	0		0	Col-0	104269	pCAS-PPO	FALSE
2c1_RB_104269_pCAS-PPO	wt	4	297	1	TRUE	1:20246617	forward	1	20246617	RB	2C1	0		3	AGT	-6	Col-0	104269	pCAS-PPO	FALSE
2c1_RB_104269_pCAS-PPO	wt	5	352	0.8	TRUE	1:20660600	forward	1	20660600	RB	2C1	0		3	TCA	-8	Col-0	104269	pCAS-PPO	FALSE
2c1_RB_104269_pCAS-PPO	wt	11	336	1	TRUE	1:20766136	forward	1	20766136	RB	2C1	0		1	A	0	Col-0	104269	pCAS-PPO	FALSE
2c1_RB_104269_pCAS-PPO	wt	19	610	0.894737	TRUE	1:20766133	reverse	1	20766133	RB	2C1	0		3	TGA	0	Col-0	104269	pCAS-PPO	FALSE
2c1_RB_104269_pCAS-PPO	wt	9	331	1	TRUE	1:20867771	forward	1	20867771	RB	2C1	26	GATTCATCCACCTCATCAACGATGTT	0		-12	Col-0	104269	pCAS-PPO	FALSE
2c1_RB_104269_pCAS-PPO	wt	43	531	0.860465	TRUE	1:20906887	forward	1	20906887	RB	2C1	13	CCCGCCTCCATGT	0		-3	Col-0	104269	pCAS-PPO	FALSE
2c1_RB_104269_pCAS-PPO	wt	15	280	0.857143	TRUE	1:22502747	forward	1	22502747	RB	2C1	0		0		-5	Col-0	104269	pCAS-PPO	FALSE
2c1_RB_104269_pCAS-PPO	wt	14	404	0.909091	TRUE	1:22502899	reverse	1	22502899	RB	2C1	3	ATA	0		-3	Col-0	104269	pCAS-PPO	FALSE
2c1_RB_104269_pCAS-PPO	wt	6	276	1	TRUE	1:23454584	reverse	1	23454584	RB	2C1	11	TTGTGGTGTAA	0		0	Col-0	104269	pCAS-PPO	FALSE
2c1_RB_104269_pCAS-PPO	wt	18	343	1	TRUE	1:23680575	reverse	1	23680575	RB	2C1	0		1	T	-19	Col-0	104269	pCAS-PPO	FALSE
2c1_RB_104269_pCAS-PPO	wt	3	222	1	TRUE	1:23724907	forward	1	23724907	RB	2C1	0		0		0	Col-0	104269	pCAS-PPO	FALSE
2c1_RB_104269_pCAS-PPO	wt	3	255	1	TRUE	1:24028689	reverse	1	24028689	RB	2C1	3	CGT	0		1	Col-0	104269	pCAS-PPO	FALSE
2c1_RB_104269_pCAS-PPO	wt	18	375	0.944444	TRUE	1:24271016	reverse	1	24271016	RB	2C1	0		4	TGTT	-3	Col-0	104269	pCAS-PPO	FALSE
2c1_RB_104269_pCAS-PPO	wt	32	545	0.90625	TRUE	1:24319241	forward	1	24319241	RB	2C1	0		1	A	0	Col-0	104269	pCAS-PPO	FALSE
2c1_RB_104269_pCAS-PPO	wt	3	385	1	TRUE	1:26112715	reverse	1	26112715	RB	2C1	14	ACAACAGCCCAGCT	0		-25	Col-0	104269	pCAS-PPO	FALSE
2c1_RB_104269_pCAS-PPO	wt	12	312	0.916667	TRUE	1:26174822	reverse	1	26174822	RB	2C1	0		1	A	0	Col-0	104269	pCAS-PPO	FALSE
2c1_RB_104269_pCAS-PPO	wt	14	509	0.928571	TRUE	1:26660965	reverse	1	26660965	RB	2C1	0		0		0	Col-0	104269	pCAS-PPO	FALSE
2c1_RB_104269_pCAS-PPO	wt	3	119	1	TRUE	1:26733164	forward	1	26733164	RB	2C1	0		9	ATTGTCGTT	-32	Col-0	104269	pCAS-PPO	FALSE
2c1_RB_104269_pCAS-PPO	wt	4	359	0.75	TRUE	1:27190970	reverse	1	27190970	RB	2C1	18	TAATATTGGACACCAGAA	0		0	Col-0	104269	pCAS-PPO	FALSE
2c1_RB_104269_pCAS-PPO	wt	3	168	1	TRUE	1:27659421	reverse	1	27659421	RB	2C1	10	ATGTTTGCGT	0		0	Col-0	104269	pCAS-PPO	FALSE
2c1_RB_104269_pCAS-PPO	wt	65	626	0.923077	TRUE	1:27931283	forward	1	27931283	RB	2C1	0		6	TTGACA	2	Col-0	104269	pCAS-PPO	FALSE
2c1_RB_104269_pCAS-PPO	wt	3	572	1	TRUE	1:27974259	reverse	1	27974259	RB	2C1	0		0		0	Col-0	104269	pCAS-PPO	FALSE
2c1_RB_104269_pCAS-PPO	wt	4	145	1	TRUE	1:28024891	forward	1	28024891	RB	2C1	0		8	TTCAGTTT	-17	Col-0	104269	pCAS-PPO	FALSE
2c1_RB_104269_pCAS-PPO	wt	3	219	1	TRUE	1:28024882	forward	1	28024882	RB	2C1	0		4	TATC	-9	Col-0	104269	pCAS-PPO	FALSE
2c1_RB_104269_pCAS-PPO	wt	3	237	1	TRUE	1:28549112	forward	1	28549112	RB	2C1	0		3	CAG	-7	Col-0	104269	pCAS-PPO	FALSE
2c1_RB_104269_pCAS-PPO	wt	9	282	1	TRUE	1:28747992	forward	1	28747992	RB	2C1	0		0		0	Col-0	104269	pCAS-PPO	FALSE
2c1_RB_104269_pCAS-PPO	wt	7	392	0.857143	TRUE	1:29117585	forward	1	29117585	RB	2C1	0		3	CCC	-28	Col-0	104269	pCAS-PPO	FALSE
2c1_RB_104269_pCAS-PPO	wt	3	249	0.75	TRUE	1:29741559	forward	1	29741559	RB	2C1	41	ATTTGTATTTATTGTGCACTTCAGCTTGGATCAGATTGTCG	0		-6	Col-0	104269	pCAS-PPO	FALSE
2c1_RB_104269_pCAS-PPO	wt	13	437	0.923077	TRUE	1:30025868	reverse	1	30025868	RB	2C1	0		5	ATCAG	-7	Col-0	104269	pCAS-PPO	FALSE
2c1_RB_104269_pCAS-PPO	wt	23	404	0.916667	TRUE	1:30030406	forward	1	30030406	RB	2C1	0		5	TCGTT	-32	Col-0	104269	pCAS-PPO	FALSE
2c1_RB_104269_pCAS-PPO	wt	23	395	1	TRUE	1:30030685	reverse	1	30030685	RB	2C1	0		5	CTTCA	-21	Col-0	104269	pCAS-PPO	FALSE
2c1_RB_104269_pCAS-PPO	wt	12	277	1	TRUE	1:30104483	reverse	1	30104483	RB	2C1	0		7	CTAAACT	-12	Col-0	104269	pCAS-PPO	FALSE
2c1_RB_104269_pCAS-PPO	wt	4	340	1	TRUE	1:30211917	forward	1	30211917	RB	2C1	10	AATTCAGTAC	0		-32	Col-0	104269	pCAS-PPO	FALSE
2c1_RB_104269_pCAS-PPO	wt	4	168	0.75	TRUE	1:30227473	forward	1	30227473	RB	2C1	0		4	TTTG	-1	Col-0	104269	pCAS-PPO	FALSE
2c1_RB_104269_pCAS-PPO	wt	4	239	1	TRUE	1:30296957	reverse	1	30296957	RB	2C1	0		5	TTTGA	0	Col-0	104269	pCAS-PPO	FALSE
2c1_RB_104269_pCAS-PPO	wt	20	426	0.95	TRUE	1:11613704	forward	1	11613704	RB	2C1	26	GCTTATAAAACGAGCGTTTAAACTTA	0		1	Col-0	104269	pCAS-PPO	FALSE
2c1_RB_104269_pCAS-PPO	wt	9	323	0.777778	TRUE	1:3957031	forward	1	3957031	RB	2C1	54	TAACACATTGTGGTGTAAACTATCAGTGTTTGAAGCTCTAAGCAGATTTGGAAT	0		0	Col-0	104269	pCAS-PPO	FALSE
2c1_RB_104269_pCAS-PPO	wt	4	243	0.75	TRUE	1:26140876	reverse	1	26140876	RB	2C1	44	TTGAATGTCGATTCATCGGTCCCACGAAGTTTTTGTGGACCATG	0		0	Col-0	104269	pCAS-PPO	FALSE
2c1_RB_104269_pCAS-PPO	wt	8	370	0.875	TRUE	1:16800951	reverse	1	16800951	RB	2C1	39	GCTTAGACAACTAAATCAAGGATACTAAATCCTATTTTC	0		1	Col-0	104269	pCAS-PPO	FALSE
2c1_RB_104269_pCAS-PPO	wt	5	451	1	TRUE	1:27364311	forward	1	27364311	RB	2C1	42	ACAATTTGTTTACACTAAGCGTCAATTTGTCGTTTCCCGCCT	0		0	Col-0	104269	pCAS-PPO	FALSE
2c1_RB_104269_pCAS-PPO	wt	6	327	1	TRUE	1:20262541	reverse	1	20262541	RB	2C1	50	CAATGTATAGACCACAATGTCGTTGTCTATACTGTACACCACAATTTGTT	0		-8	Col-0	104269	pCAS-PPO	FALSE
2c1_RB_104269_pCAS-PPO	wt	3	310	1	TRUE	1:24002020	forward	1	24002020	RB	2C1	46	GTTCTCTCTAGCCATTTCGATCACGATGTTCTCAGGCTTATGCTCT	0		0	Col-0	104269	pCAS-PPO	FALSE
2c1_RB_104269_pCAS-PPO	wt	4	292	1	TRUE	1:6709690	forward	1	6709690	RB	2C1	36	AATGAATTGCTCTAGCCAATACGCAATGTGTTTCAA	0		0	Col-0	104269	pCAS-PPO	FALSE
2c1_RB_104269_pCAS-PPO	wt	3	533	1	TRUE	1:11217590	reverse	1	11217590	RB	2C1	40	GCTTGAGCTTGGATCAGATTGTCCAATCATGTAATCCAGA	0		0	Col-0	104269	pCAS-PPO	FALSE
2c1_RB_104269_pCAS-PPO	wt	3	88	1	TRUE	2:10072	forward	2	10072	RB	2C1	0		1	A	0	Col-0	104269	pCAS-PPO	FALSE
2c1_RB_104269_pCAS-PPO	wt	6	209	1	TRUE	2:130165	reverse	2	130165	RB	2C1	14	CTAAACAAATATAA	0		-17	Col-0	104269	pCAS-PPO	FALSE
2c1_RB_104269_pCAS-PPO	wt	4	276	1	TRUE	2:704149	forward	2	704149	RB	2C1	0		0		0	Col-0	104269	pCAS-PPO	FALSE
2c1_RB_104269_pCAS-PPO	wt	18	345	0.944444	TRUE	2:1179978	forward	2	1179978	RB	2C1	0		0		0	Col-0	104269	pCAS-PPO	FALSE
2c1_RB_104269_pCAS-PPO	wt	9	501	0.77193	TRUE	2:3020475	forward	2	3020475	RB	2C1	14	TTAAACTATCCCCC	0		-6	Col-0	104269	pCAS-PPO	FALSE
2c1_RB_104269_pCAS-PPO	wt	25	473	0.92	TRUE	2:6758720	forward	2	6758720	RB	2C1	0		1	A	0	Col-0	104269	pCAS-PPO	FALSE
2c1_RB_104269_pCAS-PPO	wt	3	219	1	TRUE	2:6891281	reverse	2	6891281	RB	2C1	0		2	GA	0	Col-0	104269	pCAS-PPO	FALSE
2c1_RB_104269_pCAS-PPO	wt	7	307	1	TRUE	2:7511912	forward	2	7511912	RB	2C1	13	TCTCCTCAAGATC	0		0	Col-0	104269	pCAS-PPO	FALSE
2c1_RB_104269_pCAS-PPO	wt	6	379	1	TRUE	2:7661664	forward	2	7661664	RB	2C1	28	TCTTAATTAAGATCAAATTTATGATATA	0		-1	Col-0	104269	pCAS-PPO	FALSE
2c1_RB_104269_pCAS-PPO	wt	13	343	1	TRUE	2:8122324	forward	2	8122324	RB	2C1	15	AAGTTTAAACTGAAG	0		0	Col-0	104269	pCAS-PPO	FALSE
2c1_RB_104269_pCAS-PPO	wt	11	405	1	TRUE	2:8954294	forward	2	8954294	RB	2C1	2	GA	0		-10	Col-0	104269	pCAS-PPO	FALSE
2c1_RB_104269_pCAS-PPO	wt	8	431	1	TRUE	2:9292686	forward	2	9292686	RB	2C1	0		0		0	Col-0	104269	pCAS-PPO	FALSE
2c1_RB_104269_pCAS-PPO	wt	3	234	1	TRUE	2:10686054	forward	2	10686054	RB	2C1	5	TTATA	0		0	Col-0	104269	pCAS-PPO	FALSE
2c1_RB_104269_pCAS-PPO	wt	67	586	0.942029	TRUE	2:11728256	forward	2	11728256	RB	2C1	0		3	TTT	-2	Col-0	104269	pCAS-PPO	FALSE
2c1_RB_104269_pCAS-PPO	wt	6	393	1	TRUE	2:12307621	forward	2	12307621	RB	2C1	32	ATATTGTGTAACGCCTTCAGTTCAAACTTGCT	0		-5	Col-0	104269	pCAS-PPO	FALSE
2c1_RB_104269_pCAS-PPO	wt	9	305	0.888889	TRUE	2:12522787	reverse	2	12522787	RB	2C1	30	CCAGTTCATTGGGAGTTATACGCAAGTTTA	0		-5	Col-0	104269	pCAS-PPO	FALSE
2c1_RB_104269_pCAS-PPO	wt	5	227	1	TRUE	2:12528141	forward	2	12528141	RB	2C1	3	ACA	0		-11	Col-0	104269	pCAS-PPO	FALSE
2c1_RB_104269_pCAS-PPO	wt	12	352	1	TRUE	2:13168391	forward	2	13168391	RB	2C1	9	GTCCGCAAT	0		-13	Col-0	104269	pCAS-PPO	FALSE
2c1_RB_104269_pCAS-PPO	wt	3	256	1	TRUE	2:13702922	reverse	2	13702922	RB	2C1	14	TTACGATGCCCACA	0		-6	Col-0	104269	pCAS-PPO	FALSE
2c1_RB_104269_pCAS-PPO	wt	4	424	1	TRUE	2:14110078	reverse	2	14110078	RB	2C1	0		0		0	Col-0	104269	pCAS-PPO	FALSE
2c1_RB_104269_pCAS-PPO	wt	3	402	1	TRUE	2:14650526	reverse	2	14650526	RB	2C1	2	AA	0		0	Col-0	104269	pCAS-PPO	FALSE
2c1_RB_104269_pCAS-PPO	wt	5	282	1	TRUE	2:16328194	reverse	2	16328194	RB	2C1	0		0		0	Col-0	104269	pCAS-PPO	FALSE
2c1_RB_104269_pCAS-PPO	wt	22	549	1	TRUE	2:16369368	reverse	2	16369368	RB	2C1	18	AAGCGGGCAGCTCGGCGG	0		0	Col-0	104269	pCAS-PPO	FALSE
2c1_RB_104269_pCAS-PPO	wt	3	260	1	TRUE	2:17308461	forward	2	17308461	RB	2C1	0		0		0	Col-0	104269	pCAS-PPO	FALSE
2c1_RB_104269_pCAS-PPO	wt	6	334	1	TRUE	2:17718735	forward	2	17718735	RB	2C1	0		2	TG	-1	Col-0	104269	pCAS-PPO	FALSE
2c1_RB_104269_pCAS-PPO	wt	3	419	1	TRUE	2:17772361	reverse	2	17772361	RB	2C1	0		2	TA	-11	Col-0	104269	pCAS-PPO	FALSE
2c1_RB_104269_pCAS-PPO	wt	4	344	1	TRUE	2:17899402	forward	2	17899402	RB	2C1	0		1	A	0	Col-0	104269	pCAS-PPO	FALSE
2c1_RB_104269_pCAS-PPO	wt	13	339	1	TRUE	2:17899621	forward	2	17899621	RB	2C1	6	AATTGA	0		0	Col-0	104269	pCAS-PPO	FALSE
2c1_RB_104269_pCAS-PPO	wt	32	432	0.90625	TRUE	2:18254193	reverse	2	18254193	RB	2C1	5	AAACT	0		-4	Col-0	104269	pCAS-PPO	FALSE
2c1_RB_104269_pCAS-PPO	wt	4	289	0.8	TRUE	2:18523486	forward	2	18523486	RB	2C1	0		4	CCCG	-27	Col-0	104269	pCAS-PPO	FALSE
2c1_RB_104269_pCAS-PPO	wt	8	310	1	TRUE	2:18544167	forward	2	18544167	RB	2C1	0		0		0	Col-0	104269	pCAS-PPO	FALSE
2c1_RB_104269_pCAS-PPO	wt	25	637	0.92	TRUE	2:18613247	forward	2	18613247	RB	2C1	0		1	A	0	Col-0	104269	pCAS-PPO	FALSE
2c1_RB_104269_pCAS-PPO	wt	22	334	0.909091	TRUE	2:18613277	reverse	2	18613277	RB	2C1	0		0		0	Col-0	104269	pCAS-PPO	FALSE
2c1_RB_104269_pCAS-PPO	wt	3	326	1	TRUE	2:18637043	reverse	2	18637043	RB	2C1	0		0		0	Col-0	104269	pCAS-PPO	FALSE
2c1_RB_104269_pCAS-PPO	wt	7	317	1	TRUE	2:18742027	forward	2	18742027	RB	2C1	50	TACAAATGAATGCCGTCCTAAGCAATGCTCACATGTGAAAATATTACTCA	0		-17	Col-0	104269	pCAS-PPO	FALSE
2c1_RB_104269_pCAS-PPO	wt	113	458	0.920354	TRUE	2:18776223	forward	2	18776223	RB	2C1	0		2	GT	-6	Col-0	104269	pCAS-PPO	FALSE
2c1_RB_104269_pCAS-PPO	wt	22	373	0.954545	TRUE	2:19229541	forward	2	19229541	RB	2C1	0		1	A	0	Col-0	104269	pCAS-PPO	FALSE
2c1_RB_104269_pCAS-PPO	wt	20	635	0.952381	TRUE	2:19229550	reverse	2	19229550	RB	2C1	0		0		0	Col-0	104269	pCAS-PPO	FALSE
2c1_RB_104269_pCAS-PPO	wt	3	151	1	TRUE	2:15359671	reverse	2	15359671	RB	2C1	40	AGACATCTCTATTAGTCACCTTAACTTTTCAGTTTAAACT	0		-2	Col-0	104269	pCAS-PPO	FALSE
2c1_RB_104269_pCAS-PPO	wt	5	194	0.8	TRUE	2:2939743	reverse	2	2939743	RB	2C1	0		3	AAA	21	Col-0	104269	pCAS-PPO	FALSE
2c1_RB_104269_pCAS-PPO	wt	4	272	0.75	TRUE	2:18945440	reverse	2	18945440	RB	2C1	50	GTGGGTATTACCCTTTGTTGAAAAATAAGTATCAGTGTTTGACCACTTTA	0		1	Col-0	104269	pCAS-PPO	FALSE
2c1_RB_104269_pCAS-PPO	wt	3	469	1	TRUE	2:8026432	reverse	2	8026432	RB	2C1	56	ACAAGACTAGGCTAAACATGATTCTGTGCGATACTACGATATGTAATCAAGACCTA	0		-2	Col-0	104269	pCAS-PPO	FALSE
2c1_RB_104269_pCAS-PPO	wt	11	221	1	TRUE	3:88018	reverse	3	88018	RB	2C1	0		4	CGCC	-25	Col-0	104269	pCAS-PPO	FALSE
2c1_RB_104269_pCAS-PPO	wt	20	594	0.85	TRUE	3:504125	forward	3	504125	RB	2C1	0		7	TTTGACA	2	Col-0	104269	pCAS-PPO	FALSE
2c1_RB_104269_pCAS-PPO	wt	4	248	1	TRUE	3:562095	reverse	3	562095	RB	2C1	0		0		-6	Col-0	104269	pCAS-PPO	FALSE
2c1_RB_104269_pCAS-PPO	wt	3	342	1	TRUE	3:1024513	reverse	3	1024513	RB	2C1	14	GATTGTCGTTTCAT	0		-19	Col-0	104269	pCAS-PPO	FALSE
2c1_RB_104269_pCAS-PPO	wt	4	437	1	TRUE	3:1077964	forward	3	1077964	RB	2C1	0		0		0	Col-0	104269	pCAS-PPO	FALSE
2c1_RB_104269_pCAS-PPO	wt	46	349	0.891304	TRUE	3:1265638	reverse	3	1265638	RB	2C1	16	TTAAACTATCAGAGCT	0		-6	Col-0	104269	pCAS-PPO	FALSE
2c1_RB_104269_pCAS-PPO	wt	3	349	1	TRUE	3:1839265	reverse	3	1839265	RB	2C1	0		1	G	-1	Col-0	104269	pCAS-PPO	FALSE
2c1_RB_104269_pCAS-PPO	wt	4	222	1	TRUE	3:1985043	reverse	3	1985043	RB	2C1	0		0		0	Col-0	104269	pCAS-PPO	FALSE
2c1_RB_104269_pCAS-PPO	wt	8	376	0.875	TRUE	3:2572453	reverse	3	2572453	RB	2C1	14	AATACGACATGTTG	0		0	Col-0	104269	pCAS-PPO	FALSE
2c1_RB_104269_pCAS-PPO	wt	44	468	0.931818	TRUE	3:3280620	forward	3	3280620	RB	2C1	0		1	A	0	Col-0	104269	pCAS-PPO	FALSE
2c1_RB_104269_pCAS-PPO	wt	25	318	0.925926	TRUE	3:3280688	reverse	3	3280688	RB	2C1	0		3	AGT	-19	Col-0	104269	pCAS-PPO	FALSE
2c1_RB_104269_pCAS-PPO	wt	8	400	0.777778	TRUE	3:3412360	forward	3	3412360	RB	2C1	33	TATATATTATAAAGTTGTCTAAGCGTCAATTTG	0		0	Col-0	104269	pCAS-PPO	FALSE
2c1_RB_104269_pCAS-PPO	wt	13	300	1	TRUE	3:3586506	reverse	3	3586506	RB	2C1	2	AT	0		-4	Col-0	104269	pCAS-PPO	FALSE
2c1_RB_104269_pCAS-PPO	wt	3	270	1	TRUE	3:3649891	forward	3	3649891	RB	2C1	9	TTTAAACCG	0		-1	Col-0	104269	pCAS-PPO	FALSE
2c1_RB_104269_pCAS-PPO	wt	3	312	1	TRUE	3:3677505	forward	3	3677505	RB	2C1	0		0		0	Col-0	104269	pCAS-PPO	FALSE
2c1_RB_104269_pCAS-PPO	wt	32	370	1	TRUE	3:3701371	reverse	3	3701371	RB	2C1	0		1	G	-20	Col-0	104269	pCAS-PPO	FALSE
2c1_RB_104269_pCAS-PPO	wt	16	356	0.961538	TRUE	3:3874622	forward	3	3874622	RB	2C1	0		3	TGA	0	Col-0	104269	pCAS-PPO	FALSE
2c1_RB_104269_pCAS-PPO	wt	4	322	1	TRUE	3:3876630	reverse	3	3876630	RB	2C1	1	G	0		1	Col-0	104269	pCAS-PPO	FALSE
2c1_RB_104269_pCAS-PPO	wt	3	189	1	TRUE	3:3962521	reverse	3	3962521	RB	2C1	0		1	G	-1	Col-0	104269	pCAS-PPO	FALSE
2c1_RB_104269_pCAS-PPO	wt	13	318	0.923077	TRUE	3:4014214	reverse	3	4014214	RB	2C1	0		5	ATCAG	-7	Col-0	104269	pCAS-PPO	FALSE
2c1_RB_104269_pCAS-PPO	wt	12	463	0.916667	TRUE	3:4350695	forward	3	4350695	RB	2C1	16	TTTTATTGAGATTTGG	0		0	Col-0	104269	pCAS-PPO	FALSE
2c1_RB_104269_pCAS-PPO	wt	3	232	1	TRUE	3:4525136	forward	3	4525136	RB	2C1	0		3	TCA	-8	Col-0	104269	pCAS-PPO	FALSE
2c1_RB_104269_pCAS-PPO	wt	3	325	1	TRUE	3:5066980	reverse	3	5066980	RB	2C1	0		6	GTTTGA	0	Col-0	104269	pCAS-PPO	FALSE
2c1_RB_104269_pCAS-PPO	wt	6	315	0.833333	TRUE	3:5209735	forward	3	5209735	RB	2C1	0		0		0	Col-0	104269	pCAS-PPO	FALSE
2c1_RB_104269_pCAS-PPO	wt	3	341	1	TRUE	3:5495342	forward	3	5495342	RB	2C1	0		0		0	Col-0	104269	pCAS-PPO	FALSE
2c1_RB_104269_pCAS-PPO	wt	11	542	1	TRUE	3:6523849	reverse	3	6523849	RB	2C1	0		1	A	0	Col-0	104269	pCAS-PPO	FALSE
2c1_RB_104269_pCAS-PPO	wt	4	181	0.75	TRUE	3:9153351	reverse	3	9153351	RB	2C1	0		4	TCAG	-20	Col-0	104269	pCAS-PPO	FALSE
2c1_RB_104269_pCAS-PPO	wt	12	371	0.863636	TRUE	3:9589164	forward	3	9589164	RB	2C1	3	TCA	0		0	Col-0	104269	pCAS-PPO	FALSE
2c1_RB_104269_pCAS-PPO	wt	3	276	1	TRUE	3:11070946	forward	3	11070946	RB	2C1	0		0		-1	Col-0	104269	pCAS-PPO	FALSE
2c1_RB_104269_pCAS-PPO	wt	5	198	1	TRUE	3:11761016	forward	3	11761016	RB	2C1	0		0		0	Col-0	104269	pCAS-PPO	FALSE
2c1_RB_104269_pCAS-PPO	wt	3	223	1	TRUE	3:16421674	forward	3	16421674	RB	2C1	6	AATTTG	0		-13	Col-0	104269	pCAS-PPO	FALSE
2c1_RB_104269_pCAS-PPO	wt	11	328	1	TRUE	3:16886368	reverse	3	16886368	RB	2C1	0		2	GA	0	Col-0	104269	pCAS-PPO	FALSE
2c1_RB_104269_pCAS-PPO	wt	5	234	1	TRUE	3:17285293	forward	3	17285293	RB	2C1	18	CTGATAGAATCTTTTCTC	0		-4	Col-0	104269	pCAS-PPO	FALSE
2c1_RB_104269_pCAS-PPO	wt	4	275	1	TRUE	3:17316906	forward	3	17316906	RB	2C1	0		0		-1	Col-0	104269	pCAS-PPO	FALSE
2c1_RB_104269_pCAS-PPO	wt	9	379	0.888889	TRUE	3:17446591	reverse	3	17446591	RB	2C1	0		3	TGA	0	Col-0	104269	pCAS-PPO	FALSE
2c1_RB_104269_pCAS-PPO	wt	3	353	1	TRUE	3:19283087	forward	3	19283087	RB	2C1	13	AAACGTAATTATC	0		0	Col-0	104269	pCAS-PPO	FALSE
2c1_RB_104269_pCAS-PPO	wt	6	454	0.833333	TRUE	3:20050402	forward	3	20050402	RB	2C1	0		6	GTTTGA	0	Col-0	104269	pCAS-PPO	FALSE
2c1_RB_104269_pCAS-PPO	wt	3	341	1	TRUE	3:20778729	forward	3	20778729	RB	2C1	0		3	GAC	1	Col-0	104269	pCAS-PPO	FALSE
2c1_RB_104269_pCAS-PPO	wt	4	286	1	TRUE	3:21469131	forward	3	21469131	RB	2C1	0		1	C	1	Col-0	104269	pCAS-PPO	FALSE
2c1_RB_104269_pCAS-PPO	wt	7	644	0.857143	TRUE	3:21529379	forward	3	21529379	RB	2C1	0		2	GA	0	Col-0	104269	pCAS-PPO	FALSE
2c1_RB_104269_pCAS-PPO	wt	5	452	0.8	TRUE	3:21943432	forward	3	21943432	RB	2C1	0		1	C	1	Col-0	104269	pCAS-PPO	FALSE
2c1_RB_104269_pCAS-PPO	wt	3	210	1	TRUE	3:22006129	forward	3	22006129	RB	2C1	0		1	A	0	Col-0	104269	pCAS-PPO	FALSE
2c1_RB_104269_pCAS-PPO	wt	3	423	1	TRUE	3:23185762	reverse	3	23185762	RB	2C1	13	ATTGTCGTAGAAA	0		-7	Col-0	104269	pCAS-PPO	FALSE
2c1_RB_104269_pCAS-PPO	wt	8	278	0.875	TRUE	3:5955029	forward	3	5955029	RB	2C1	5	AGCTT	0		16	Col-0	104269	pCAS-PPO	FALSE
2c1_RB_104269_pCAS-PPO	wt	8	285	1	TRUE	3:15909771	reverse	3	15909771	RB	2C1	33	AAACACTGTTGACTGATGGGCTGCCTGTATCAT	0		0	Col-0	104269	pCAS-PPO	FALSE
2c1_RB_104269_pCAS-PPO	wt	5	275	1	TRUE	3:6524184	forward	3	6524184	RB	2C1	40	GGTGTAAACAAATTGGGTAACGCCAGTACACTGATAGTTT	0		-4	Col-0	104269	pCAS-PPO	FALSE
2c1_RB_104269_pCAS-PPO	wt	17	567	0.823529	TRUE	3:3018838	forward	3	3018838	RB	2C1	22	GAAGAGGATATATTGGCGGGTA	0		20	Col-0	104269	pCAS-PPO	FALSE
2c1_RB_104269_pCAS-PPO	wt	11	366	0.818182	TRUE	3:6038539	reverse	3	6038539	RB	2C1	46	ACTATCGTTTCCCAACAACGATTGTACAATTGCTATCCGAGAGAGA	0		0	Col-0	104269	pCAS-PPO	FALSE
2c1_RB_104269_pCAS-PPO	wt	7	273	0.888889	TRUE	3:6805414	forward	3	6805414	RB	2C1	46	TAACACATTCTGGCGGGAAACGACAATCACCACTCGATACAGGCAG	0		0	Col-0	104269	pCAS-PPO	FALSE
2c1_RB_104269_pCAS-PPO	wt	7	258	1	TRUE	3:8473784	reverse	3	8473784	RB	2C1	27	AACTATCAGTCACAATTCATAGTAAAC	0		0	Col-0	104269	pCAS-PPO	FALSE
2c1_RB_104269_pCAS-PPO	wt	4	268	0.75	TRUE	3:9008595	reverse	3	9008595	RB	2C1	47	TAAGAAGCACGAGAGGCACAATCTCCAGATCGGAATTATTTTTGTGT	0		0	Col-0	104269	pCAS-PPO	FALSE
2c1_RB_104269_pCAS-PPO	wt	3	430	1	TRUE	3:22325973	reverse	3	22325973	RB	2C1	57	TTAATGTATATATTACATTAAATGTAATTGTCTAAGCGTCAATTTGTTTACACCAAA	0		-2	Col-0	104269	pCAS-PPO	FALSE
2c1_RB_104269_pCAS-PPO	wt	97	515	0.918367	TRUE	4:405422	forward	4	405422	RB	2C1	34	CTCGAAGAGTCAGTTTAAACTCTGATAGCGCTCC	0		-7	Col-0	104269	pCAS-PPO	FALSE
2c1_RB_104269_pCAS-PPO	wt	6	345	1	TRUE	4:704530	reverse	4	704530	RB	2C1	12	AAGTCCATAGAG	0		-23	Col-0	104269	pCAS-PPO	FALSE
2c1_RB_104269_pCAS-PPO	wt	161	538	0.937888	TRUE	4:722506	reverse	4	722506	RB	2C1	0		1	A	0	Col-0	104269	pCAS-PPO	FALSE
2c1_RB_104269_pCAS-PPO	wt	7	302	0.875	TRUE	4:730110	forward	4	730110	RB	2C1	2	AT	0		0	Col-0	104269	pCAS-PPO	FALSE
2c1_RB_104269_pCAS-PPO	wt	95	445	0.94898	TRUE	4:730288	reverse	4	730288	RB	2C1	0		3	TCC	-29	Col-0	104269	pCAS-PPO	FALSE
2c1_RB_104269_pCAS-PPO	wt	4	328	1	TRUE	4:731154	forward	4	731154	RB	2C1	39	CAAACACTGATAGTTTGAAGGGACAAAAGGCGGGTTGAG	0		-18	Col-0	104269	pCAS-PPO	FALSE
2c1_RB_104269_pCAS-PPO	wt	7	251	1	TRUE	4:731628	forward	4	731628	RB	2C1	3	CTT	0		-20	Col-0	104269	pCAS-PPO	FALSE
2c1_RB_104269_pCAS-PPO	wt	102	687	0.796117	TRUE	4:731917	reverse	4	731917	RB	2C1	15	GATGTCAGCTCGATG	0		0	Col-0	104269	pCAS-PPO	FALSE
2c1_RB_104269_pCAS-PPO	wt	35	407	0.857143	TRUE	4:1114677	reverse	4	1114677	RB	2C1	0		7	ACTATCA	-8	Col-0	104269	pCAS-PPO	FALSE
2c1_RB_104269_pCAS-PPO	wt	7	386	1	TRUE	4:1217536	reverse	4	1217536	RB	2C1	0		5	GTGTT	-3	Col-0	104269	pCAS-PPO	FALSE
2c1_RB_104269_pCAS-PPO	wt	17	387	0.882353	TRUE	4:1257608	forward	4	1257608	RB	2C1	19	CCCTGTTCGTCGATTGTAG	0		-5	Col-0	104269	pCAS-PPO	FALSE
2c1_RB_104269_pCAS-PPO	wt	4	476	1	TRUE	4:2288408	forward	4	2288408	RB	2C1	0		1	T	-2	Col-0	104269	pCAS-PPO	FALSE
2c1_RB_104269_pCAS-PPO	wt	76	595	0.947368	TRUE	4:2718801	forward	4	2718801	RB	2C1	0		1	A	0	Col-0	104269	pCAS-PPO	FALSE
2c1_RB_104269_pCAS-PPO	wt	13	383	0.923077	TRUE	4:5804482	forward	4	5804482	RB	2C1	0		3	ATC	-9	Col-0	104269	pCAS-PPO	FALSE
2c1_RB_104269_pCAS-PPO	wt	4	427	1	TRUE	4:7556997	reverse	4	7556997	RB	2C1	0		1	A	-8	Col-0	104269	pCAS-PPO	FALSE
2c1_RB_104269_pCAS-PPO	wt	12	314	1	TRUE	4:10597591	reverse	4	10597591	RB	2C1	0		2	CA	-8	Col-0	104269	pCAS-PPO	FALSE
2c1_RB_104269_pCAS-PPO	wt	4	366	1	TRUE	4:11476215	forward	4	11476215	RB	2C1	0		3	TGA	0	Col-0	104269	pCAS-PPO	FALSE
2c1_RB_104269_pCAS-PPO	wt	21	322	0.952381	TRUE	4:11603365	forward	4	11603365	RB	2C1	0		1	G	-1	Col-0	104269	pCAS-PPO	FALSE
2c1_RB_104269_pCAS-PPO	wt	5	212	1	TRUE	4:11723534	reverse	4	11723534	RB	2C1	12	TAGATTGAAGGG	0		0	Col-0	104269	pCAS-PPO	FALSE
2c1_RB_104269_pCAS-PPO	wt	5	165	0.8	TRUE	4:11934288	forward	4	11934288	RB	2C1	0		0		-1	Col-0	104269	pCAS-PPO	FALSE
2c1_RB_104269_pCAS-PPO	wt	3	201	1	TRUE	4:12339995	forward	4	12339995	RB	2C1	0		0		0	Col-0	104269	pCAS-PPO	FALSE
2c1_RB_104269_pCAS-PPO	wt	109	523	0.974576	TRUE	4:12371188	forward	4	12371188	RB	2C1	0		2	CC	-25	Col-0	104269	pCAS-PPO	FALSE
2c1_RB_104269_pCAS-PPO	wt	4	281	0.75	TRUE	4:12969699	forward	4	12969699	RB	2C1	0		1	T	-2	Col-0	104269	pCAS-PPO	FALSE
2c1_RB_104269_pCAS-PPO	wt	4	270	1	TRUE	4:13024819	forward	4	13024819	RB	2C1	32	TTAGACAACTTAATAGTACACCCACTGCTAAT	0		-26	Col-0	104269	pCAS-PPO	FALSE
2c1_RB_104269_pCAS-PPO	wt	8	444	0.75	TRUE	4:13112342	forward	4	13112342	RB	2C1	24	ATAAGGGAATCTAGGCAGCCTGAT	0		-20	Col-0	104269	pCAS-PPO	FALSE
2c1_RB_104269_pCAS-PPO	wt	71	617	0.972973	TRUE	4:13703410	reverse	4	13703410	RB	2C1	0		3	CGC	-26	Col-0	104269	pCAS-PPO	FALSE
2c1_RB_104269_pCAS-PPO	wt	3	365	1	TRUE	4:13809137	forward	4	13809137	RB	2C1	0		7	TAAACTA	-11	Col-0	104269	pCAS-PPO	FALSE
2c1_RB_104269_pCAS-PPO	wt	19	321	0.947368	TRUE	4:14646790	forward	4	14646790	RB	2C1	0		4	TTTG	-1	Col-0	104269	pCAS-PPO	FALSE
2c1_RB_104269_pCAS-PPO	wt	5	299	0.8	TRUE	4:14830351	reverse	4	14830351	RB	2C1	1	T	0		0	Col-0	104269	pCAS-PPO	FALSE
2c1_RB_104269_pCAS-PPO	wt	51	629	0.960784	TRUE	4:14955936	reverse	4	14955936	RB	2C1	2	TT	0		0	Col-0	104269	pCAS-PPO	FALSE
2c1_RB_104269_pCAS-PPO	wt	4	225	1	TRUE	4:14993308	forward	4	14993308	RB	2C1	11	AATAGACAAAT	0		0	Col-0	104269	pCAS-PPO	FALSE
2c1_RB_104269_pCAS-PPO	wt	3	219	1	TRUE	4:16939825	forward	4	16939825	RB	2C1	0		0		-20	Col-0	104269	pCAS-PPO	FALSE
2c1_RB_104269_pCAS-PPO	wt	4	315	1	TRUE	4:17469065	reverse	4	17469065	RB	2C1	0		1	A	0	Col-0	104269	pCAS-PPO	FALSE
2c1_RB_104269_pCAS-PPO	wt	3	303	1	TRUE	4:17534980	forward	4	17534980	RB	2C1	0		3	TGA	0	Col-0	104269	pCAS-PPO	FALSE
2c1_RB_104269_pCAS-PPO	wt	3	341	1	TRUE	4:18068516	reverse	4	18068516	RB	2C1	0		0		0	Col-0	104269	pCAS-PPO	FALSE
2c1_RB_104269_pCAS-PPO	wt	3	163	1	TRUE	4:18191533	reverse	4	18191533	RB	2C1	14	ACTGATAGTTTACC	0		-13	Col-0	104269	pCAS-PPO	FALSE
2c1_RB_104269_pCAS-PPO	wt	22	282	0.926829	TRUE	4:18201919	forward	4	18201919	RB	2C1	21	CCGACACCAAATCTATATGCT	0		-9	Col-0	104269	pCAS-PPO	FALSE
2c1_RB_104269_pCAS-PPO	wt	75	651	0.864198	TRUE	4:15514946	forward	4	15514946	RB	2C1	42	CTCGTTGCCTTGGTAGCTCGAAGATCAAGTCTAACTTCGATC	0		-3	Col-0	104269	pCAS-PPO	FALSE
2c1_RB_104269_pCAS-PPO	wt	16	380	1	TRUE	4:14166636	forward	4	14166636	RB	2C1	0		3	AAC	22	Col-0	104269	pCAS-PPO	FALSE
2c1_RB_104269_pCAS-PPO	wt	4	120	1	TRUE	4:1408609	forward	4	1408609	RB	2C1	39	TACCACAAAACGACGGATTATGCGCGTGTTTACACCACA	0		0	Col-0	104269	pCAS-PPO	FALSE
2c1_RB_104269_pCAS-PPO	wt	78	617	0.910256	TRUE	5:26157	reverse	5	26157	RB	2C1	9	TAGCTACCG	0		-6	Col-0	104269	pCAS-PPO	FALSE
2c1_RB_104269_pCAS-PPO	wt	3	356	1	TRUE	5:341025	forward	5	341025	RB	2C1	13	TATAACGAGCGGT	0		-12	Col-0	104269	pCAS-PPO	FALSE
2c1_RB_104269_pCAS-PPO	wt	4	393	1	TRUE	5:750464	reverse	5	750464	RB	2C1	0		0		0	Col-0	104269	pCAS-PPO	FALSE
2c1_RB_104269_pCAS-PPO	wt	9	553	0.888889	TRUE	5:793935	reverse	5	793935	RB	2C1	0		1	A	0	Col-0	104269	pCAS-PPO	FALSE
2c1_RB_104269_pCAS-PPO	wt	4	219	1	TRUE	5:970106	forward	5	970106	RB	2C1	10	CCTTGTAACA	0		-20	Col-0	104269	pCAS-PPO	FALSE
2c1_RB_104269_pCAS-PPO	wt	4	257	1	TRUE	5:1743021	reverse	5	1743021	RB	2C1	0		4	TATC	-9	Col-0	104269	pCAS-PPO	FALSE
2c1_RB_104269_pCAS-PPO	wt	10	240	0.8	TRUE	5:1841127	reverse	5	1841127	RB	2C1	0		1	T	-2	Col-0	104269	pCAS-PPO	FALSE
2c1_RB_104269_pCAS-PPO	wt	33	486	0.969697	TRUE	5:1966790	forward	5	1966790	RB	2C1	11	AAATTATGGCC	0		-13	Col-0	104269	pCAS-PPO	FALSE
2c1_RB_104269_pCAS-PPO	wt	69	394	0.956522	TRUE	5:2027937	forward	5	2027937	RB	2C1	3	TTG	0		-2	Col-0	104269	pCAS-PPO	FALSE
2c1_RB_104269_pCAS-PPO	wt	3	154	1	TRUE	5:2125108	forward	5	2125108	RB	2C1	0		1	T	-2	Col-0	104269	pCAS-PPO	FALSE
2c1_RB_104269_pCAS-PPO	wt	14	309	1	TRUE	5:2656383	reverse	5	2656383	RB	2C1	0		0		0	Col-0	104269	pCAS-PPO	FALSE
2c1_RB_104269_pCAS-PPO	wt	6	505	0.833333	TRUE	5:2727187	reverse	5	2727187	RB	2C1	19	TGTCTAAGCGTCAATTTGT	0		-6	Col-0	104269	pCAS-PPO	FALSE
2c1_RB_104269_pCAS-PPO	wt	6	472	0.833333	TRUE	5:2813280	reverse	5	2813280	RB	2C1	0		3	TGA	0	Col-0	104269	pCAS-PPO	FALSE
2c1_RB_104269_pCAS-PPO	wt	24	375	0.96	TRUE	5:3805262	reverse	5	3805262	RB	2C1	0		0		-3	Col-0	104269	pCAS-PPO	FALSE
2c1_RB_104269_pCAS-PPO	wt	10	328	0.9	TRUE	5:3902974	forward	5	3902974	RB	2C1	16	GTCGTGAAGGTGAGAA	0		-13	Col-0	104269	pCAS-PPO	FALSE
2c1_RB_104269_pCAS-PPO	wt	4	287	1	TRUE	5:4560563	reverse	5	4560563	RB	2C1	47	ATACACAAAATTGTTGCGTATTGGCTGTAATTTCTCAATGTGTCATT	0		-21	Col-0	104269	pCAS-PPO	FALSE
2c1_RB_104269_pCAS-PPO	wt	7	447	1	TRUE	5:5269839	reverse	5	5269839	RB	2C1	6	CACCTG	0		-4	Col-0	104269	pCAS-PPO	FALSE
2c1_RB_104269_pCAS-PPO	wt	11	235	1	TRUE	5:5850561	reverse	5	5850561	RB	2C1	0		2	AC	-13	Col-0	104269	pCAS-PPO	FALSE
2c1_RB_104269_pCAS-PPO	wt	3	325	1	TRUE	5:5972505	forward	5	5972505	RB	2C1	0		1	A	0	Col-0	104269	pCAS-PPO	FALSE
2c1_RB_104269_pCAS-PPO	wt	7	334	0.857143	TRUE	5:6269571	forward	5	6269571	RB	2C1	0		1	A	0	Col-0	104269	pCAS-PPO	FALSE
2c1_RB_104269_pCAS-PPO	wt	5	370	1	TRUE	5:6374230	reverse	5	6374230	RB	2C1	0		1	T	-4	Col-0	104269	pCAS-PPO	FALSE
2c1_RB_104269_pCAS-PPO	wt	3	362	1	TRUE	5:6571144	forward	5	6571144	RB	2C1	9	TCCTTGTTA	0		-31	Col-0	104269	pCAS-PPO	FALSE
2c1_RB_104269_pCAS-PPO	wt	4	247	1	TRUE	5:7730897	reverse	5	7730897	RB	2C1	0		4	CAGT	-6	Col-0	104269	pCAS-PPO	FALSE
2c1_RB_104269_pCAS-PPO	wt	6	302	0.833333	TRUE	5:8381355	reverse	5	8381355	RB	2C1	0		1	T	-17	Col-0	104269	pCAS-PPO	FALSE
2c1_RB_104269_pCAS-PPO	wt	3	240	1	TRUE	5:8963836	forward	5	8963836	RB	2C1	0		4	TTGA	0	Col-0	104269	pCAS-PPO	FALSE
2c1_RB_104269_pCAS-PPO	wt	17	328	0.941176	TRUE	5:9205830	forward	5	9205830	RB	2C1	0		3	GTG	-5	Col-0	104269	pCAS-PPO	FALSE
2c1_RB_104269_pCAS-PPO	wt	3	355	1	TRUE	5:9339806	forward	5	9339806	RB	2C1	27	TATTGTGTATATAATTCGTTTCCCGCC	0		-1	Col-0	104269	pCAS-PPO	FALSE
2c1_RB_104269_pCAS-PPO	wt	10	358	0.833333	TRUE	5:9775774	reverse	5	9775774	RB	2C1	0		3	CTT	-23	Col-0	104269	pCAS-PPO	FALSE
2c1_RB_104269_pCAS-PPO	wt	6	208	1	TRUE	5:9808477	forward	5	9808477	RB	2C1	0		2	CT	-12	Col-0	104269	pCAS-PPO	FALSE
2c1_RB_104269_pCAS-PPO	wt	3	238	1	TRUE	5:9943966	reverse	5	9943966	RB	2C1	0		2	CA	-21	Col-0	104269	pCAS-PPO	FALSE
2c1_RB_104269_pCAS-PPO	wt	8	287	0.875	TRUE	5:16206715	forward	5	16206715	RB	2C1	0		1	A	0	Col-0	104269	pCAS-PPO	FALSE
2c1_RB_104269_pCAS-PPO	wt	9	580	1	TRUE	5:17447497	reverse	5	17447497	RB	2C1	0		3	TGA	0	Col-0	104269	pCAS-PPO	FALSE
2c1_RB_104269_pCAS-PPO	wt	3	147	1	TRUE	5:18018109	forward	5	18018109	RB	2C1	2	AC	0		0	Col-0	104269	pCAS-PPO	FALSE
2c1_RB_104269_pCAS-PPO	wt	4	349	1	TRUE	5:19425874	forward	5	19425874	RB	2C1	0		0		0	Col-0	104269	pCAS-PPO	FALSE
2c1_RB_104269_pCAS-PPO	wt	40	424	0.902439	TRUE	5:19807921	reverse	5	19807921	RB	2C1	0		1	A	0	Col-0	104269	pCAS-PPO	FALSE
2c1_RB_104269_pCAS-PPO	wt	5	169	1	TRUE	5:20111246	forward	5	20111246	RB	2C1	8	CAAATTGT	0		-8	Col-0	104269	pCAS-PPO	FALSE
2c1_RB_104269_pCAS-PPO	wt	12	491	0.833333	TRUE	5:21502685	forward	5	21502685	RB	2C1	0		2	GA	0	Col-0	104269	pCAS-PPO	FALSE
2c1_RB_104269_pCAS-PPO	wt	3	247	1	TRUE	5:21598497	reverse	5	21598497	RB	2C1	0		1	A	0	Col-0	104269	pCAS-PPO	FALSE
2c1_RB_104269_pCAS-PPO	wt	3	252	1	TRUE	5:21973184	forward	5	21973184	RB	2C1	10	TTGAAGGCGG	0		-1	Col-0	104269	pCAS-PPO	FALSE
2c1_RB_104269_pCAS-PPO	wt	17	420	0.888889	TRUE	5:22099858	reverse	5	22099858	RB	2C1	0		1	A	0	Col-0	104269	pCAS-PPO	FALSE
2c1_RB_104269_pCAS-PPO	wt	5	157	1	TRUE	5:22142857	reverse	5	22142857	RB	2C1	0		1	C	1	Col-0	104269	pCAS-PPO	FALSE
2c1_RB_104269_pCAS-PPO	wt	3	425	1	TRUE	5:22789435	forward	5	22789435	RB	2C1	11	AATTTAAGTCG	0		-7	Col-0	104269	pCAS-PPO	FALSE
2c1_RB_104269_pCAS-PPO	wt	6	492	1	TRUE	5:22936452	forward	5	22936452	RB	2C1	0		5	TTTGA	0	Col-0	104269	pCAS-PPO	FALSE
2c1_RB_104269_pCAS-PPO	wt	9	360	1	TRUE	5:23235751	reverse	5	23235751	RB	2C1	9	AGGCGGGAA	0		0	Col-0	104269	pCAS-PPO	FALSE
2c1_RB_104269_pCAS-PPO	wt	10	465	0.9	TRUE	5:23453410	reverse	5	23453410	RB	2C1	0		0		-4	Col-0	104269	pCAS-PPO	FALSE
2c1_RB_104269_pCAS-PPO	wt	5	422	1	TRUE	5:23627205	reverse	5	23627205	RB	2C1	25	TCTAAGCTTTAGACACCAGTTCCGC	0		-1	Col-0	104269	pCAS-PPO	FALSE
2c1_RB_104269_pCAS-PPO	wt	7	406	0.857143	TRUE	5:24516025	forward	5	24516025	RB	2C1	0		1	A	0	Col-0	104269	pCAS-PPO	FALSE
2c1_RB_104269_pCAS-PPO	wt	3	151	1	TRUE	5:25521661	forward	5	25521661	RB	2C1	0		1	C	1	Col-0	104269	pCAS-PPO	FALSE
2c1_RB_104269_pCAS-PPO	wt	9	367	0.777778	TRUE	5:25678508	reverse	5	25678508	RB	2C1	0		6	AAACTA	-11	Col-0	104269	pCAS-PPO	FALSE
2c1_RB_104269_pCAS-PPO	wt	3	248	1	TRUE	5:25840655	reverse	5	25840655	RB	2C1	0		4	ATCA	-8	Col-0	104269	pCAS-PPO	FALSE
2c1_RB_104269_pCAS-PPO	wt	6	321	1	TRUE	5:25843881	reverse	5	25843881	RB	2C1	0		3	TTT	-2	Col-0	104269	pCAS-PPO	FALSE
2c1_RB_104269_pCAS-PPO	wt	28	386	0.928571	TRUE	5:26042441	reverse	5	26042441	RB	2C1	0		5	GTGTT	-3	Col-0	104269	pCAS-PPO	FALSE
2c1_RB_104269_pCAS-PPO	wt	9	364	1	TRUE	5:26112023	forward	5	26112023	RB	2C1	0		1	T	-2	Col-0	104269	pCAS-PPO	FALSE
2c1_RB_104269_pCAS-PPO	wt	124	331	0.94964	TRUE	5:26392962	forward	5	26392962	RB	2C1	0		0		0	Col-0	104269	pCAS-PPO	FALSE
2c1_RB_104269_pCAS-PPO	wt	3	567	1	TRUE	5:26487474	reverse	5	26487474	RB	2C1	0		7	TCAGTGT	-4	Col-0	104269	pCAS-PPO	FALSE
2c1_RB_104269_pCAS-PPO	wt	11	404	1	TRUE	5:26510078	forward	5	26510078	RB	2C1	0		0		0	Col-0	104269	pCAS-PPO	FALSE
2c1_RB_104269_pCAS-PPO	wt	75	627	0.933333	TRUE	5:26589023	forward	5	26589023	RB	2C1	0		2	GA	0	Col-0	104269	pCAS-PPO	FALSE
2c1_RB_104269_pCAS-PPO	wt	6	281	1	TRUE	5:26676573	forward	5	26676573	RB	2C1	0		0		0	Col-0	104269	pCAS-PPO	FALSE
2c1_RB_104269_pCAS-PPO	wt	4	320	1	TRUE	5:26732294	forward	5	26732294	RB	2C1	0		0		0	Col-0	104269	pCAS-PPO	FALSE
2c1_RB_104269_pCAS-PPO	wt	14	293	0.785714	TRUE	5:26812409	forward	5	26812409	RB	2C1	2	AT	0		0	Col-0	104269	pCAS-PPO	FALSE
2c1_RB_104269_pCAS-PPO	wt	5	352	1	TRUE	5:26917137	reverse	5	26917137	RB	2C1	0		3	TTT	-2	Col-0	104269	pCAS-PPO	FALSE
2c1_RB_104269_pCAS-PPO	wt	28	617	0.933333	TRUE	5:940006	forward	5	940006	RB	2C1	56	AATACATATATACTTTCAGAATATAAATGTGAAAAAATCAAATGGTCACATTGCGG	0		-2	Col-0	104269	pCAS-PPO	FALSE
2c1_RB_104269_pCAS-PPO	wt	4	220	1	TRUE	5:16934468	reverse	5	16934468	RB	2C1	33	AAAGAGTCCAAGCGAGAAATATAAGAAACCCTG	0		0	Col-0	104269	pCAS-PPO	FALSE
2c1_RB_104269_pCAS-PPO	wt	5	221	0.8	TRUE	5:2131791	reverse	5	2131791	RB	2C1	38	TGGTGTAAACAAATTGACGCTTAGACAACTTAATAACA	0		12	Col-0	104269	pCAS-PPO	FALSE
2c1_RB_104269_pCAS-PPO	wt	5	312	1	TRUE	5:3409036	forward	5	3409036	RB	2C1	38	ATACTTGCGACTAGAAGCGTCAGATTTTGTCGTTTCCC	0		0	Col-0	104269	pCAS-PPO	FALSE
2c1_RB_104269_pCAS-PPO	wt	3	231	1	TRUE	5:3611426	reverse	5	3611426	RB	2C1	0		7	TTATTAG	46	Col-0	104269	pCAS-PPO	FALSE
2c1_RB_104269_pCAS-PPO	wt	9	255	1	TRUE	Mt:15973	reverse	Mt	15973	RB	2C1	0		2	GA	0	Col-0	104269	pCAS-PPO	FALSE
2c1_RB_104269_pCAS-PPO	wt	17	470	0.931034	TRUE	Mt:343735	forward	Mt	343735	RB	2C1	0		1	A	0	Col-0	104269	pCAS-PPO	FALSE
LZ31-1-L_104269_pUBC-YFP-mod0	ku70	4	264	1	TRUE	1:187053	reverse	1	187053	LB	LZ31-1	0		3	AGC	-30	Col-0	104269	pUBC-YFP-mod0	FALSE
LZ31-1-L_104269_pUBC-YFP-mod0	ku70	3	323	1	TRUE	1:594153	reverse	1	594153	LB	LZ31-1	0		5	AATTT	-22	Col-0	104269	pUBC-YFP-mod0	FALSE
LZ31-1-L_104269_pUBC-YFP-mod0	ku70	5	373	1	TRUE	1:1790264	reverse	1	1790264	LB	LZ31-1	0		3	AGC	-30	Col-0	104269	pUBC-YFP-mod0	FALSE
LZ31-1-L_104269_pUBC-YFP-mod0	ku70	3	214	1	TRUE	1:1861988	forward	1	1861988	LB	LZ31-1	40	TTAGACAACTTAATAACACATTGGCCTCTTCGTGCCAATA	0		-54	Col-0	104269	pUBC-YFP-mod0	FALSE
LZ31-1-L_104269_pUBC-YFP-mod0	ku70	6	324	1	TRUE	1:2200115	forward	1	2200115	LB	LZ31-1	0		3	GTC	-35	Col-0	104269	pUBC-YFP-mod0	FALSE
LZ31-1-L_104269_pUBC-YFP-mod0	ku70	4	264	1	TRUE	1:3247830	forward	1	3247830	LB	LZ31-1	0		3	GTT	-46	Col-0	104269	pUBC-YFP-mod0	FALSE
LZ31-1-L_104269_pUBC-YFP-mod0	ku70	28	442	0.903226	TRUE	1:4048915	reverse	1	4048915	LB	LZ31-1	0		4	TTTA	-17	Col-0	104269	pUBC-YFP-mod0	FALSE
LZ31-1-L_104269_pUBC-YFP-mod0	ku70	7	389	1	TRUE	1:7019835	reverse	1	7019835	LB	LZ31-1	14	ACGTCCACAATTTG	0		-32	Col-0	104269	pUBC-YFP-mod0	FALSE
LZ31-1-L_104269_pUBC-YFP-mod0	ku70	3	202	1	TRUE	1:7584442	forward	1	7584442	LB	LZ31-1	0		5	TCTAA	-32	Col-0	104269	pUBC-YFP-mod0	FALSE
LZ31-1-L_104269_pUBC-YFP-mod0	ku70	3	414	1	TRUE	1:7660281	reverse	1	7660281	LB	LZ31-1	0		2	TG	-50	Col-0	104269	pUBC-YFP-mod0	FALSE
LZ31-1-L_104269_pUBC-YFP-mod0	ku70	4	140	1	TRUE	1:7728538	reverse	1	7728538	LB	LZ31-1	6	TAGATA	0		-53	Col-0	104269	pUBC-YFP-mod0	FALSE
LZ31-1-L_104269_pUBC-YFP-mod0	ku70	4	202	1	TRUE	1:7728550	reverse	1	7728550	LB	LZ31-1	18	TAGATTGACCAATAATTT	0		-53	Col-0	104269	pUBC-YFP-mod0	FALSE
LZ31-1-L_104269_pUBC-YFP-mod0	ku70	12	368	0.916667	TRUE	1:7826294	forward	1	7826294	LB	LZ31-1	0		6	GTCAAT	-24	Col-0	104269	pUBC-YFP-mod0	FALSE
LZ31-1-L_104269_pUBC-YFP-mod0	ku70	7	360	0.875	TRUE	1:8293294	forward	1	8293294	LB	LZ31-1	0		3	TTG	-37	Col-0	104269	pUBC-YFP-mod0	FALSE
LZ31-1-L_104269_pUBC-YFP-mod0	ku70	3	142	1	TRUE	1:8575279	reverse	1	8575279	LB	LZ31-1	5	TTATT	0		-46	Col-0	104269	pUBC-YFP-mod0	FALSE
LZ31-1-L_104269_pUBC-YFP-mod0	ku70	16	315	1	TRUE	1:9044563	forward	1	9044563	LB	LZ31-1	0		4	TTAT	-44	Col-0	104269	pUBC-YFP-mod0	FALSE
LZ31-1-L_104269_pUBC-YFP-mod0	ku70	5	173	1	TRUE	1:9239912	forward	1	9239912	LB	LZ31-1	0		8	TCTATTTG	-21	Col-0	104269	pUBC-YFP-mod0	FALSE
LZ31-1-L_104269_pUBC-YFP-mod0	ku70	5	209	1	TRUE	1:12699666	reverse	1	12699666	LB	LZ31-1	0		2	TT	-23	Col-0	104269	pUBC-YFP-mod0	FALSE
LZ31-1-L_104269_pUBC-YFP-mod0	ku70	13	256	0.923077	TRUE	1:20559427	reverse	1	20559427	LB	LZ31-1	3	CTT	0		-25	Col-0	104269	pUBC-YFP-mod0	FALSE
LZ31-1-L_104269_pUBC-YFP-mod0	ku70	4	374	1	TRUE	1:21968005	forward	1	21968005	LB	LZ31-1	20	CGTCCGCAATGTGTTATTAA	0		-7	Col-0	104269	pUBC-YFP-mod0	FALSE
LZ31-1-L_104269_pUBC-YFP-mod0	ku70	5	309	1	TRUE	1:21968030	reverse	1	21968030	LB	LZ31-1	0		0		-26	Col-0	104269	pUBC-YFP-mod0	FALSE
LZ31-1-L_104269_pUBC-YFP-mod0	ku70	4	282	1	TRUE	1:22752138	forward	1	22752138	LB	LZ31-1	0		3	AAA	-62	Col-0	104269	pUBC-YFP-mod0	FALSE
LZ31-1-L_104269_pUBC-YFP-mod0	ku70	3	277	1	TRUE	1:23011609	forward	1	23011609	LB	LZ31-1	0		2	TT	-38	Col-0	104269	pUBC-YFP-mod0	FALSE
LZ31-1-L_104269_pUBC-YFP-mod0	ku70	4	166	1	TRUE	1:23542953	reverse	1	23542953	LB	LZ31-1	0		3	AAT	-24	Col-0	104269	pUBC-YFP-mod0	FALSE
LZ31-1-L_104269_pUBC-YFP-mod0	ku70	3	377	0.75	TRUE	1:25651193	reverse	1	25651193	LB	LZ31-1	0		3	CGT	-28	Col-0	104269	pUBC-YFP-mod0	FALSE
LZ31-1-L_104269_pUBC-YFP-mod0	ku70	29	507	0.965517	TRUE	1:26483153	reverse	1	26483153	LB	LZ31-1	4	CTGA	0		-40	Col-0	104269	pUBC-YFP-mod0	FALSE
LZ31-1-L_104269_pUBC-YFP-mod0	ku70	3	367	1	TRUE	1:26588611	reverse	1	26588611	LB	LZ31-1	0		5	ACATT	-66	Col-0	104269	pUBC-YFP-mod0	FALSE
LZ31-1-L_104269_pUBC-YFP-mod0	ku70	15	316	0.933333	TRUE	1:27532268	forward	1	27532268	LB	LZ31-1	0		0		-26	Col-0	104269	pUBC-YFP-mod0	FALSE
LZ31-1-L_104269_pUBC-YFP-mod0	ku70	4	228	1	TRUE	1:27715566	forward	1	27715566	LB	LZ31-1	0		6	TCTAAG	-31	Col-0	104269	pUBC-YFP-mod0	FALSE
LZ31-1-L_104269_pUBC-YFP-mod0	ku70	3	310	1	TRUE	1:27715554	forward	1	27715554	LB	LZ31-1	0		1	T	-24	Col-0	104269	pUBC-YFP-mod0	FALSE
LZ31-1-L_104269_pUBC-YFP-mod0	ku70	8	229	1	TRUE	1:27788866	forward	1	27788866	LB	LZ31-1	0		6	CAATTT	-22	Col-0	104269	pUBC-YFP-mod0	FALSE
LZ31-1-L_104269_pUBC-YFP-mod0	ku70	3	386	1	TRUE	1:28163395	reverse	1	28163395	LB	LZ31-1	0		3	TTG	-37	Col-0	104269	pUBC-YFP-mod0	FALSE
LZ31-1-L_104269_pUBC-YFP-mod0	ku70	4	202	1	TRUE	1:28182567	reverse	1	28182567	LB	LZ31-1	5	GGTAC	0		-57	Col-0	104269	pUBC-YFP-mod0	FALSE
LZ31-1-L_104269_pUBC-YFP-mod0	ku70	35	503	1	TRUE	1:28187717	forward	1	28187717	LB	LZ31-1	0		2	AG	-40	Col-0	104269	pUBC-YFP-mod0	FALSE
LZ31-1-L_104269_pUBC-YFP-mod0	ku70	3	289	1	TRUE	1:28812184	reverse	1	28812184	LB	LZ31-1	0		1	A	-45	Col-0	104269	pUBC-YFP-mod0	FALSE
LZ31-1-L_104269_pUBC-YFP-mod0	ku70	8	377	1	TRUE	1:29498119	reverse	1	29498119	LB	LZ31-1	15	ATAAATCTATTACAT	0		-37	Col-0	104269	pUBC-YFP-mod0	FALSE
LZ31-1-L_104269_pUBC-YFP-mod0	ku70	3	326	1	TRUE	1:30226208	forward	1	30226208	LB	LZ31-1	0		4	AGCG	-29	Col-0	104269	pUBC-YFP-mod0	FALSE
LZ31-1-L_104269_pUBC-YFP-mod0	ku70	15	526	0.8	TRUE	1:23940839	reverse	1	23940839	LB	LZ31-1	1	T	0		0	Col-0	104269	pUBC-YFP-mod0	FALSE
LZ31-1-L_104269_pUBC-YFP-mod0	ku70	10	371	1	TRUE	1:30111718	forward	1	30111718	LB	LZ31-1	3	AAA	0		-7	Col-0	104269	pUBC-YFP-mod0	FALSE
LZ31-1-L_104269_pUBC-YFP-mod0	ku70	18	381	1	TRUE	1:2775945	reverse	1	2775945	LB	LZ31-1	1	G	0		-7	Col-0	104269	pUBC-YFP-mod0	FALSE
LZ31-1-L_104269_pUBC-YFP-mod0	ku70	10	342	1	TRUE	1:2775921	forward	1	2775921	LB	LZ31-1	0		1	C	-3	Col-0	104269	pUBC-YFP-mod0	FALSE
LZ31-1-L_104269_pUBC-YFP-mod0	ku70	15	242	0.875	TRUE	1:10028993	forward	1	10028993	LB	LZ31-1	3	TGT	0		-4	Col-0	104269	pUBC-YFP-mod0	FALSE
LZ31-1-L_104269_pUBC-YFP-mod0	ku70	5	220	0.8	TRUE	1:1031439	forward	1	1031439	LB	LZ31-1	8	AAAAGCAT	0		-3	Col-0	104269	pUBC-YFP-mod0	FALSE
LZ31-1-L_104269_pUBC-YFP-mod0	ku70	9	352	0.888889	TRUE	1:6334112	reverse	1	6334112	LB	LZ31-1	0		5	TTACA	-15	Col-0	104269	pUBC-YFP-mod0	FALSE
LZ31-1-L_104269_pUBC-YFP-mod0	ku70	16	346	0.941176	TRUE	1:6626547	forward	1	6626547	LB	LZ31-1	7	CGTCCGC	0		2	Col-0	104269	pUBC-YFP-mod0	FALSE
LZ31-1-L_104269_pUBC-YFP-mod0	ku70	17	577	0.941176	TRUE	1:7030349	reverse	1	7030349	LB	LZ31-1	4	TATA	0		0	Col-0	104269	pUBC-YFP-mod0	FALSE
LZ31-1-L_104269_pUBC-YFP-mod0	ku70	3	169	1	TRUE	1:28338095	forward	1	28338095	LB	LZ31-1	8	GATGATAG	0		-6	Col-0	104269	pUBC-YFP-mod0	FALSE
LZ31-1-L_104269_pUBC-YFP-mod0	ku70	3	357	1	TRUE	1:4352251	reverse	1	4352251	LB	LZ31-1	9	AATTGACGC	0		0	Col-0	104269	pUBC-YFP-mod0	FALSE
LZ31-1-L_104269_pUBC-YFP-mod0	ku70	21	519	0.952381	TRUE	1:20858306	reverse	1	20858306	LB	LZ31-1	11	CGATGATCCTT	0		-21	Col-0	104269	pUBC-YFP-mod0	FALSE
LZ31-1-L_104269_pUBC-YFP-mod0	ku70	6	337	0.833333	TRUE	1:3087684	reverse	1	3087684	LB	LZ31-1	25	CCTAGTTCATTTGGATGGACGAAAT	0		-35	Col-0	104269	pUBC-YFP-mod0	FALSE
LZ31-1-L_104269_pUBC-YFP-mod0	ku70	6	244	1	TRUE	1:11244178	reverse	1	11244178	LB	LZ31-1	19	ACAATTTGCCTAATAGTTC	0		-3	Col-0	104269	pUBC-YFP-mod0	FALSE
LZ31-1-L_104269_pUBC-YFP-mod0	ku70	5	372	1	TRUE	1:18739451	forward	1	18739451	LB	LZ31-1	3	AAG	0		0	Col-0	104269	pUBC-YFP-mod0	FALSE
LZ31-1-L_104269_pUBC-YFP-mod0	ku70	11	375	1	TRUE	1:22088859	forward	1	22088859	LB	LZ31-1	0		3	TCC	-2	Col-0	104269	pUBC-YFP-mod0	FALSE
LZ31-1-L_104269_pUBC-YFP-mod0	ku70	17	323	0.882353	TRUE	1:20786491	forward	1	20786491	LB	LZ31-1	6	TGTTGT	0		-6	Col-0	104269	pUBC-YFP-mod0	FALSE
LZ31-1-L_104269_pUBC-YFP-mod0	ku70	8	313	0.875	TRUE	1:26804781	reverse	1	26804781	LB	LZ31-1	0		3	TCC	-2	Col-0	104269	pUBC-YFP-mod0	FALSE
LZ31-1-L_104269_pUBC-YFP-mod0	ku70	6	205	0.833333	TRUE	1:7989293	reverse	1	7989293	LB	LZ31-1	1	G	0		-6	Col-0	104269	pUBC-YFP-mod0	FALSE
LZ31-1-L_104269_pUBC-YFP-mod0	ku70	13	212	1	TRUE	1:27532312	reverse	1	27532312	LB	LZ31-1	1	G	0		-2	Col-0	104269	pUBC-YFP-mod0	FALSE
LZ31-1-L_104269_pUBC-YFP-mod0	ku70	4	229	1	TRUE	1:28466171	reverse	1	28466171	LB	LZ31-1	26	GGCGCCGGCTCGGGACCAACTTCACC	0		-6	Col-0	104269	pUBC-YFP-mod0	FALSE
LZ31-1-L_104269_pUBC-YFP-mod0	ku70	4	149	1	TRUE	1:5548235	reverse	1	5548235	LB	LZ31-1	0		3	CAC	-11	Col-0	104269	pUBC-YFP-mod0	FALSE
LZ31-1-L_104269_pUBC-YFP-mod0	ku70	3	246	1	TRUE	1:28081616	reverse	1	28081616	LB	LZ31-1	0		3	ATA	-5	Col-0	104269	pUBC-YFP-mod0	FALSE
LZ31-1-L_104269_pUBC-YFP-mod0	ku70	15	341	0.75	TRUE	1:6129917	reverse	1	6129917	LB	LZ31-1	26	TGGATAGTAGTATACATACACATTTA	0		-10	Col-0	104269	pUBC-YFP-mod0	FALSE
LZ31-1-L_104269_pUBC-YFP-mod0	ku70	4	238	1	TRUE	1:24570843	forward	1	24570843	LB	LZ31-1	10	TACACCGCAA	0		-8	Col-0	104269	pUBC-YFP-mod0	FALSE
LZ31-1-L_104269_pUBC-YFP-mod0	ku70	6	185	0.833333	TRUE	1:10028988	forward	1	10028988	LB	LZ31-1	8	TGTGGTGT	0		-4	Col-0	104269	pUBC-YFP-mod0	FALSE
LZ31-1-L_104269_pUBC-YFP-mod0	ku70	5	241	1	TRUE	1:9935461	reverse	1	9935461	LB	LZ31-1	0		4	ATCC	-2	Col-0	104269	pUBC-YFP-mod0	FALSE
LZ31-1-L_104269_pUBC-YFP-mod0	ku70	18	281	0.944444	TRUE	1:572107	forward	1	572107	LB	LZ31-1	0		4	TTTA	-17	Col-0	104269	pUBC-YFP-mod0	FALSE
LZ31-1-L_104269_pUBC-YFP-mod0	ku70	4	344	1	TRUE	1:8144294	forward	1	8144294	LB	LZ31-1	0		1	T	-8	Col-0	104269	pUBC-YFP-mod0	FALSE
LZ31-1-L_104269_pUBC-YFP-mod0	ku70	3	311	1	TRUE	1:21093918	reverse	1	21093918	LB	LZ31-1	28	ATCTTTTTACAGCCGGAGATCTAAGCGT	0		-9	Col-0	104269	pUBC-YFP-mod0	FALSE
LZ31-1-L_104269_pUBC-YFP-mod0	ku70	3	365	1	TRUE	1:28139254	forward	1	28139254	LB	LZ31-1	0		3	TTG	-21	Col-0	104269	pUBC-YFP-mod0	FALSE
LZ31-1-L_104269_pUBC-YFP-mod0	ku70	10	444	1	TRUE	1:9425414	reverse	1	9425414	LB	LZ31-1	4	CAGT	0		-23	Col-0	104269	pUBC-YFP-mod0	FALSE
LZ31-1-L_104269_pUBC-YFP-mod0	ku70	9	252	0.888889	TRUE	1:6220938	reverse	1	6220938	LB	LZ31-1	0		0		-15	Col-0	104269	pUBC-YFP-mod0	FALSE
LZ31-1-L_104269_pUBC-YFP-mod0	ku70	4	266	1	TRUE	1:2283252	reverse	1	2283252	LB	LZ31-1	4	CTGT	0		-9	Col-0	104269	pUBC-YFP-mod0	FALSE
LZ31-1-L_104269_pUBC-YFP-mod0	ku70	3	289	1	TRUE	1:1240462	reverse	1	1240462	LB	LZ31-1	0		3	CAC	-11	Col-0	104269	pUBC-YFP-mod0	FALSE
LZ31-1-L_104269_pUBC-YFP-mod0	ku70	3	247	1	TRUE	1:29677652	reverse	1	29677652	LB	LZ31-1	26	AGCGTCAATGTGTTATTAAGTTGTCT	0		-5	Col-0	104269	pUBC-YFP-mod0	FALSE
LZ31-1-L_104269_pUBC-YFP-mod0	ku70	5	222	1	TRUE	1:898871	forward	1	898871	LB	LZ31-1	0		6	TTTGTT	-19	Col-0	104269	pUBC-YFP-mod0	FALSE
LZ31-1-L_104269_pUBC-YFP-mod0	ku70	6	421	0.833333	TRUE	1:22428013	reverse	1	22428013	LB	LZ31-1	0		2	TA	-5	Col-0	104269	pUBC-YFP-mod0	FALSE
LZ31-1-L_104269_pUBC-YFP-mod0	ku70	4	286	0.75	TRUE	1:21082250	forward	1	21082250	LB	LZ31-1	0		6	GTTTAC	-16	Col-0	104269	pUBC-YFP-mod0	FALSE
LZ31-1-L_104269_pUBC-YFP-mod0	ku70	3	319	1	TRUE	1:15053161	reverse	1	15053161	LB	LZ31-1	3	TAC	0		0	Col-0	104269	pUBC-YFP-mod0	FALSE
LZ31-1-L_104269_pUBC-YFP-mod0	ku70	6	148	1	TRUE	1:19582395	reverse	1	19582395	LB	LZ31-1	0		0		-13	Col-0	104269	pUBC-YFP-mod0	FALSE
LZ31-1-L_104269_pUBC-YFP-mod0	ku70	15	482	0.933333	TRUE	1:5145272	forward	1	5145272	LB	LZ31-1	19	AGACAAACCGGCCAGCTTT	0		-3	Col-0	104269	pUBC-YFP-mod0	FALSE
LZ31-1-L_104269_pUBC-YFP-mod0	ku70	11	318	0.909091	TRUE	1:5145273	reverse	1	5145273	LB	LZ31-1	0		1	C	-16	Col-0	104269	pUBC-YFP-mod0	FALSE
LZ31-1-L_104269_pUBC-YFP-mod0	ku70	6	235	1	TRUE	1:2289884	reverse	1	2289884	LB	LZ31-1	0		2	TT	-19	Col-0	104269	pUBC-YFP-mod0	FALSE
LZ31-1-L_104269_pUBC-YFP-mod0	ku70	9	497	0.888889	TRUE	1:10796423	reverse	1	10796423	LB	LZ31-1	10	GTTTGACCGT	0		0	Col-0	104269	pUBC-YFP-mod0	FALSE
LZ31-1-L_104269_pUBC-YFP-mod0	ku70	5	315	1	TRUE	1:11206880	reverse	1	11206880	LB	LZ31-1	0		2	CA	-12	Col-0	104269	pUBC-YFP-mod0	FALSE
LZ31-1-L_104269_pUBC-YFP-mod0	ku70	7	521	1	TRUE	1:10435626	reverse	1	10435626	LB	LZ31-1	0		4	TCCT	-1	Col-0	104269	pUBC-YFP-mod0	FALSE
LZ31-1-L_104269_pUBC-YFP-mod0	ku70	6	316	1	TRUE	1:22612086	forward	1	22612086	LB	LZ31-1	0		5	TTTAC	-16	Col-0	104269	pUBC-YFP-mod0	FALSE
LZ31-1-L_104269_pUBC-YFP-mod0	ku70	3	246	1	TRUE	1:20666776	forward	1	20666776	LB	LZ31-1	31	CTTCAACACAAATGGGCAGTGGTAAATTTCC	0		-26	Col-0	104269	pUBC-YFP-mod0	FALSE
LZ31-1-L_104269_pUBC-YFP-mod0	ku70	6	381	0.833333	TRUE	1:10810804	reverse	1	10810804	LB	LZ31-1	0		3	AAT	-8	Col-0	104269	pUBC-YFP-mod0	FALSE
LZ31-1-L_104269_pUBC-YFP-mod0	ku70	7	334	1	TRUE	1:19220328	reverse	1	19220328	LB	LZ31-1	3	TTT	0		-11	Col-0	104269	pUBC-YFP-mod0	FALSE
LZ31-1-L_104269_pUBC-YFP-mod0	ku70	5	252	1	TRUE	1:14149107	reverse	1	14149107	LB	LZ31-1	0		1	T	-8	Col-0	104269	pUBC-YFP-mod0	FALSE
LZ31-1-L_104269_pUBC-YFP-mod0	ku70	9	569	0.777778	TRUE	1:12581827	reverse	1	12581827	LB	LZ31-1	0		1	T	-20	Col-0	104269	pUBC-YFP-mod0	FALSE
LZ31-1-L_104269_pUBC-YFP-mod0	ku70	4	179	0.75	TRUE	1:28367513	reverse	1	28367513	LB	LZ31-1	0		5	TTTGT	-20	Col-0	104269	pUBC-YFP-mod0	FALSE
LZ31-1-L_104269_pUBC-YFP-mod0	ku70	3	237	1	TRUE	1:21697859	forward	1	21697859	LB	LZ31-1	21	GTTATCATTTCCACTTCCCAC	0		-4	Col-0	104269	pUBC-YFP-mod0	FALSE
LZ31-1-L_104269_pUBC-YFP-mod0	ku70	10	427	1	TRUE	1:22544400	forward	1	22544400	LB	LZ31-1	1	A	0		-23	Col-0	104269	pUBC-YFP-mod0	FALSE
LZ31-1-L_104269_pUBC-YFP-mod0	ku70	10	323	1	TRUE	1:24901730	forward	1	24901730	LB	LZ31-1	14	AGTGTTAAACATGA	0		-3	Col-0	104269	pUBC-YFP-mod0	FALSE
LZ31-1-L_104269_pUBC-YFP-mod0	ku70	3	202	1	TRUE	1:27715612	reverse	1	27715612	LB	LZ31-1	11	TGTGGACGTTT	0		-4	Col-0	104269	pUBC-YFP-mod0	FALSE
LZ31-1-L_104269_pUBC-YFP-mod0	ku70	7	329	1	TRUE	1:18226850	forward	1	18226850	LB	LZ31-1	20	GATTGACGTTGAGTTGAAGC	0		-9	Col-0	104269	pUBC-YFP-mod0	FALSE
LZ31-1-L_104269_pUBC-YFP-mod0	ku70	3	410	1	TRUE	1:2294464	forward	1	2294464	LB	LZ31-1	9	TTGTCTAAG	0		-8	Col-0	104269	pUBC-YFP-mod0	FALSE
LZ31-1-L_104269_pUBC-YFP-mod0	ku70	3	340	1	TRUE	1:22746766	reverse	1	22746766	LB	LZ31-1	13	GTTGTCCGCAATG	0		-25	Col-0	104269	pUBC-YFP-mod0	FALSE
LZ31-1-L_104269_pUBC-YFP-mod0	ku70	8	341	0.875	TRUE	1:7826303	reverse	1	7826303	LB	LZ31-1	7	AATTAAG	0		-12	Col-0	104269	pUBC-YFP-mod0	FALSE
LZ31-1-L_104269_pUBC-YFP-mod0	ku70	9	292	0.888889	TRUE	1:22088863	reverse	1	22088863	LB	LZ31-1	0		2	TA	-7	Col-0	104269	pUBC-YFP-mod0	FALSE
LZ31-1-L_104269_pUBC-YFP-mod0	ku70	4	167	1	TRUE	1:8958964	reverse	1	8958964	LB	LZ31-1	23	GCGCAGATTGTATTATCAGTTAG	0		-16	Col-0	104269	pUBC-YFP-mod0	FALSE
LZ31-1-L_104269_pUBC-YFP-mod0	ku70	5	253	0.8	TRUE	1:21968051	reverse	1	21968051	LB	LZ31-1	1	T	0		0	Col-0	104269	pUBC-YFP-mod0	FALSE
LZ31-1-L_104269_pUBC-YFP-mod0	ku70	3	238	1	TRUE	1:23072922	reverse	1	23072922	LB	LZ31-1	11	CTTAATGTACT	0		-25	Col-0	104269	pUBC-YFP-mod0	FALSE
LZ31-1-L_104269_pUBC-YFP-mod0	ku70	3	329	1	TRUE	1:29347981	reverse	1	29347981	LB	LZ31-1	0		4	CTGC	1	Col-0	104269	pUBC-YFP-mod0	FALSE
LZ31-1-L_104269_pUBC-YFP-mod0	ku70	3	542	1	TRUE	1:1992285	reverse	1	1992285	LB	LZ31-1	0		2	TA	-7	Col-0	104269	pUBC-YFP-mod0	FALSE
LZ31-1-L_104269_pUBC-YFP-mod0	ku70	6	226	0.833333	TRUE	1:9895097	forward	1	9895097	LB	LZ31-1	24	TTTGTTTATTACATCAAGATCAAG	0		-6	Col-0	104269	pUBC-YFP-mod0	FALSE
LZ31-1-L_104269_pUBC-YFP-mod0	ku70	4	189	1	TRUE	1:7680264	reverse	1	7680264	LB	LZ31-1	0		1	C	-16	Col-0	104269	pUBC-YFP-mod0	FALSE
LZ31-1-L_104269_pUBC-YFP-mod0	ku70	3	368	1	TRUE	1:6694797	forward	1	6694797	LB	LZ31-1	10	ATTCAGATAC	0		0	Col-0	104269	pUBC-YFP-mod0	FALSE
LZ31-1-L_104269_pUBC-YFP-mod0	ku70	4	372	1	TRUE	1:4846704	reverse	1	4846704	LB	LZ31-1	0		3	TTA	-17	Col-0	104269	pUBC-YFP-mod0	FALSE
LZ31-1-L_104269_pUBC-YFP-mod0	ku70	3	263	1	TRUE	1:28139654	reverse	1	28139654	LB	LZ31-1	0		1	T	-22	Col-0	104269	pUBC-YFP-mod0	FALSE
LZ31-1-L_104269_pUBC-YFP-mod0	ku70	3	321	1	TRUE	1:10957205	reverse	1	10957205	LB	LZ31-1	1	C	0		-20	Col-0	104269	pUBC-YFP-mod0	FALSE
LZ31-1-L_104269_pUBC-YFP-mod0	ku70	5	341	1	TRUE	1:19142721	reverse	1	19142721	LB	LZ31-1	2	GT	0		-6	Col-0	104269	pUBC-YFP-mod0	FALSE
LZ31-1-L_104269_pUBC-YFP-mod0	ku70	3	153	1	TRUE	1:11312441	reverse	1	11312441	LB	LZ31-1	0		4	ATAT	-6	Col-0	104269	pUBC-YFP-mod0	FALSE
LZ31-1-L_104269_pUBC-YFP-mod0	ku70	3	263	1	TRUE	1:23011641	reverse	1	23011641	LB	LZ31-1	0		3	ACA	-10	Col-0	104269	pUBC-YFP-mod0	FALSE
LZ31-1-L_104269_pUBC-YFP-mod0	ku70	4	295	0.75	TRUE	1:20870629	forward	1	20870629	LB	LZ31-1	0		4	TTGT	-20	Col-0	104269	pUBC-YFP-mod0	FALSE
LZ31-1-L_104269_pUBC-YFP-mod0	ku70	4	195	1	TRUE	1:24570856	reverse	1	24570856	LB	LZ31-1	23	TAGTTTAAACAAATTGACGATTA	0		-1	Col-0	104269	pUBC-YFP-mod0	FALSE
LZ31-1-L_104269_pUBC-YFP-mod0	ku70	3	199	1	TRUE	1:5819489	forward	1	5819489	LB	LZ31-1	2	AG	0		0	Col-0	104269	pUBC-YFP-mod0	FALSE
LZ31-1-L_104269_pUBC-YFP-mod0	ku70	5	428	1	TRUE	1:7488768	reverse	1	7488768	LB	LZ31-1	0		3	AAT	-8	Col-0	104269	pUBC-YFP-mod0	FALSE
LZ31-1-L_104269_pUBC-YFP-mod0	ku70	3	185	1	TRUE	2:277600	forward	2	277600	LB	LZ31-1	0		4	TCTA	-33	Col-0	104269	pUBC-YFP-mod0	FALSE
LZ31-1-L_104269_pUBC-YFP-mod0	ku70	3	201	1	TRUE	2:345232	reverse	2	345232	LB	LZ31-1	0		1	T	-34	Col-0	104269	pUBC-YFP-mod0	FALSE
LZ31-1-L_104269_pUBC-YFP-mod0	ku70	4	254	1	TRUE	2:592176	reverse	2	592176	LB	LZ31-1	13	TCGCGTAATTTAT	0		-31	Col-0	104269	pUBC-YFP-mod0	FALSE
LZ31-1-L_104269_pUBC-YFP-mod0	ku70	5	340	1	TRUE	2:752206	forward	2	752206	LB	LZ31-1	0		2	TA	-65	Col-0	104269	pUBC-YFP-mod0	FALSE
LZ31-1-L_104269_pUBC-YFP-mod0	ku70	4	253	0.75	TRUE	2:4825564	reverse	2	4825564	LB	LZ31-1	20	ATAATTCAATTCGGCGTTAA	0		0	Col-0	104269	pUBC-YFP-mod0	FALSE
LZ31-1-L_104269_pUBC-YFP-mod0	ku70	6	351	0.833333	TRUE	2:4962211	reverse	2	4962211	LB	LZ31-1	0		2	GC	-30	Col-0	104269	pUBC-YFP-mod0	FALSE
LZ31-1-L_104269_pUBC-YFP-mod0	ku70	4	253	1	TRUE	2:8243179	forward	2	8243179	LB	LZ31-1	24	ACACCGCGCGCGATAATTTAATAA	0		-37	Col-0	104269	pUBC-YFP-mod0	FALSE
LZ31-1-L_104269_pUBC-YFP-mod0	ku70	6	245	1	TRUE	2:8471606	reverse	2	8471606	LB	LZ31-1	0		3	CTA	-33	Col-0	104269	pUBC-YFP-mod0	FALSE
LZ31-1-L_104269_pUBC-YFP-mod0	ku70	4	302	0.75	TRUE	2:8538375	forward	2	8538375	LB	LZ31-1	0		1	A	-26	Col-0	104269	pUBC-YFP-mod0	FALSE
LZ31-1-L_104269_pUBC-YFP-mod0	ku70	5	462	0.8	TRUE	2:9242877	forward	2	9242877	LB	LZ31-1	0		1	C	-35	Col-0	104269	pUBC-YFP-mod0	FALSE
LZ31-1-L_104269_pUBC-YFP-mod0	ku70	11	489	0.909091	TRUE	2:9651691	reverse	2	9651691	LB	LZ31-1	3	ACG	0		-32	Col-0	104269	pUBC-YFP-mod0	FALSE
LZ31-1-L_104269_pUBC-YFP-mod0	ku70	10	262	0.8	TRUE	2:9823985	forward	2	9823985	LB	LZ31-1	6	TTCAGT	0		-41	Col-0	104269	pUBC-YFP-mod0	FALSE
LZ31-1-L_104269_pUBC-YFP-mod0	ku70	13	362	0.923077	TRUE	2:10030992	forward	2	10030992	LB	LZ31-1	11	GTCGTCTTAAA	0		-43	Col-0	104269	pUBC-YFP-mod0	FALSE
LZ31-1-L_104269_pUBC-YFP-mod0	ku70	3	533	1	TRUE	2:10605985	reverse	2	10605985	LB	LZ31-1	0		3	ATT	-23	Col-0	104269	pUBC-YFP-mod0	FALSE
LZ31-1-L_104269_pUBC-YFP-mod0	ku70	4	385	1	TRUE	2:12134610	forward	2	12134610	LB	LZ31-1	0		0		-25	Col-0	104269	pUBC-YFP-mod0	FALSE
LZ31-1-L_104269_pUBC-YFP-mod0	ku70	13	295	0.846154	TRUE	2:12291661	forward	2	12291661	LB	LZ31-1	0		3	TAT	-44	Col-0	104269	pUBC-YFP-mod0	FALSE
LZ31-1-L_104269_pUBC-YFP-mod0	ku70	8	312	0.875	TRUE	2:13463364	reverse	2	13463364	LB	LZ31-1	0		3	AAT	-24	Col-0	104269	pUBC-YFP-mod0	FALSE
LZ31-1-L_104269_pUBC-YFP-mod0	ku70	8	422	0.875	TRUE	2:14329073	reverse	2	14329073	LB	LZ31-1	20	GTTAATTCAGTACATGACAT	0		-35	Col-0	104269	pUBC-YFP-mod0	FALSE
LZ31-1-L_104269_pUBC-YFP-mod0	ku70	4	202	1	TRUE	2:14465097	reverse	2	14465097	LB	LZ31-1	0		3	ATT	-23	Col-0	104269	pUBC-YFP-mod0	FALSE
LZ31-1-L_104269_pUBC-YFP-mod0	ku70	3	335	1	TRUE	2:16476531	forward	2	16476531	LB	LZ31-1	0		2	CG	-29	Col-0	104269	pUBC-YFP-mod0	FALSE
LZ31-1-L_104269_pUBC-YFP-mod0	ku70	4	328	0.75	TRUE	2:16820069	reverse	2	16820069	LB	LZ31-1	0		3	TTT	-22	Col-0	104269	pUBC-YFP-mod0	FALSE
LZ31-1-L_104269_pUBC-YFP-mod0	ku70	3	242	1	TRUE	2:17354505	forward	2	17354505	LB	LZ31-1	30	GCTGTCTTTGGTCCTGAAGTTCACCTTGTA	0		-42	Col-0	104269	pUBC-YFP-mod0	FALSE
LZ31-1-L_104269_pUBC-YFP-mod0	ku70	8	361	1	TRUE	2:17668076	forward	2	17668076	LB	LZ31-1	0		0		-49	Col-0	104269	pUBC-YFP-mod0	FALSE
LZ31-1-L_104269_pUBC-YFP-mod0	ku70	4	324	1	TRUE	2:17709963	reverse	2	17709963	LB	LZ31-1	0		4	CAAT	-24	Col-0	104269	pUBC-YFP-mod0	FALSE
LZ31-1-L_104269_pUBC-YFP-mod0	ku70	30	438	0.933333	TRUE	2:18612900	reverse	2	18612900	LB	LZ31-1	2	AT	0		-24	Col-0	104269	pUBC-YFP-mod0	FALSE
LZ31-1-L_104269_pUBC-YFP-mod0	ku70	16	566	0.9375	TRUE	2:19469652	reverse	2	19469652	LB	LZ31-1	0		3	ATT	-23	Col-0	104269	pUBC-YFP-mod0	FALSE
LZ31-1-L_104269_pUBC-YFP-mod0	ku70	20	366	0.95	TRUE	2:1116493	reverse	2	1116493	LB	LZ31-1	0		4	CACA	-10	Col-0	104269	pUBC-YFP-mod0	FALSE
LZ31-1-L_104269_pUBC-YFP-mod0	ku70	4	241	1	TRUE	2:17364295	reverse	2	17364295	LB	LZ31-1	0		4	TTGT	-20	Col-0	104269	pUBC-YFP-mod0	FALSE
LZ31-1-L_104269_pUBC-YFP-mod0	ku70	6	292	1	TRUE	2:16642340	forward	2	16642340	LB	LZ31-1	0		2	TG	0	Col-0	104269	pUBC-YFP-mod0	FALSE
LZ31-1-L_104269_pUBC-YFP-mod0	ku70	3	212	1	TRUE	2:13338837	reverse	2	13338837	LB	LZ31-1	0		2	TC	-3	Col-0	104269	pUBC-YFP-mod0	FALSE
LZ31-1-L_104269_pUBC-YFP-mod0	ku70	83	416	0.952941	TRUE	2:15830343	reverse	2	15830343	LB	LZ31-1	0		2	CC	-2	Col-0	104269	pUBC-YFP-mod0	FALSE
LZ31-1-L_104269_pUBC-YFP-mod0	ku70	18	387	0.944444	TRUE	2:13627744	reverse	2	13627744	LB	LZ31-1	0		0		-11	Col-0	104269	pUBC-YFP-mod0	FALSE
LZ31-1-L_104269_pUBC-YFP-mod0	ku70	5	481	1	TRUE	2:15910872	forward	2	15910872	LB	LZ31-1	8	TTGTTTTT	0		-8	Col-0	104269	pUBC-YFP-mod0	FALSE
LZ31-1-L_104269_pUBC-YFP-mod0	ku70	27	449	0.962963	TRUE	2:827287	reverse	2	827287	LB	LZ31-1	22	TTAATTCAATTCGGCGTTAATT	0		0	Col-0	104269	pUBC-YFP-mod0	FALSE
LZ31-1-L_104269_pUBC-YFP-mod0	ku70	4	256	1	TRUE	2:1188593	reverse	2	1188593	LB	LZ31-1	15	TAATAAACGTCCGCA	0		-13	Col-0	104269	pUBC-YFP-mod0	FALSE
LZ31-1-L_104269_pUBC-YFP-mod0	ku70	4	216	1	TRUE	2:11178068	forward	2	11178068	LB	LZ31-1	2	TT	0		-6	Col-0	104269	pUBC-YFP-mod0	FALSE
LZ31-1-L_104269_pUBC-YFP-mod0	ku70	3	226	1	TRUE	2:11478670	forward	2	11478670	LB	LZ31-1	12	TAGAAAACGTCC	0		-3	Col-0	104269	pUBC-YFP-mod0	FALSE
LZ31-1-L_104269_pUBC-YFP-mod0	ku70	43	387	0.860465	TRUE	2:9047419	reverse	2	9047419	LB	LZ31-1	41	CGATTTAGTAACATAGTAACATAGATGATCATCTATGTTAC	0		-41	Col-0	104269	pUBC-YFP-mod0	FALSE
LZ31-1-L_104269_pUBC-YFP-mod0	ku70	22	249	0.866667	TRUE	2:19279205	forward	2	19279205	LB	LZ31-1	0		1	G	0	Col-0	104269	pUBC-YFP-mod0	FALSE
LZ31-1-L_104269_pUBC-YFP-mod0	ku70	11	339	0.909091	TRUE	2:16429249	forward	2	16429249	LB	LZ31-1	0		2	CA	-15	Col-0	104269	pUBC-YFP-mod0	FALSE
LZ31-1-L_104269_pUBC-YFP-mod0	ku70	4	234	0.75	TRUE	2:15321705	reverse	2	15321705	LB	LZ31-1	0		4	CACC	-13	Col-0	104269	pUBC-YFP-mod0	FALSE
LZ31-1-L_104269_pUBC-YFP-mod0	ku70	5	364	0.8	TRUE	2:18950377	reverse	2	18950377	LB	LZ31-1	11	GTGTTATTAAT	0		-24	Col-0	104269	pUBC-YFP-mod0	FALSE
LZ31-1-L_104269_pUBC-YFP-mod0	ku70	6	287	0.833333	TRUE	2:15589508	forward	2	15589508	LB	LZ31-1	0		2	CA	-10	Col-0	104269	pUBC-YFP-mod0	FALSE
LZ31-1-L_104269_pUBC-YFP-mod0	ku70	3	172	1	TRUE	2:9526037	reverse	2	9526037	LB	LZ31-1	0		3	CTG	0	Col-0	104269	pUBC-YFP-mod0	FALSE
LZ31-1-L_104269_pUBC-YFP-mod0	ku70	6	391	1	TRUE	2:14477377	forward	2	14477377	LB	LZ31-1	0		1	T	-20	Col-0	104269	pUBC-YFP-mod0	FALSE
LZ31-1-L_104269_pUBC-YFP-mod0	ku70	4	166	0.9	TRUE	2:16252410	reverse	2	16252410	LB	LZ31-1	0		6	TATCCT	-1	Col-0	104269	pUBC-YFP-mod0	FALSE
LZ31-1-L_104269_pUBC-YFP-mod0	ku70	4	304	1	TRUE	2:560681	reverse	2	560681	LB	LZ31-1	0		5	TTTGT	-20	Col-0	104269	pUBC-YFP-mod0	FALSE
LZ31-1-L_104269_pUBC-YFP-mod0	ku70	9	284	0.888889	TRUE	2:17771284	reverse	2	17771284	LB	LZ31-1	0		1	T	-8	Col-0	104269	pUBC-YFP-mod0	FALSE
LZ31-1-L_104269_pUBC-YFP-mod0	ku70	5	358	1	TRUE	2:15028841	reverse	2	15028841	LB	LZ31-1	0		0		0	Col-0	104269	pUBC-YFP-mod0	FALSE
LZ31-1-L_104269_pUBC-YFP-mod0	ku70	7	257	1	TRUE	2:6765475	reverse	2	6765475	LB	LZ31-1	0		4	TACA	-15	Col-0	104269	pUBC-YFP-mod0	FALSE
LZ31-1-L_104269_pUBC-YFP-mod0	ku70	3	231	1	TRUE	2:10677079	forward	2	10677079	LB	LZ31-1	0		2	CA	-15	Col-0	104269	pUBC-YFP-mod0	FALSE
LZ31-1-L_104269_pUBC-YFP-mod0	ku70	8	337	1	TRUE	2:14476641	reverse	2	14476641	LB	LZ31-1	0		4	TTTA	-17	Col-0	104269	pUBC-YFP-mod0	FALSE
LZ31-1-L_104269_pUBC-YFP-mod0	ku70	8	296	1	TRUE	2:19136471	forward	2	19136471	LB	LZ31-1	23	AGCTACTAATACTTTCTACACCA	0		-5	Col-0	104269	pUBC-YFP-mod0	FALSE
LZ31-1-L_104269_pUBC-YFP-mod0	ku70	5	280	1	TRUE	2:9994053	forward	2	9994053	LB	LZ31-1	0		1	T	-19	Col-0	104269	pUBC-YFP-mod0	FALSE
LZ31-1-L_104269_pUBC-YFP-mod0	ku70	5	198	1	TRUE	2:11812741	forward	2	11812741	LB	LZ31-1	0		4	TTGT	-20	Col-0	104269	pUBC-YFP-mod0	FALSE
LZ31-1-L_104269_pUBC-YFP-mod0	ku70	7	357	1	TRUE	2:10953867	reverse	2	10953867	LB	LZ31-1	11	AACGTCCGCAA	0		-25	Col-0	104269	pUBC-YFP-mod0	FALSE
LZ31-1-L_104269_pUBC-YFP-mod0	ku70	5	530	1	TRUE	2:16565364	forward	2	16565364	LB	LZ31-1	35	CGTACATTAAGTTGTTTAATTCAGTACATTAAAAA	0		-26	Col-0	104269	pUBC-YFP-mod0	FALSE
LZ31-1-L_104269_pUBC-YFP-mod0	ku70	21	338	0.761905	TRUE	2:13146118	forward	2	13146118	LB	LZ31-1	6	ATTGCG	0		-14	Col-0	104269	pUBC-YFP-mod0	FALSE
LZ31-1-L_104269_pUBC-YFP-mod0	ku70	11	386	0.909091	TRUE	2:19690447	reverse	2	19690447	LB	LZ31-1	0		9	CATCACAAT	-8	Col-0	104269	pUBC-YFP-mod0	FALSE
LZ31-1-L_104269_pUBC-YFP-mod0	ku70	3	247	1	TRUE	2:18528551	forward	2	18528551	LB	LZ31-1	11	TTACACTACTT	0		0	Col-0	104269	pUBC-YFP-mod0	FALSE
LZ31-1-L_104269_pUBC-YFP-mod0	ku70	5	321	0.8	TRUE	2:14124658	reverse	2	14124658	LB	LZ31-1	0		2	AC	-14	Col-0	104269	pUBC-YFP-mod0	FALSE
LZ31-1-L_104269_pUBC-YFP-mod0	ku70	3	154	1	TRUE	2:12519233	reverse	2	12519233	LB	LZ31-1	17	TTTGTGATCAATTAAAT	0		-22	Col-0	104269	pUBC-YFP-mod0	FALSE
LZ31-1-L_104269_pUBC-YFP-mod0	ku70	4	295	1	TRUE	2:16819360	reverse	2	16819360	LB	LZ31-1	7	CATTTCA	0		-20	Col-0	104269	pUBC-YFP-mod0	FALSE
LZ31-1-L_104269_pUBC-YFP-mod0	ku70	9	351	1	TRUE	2:14818629	reverse	2	14818629	LB	LZ31-1	0		1	C	-16	Col-0	104269	pUBC-YFP-mod0	FALSE
LZ31-1-L_104269_pUBC-YFP-mod0	ku70	4	239	1	TRUE	2:1052051	forward	2	1052051	LB	LZ31-1	0		3	CTG	0	Col-0	104269	pUBC-YFP-mod0	FALSE
LZ31-1-L_104269_pUBC-YFP-mod0	ku70	5	458	1	TRUE	2:14650025	reverse	2	14650025	LB	LZ31-1	0		2	CT	-1	Col-0	104269	pUBC-YFP-mod0	FALSE
LZ31-1-L_104269_pUBC-YFP-mod0	ku70	3	523	1	TRUE	2:13988144	forward	2	13988144	LB	LZ31-1	0		4	CACC	-13	Col-0	104269	pUBC-YFP-mod0	FALSE
LZ31-1-L_104269_pUBC-YFP-mod0	ku70	3	220	1	TRUE	2:18341834	forward	2	18341834	LB	LZ31-1	4	TTAG	0		-11	Col-0	104269	pUBC-YFP-mod0	FALSE
LZ31-1-L_104269_pUBC-YFP-mod0	ku70	3	161	1	TRUE	2:15626497	forward	2	15626497	LB	LZ31-1	19	AAGTTGTCTAAGTTCTACA	0		-24	Col-0	104269	pUBC-YFP-mod0	FALSE
LZ31-1-L_104269_pUBC-YFP-mod0	ku70	3	323	1	TRUE	2:16381471	reverse	2	16381471	LB	LZ31-1	15	TAGTTTAAACAGAGA	0		0	Col-0	104269	pUBC-YFP-mod0	FALSE
LZ31-1-L_104269_pUBC-YFP-mod0	ku70	4	227	0.75	TRUE	2:10609641	forward	2	10609641	LB	LZ31-1	3	GAA	0		-9	Col-0	104269	pUBC-YFP-mod0	FALSE
LZ31-1-L_104269_pUBC-YFP-mod0	ku70	3	241	1	TRUE	2:9318542	reverse	2	9318542	LB	LZ31-1	0		2	GC	1	Col-0	104269	pUBC-YFP-mod0	FALSE
LZ31-1-L_104269_pUBC-YFP-mod0	ku70	4	250	1	TRUE	2:7325889	reverse	2	7325889	LB	LZ31-1	11	GCAATTATATA	0		5	Col-0	104269	pUBC-YFP-mod0	FALSE
LZ31-1-L_104269_pUBC-YFP-mod0	ku70	4	400	0.75	TRUE	2:13464248	reverse	2	13464248	LB	LZ31-1	0		3	TTA	-17	Col-0	104269	pUBC-YFP-mod0	FALSE
LZ31-1-L_104269_pUBC-YFP-mod0	ku70	3	296	0.75	TRUE	2:11825006	forward	2	11825006	LB	LZ31-1	2	GA	0		0	Col-0	104269	pUBC-YFP-mod0	FALSE
LZ31-1-L_104269_pUBC-YFP-mod0	ku70	3	193	1	TRUE	2:18528633	reverse	2	18528633	LB	LZ31-1	13	ATATGATTAAGTT	0		-20	Col-0	104269	pUBC-YFP-mod0	FALSE
LZ31-1-L_104269_pUBC-YFP-mod0	ku70	8	269	1	TRUE	2:5514185	reverse	2	5514185	LB	LZ31-1	0		2	GC	1	Col-0	104269	pUBC-YFP-mod0	FALSE
LZ31-1-L_104269_pUBC-YFP-mod0	ku70	5	303	1	TRUE	2:1168622	reverse	2	1168622	LB	LZ31-1	1	A	0		-4	Col-0	104269	pUBC-YFP-mod0	FALSE
LZ31-1-L_104269_pUBC-YFP-mod0	ku70	6	200	1	TRUE	2:17838365	forward	2	17838365	LB	LZ31-1	0		4	ATAT	-4	Col-0	104269	pUBC-YFP-mod0	FALSE
LZ31-1-L_104269_pUBC-YFP-mod0	ku70	3	283	1	TRUE	2:15095123	reverse	2	15095123	LB	LZ31-1	0		6	CAATAT	-6	Col-0	104269	pUBC-YFP-mod0	FALSE
LZ31-1-L_104269_pUBC-YFP-mod0	ku70	3	259	1	TRUE	2:9506936	reverse	2	9506936	LB	LZ31-1	0		3	ACA	-10	Col-0	104269	pUBC-YFP-mod0	FALSE
LZ31-1-L_104269_pUBC-YFP-mod0	ku70	4	392	1	TRUE	2:14414297	reverse	2	14414297	LB	LZ31-1	0		3	CCA	-12	Col-0	104269	pUBC-YFP-mod0	FALSE
LZ31-1-L_104269_pUBC-YFP-mod0	ku70	6	385	1	TRUE	3:218817	forward	3	218817	LB	LZ31-1	14	CCAATAAAGTGCAG	0		-30	Col-0	104269	pUBC-YFP-mod0	FALSE
LZ31-1-L_104269_pUBC-YFP-mod0	ku70	3	289	1	TRUE	3:1629086	reverse	3	1629086	LB	LZ31-1	3	GTT	0		-25	Col-0	104269	pUBC-YFP-mod0	FALSE
LZ31-1-L_104269_pUBC-YFP-mod0	ku70	6	259	1	TRUE	3:1669864	forward	3	1669864	LB	LZ31-1	0		3	ATT	-66	Col-0	104269	pUBC-YFP-mod0	FALSE
LZ31-1-L_104269_pUBC-YFP-mod0	ku70	9	310	0.777778	TRUE	3:1756530	reverse	3	1756530	LB	LZ31-1	22	CAATTTGTTTACACCACAATAA	0		-44	Col-0	104269	pUBC-YFP-mod0	FALSE
LZ31-1-L_104269_pUBC-YFP-mod0	ku70	4	144	1	TRUE	3:2001716	forward	3	2001716	LB	LZ31-1	15	TGTACTATCAGTGTT	0		-32	Col-0	104269	pUBC-YFP-mod0	FALSE
LZ31-1-L_104269_pUBC-YFP-mod0	ku70	8	357	1	TRUE	3:3558488	reverse	3	3558488	LB	LZ31-1	0		2	TG	-48	Col-0	104269	pUBC-YFP-mod0	FALSE
LZ31-1-L_104269_pUBC-YFP-mod0	ku70	3	238	1	TRUE	3:3669542	reverse	3	3669542	LB	LZ31-1	2	TT	0		-32	Col-0	104269	pUBC-YFP-mod0	FALSE
LZ31-1-L_104269_pUBC-YFP-mod0	ku70	20	586	1	TRUE	3:4336295	forward	3	4336295	LB	LZ31-1	0		2	TG	-37	Col-0	104269	pUBC-YFP-mod0	FALSE
LZ31-1-L_104269_pUBC-YFP-mod0	ku70	15	450	0.947368	TRUE	3:5616399	reverse	3	5616399	LB	LZ31-1	0		4	TATT	-43	Col-0	104269	pUBC-YFP-mod0	FALSE
LZ31-1-L_104269_pUBC-YFP-mod0	ku70	3	215	1	TRUE	3:6387789	reverse	3	6387789	LB	LZ31-1	0		3	GTC	-27	Col-0	104269	pUBC-YFP-mod0	FALSE
LZ31-1-L_104269_pUBC-YFP-mod0	ku70	3	244	1	TRUE	3:7351336	forward	3	7351336	LB	LZ31-1	0		4	CTAA	-32	Col-0	104269	pUBC-YFP-mod0	FALSE
LZ31-1-L_104269_pUBC-YFP-mod0	ku70	8	410	0.75	TRUE	3:7626534	forward	3	7626534	LB	LZ31-1	7	CGTGTTC	0		-38	Col-0	104269	pUBC-YFP-mod0	FALSE
LZ31-1-L_104269_pUBC-YFP-mod0	ku70	20	308	0.9	TRUE	3:8083619	forward	3	8083619	LB	LZ31-1	9	AACGTCCGC	0		-17	Col-0	104269	pUBC-YFP-mod0	FALSE
LZ31-1-L_104269_pUBC-YFP-mod0	ku70	5	430	0.8	TRUE	3:8868494	forward	3	8868494	LB	LZ31-1	32	TTCCCGGCATGCAAGCTGATAATTCAATTCGC	0		-58	Col-0	104269	pUBC-YFP-mod0	FALSE
LZ31-1-L_104269_pUBC-YFP-mod0	ku70	23	466	0.782609	TRUE	3:10439927	reverse	3	10439927	LB	LZ31-1	0		3	ATT	-23	Col-0	104269	pUBC-YFP-mod0	FALSE
LZ31-1-L_104269_pUBC-YFP-mod0	ku70	15	330	0.933333	TRUE	3:11364743	reverse	3	11364743	LB	LZ31-1	13	TAGTAAACGTCCG	0		-43	Col-0	104269	pUBC-YFP-mod0	FALSE
LZ31-1-L_104269_pUBC-YFP-mod0	ku70	3	296	0.75	TRUE	3:16054431	reverse	3	16054431	LB	LZ31-1	10	ACGTCCACAA	0		-32	Col-0	104269	pUBC-YFP-mod0	FALSE
LZ31-1-L_104269_pUBC-YFP-mod0	ku70	23	319	0.923077	TRUE	3:16734869	reverse	3	16734869	LB	LZ31-1	1	G	0		0	Col-0	104269	pUBC-YFP-mod0	FALSE
LZ31-1-L_104269_pUBC-YFP-mod0	ku70	3	323	1	TRUE	3:17612215	reverse	3	17612215	LB	LZ31-1	1	A	0		-29	Col-0	104269	pUBC-YFP-mod0	FALSE
LZ31-1-L_104269_pUBC-YFP-mod0	ku70	9	256	0.888889	TRUE	3:18022627	forward	3	18022627	LB	LZ31-1	0		1	A	-41	Col-0	104269	pUBC-YFP-mod0	FALSE
LZ31-1-L_104269_pUBC-YFP-mod0	ku70	7	533	0.857143	TRUE	3:18027722	reverse	3	18027722	LB	LZ31-1	0		4	CGTC	-27	Col-0	104269	pUBC-YFP-mod0	FALSE
LZ31-1-L_104269_pUBC-YFP-mod0	ku70	8	322	1	TRUE	3:18324694	forward	3	18324694	LB	LZ31-1	0		2	CT	-34	Col-0	104269	pUBC-YFP-mod0	FALSE
LZ31-1-L_104269_pUBC-YFP-mod0	ku70	8	290	1	TRUE	3:18972953	reverse	3	18972953	LB	LZ31-1	7	TAAGAAC	0		-28	Col-0	104269	pUBC-YFP-mod0	FALSE
LZ31-1-L_104269_pUBC-YFP-mod0	ku70	4	186	1	TRUE	3:19076351	forward	3	19076351	LB	LZ31-1	19	AATCACACTTTTTTCATCA	0		-35	Col-0	104269	pUBC-YFP-mod0	FALSE
LZ31-1-L_104269_pUBC-YFP-mod0	ku70	3	179	1	TRUE	3:19121008	forward	3	19121008	LB	LZ31-1	0		2	TT	-66	Col-0	104269	pUBC-YFP-mod0	FALSE
LZ31-1-L_104269_pUBC-YFP-mod0	ku70	3	289	1	TRUE	3:19310670	reverse	3	19310670	LB	LZ31-1	0		3	ATG	-50	Col-0	104269	pUBC-YFP-mod0	FALSE
LZ31-1-L_104269_pUBC-YFP-mod0	ku70	4	555	0.75	TRUE	3:20037250	forward	3	20037250	LB	LZ31-1	0		5	TCAAT	-24	Col-0	104269	pUBC-YFP-mod0	FALSE
LZ31-1-L_104269_pUBC-YFP-mod0	ku70	11	275	1	TRUE	3:20293665	reverse	3	20293665	LB	LZ31-1	0		7	AATGTGT	-47	Col-0	104269	pUBC-YFP-mod0	FALSE
LZ31-1-L_104269_pUBC-YFP-mod0	ku70	8	374	0.875	TRUE	3:20573934	forward	3	20573934	LB	LZ31-1	0		7	ACTTGTT	-19	Col-0	104269	pUBC-YFP-mod0	FALSE
LZ31-1-L_104269_pUBC-YFP-mod0	ku70	10	281	1	TRUE	3:21009291	forward	3	21009291	LB	LZ31-1	0		3	AAT	-51	Col-0	104269	pUBC-YFP-mod0	FALSE
LZ31-1-L_104269_pUBC-YFP-mod0	ku70	4	435	1	TRUE	3:21269181	reverse	3	21269181	LB	LZ31-1	1	C	0		-25	Col-0	104269	pUBC-YFP-mod0	FALSE
LZ31-1-L_104269_pUBC-YFP-mod0	ku70	4	263	1	TRUE	3:21397769	forward	3	21397769	LB	LZ31-1	0		3	AGC	-30	Col-0	104269	pUBC-YFP-mod0	FALSE
LZ31-1-L_104269_pUBC-YFP-mod0	ku70	6	310	1	TRUE	3:21980644	reverse	3	21980644	LB	LZ31-1	0		2	GT	-49	Col-0	104269	pUBC-YFP-mod0	FALSE
LZ31-1-L_104269_pUBC-YFP-mod0	ku70	15	408	1	TRUE	3:22797090	reverse	3	22797090	LB	LZ31-1	1	C	0		-50	Col-0	104269	pUBC-YFP-mod0	FALSE
LZ31-1-L_104269_pUBC-YFP-mod0	ku70	14	231	1	TRUE	3:19740711	reverse	3	19740711	LB	LZ31-1	11	TTGTTAACAAA	0		-8	Col-0	104269	pUBC-YFP-mod0	FALSE
LZ31-1-L_104269_pUBC-YFP-mod0	ku70	34	506	0.911765	TRUE	3:20244324	forward	3	20244324	LB	LZ31-1	0		3	CAA	-9	Col-0	104269	pUBC-YFP-mod0	FALSE
LZ31-1-L_104269_pUBC-YFP-mod0	ku70	32	327	0.928571	TRUE	3:1233180	reverse	3	1233180	LB	LZ31-1	0		0		-10	Col-0	104269	pUBC-YFP-mod0	FALSE
LZ31-1-L_104269_pUBC-YFP-mod0	ku70	45	501	0.844444	TRUE	3:8020488	forward	3	8020488	LB	LZ31-1	0		2	AT	-8	Col-0	104269	pUBC-YFP-mod0	FALSE
LZ31-1-L_104269_pUBC-YFP-mod0	ku70	12	317	1	TRUE	3:18272554	reverse	3	18272554	LB	LZ31-1	0		4	TTGT	-20	Col-0	104269	pUBC-YFP-mod0	FALSE
LZ31-1-L_104269_pUBC-YFP-mod0	ku70	26	330	0.846154	TRUE	3:17387798	reverse	3	17387798	LB	LZ31-1	25	GCAATGTGTTATTAAGTTGTCTAAG	0		-13	Col-0	104269	pUBC-YFP-mod0	FALSE
LZ31-1-L_104269_pUBC-YFP-mod0	ku70	17	409	0.882353	TRUE	3:17583524	reverse	3	17583524	LB	LZ31-1	0		0		-10	Col-0	104269	pUBC-YFP-mod0	FALSE
LZ31-1-L_104269_pUBC-YFP-mod0	ku70	24	360	0.875	TRUE	3:10439901	forward	3	10439901	LB	LZ31-1	4	AGTG	0		-23	Col-0	104269	pUBC-YFP-mod0	FALSE
LZ31-1-L_104269_pUBC-YFP-mod0	ku70	7	263	0.857143	TRUE	3:21292658	reverse	3	21292658	LB	LZ31-1	0		4	TATC	-3	Col-0	104269	pUBC-YFP-mod0	FALSE
LZ31-1-L_104269_pUBC-YFP-mod0	ku70	6	500	0.833333	TRUE	3:4509196	forward	3	4509196	LB	LZ31-1	0		2	TT	-19	Col-0	104269	pUBC-YFP-mod0	FALSE
LZ31-1-L_104269_pUBC-YFP-mod0	ku70	12	394	0.769231	TRUE	3:20585699	forward	3	20585699	LB	LZ31-1	0		3	CCT	-1	Col-0	104269	pUBC-YFP-mod0	FALSE
LZ31-1-L_104269_pUBC-YFP-mod0	ku70	6	212	1	TRUE	3:9255798	reverse	3	9255798	LB	LZ31-1	0		1	A	-7	Col-0	104269	pUBC-YFP-mod0	FALSE
LZ31-1-L_104269_pUBC-YFP-mod0	ku70	4	491	1	TRUE	3:18007758	reverse	3	18007758	LB	LZ31-1	0		3	ATC	-3	Col-0	104269	pUBC-YFP-mod0	FALSE
LZ31-1-L_104269_pUBC-YFP-mod0	ku70	25	353	0.84	TRUE	3:16163245	reverse	3	16163245	LB	LZ31-1	0		1	A	-9	Col-0	104269	pUBC-YFP-mod0	FALSE
LZ31-1-L_104269_pUBC-YFP-mod0	ku70	9	339	0.9	TRUE	3:19393088	forward	3	19393088	LB	LZ31-1	0		0		-1	Col-0	104269	pUBC-YFP-mod0	FALSE
LZ31-1-L_104269_pUBC-YFP-mod0	ku70	4	240	0.75	TRUE	3:6649719	reverse	3	6649719	LB	LZ31-1	0		3	ATC	-3	Col-0	104269	pUBC-YFP-mod0	FALSE
LZ31-1-L_104269_pUBC-YFP-mod0	ku70	4	216	1	TRUE	3:9969799	reverse	3	9969799	LB	LZ31-1	13	CTCAAGCTAAAAG	0		-19	Col-0	104269	pUBC-YFP-mod0	FALSE
LZ31-1-L_104269_pUBC-YFP-mod0	ku70	15	333	1	TRUE	3:12436087	forward	3	12436087	LB	LZ31-1	7	GTACAGC	0		-24	Col-0	104269	pUBC-YFP-mod0	FALSE
LZ31-1-L_104269_pUBC-YFP-mod0	ku70	7	458	0.857143	TRUE	3:18166968	forward	3	18166968	LB	LZ31-1	3	AAT	0		0	Col-0	104269	pUBC-YFP-mod0	FALSE
LZ31-1-L_104269_pUBC-YFP-mod0	ku70	23	574	0.9	TRUE	3:293576	forward	3	293576	LB	LZ31-1	0		4	CCTG	0	Col-0	104269	pUBC-YFP-mod0	FALSE
LZ31-1-L_104269_pUBC-YFP-mod0	ku70	20	457	0.95	TRUE	3:19734183	forward	3	19734183	LB	LZ31-1	9	ATGTGTTAT	0		0	Col-0	104269	pUBC-YFP-mod0	FALSE
LZ31-1-L_104269_pUBC-YFP-mod0	ku70	3	294	1	TRUE	3:22804127	forward	3	22804127	LB	LZ31-1	18	AAAATAACATTAAGTCGT	0		-9	Col-0	104269	pUBC-YFP-mod0	FALSE
LZ31-1-L_104269_pUBC-YFP-mod0	ku70	9	252	0.888889	TRUE	3:5150213	reverse	3	5150213	LB	LZ31-1	24	GAATATATTCTTAAGCGTCAAAAT	0		-6	Col-0	104269	pUBC-YFP-mod0	FALSE
LZ31-1-L_104269_pUBC-YFP-mod0	ku70	3	287	1	TRUE	3:9148643	forward	3	9148643	LB	LZ31-1	12	TGTGGTGTAAAC	0		-4	Col-0	104269	pUBC-YFP-mod0	FALSE
LZ31-1-L_104269_pUBC-YFP-mod0	ku70	6	213	0.833333	TRUE	3:5878732	forward	3	5878732	LB	LZ31-1	0		2	TA	-17	Col-0	104269	pUBC-YFP-mod0	FALSE
LZ31-1-L_104269_pUBC-YFP-mod0	ku70	7	468	1	TRUE	3:10762090	forward	3	10762090	LB	LZ31-1	3	TTG	0		-10	Col-0	104269	pUBC-YFP-mod0	FALSE
LZ31-1-L_104269_pUBC-YFP-mod0	ku70	10	255	0.9	TRUE	3:11006752	reverse	3	11006752	LB	LZ31-1	16	TCCTATCATAAAGTTG	0		-10	Col-0	104269	pUBC-YFP-mod0	FALSE
LZ31-1-L_104269_pUBC-YFP-mod0	ku70	3	282	1	TRUE	3:5873045	reverse	3	5873045	LB	LZ31-1	0		3	TTG	-21	Col-0	104269	pUBC-YFP-mod0	FALSE
LZ31-1-L_104269_pUBC-YFP-mod0	ku70	3	191	1	TRUE	3:2291083	forward	3	2291083	LB	LZ31-1	0		1	T	-4	Col-0	104269	pUBC-YFP-mod0	FALSE
LZ31-1-L_104269_pUBC-YFP-mod0	ku70	22	428	1	TRUE	3:1758189	reverse	3	1758189	LB	LZ31-1	2	GC	0		0	Col-0	104269	pUBC-YFP-mod0	FALSE
LZ31-1-L_104269_pUBC-YFP-mod0	ku70	3	265	1	TRUE	3:23105647	forward	3	23105647	LB	LZ31-1	0		1	T	-8	Col-0	104269	pUBC-YFP-mod0	FALSE
LZ31-1-L_104269_pUBC-YFP-mod0	ku70	3	299	1	TRUE	3:2245147	forward	3	2245147	LB	LZ31-1	9	GATGAAACG	0		0	Col-0	104269	pUBC-YFP-mod0	FALSE
LZ31-1-L_104269_pUBC-YFP-mod0	ku70	7	330	1	TRUE	3:1756493	forward	3	1756493	LB	LZ31-1	7	GGTCGAT	0		2	Col-0	104269	pUBC-YFP-mod0	FALSE
LZ31-1-L_104269_pUBC-YFP-mod0	ku70	4	400	1	TRUE	3:17968263	reverse	3	17968263	LB	LZ31-1	0		3	CTG	0	Col-0	104269	pUBC-YFP-mod0	FALSE
LZ31-1-L_104269_pUBC-YFP-mod0	ku70	5	229	1	TRUE	3:17545541	forward	3	17545541	LB	LZ31-1	0		0		-20	Col-0	104269	pUBC-YFP-mod0	FALSE
LZ31-1-L_104269_pUBC-YFP-mod0	ku70	3	388	1	TRUE	3:7418390	forward	3	7418390	LB	LZ31-1	8	ATGACAAA	0		0	Col-0	104269	pUBC-YFP-mod0	FALSE
LZ31-1-L_104269_pUBC-YFP-mod0	ku70	4	156	1	TRUE	3:20564842	forward	3	20564842	LB	LZ31-1	0		2	TG	0	Col-0	104269	pUBC-YFP-mod0	FALSE
LZ31-1-L_104269_pUBC-YFP-mod0	ku70	4	279	1	TRUE	3:9358617	reverse	3	9358617	LB	LZ31-1	3	GTG	0		-8	Col-0	104269	pUBC-YFP-mod0	FALSE
LZ31-1-L_104269_pUBC-YFP-mod0	ku70	3	163	1	TRUE	3:3646706	reverse	3	3646706	LB	LZ31-1	0		2	TT	-18	Col-0	104269	pUBC-YFP-mod0	FALSE
LZ31-1-L_104269_pUBC-YFP-mod0	ku70	9	328	1	TRUE	3:4509825	forward	3	4509825	LB	LZ31-1	4	TTGT	0		-10	Col-0	104269	pUBC-YFP-mod0	FALSE
LZ31-1-L_104269_pUBC-YFP-mod0	ku70	3	348	1	TRUE	3:3338989	forward	3	3338989	LB	LZ31-1	1	C	0		-5	Col-0	104269	pUBC-YFP-mod0	FALSE
LZ31-1-L_104269_pUBC-YFP-mod0	ku70	4	255	1	TRUE	3:5832330	reverse	3	5832330	LB	LZ31-1	0		3	CTG	0	Col-0	104269	pUBC-YFP-mod0	FALSE
LZ31-1-L_104269_pUBC-YFP-mod0	ku70	4	194	0.75	TRUE	3:18136763	forward	3	18136763	LB	LZ31-1	5	CGTCC	0		-7	Col-0	104269	pUBC-YFP-mod0	FALSE
LZ31-1-L_104269_pUBC-YFP-mod0	ku70	4	295	1	TRUE	3:16850380	forward	3	16850380	LB	LZ31-1	15	TGTTATTAAGTTGAC	0		0	Col-0	104269	pUBC-YFP-mod0	FALSE
LZ31-1-L_104269_pUBC-YFP-mod0	ku70	3	291	1	TRUE	3:22295817	forward	3	22295817	LB	LZ31-1	4	AGCG	0		-7	Col-0	104269	pUBC-YFP-mod0	FALSE
LZ31-1-L_104269_pUBC-YFP-mod0	ku70	3	167	1	TRUE	3:20892630	reverse	3	20892630	LB	LZ31-1	30	ATGTATAATGCCACCAGTCCACAATCTTGG	0		-9	Col-0	104269	pUBC-YFP-mod0	FALSE
LZ31-1-L_104269_pUBC-YFP-mod0	ku70	6	269	0.833333	TRUE	3:21392209	reverse	3	21392209	LB	LZ31-1	0		3	CTG	0	Col-0	104269	pUBC-YFP-mod0	FALSE
LZ31-1-L_104269_pUBC-YFP-mod0	ku70	4	307	1	TRUE	3:19076378	reverse	3	19076378	LB	LZ31-1	8	GCGAACCT	0		-18	Col-0	104269	pUBC-YFP-mod0	FALSE
LZ31-1-L_104269_pUBC-YFP-mod0	ku70	3	271	1	TRUE	3:11252652	forward	3	11252652	LB	LZ31-1	42	ATATGTCACGGATAGTACACTCCCAACATCCAATAGAAGTTA	0		-29	Col-0	104269	pUBC-YFP-mod0	FALSE
LZ31-1-L_104269_pUBC-YFP-mod0	ku70	6	322	1	TRUE	4:630526	reverse	4	630526	LB	LZ31-1	0		5	TATTA	-42	Col-0	104269	pUBC-YFP-mod0	FALSE
LZ31-1-L_104269_pUBC-YFP-mod0	ku70	74	548	0.932432	TRUE	4:1032347	reverse	4	1032347	LB	LZ31-1	4	CGAC	0		-23	Col-0	104269	pUBC-YFP-mod0	FALSE
LZ31-1-L_104269_pUBC-YFP-mod0	ku70	4	317	1	TRUE	4:2184126	reverse	4	2184126	LB	LZ31-1	0		7	GTGTCAA	-25	Col-0	104269	pUBC-YFP-mod0	FALSE
LZ31-1-L_104269_pUBC-YFP-mod0	ku70	8	344	1	TRUE	4:8761873	forward	4	8761873	LB	LZ31-1	0		2	AA	-25	Col-0	104269	pUBC-YFP-mod0	FALSE
LZ31-1-L_104269_pUBC-YFP-mod0	ku70	4	148	1	TRUE	4:10160255	reverse	4	10160255	LB	LZ31-1	1	G	0		-25	Col-0	104269	pUBC-YFP-mod0	FALSE
LZ31-1-L_104269_pUBC-YFP-mod0	ku70	4	335	1	TRUE	4:10445806	forward	4	10445806	LB	LZ31-1	0		3	TTT	-22	Col-0	104269	pUBC-YFP-mod0	FALSE
LZ31-1-L_104269_pUBC-YFP-mod0	ku70	8	511	0.875	TRUE	4:10466545	forward	4	10466545	LB	LZ31-1	0		4	CTAA	-32	Col-0	104269	pUBC-YFP-mod0	FALSE
LZ31-1-L_104269_pUBC-YFP-mod0	ku70	9	398	0.777778	TRUE	4:10824396	reverse	4	10824396	LB	LZ31-1	2	TG	0		-31	Col-0	104269	pUBC-YFP-mod0	FALSE
LZ31-1-L_104269_pUBC-YFP-mod0	ku70	4	568	1	TRUE	4:11477686	forward	4	11477686	LB	LZ31-1	0		5	ATTTG	-21	Col-0	104269	pUBC-YFP-mod0	FALSE
LZ31-1-L_104269_pUBC-YFP-mod0	ku70	4	194	1	TRUE	4:12476184	forward	4	12476184	LB	LZ31-1	0		1	G	-40	Col-0	104269	pUBC-YFP-mod0	FALSE
LZ31-1-L_104269_pUBC-YFP-mod0	ku70	14	354	0.888889	TRUE	4:12570793	forward	4	12570793	LB	LZ31-1	0		3	GTT	-19	Col-0	104269	pUBC-YFP-mod0	FALSE
LZ31-1-L_104269_pUBC-YFP-mod0	ku70	5	131	1	TRUE	4:13648040	forward	4	13648040	LB	LZ31-1	0		6	ATTTGT	-20	Col-0	104269	pUBC-YFP-mod0	FALSE
LZ31-1-L_104269_pUBC-YFP-mod0	ku70	3	344	1	TRUE	4:14138278	forward	4	14138278	LB	LZ31-1	0		3	TGT	-47	Col-0	104269	pUBC-YFP-mod0	FALSE
LZ31-1-L_104269_pUBC-YFP-mod0	ku70	6	180	0.857143	TRUE	4:14164733	forward	4	14164733	LB	LZ31-1	0		4	CAAT	-24	Col-0	104269	pUBC-YFP-mod0	FALSE
LZ31-1-L_104269_pUBC-YFP-mod0	ku70	9	430	0.9	TRUE	4:14231108	forward	4	14231108	LB	LZ31-1	3	TTG	0		-31	Col-0	104269	pUBC-YFP-mod0	FALSE
LZ31-1-L_104269_pUBC-YFP-mod0	ku70	3	94	1	TRUE	4:15886921	forward	4	15886921	LB	LZ31-1	0		2	TC	-35	Col-0	104269	pUBC-YFP-mod0	FALSE
LZ31-1-L_104269_pUBC-YFP-mod0	ku70	3	458	1	TRUE	4:16401773	reverse	4	16401773	LB	LZ31-1	0		3	CAA	-25	Col-0	104269	pUBC-YFP-mod0	FALSE
LZ31-1-L_104269_pUBC-YFP-mod0	ku70	6	345	1	TRUE	4:16685005	reverse	4	16685005	LB	LZ31-1	0		5	TATTA	-42	Col-0	104269	pUBC-YFP-mod0	FALSE
LZ31-1-L_104269_pUBC-YFP-mod0	ku70	9	279	1	TRUE	4:17866153	forward	4	17866153	LB	LZ31-1	0		4	GTTA	-45	Col-0	104269	pUBC-YFP-mod0	FALSE
LZ31-1-L_104269_pUBC-YFP-mod0	ku70	12	471	1	TRUE	4:6907754	reverse	4	6907754	LB	LZ31-1	2	GG	0		0	Col-0	104269	pUBC-YFP-mod0	FALSE
LZ31-1-L_104269_pUBC-YFP-mod0	ku70	42	438	0.97619	TRUE	4:8279376	forward	4	8279376	LB	LZ31-1	1	A	0		0	Col-0	104269	pUBC-YFP-mod0	FALSE
LZ31-1-L_104269_pUBC-YFP-mod0	ku70	10	320	0.8	TRUE	4:1407435	forward	4	1407435	LB	LZ31-1	2	TC	0		-8	Col-0	104269	pUBC-YFP-mod0	FALSE
LZ31-1-L_104269_pUBC-YFP-mod0	ku70	3	245	1	TRUE	4:15841811	reverse	4	15841811	LB	LZ31-1	9	CTTAACGAC	0		-25	Col-0	104269	pUBC-YFP-mod0	FALSE
LZ31-1-L_104269_pUBC-YFP-mod0	ku70	8	259	1	TRUE	4:17510212	reverse	4	17510212	LB	LZ31-1	0		2	TG	0	Col-0	104269	pUBC-YFP-mod0	FALSE
LZ31-1-L_104269_pUBC-YFP-mod0	ku70	7	314	0.857143	TRUE	4:2113461	reverse	4	2113461	LB	LZ31-1	0		5	TCCTG	0	Col-0	104269	pUBC-YFP-mod0	FALSE
LZ31-1-L_104269_pUBC-YFP-mod0	ku70	39	622	0.923077	TRUE	4:2589471	reverse	4	2589471	LB	LZ31-1	0		4	ACAC	-14	Col-0	104269	pUBC-YFP-mod0	FALSE
LZ31-1-L_104269_pUBC-YFP-mod0	ku70	50	440	0.88	TRUE	4:15292072	forward	4	15292072	LB	LZ31-1	0		4	ACAA	-9	Col-0	104269	pUBC-YFP-mod0	FALSE
LZ31-1-L_104269_pUBC-YFP-mod0	ku70	14	325	0.857143	TRUE	4:1310376	forward	4	1310376	LB	LZ31-1	9	TGACGGGCA	0		0	Col-0	104269	pUBC-YFP-mod0	FALSE
LZ31-1-L_104269_pUBC-YFP-mod0	ku70	13	329	0.923077	TRUE	4:17641209	reverse	4	17641209	LB	LZ31-1	2	CG	0		-6	Col-0	104269	pUBC-YFP-mod0	FALSE
LZ31-1-L_104269_pUBC-YFP-mod0	ku70	10	295	1	TRUE	4:9886408	reverse	4	9886408	LB	LZ31-1	3	CAG	0		-18	Col-0	104269	pUBC-YFP-mod0	FALSE
LZ31-1-L_104269_pUBC-YFP-mod0	ku70	3	204	1	TRUE	4:11901948	forward	4	11901948	LB	LZ31-1	0		1	T	-19	Col-0	104269	pUBC-YFP-mod0	FALSE
LZ31-1-L_104269_pUBC-YFP-mod0	ku70	7	305	1	TRUE	4:2462849	reverse	4	2462849	LB	LZ31-1	7	TCCAATT	0		-16	Col-0	104269	pUBC-YFP-mod0	FALSE
LZ31-1-L_104269_pUBC-YFP-mod0	ku70	23	361	0.826087	TRUE	4:12523541	forward	4	12523541	LB	LZ31-1	20	GTGTGTGTGGTTTTAATTAG	0		0	Col-0	104269	pUBC-YFP-mod0	FALSE
LZ31-1-L_104269_pUBC-YFP-mod0	ku70	10	344	0.8	TRUE	4:6183123	forward	4	6183123	LB	LZ31-1	11	GCAATGTGTTA	0		-3	Col-0	104269	pUBC-YFP-mod0	FALSE
LZ31-1-L_104269_pUBC-YFP-mod0	ku70	8	283	1	TRUE	4:11922403	reverse	4	11922403	LB	LZ31-1	1	T	0		-11	Col-0	104269	pUBC-YFP-mod0	FALSE
LZ31-1-L_104269_pUBC-YFP-mod0	ku70	8	301	1	TRUE	4:13964580	reverse	4	13964580	LB	LZ31-1	16	TGTTATTAAGTTGTCT	0		0	Col-0	104269	pUBC-YFP-mod0	FALSE
LZ31-1-L_104269_pUBC-YFP-mod0	ku70	3	244	1	TRUE	4:14236166	forward	4	14236166	LB	LZ31-1	12	GTCTAAGAGTCT	0		-8	Col-0	104269	pUBC-YFP-mod0	FALSE
LZ31-1-L_104269_pUBC-YFP-mod0	ku70	3	208	1	TRUE	4:10999525	reverse	4	10999525	LB	LZ31-1	0		4	ATAT	-4	Col-0	104269	pUBC-YFP-mod0	FALSE
LZ31-1-L_104269_pUBC-YFP-mod0	ku70	4	293	1	TRUE	4:1068543	reverse	4	1068543	LB	LZ31-1	6	GACTCA	0		-5	Col-0	104269	pUBC-YFP-mod0	FALSE
LZ31-1-L_104269_pUBC-YFP-mod0	ku70	3	206	1	TRUE	4:17798188	forward	4	17798188	LB	LZ31-1	0		3	TAC	-16	Col-0	104269	pUBC-YFP-mod0	FALSE
LZ31-1-L_104269_pUBC-YFP-mod0	ku70	9	263	1	TRUE	4:14983765	forward	4	14983765	LB	LZ31-1	0		5	CACAA	-9	Col-0	104269	pUBC-YFP-mod0	FALSE
LZ31-1-L_104269_pUBC-YFP-mod0	ku70	7	245	0.857143	TRUE	4:12589225	reverse	4	12589225	LB	LZ31-1	2	TA	0		-12	Col-0	104269	pUBC-YFP-mod0	FALSE
LZ31-1-L_104269_pUBC-YFP-mod0	ku70	6	250	1	TRUE	4:8548332	reverse	4	8548332	LB	LZ31-1	6	AGGAAC	0		-9	Col-0	104269	pUBC-YFP-mod0	FALSE
LZ31-1-L_104269_pUBC-YFP-mod0	ku70	4	389	1	TRUE	4:12360497	reverse	4	12360497	LB	LZ31-1	0		2	TG	0	Col-0	104269	pUBC-YFP-mod0	FALSE
LZ31-1-L_104269_pUBC-YFP-mod0	ku70	3	107	1	TRUE	4:9047039	forward	4	9047039	LB	LZ31-1	4	GTGT	0		-8	Col-0	104269	pUBC-YFP-mod0	FALSE
LZ31-1-L_104269_pUBC-YFP-mod0	ku70	4	238	0.75	TRUE	4:1775876	reverse	4	1775876	LB	LZ31-1	0		0		0	Col-0	104269	pUBC-YFP-mod0	FALSE
LZ31-1-L_104269_pUBC-YFP-mod0	ku70	3	316	1	TRUE	4:935037	reverse	4	935037	LB	LZ31-1	5	GTCCA	0		0	Col-0	104269	pUBC-YFP-mod0	FALSE
LZ31-1-L_104269_pUBC-YFP-mod0	ku70	13	426	1	TRUE	4:10988106	reverse	4	10988106	LB	LZ31-1	0		4	TCCT	-1	Col-0	104269	pUBC-YFP-mod0	FALSE
LZ31-1-L_104269_pUBC-YFP-mod0	ku70	3	207	1	TRUE	4:15526463	forward	4	15526463	LB	LZ31-1	0		5	ATATA	-5	Col-0	104269	pUBC-YFP-mod0	FALSE
LZ31-1-L_104269_pUBC-YFP-mod0	ku70	4	353	1	TRUE	4:13954342	forward	4	13954342	LB	LZ31-1	3	AGG	0		1	Col-0	104269	pUBC-YFP-mod0	FALSE
LZ31-1-L_104269_pUBC-YFP-mod0	ku70	4	167	0.75	TRUE	4:15202094	reverse	4	15202094	LB	LZ31-1	0		3	ACA	-15	Col-0	104269	pUBC-YFP-mod0	FALSE
LZ31-1-L_104269_pUBC-YFP-mod0	ku70	5	191	0.8	TRUE	4:6694618	forward	4	6694618	LB	LZ31-1	0		3	AAT	-8	Col-0	104269	pUBC-YFP-mod0	FALSE
LZ31-1-L_104269_pUBC-YFP-mod0	ku70	3	235	1	TRUE	4:641382	forward	4	641382	LB	LZ31-1	0		4	ACAA	-9	Col-0	104269	pUBC-YFP-mod0	FALSE
LZ31-1-L_104269_pUBC-YFP-mod0	ku70	3	361	1	TRUE	4:14880084	reverse	4	14880084	LB	LZ31-1	0		0		-6	Col-0	104269	pUBC-YFP-mod0	FALSE
LZ31-1-L_104269_pUBC-YFP-mod0	ku70	5	338	1	TRUE	4:17135763	forward	4	17135763	LB	LZ31-1	4	TGGT	0		0	Col-0	104269	pUBC-YFP-mod0	FALSE
LZ31-1-L_104269_pUBC-YFP-mod0	ku70	3	299	1	TRUE	4:1540296	forward	4	1540296	LB	LZ31-1	5	TAACA	0		0	Col-0	104269	pUBC-YFP-mod0	FALSE
LZ31-1-L_104269_pUBC-YFP-mod0	ku70	7	330	1	TRUE	4:8872918	reverse	4	8872918	LB	LZ31-1	0		6	TATATC	-3	Col-0	104269	pUBC-YFP-mod0	FALSE
LZ31-1-L_104269_pUBC-YFP-mod0	ku70	3	110	1	TRUE	4:14911427	reverse	4	14911427	LB	LZ31-1	8	TTGTAGAC	0		-8	Col-0	104269	pUBC-YFP-mod0	FALSE
LZ31-1-L_104269_pUBC-YFP-mod0	ku70	3	275	1	TRUE	4:5464177	reverse	4	5464177	LB	LZ31-1	0		0		-7	Col-0	104269	pUBC-YFP-mod0	FALSE
LZ31-1-L_104269_pUBC-YFP-mod0	ku70	4	195	0.75	TRUE	4:15489906	forward	4	15489906	LB	LZ31-1	8	GTGTTATT	0		-24	Col-0	104269	pUBC-YFP-mod0	FALSE
LZ31-1-L_104269_pUBC-YFP-mod0	ku70	8	393	0.875	TRUE	5:750592	forward	5	750592	LB	LZ31-1	0		8	TCAATTTG	-21	Col-0	104269	pUBC-YFP-mod0	FALSE
LZ31-1-L_104269_pUBC-YFP-mod0	ku70	15	273	1	TRUE	5:956391	reverse	5	956391	LB	LZ31-1	0		6	TAAAAA	-61	Col-0	104269	pUBC-YFP-mod0	FALSE
LZ31-1-L_104269_pUBC-YFP-mod0	ku70	3	249	1	TRUE	5:1264637	reverse	5	1264637	LB	LZ31-1	0		0		-24	Col-0	104269	pUBC-YFP-mod0	FALSE
LZ31-1-L_104269_pUBC-YFP-mod0	ku70	5	160	1	TRUE	5:2140726	forward	5	2140726	LB	LZ31-1	0		1	G	-50	Col-0	104269	pUBC-YFP-mod0	FALSE
LZ31-1-L_104269_pUBC-YFP-mod0	ku70	4	299	1	TRUE	5:2652110	reverse	5	2652110	LB	LZ31-1	0		0		-32	Col-0	104269	pUBC-YFP-mod0	FALSE
LZ31-1-L_104269_pUBC-YFP-mod0	ku70	12	337	1	TRUE	5:2906033	forward	5	2906033	LB	LZ31-1	0		5	AATTT	-22	Col-0	104269	pUBC-YFP-mod0	FALSE
LZ31-1-L_104269_pUBC-YFP-mod0	ku70	10	435	0.9	TRUE	5:2942795	reverse	5	2942795	LB	LZ31-1	0		6	TAAGTT	-38	Col-0	104269	pUBC-YFP-mod0	FALSE
LZ31-1-L_104269_pUBC-YFP-mod0	ku70	4	319	0.75	TRUE	5:3475316	reverse	5	3475316	LB	LZ31-1	0		2	TT	-38	Col-0	104269	pUBC-YFP-mod0	FALSE
LZ31-1-L_104269_pUBC-YFP-mod0	ku70	8	292	0.875	TRUE	5:4744173	reverse	5	4744173	LB	LZ31-1	0		5	TTGTT	-19	Col-0	104269	pUBC-YFP-mod0	FALSE
LZ31-1-L_104269_pUBC-YFP-mod0	ku70	3	411	1	TRUE	5:5393561	reverse	5	5393561	LB	LZ31-1	0		1	T	-23	Col-0	104269	pUBC-YFP-mod0	FALSE
LZ31-1-L_104269_pUBC-YFP-mod0	ku70	18	421	0.947368	TRUE	5:6246229	reverse	5	6246229	LB	LZ31-1	0		5	AAAAA	-61	Col-0	104269	pUBC-YFP-mod0	FALSE
LZ31-1-L_104269_pUBC-YFP-mod0	ku70	13	397	1	TRUE	5:8415207	forward	5	8415207	LB	LZ31-1	0		4	TCAA	-25	Col-0	104269	pUBC-YFP-mod0	FALSE
LZ31-1-L_104269_pUBC-YFP-mod0	ku70	26	369	0.923077	TRUE	5:9466963	reverse	5	9466963	LB	LZ31-1	0		5	TTACA	-15	Col-0	104269	pUBC-YFP-mod0	FALSE
LZ31-1-L_104269_pUBC-YFP-mod0	ku70	3	246	1	TRUE	5:14265217	forward	5	14265217	LB	LZ31-1	0		0		-56	Col-0	104269	pUBC-YFP-mod0	FALSE
LZ31-1-L_104269_pUBC-YFP-mod0	ku70	5	312	0.8	TRUE	5:15899442	reverse	5	15899442	LB	LZ31-1	0		0		-29	Col-0	104269	pUBC-YFP-mod0	FALSE
LZ31-1-L_104269_pUBC-YFP-mod0	ku70	3	263	1	TRUE	5:17338609	forward	5	17338609	LB	LZ31-1	0		6	GTTGTC	-35	Col-0	104269	pUBC-YFP-mod0	FALSE
LZ31-1-L_104269_pUBC-YFP-mod0	ku70	5	382	0.8	TRUE	5:18804032	forward	5	18804032	LB	LZ31-1	0		3	ACC	-13	Col-0	104269	pUBC-YFP-mod0	FALSE
LZ31-1-L_104269_pUBC-YFP-mod0	ku70	8	366	1	TRUE	5:19470631	reverse	5	19470631	LB	LZ31-1	0		4	AGTT	-38	Col-0	104269	pUBC-YFP-mod0	FALSE
LZ31-1-L_104269_pUBC-YFP-mod0	ku70	4	387	1	TRUE	5:21481750	reverse	5	21481750	LB	LZ31-1	0		2	AT	-24	Col-0	104269	pUBC-YFP-mod0	FALSE
LZ31-1-L_104269_pUBC-YFP-mod0	ku70	3	341	1	TRUE	5:22821253	reverse	5	22821253	LB	LZ31-1	0		4	CAAT	-24	Col-0	104269	pUBC-YFP-mod0	FALSE
LZ31-1-L_104269_pUBC-YFP-mod0	ku70	3	187	1	TRUE	5:23539560	forward	5	23539560	LB	LZ31-1	0		1	G	-29	Col-0	104269	pUBC-YFP-mod0	FALSE
LZ31-1-L_104269_pUBC-YFP-mod0	ku70	3	301	1	TRUE	5:25739878	forward	5	25739878	LB	LZ31-1	1	A	0		-67	Col-0	104269	pUBC-YFP-mod0	FALSE
LZ31-1-L_104269_pUBC-YFP-mod0	ku70	8	220	0.875	TRUE	5:25875793	forward	5	25875793	LB	LZ31-1	0		4	TTAA	-41	Col-0	104269	pUBC-YFP-mod0	FALSE
LZ31-1-L_104269_pUBC-YFP-mod0	ku70	12	379	0.75	TRUE	5:26157505	reverse	5	26157505	LB	LZ31-1	0		3	GTG	-48	Col-0	104269	pUBC-YFP-mod0	FALSE
LZ31-1-L_104269_pUBC-YFP-mod0	ku70	3	187	1	TRUE	5:26275461	forward	5	26275461	LB	LZ31-1	0		5	AAGTT	-38	Col-0	104269	pUBC-YFP-mod0	FALSE
LZ31-1-L_104269_pUBC-YFP-mod0	ku70	68	584	0.941176	TRUE	5:26818662	reverse	5	26818662	LB	LZ31-1	0		3	TTA	-45	Col-0	104269	pUBC-YFP-mod0	FALSE
LZ31-1-L_104269_pUBC-YFP-mod0	ku70	11	230	0.818182	TRUE	5:6851099	forward	5	6851099	LB	LZ31-1	0		0		-20	Col-0	104269	pUBC-YFP-mod0	FALSE
LZ31-1-L_104269_pUBC-YFP-mod0	ku70	14	598	0.928571	TRUE	5:3319234	reverse	5	3319234	LB	LZ31-1	0		5	ATATA	-5	Col-0	104269	pUBC-YFP-mod0	FALSE
LZ31-1-L_104269_pUBC-YFP-mod0	ku70	5	352	1	TRUE	5:436777	forward	5	436777	LB	LZ31-1	12	ATAGTTTACACT	0		0	Col-0	104269	pUBC-YFP-mod0	FALSE
LZ31-1-L_104269_pUBC-YFP-mod0	ku70	4	468	0.75	TRUE	5:19922118	forward	5	19922118	LB	LZ31-1	6	TTATGG	0		0	Col-0	104269	pUBC-YFP-mod0	FALSE
LZ31-1-L_104269_pUBC-YFP-mod0	ku70	31	423	0.935484	TRUE	5:7933058	forward	5	7933058	LB	LZ31-1	0		0		-5	Col-0	104269	pUBC-YFP-mod0	FALSE
LZ31-1-L_104269_pUBC-YFP-mod0	ku70	82	528	0.939024	TRUE	5:436777	reverse	5	436777	LB	LZ31-1	12	CTGTATTCAATT	0		-10	Col-0	104269	pUBC-YFP-mod0	FALSE
LZ31-1-L_104269_pUBC-YFP-mod0	ku70	19	469	0.842105	TRUE	5:22840649	forward	5	22840649	LB	LZ31-1	2	GT	0		1	Col-0	104269	pUBC-YFP-mod0	FALSE
LZ31-1-L_104269_pUBC-YFP-mod0	ku70	26	341	0.807692	TRUE	5:5057676	reverse	5	5057676	LB	LZ31-1	22	GTGTTATTAAGGCCTATTACCA	0		-8	Col-0	104269	pUBC-YFP-mod0	FALSE
LZ31-1-L_104269_pUBC-YFP-mod0	ku70	10	347	0.9	TRUE	5:16897572	forward	5	16897572	LB	LZ31-1	6	TGGCCC	0		-4	Col-0	104269	pUBC-YFP-mod0	FALSE
LZ31-1-L_104269_pUBC-YFP-mod0	ku70	39	583	0.820513	TRUE	5:24097189	reverse	5	24097189	LB	LZ31-1	6	TGGCGA	0		-1	Col-0	104269	pUBC-YFP-mod0	FALSE
LZ31-1-L_104269_pUBC-YFP-mod0	ku70	4	350	1	TRUE	5:3027395	forward	5	3027395	LB	LZ31-1	0		3	TGT	-20	Col-0	104269	pUBC-YFP-mod0	FALSE
LZ31-1-L_104269_pUBC-YFP-mod0	ku70	19	440	1	TRUE	5:7564145	reverse	5	7564145	LB	LZ31-1	0		5	CACAA	-9	Col-0	104269	pUBC-YFP-mod0	FALSE
LZ31-1-L_104269_pUBC-YFP-mod0	ku70	3	224	1	TRUE	5:3614092	forward	5	3614092	LB	LZ31-1	0		6	TGTTTA	-17	Col-0	104269	pUBC-YFP-mod0	FALSE
LZ31-1-L_104269_pUBC-YFP-mod0	ku70	6	162	1	TRUE	5:494474	reverse	5	494474	LB	LZ31-1	0		4	CAAT	-8	Col-0	104269	pUBC-YFP-mod0	FALSE
LZ31-1-L_104269_pUBC-YFP-mod0	ku70	3	180	1	TRUE	5:18169938	forward	5	18169938	LB	LZ31-1	10	GTGTTATTAA	0		-8	Col-0	104269	pUBC-YFP-mod0	FALSE
LZ31-1-L_104269_pUBC-YFP-mod0	ku70	6	304	0.833333	TRUE	5:79932	forward	5	79932	LB	LZ31-1	16	ATATAATTTCGTGTTT	0		-3	Col-0	104269	pUBC-YFP-mod0	FALSE
LZ31-1-L_104269_pUBC-YFP-mod0	ku70	4	402	0.75	TRUE	5:17502688	forward	5	17502688	LB	LZ31-1	0		1	G	0	Col-0	104269	pUBC-YFP-mod0	FALSE
LZ31-1-L_104269_pUBC-YFP-mod0	ku70	9	436	1	TRUE	5:26790441	forward	5	26790441	LB	LZ31-1	13	TTTTCAGTCGACT	0		-11	Col-0	104269	pUBC-YFP-mod0	FALSE
LZ31-1-L_104269_pUBC-YFP-mod0	ku70	9	352	0.777778	TRUE	5:9411083	reverse	5	9411083	LB	LZ31-1	0		1	G	-21	Col-0	104269	pUBC-YFP-mod0	FALSE
LZ31-1-L_104269_pUBC-YFP-mod0	ku70	26	350	0.846154	TRUE	5:17267793	reverse	5	17267793	LB	LZ31-1	0		0		0	Col-0	104269	pUBC-YFP-mod0	FALSE
LZ31-1-L_104269_pUBC-YFP-mod0	ku70	20	499	0.85	TRUE	5:7375518	reverse	5	7375518	LB	LZ31-1	0		4	CACA	-10	Col-0	104269	pUBC-YFP-mod0	FALSE
LZ31-1-L_104269_pUBC-YFP-mod0	ku70	5	227	1	TRUE	5:991222	reverse	5	991222	LB	LZ31-1	0		3	TTA	-17	Col-0	104269	pUBC-YFP-mod0	FALSE
LZ31-1-L_104269_pUBC-YFP-mod0	ku70	7	349	1	TRUE	5:1125230	forward	5	1125230	LB	LZ31-1	0		3	CCT	-1	Col-0	104269	pUBC-YFP-mod0	FALSE
LZ31-1-L_104269_pUBC-YFP-mod0	ku70	8	236	0.75	TRUE	5:4034526	reverse	5	4034526	LB	LZ31-1	0		5	ATCCT	-1	Col-0	104269	pUBC-YFP-mod0	FALSE
LZ31-1-L_104269_pUBC-YFP-mod0	ku70	19	334	1	TRUE	5:21099764	forward	5	21099764	LB	LZ31-1	6	ATGCAT	0		-23	Col-0	104269	pUBC-YFP-mod0	FALSE
LZ31-1-L_104269_pUBC-YFP-mod0	ku70	3	332	1	TRUE	5:24300760	reverse	5	24300760	LB	LZ31-1	8	TGTGGTGT	0		-4	Col-0	104269	pUBC-YFP-mod0	FALSE
LZ31-1-L_104269_pUBC-YFP-mod0	ku70	6	285	1	TRUE	5:21700493	reverse	5	21700493	LB	LZ31-1	0		3	CAC	-11	Col-0	104269	pUBC-YFP-mod0	FALSE
LZ31-1-L_104269_pUBC-YFP-mod0	ku70	13	427	0.846154	TRUE	5:7893923	reverse	5	7893923	LB	LZ31-1	4	GTGT	0		-24	Col-0	104269	pUBC-YFP-mod0	FALSE
LZ31-1-L_104269_pUBC-YFP-mod0	ku70	7	327	0.857143	TRUE	5:3319219	forward	5	3319219	LB	LZ31-1	13	GCTCATGTTTCTT	0		-3	Col-0	104269	pUBC-YFP-mod0	FALSE
LZ31-1-L_104269_pUBC-YFP-mod0	ku70	25	315	0.92	TRUE	5:6195705	reverse	5	6195705	LB	LZ31-1	21	CTTAGACAACTTAATAATTTT	0		-25	Col-0	104269	pUBC-YFP-mod0	FALSE
LZ31-1-L_104269_pUBC-YFP-mod0	ku70	5	250	1	TRUE	5:19766203	forward	5	19766203	LB	LZ31-1	16	GAAGCCGGCCGATCTG	0		0	Col-0	104269	pUBC-YFP-mod0	FALSE
LZ31-1-L_104269_pUBC-YFP-mod0	ku70	9	259	0.777778	TRUE	5:3403394	reverse	5	3403394	LB	LZ31-1	2	GA	0		0	Col-0	104269	pUBC-YFP-mod0	FALSE
LZ31-1-L_104269_pUBC-YFP-mod0	ku70	5	255	1	TRUE	5:26052979	forward	5	26052979	LB	LZ31-1	10	TAAGGTCACC	0		-11	Col-0	104269	pUBC-YFP-mod0	FALSE
LZ31-1-L_104269_pUBC-YFP-mod0	ku70	6	232	1	TRUE	5:21254422	forward	5	21254422	LB	LZ31-1	14	ACTATATTTGTTTT	0		0	Col-0	104269	pUBC-YFP-mod0	FALSE
LZ31-1-L_104269_pUBC-YFP-mod0	ku70	6	374	1	TRUE	5:9320720	reverse	5	9320720	LB	LZ31-1	13	TGAAATTATCATA	0		-16	Col-0	104269	pUBC-YFP-mod0	FALSE
LZ31-1-L_104269_pUBC-YFP-mod0	ku70	8	353	0.95	TRUE	5:16694441	reverse	5	16694441	LB	LZ31-1	0		2	AT	-6	Col-0	104269	pUBC-YFP-mod0	FALSE
LZ31-1-L_104269_pUBC-YFP-mod0	ku70	10	261	0.9	TRUE	5:26101959	reverse	5	26101959	LB	LZ31-1	0		0		-16	Col-0	104269	pUBC-YFP-mod0	FALSE
LZ31-1-L_104269_pUBC-YFP-mod0	ku70	6	123	1	TRUE	5:17209582	reverse	5	17209582	LB	LZ31-1	1	T	0		-22	Col-0	104269	pUBC-YFP-mod0	FALSE
LZ31-1-L_104269_pUBC-YFP-mod0	ku70	10	398	0.9	TRUE	5:314222	forward	5	314222	LB	LZ31-1	17	CTAAGGGTTTTGCTTAA	0		-20	Col-0	104269	pUBC-YFP-mod0	FALSE
LZ31-1-L_104269_pUBC-YFP-mod0	ku70	5	254	1	TRUE	5:6876659	reverse	5	6876659	LB	LZ31-1	10	CAGCTTATTT	0		-6	Col-0	104269	pUBC-YFP-mod0	FALSE
LZ31-1-L_104269_pUBC-YFP-mod0	ku70	7	436	1	TRUE	5:25602937	reverse	5	25602937	LB	LZ31-1	4	GTGT	0		-24	Col-0	104269	pUBC-YFP-mod0	FALSE
LZ31-1-L_104269_pUBC-YFP-mod0	ku70	9	524	1	TRUE	5:3972010	reverse	5	3972010	LB	LZ31-1	0		3	GTT	-19	Col-0	104269	pUBC-YFP-mod0	FALSE
LZ31-1-L_104269_pUBC-YFP-mod0	ku70	3	243	1	TRUE	5:22365666	forward	5	22365666	LB	LZ31-1	2	GG	0		-12	Col-0	104269	pUBC-YFP-mod0	FALSE
LZ31-1-L_104269_pUBC-YFP-mod0	ku70	6	212	1	TRUE	5:16561788	forward	5	16561788	LB	LZ31-1	0		2	TG	0	Col-0	104269	pUBC-YFP-mod0	FALSE
LZ31-1-L_104269_pUBC-YFP-mod0	ku70	3	165	0.875	TRUE	5:22044143	reverse	5	22044143	LB	LZ31-1	0		2	CT	-1	Col-0	104269	pUBC-YFP-mod0	FALSE
LZ31-1-L_104269_pUBC-YFP-mod0	ku70	4	154	1	TRUE	5:2720578	reverse	5	2720578	LB	LZ31-1	22	TTACACCACAGGATATATTGTG	0		0	Col-0	104269	pUBC-YFP-mod0	FALSE
LZ31-1-L_104269_pUBC-YFP-mod0	ku70	6	430	1	TRUE	5:26012718	reverse	5	26012718	LB	LZ31-1	1	A	0		-2	Col-0	104269	pUBC-YFP-mod0	FALSE
LZ31-1-L_104269_pUBC-YFP-mod0	ku70	3	197	1	TRUE	5:19189027	forward	5	19189027	LB	LZ31-1	6	AATTTA	0		0	Col-0	104269	pUBC-YFP-mod0	FALSE
LZ31-1-L_104269_pUBC-YFP-mod0	ku70	3	287	1	TRUE	5:25705436	forward	5	25705436	LB	LZ31-1	0		6	ATTTGT	-20	Col-0	104269	pUBC-YFP-mod0	FALSE
LZ31-1-L_104269_pUBC-YFP-mod0	ku70	8	265	1	TRUE	5:21669942	reverse	5	21669942	LB	LZ31-1	0		4	AATA	-7	Col-0	104269	pUBC-YFP-mod0	FALSE
LZ31-1-L_104269_pUBC-YFP-mod0	ku70	3	314	1	TRUE	5:7456392	forward	5	7456392	LB	LZ31-1	8	TCAGGAAA	0		-10	Col-0	104269	pUBC-YFP-mod0	FALSE
LZ31-1-L_104269_pUBC-YFP-mod0	ku70	3	106	1	TRUE	5:26296305	forward	5	26296305	LB	LZ31-1	0		2	TA	-5	Col-0	104269	pUBC-YFP-mod0	FALSE
LZ31-1-L_104269_pUBC-YFP-mod0	ku70	5	319	1	TRUE	5:7364638	reverse	5	7364638	LB	LZ31-1	0		0		0	Col-0	104269	pUBC-YFP-mod0	FALSE
LZ31-1-L_104269_pUBC-YFP-mod0	ku70	3	160	0.75	TRUE	5:7701868	reverse	5	7701868	LB	LZ31-1	0		4	ATAT	-6	Col-0	104269	pUBC-YFP-mod0	FALSE
LZ31-1-L_104269_pUBC-YFP-mod0	ku70	4	203	1	TRUE	5:19218176	reverse	5	19218176	LB	LZ31-1	4	TCTG	0		-11	Col-0	104269	pUBC-YFP-mod0	FALSE
LZ31-1-L_104269_pUBC-YFP-mod0	ku70	17	345	0.941176	TRUE	5:5867065	forward	5	5867065	LB	LZ31-1	0		9	TATATCCTG	0	Col-0	104269	pUBC-YFP-mod0	FALSE
LZ31-1-L_104269_pUBC-YFP-mod0	ku70	3	142	1	TRUE	5:8523048	reverse	5	8523048	LB	LZ31-1	0		3	CTG	0	Col-0	104269	pUBC-YFP-mod0	FALSE
LZ31-1-L_104269_pUBC-YFP-mod0	ku70	3	281	1	TRUE	5:8775628	reverse	5	8775628	LB	LZ31-1	20	TGACCGCATTACACCACATT	0		0	Col-0	104269	pUBC-YFP-mod0	FALSE
LZ31-1-L_104269_pUBC-YFP-mod0	ku70	4	386	1	TRUE	5:620907	reverse	5	620907	LB	LZ31-1	15	CGTCAAGAGTAGCGA	0		-1	Col-0	104269	pUBC-YFP-mod0	FALSE
LZ31-1-L_104269_pUBC-YFP-mod0	ku70	3	324	1	TRUE	5:18406613	forward	5	18406613	LB	LZ31-1	0		1	G	0	Col-0	104269	pUBC-YFP-mod0	FALSE
LZ31-1-L_104269_pUBC-YFP-mod0	ku70	5	266	1	TRUE	5:2777911	forward	5	2777911	LB	LZ31-1	0		4	TGCC	2	Col-0	104269	pUBC-YFP-mod0	FALSE
LZ31-1-L_104269_pUBC-YFP-mod0	ku70	4	325	1	TRUE	5:17666943	forward	5	17666943	LB	LZ31-1	0		5	CCACA	-10	Col-0	104269	pUBC-YFP-mod0	FALSE
LZ31-1-L_104269_pUBC-YFP-mod0	ku70	6	193	1	TRUE	5:7030280	forward	5	7030280	LB	LZ31-1	15	TGACCATATGTGGCA	0		-14	Col-0	104269	pUBC-YFP-mod0	FALSE
LZ31-1-L_104269_pUBC-YFP-mod0	ku70	6	303	1	TRUE	Mt:195625	forward	Mt	195625	LB	LZ31-1	12	GGATTGTGGAAC	0		0	Col-0	104269	pUBC-YFP-mod0	FALSE
LZ31-1-R_104269_pUBC-YFP-mod0	ku70	4	234	1	TRUE	1.66667	forward	1	2340	RB	LZ31-1	6	TAAGAA	0		1	Col-0	104269	pUBC-YFP-mod0	FALSE
LZ31-1-R_104269_pUBC-YFP-mod0	ku70	3	276	1	TRUE	1:220706	reverse	1	220706	RB	LZ31-1	29	TAGTTTGTAGGTGGCACGACAGGTTTCCC	0		0	Col-0	104269	pUBC-YFP-mod0	FALSE
LZ31-1-R_104269_pUBC-YFP-mod0	ku70	8	414	0.875	TRUE	1:566912	reverse	1	566912	RB	LZ31-1	18	ATATATCCTGGGTATCCG	0		-8	Col-0	104269	pUBC-YFP-mod0	FALSE
LZ31-1-R_104269_pUBC-YFP-mod0	ku70	3	246	1	TRUE	1:1740103	reverse	1	1740103	RB	LZ31-1	0		3	TGA	0	Col-0	104269	pUBC-YFP-mod0	FALSE
LZ31-1-R_104269_pUBC-YFP-mod0	ku70	6	235	0.833333	TRUE	1:2200207	reverse	1	2200207	RB	LZ31-1	5	ATATT	0		0	Col-0	104269	pUBC-YFP-mod0	FALSE
LZ31-1-R_104269_pUBC-YFP-mod0	ku70	25	455	0.92	TRUE	1:2426719	reverse	1	2426719	RB	LZ31-1	1	A	0		0	Col-0	104269	pUBC-YFP-mod0	FALSE
LZ31-1-R_104269_pUBC-YFP-mod0	ku70	3	248	1	TRUE	1:2977178	forward	1	2977178	RB	LZ31-1	0		3	TTT	-2	Col-0	104269	pUBC-YFP-mod0	FALSE
LZ31-1-R_104269_pUBC-YFP-mod0	ku70	3	350	1	TRUE	1:3596232	reverse	1	3596232	RB	LZ31-1	14	ACACCACTTATTGT	0		-2	Col-0	104269	pUBC-YFP-mod0	FALSE
LZ31-1-R_104269_pUBC-YFP-mod0	ku70	3	157	1	TRUE	1:3702491	reverse	1	3702491	RB	LZ31-1	8	ACTTGGTT	0		0	Col-0	104269	pUBC-YFP-mod0	FALSE
LZ31-1-R_104269_pUBC-YFP-mod0	ku70	32	365	0.9375	TRUE	1:3828557	reverse	1	3828557	RB	LZ31-1	0		4	TTGA	0	Col-0	104269	pUBC-YFP-mod0	FALSE
LZ31-1-R_104269_pUBC-YFP-mod0	ku70	3	256	1	TRUE	1:4678509	forward	1	4678509	RB	LZ31-1	0		9	GCCTTCAGT	-19	Col-0	104269	pUBC-YFP-mod0	FALSE
LZ31-1-R_104269_pUBC-YFP-mod0	ku70	5	446	1	TRUE	1:5862156	forward	1	5862156	RB	LZ31-1	0		6	TTGACA	2	Col-0	104269	pUBC-YFP-mod0	FALSE
LZ31-1-R_104269_pUBC-YFP-mod0	ku70	15	236	0.933333	TRUE	1:6129880	forward	1	6129880	RB	LZ31-1	0		3	TCA	-8	Col-0	104269	pUBC-YFP-mod0	FALSE
LZ31-1-R_104269_pUBC-YFP-mod0	ku70	3	208	1	TRUE	1:6410011	forward	1	6410011	RB	LZ31-1	0		5	GACAG	3	Col-0	104269	pUBC-YFP-mod0	FALSE
LZ31-1-R_104269_pUBC-YFP-mod0	ku70	28	518	0.892857	TRUE	1:7031655	reverse	1	7031655	RB	LZ31-1	0		1	A	0	Col-0	104269	pUBC-YFP-mod0	FALSE
LZ31-1-R_104269_pUBC-YFP-mod0	ku70	5	316	1	TRUE	1:7219788	forward	1	7219788	RB	LZ31-1	0		3	CCT	-24	Col-0	104269	pUBC-YFP-mod0	FALSE
LZ31-1-R_104269_pUBC-YFP-mod0	ku70	4	82	0.75	TRUE	1:7488503	reverse	1	7488503	RB	LZ31-1	21	ATATTTAAAAGTTTTGTCTCT	0		-7	Col-0	104269	pUBC-YFP-mod0	FALSE
LZ31-1-R_104269_pUBC-YFP-mod0	ku70	3	262	1	TRUE	1:7660174	forward	1	7660174	RB	LZ31-1	6	ATTTTG	0		-5	Col-0	104269	pUBC-YFP-mod0	FALSE
LZ31-1-R_104269_pUBC-YFP-mod0	ku70	3	260	1	TRUE	1:8158847	forward	1	8158847	RB	LZ31-1	0		4	AGTT	-18	Col-0	104269	pUBC-YFP-mod0	FALSE
LZ31-1-R_104269_pUBC-YFP-mod0	ku70	4	221	1	TRUE	1:8190836	reverse	1	8190836	RB	LZ31-1	4	ACTG	0		0	Col-0	104269	pUBC-YFP-mod0	FALSE
LZ31-1-R_104269_pUBC-YFP-mod0	ku70	4	269	1	TRUE	1:8307647	reverse	1	8307647	RB	LZ31-1	27	ATGAAAATTGGATATTGAATTAACGGC	0		0	Col-0	104269	pUBC-YFP-mod0	FALSE
LZ31-1-R_104269_pUBC-YFP-mod0	ku70	10	336	1	TRUE	1:9044593	reverse	1	9044593	RB	LZ31-1	4	ACTG	0		0	Col-0	104269	pUBC-YFP-mod0	FALSE
LZ31-1-R_104269_pUBC-YFP-mod0	ku70	4	264	0.8	TRUE	1:9056629	reverse	1	9056629	RB	LZ31-1	47	ATGGCAGCTAGACTGCCATGTCTTCTATGGCAATATATGTAGCAATT	0		-13	Col-0	104269	pUBC-YFP-mod0	FALSE
LZ31-1-R_104269_pUBC-YFP-mod0	ku70	3	316	1	TRUE	1:9251781	forward	1	9251781	RB	LZ31-1	9	TGCATGGCG	0		-27	Col-0	104269	pUBC-YFP-mod0	FALSE
LZ31-1-R_104269_pUBC-YFP-mod0	ku70	3	350	1	TRUE	1:10172286	forward	1	10172286	RB	LZ31-1	4	ACTG	0		0	Col-0	104269	pUBC-YFP-mod0	FALSE
LZ31-1-R_104269_pUBC-YFP-mod0	ku70	4	365	1	TRUE	1:11424148	reverse	1	11424148	RB	LZ31-1	0		2	AA	-15	Col-0	104269	pUBC-YFP-mod0	FALSE
LZ31-1-R_104269_pUBC-YFP-mod0	ku70	3	230	1	TRUE	1:12150403	reverse	1	12150403	RB	LZ31-1	0		1	T	-6	Col-0	104269	pUBC-YFP-mod0	FALSE
LZ31-1-R_104269_pUBC-YFP-mod0	ku70	3	245	1	TRUE	1:12287368	reverse	1	12287368	RB	LZ31-1	0		3	GTG	-5	Col-0	104269	pUBC-YFP-mod0	FALSE
LZ31-1-R_104269_pUBC-YFP-mod0	ku70	14	275	0.857143	TRUE	1:17376412	reverse	1	17376412	RB	LZ31-1	2	TT	0		-1	Col-0	104269	pUBC-YFP-mod0	FALSE
LZ31-1-R_104269_pUBC-YFP-mod0	ku70	3	251	1	TRUE	1:18132657	reverse	1	18132657	RB	LZ31-1	0		1	A	0	Col-0	104269	pUBC-YFP-mod0	FALSE
LZ31-1-R_104269_pUBC-YFP-mod0	ku70	3	158	1	TRUE	1:18138204	forward	1	18138204	RB	LZ31-1	20	AAACTATCAGTTACAATCAT	0		-4	Col-0	104269	pUBC-YFP-mod0	FALSE
LZ31-1-R_104269_pUBC-YFP-mod0	ku70	29	338	0.896552	TRUE	1:18357595	forward	1	18357595	RB	LZ31-1	33	TATATTGTTTATCTTGTTGAAGCATGTACTGAT	0		0	Col-0	104269	pUBC-YFP-mod0	FALSE
LZ31-1-R_104269_pUBC-YFP-mod0	ku70	3	258	1	TRUE	1:18520236	forward	1	18520236	RB	LZ31-1	11	TAGTTTAAATT	0		0	Col-0	104269	pUBC-YFP-mod0	FALSE
LZ31-1-R_104269_pUBC-YFP-mod0	ku70	6	319	1	TRUE	1:19142720	forward	1	19142720	RB	LZ31-1	0		1	T	-10	Col-0	104269	pUBC-YFP-mod0	FALSE
LZ31-1-R_104269_pUBC-YFP-mod0	ku70	17	407	0.941176	TRUE	1:19158970	reverse	1	19158970	RB	LZ31-1	0		4	TTGA	0	Col-0	104269	pUBC-YFP-mod0	FALSE
LZ31-1-R_104269_pUBC-YFP-mod0	ku70	11	315	0.909091	TRUE	1:20082176	forward	1	20082176	RB	LZ31-1	11	AATTGTCGTGC	0		0	Col-0	104269	pUBC-YFP-mod0	FALSE
LZ31-1-R_104269_pUBC-YFP-mod0	ku70	6	203	1	TRUE	1:20559451	reverse	1	20559451	RB	LZ31-1	0		4	TTGA	0	Col-0	104269	pUBC-YFP-mod0	FALSE
LZ31-1-R_104269_pUBC-YFP-mod0	ku70	5	291	0.8	TRUE	1:20792208	forward	1	20792208	RB	LZ31-1	0		3	ACT	-12	Col-0	104269	pUBC-YFP-mod0	FALSE
LZ31-1-R_104269_pUBC-YFP-mod0	ku70	5	219	1	TRUE	1:21082283	reverse	1	21082283	RB	LZ31-1	12	CGCCTCTCATTT	0		-13	Col-0	104269	pUBC-YFP-mod0	FALSE
LZ31-1-R_104269_pUBC-YFP-mod0	ku70	8	471	1	TRUE	1:21448208	forward	1	21448208	RB	LZ31-1	0		6	TGTTTG	-1	Col-0	104269	pUBC-YFP-mod0	FALSE
LZ31-1-R_104269_pUBC-YFP-mod0	ku70	3	225	1	TRUE	1:22051083	forward	1	22051083	RB	LZ31-1	0		3	TGA	0	Col-0	104269	pUBC-YFP-mod0	FALSE
LZ31-1-R_104269_pUBC-YFP-mod0	ku70	3	190	1	TRUE	1:22787093	reverse	1	22787093	RB	LZ31-1	0		2	GA	0	Col-0	104269	pUBC-YFP-mod0	FALSE
LZ31-1-R_104269_pUBC-YFP-mod0	ku70	4	308	1	TRUE	1:23903964	forward	1	23903964	RB	LZ31-1	0		7	TTTGACA	2	Col-0	104269	pUBC-YFP-mod0	FALSE
LZ31-1-R_104269_pUBC-YFP-mod0	ku70	3	278	1	TRUE	1:24096553	reverse	1	24096553	RB	LZ31-1	0		4	TTGA	0	Col-0	104269	pUBC-YFP-mod0	FALSE
LZ31-1-R_104269_pUBC-YFP-mod0	ku70	34	464	0.911765	TRUE	1:25586111	reverse	1	25586111	RB	LZ31-1	3	AAA	0		0	Col-0	104269	pUBC-YFP-mod0	FALSE
LZ31-1-R_104269_pUBC-YFP-mod0	ku70	3	158	1	TRUE	1:26092422	reverse	1	26092422	RB	LZ31-1	11	TTAATGTACAC	0		-17	Col-0	104269	pUBC-YFP-mod0	FALSE
LZ31-1-R_104269_pUBC-YFP-mod0	ku70	11	326	0.818182	TRUE	1:26804785	forward	1	26804785	RB	LZ31-1	27	TAACTTCCCGATCAGATTGCGTATTTG	0		0	Col-0	104269	pUBC-YFP-mod0	FALSE
LZ31-1-R_104269_pUBC-YFP-mod0	ku70	3	188	0.888889	TRUE	1:27025957	reverse	1	27025957	RB	LZ31-1	0		3	TGA	0	Col-0	104269	pUBC-YFP-mod0	FALSE
LZ31-1-R_104269_pUBC-YFP-mod0	ku70	18	345	0.888889	TRUE	1:27039463	forward	1	27039463	RB	LZ31-1	8	ATCTATGT	0		0	Col-0	104269	pUBC-YFP-mod0	FALSE
LZ31-1-R_104269_pUBC-YFP-mod0	ku70	3	485	1	TRUE	1:27589802	forward	1	27589802	RB	LZ31-1	0		3	GTT	-3	Col-0	104269	pUBC-YFP-mod0	FALSE
LZ31-1-R_104269_pUBC-YFP-mod0	ku70	3	119	1	TRUE	1:27759452	forward	1	27759452	RB	LZ31-1	22	TTGATGATATTCACTGGTTTCA	0		0	Col-0	104269	pUBC-YFP-mod0	FALSE
LZ31-1-R_104269_pUBC-YFP-mod0	ku70	5	146	0.8	TRUE	1:27788906	reverse	1	27788906	RB	LZ31-1	50	AATACTTAACCAATTTAGAAAACTTGAATTGGTTTTCCCGCCTTCAGTTT	0		-8	Col-0	104269	pUBC-YFP-mod0	FALSE
LZ31-1-R_104269_pUBC-YFP-mod0	ku70	10	347	1	TRUE	1:28175101	forward	1	28175101	RB	LZ31-1	0		3	TGA	0	Col-0	104269	pUBC-YFP-mod0	FALSE
LZ31-1-R_104269_pUBC-YFP-mod0	ku70	5	348	0.8	TRUE	1:28309220	reverse	1	28309220	RB	LZ31-1	0		4	TGAC	1	Col-0	104269	pUBC-YFP-mod0	FALSE
LZ31-1-R_104269_pUBC-YFP-mod0	ku70	4	349	1	TRUE	1:28380407	reverse	1	28380407	RB	LZ31-1	0		2	GA	0	Col-0	104269	pUBC-YFP-mod0	FALSE
LZ31-1-R_104269_pUBC-YFP-mod0	ku70	8	239	1	TRUE	1:29347899	forward	1	29347899	RB	LZ31-1	11	ACTGATAGTTT	0		0	Col-0	104269	pUBC-YFP-mod0	FALSE
LZ31-1-R_104269_pUBC-YFP-mod0	ku70	3	204	1	TRUE	1:29873032	reverse	1	29873032	RB	LZ31-1	0		4	TTGA	0	Col-0	104269	pUBC-YFP-mod0	FALSE
LZ31-1-R_104269_pUBC-YFP-mod0	ku70	9	469	1	TRUE	1:174852	forward	1	174852	RB	LZ31-1	50	AGGAAACAAAGTGGGAAAAGTATTTAAACTTCAGTTTAAATATATCATGA	0		0	Col-0	104269	pUBC-YFP-mod0	FALSE
LZ31-1-R_104269_pUBC-YFP-mod0	ku70	6	407	0.833333	TRUE	1:7017944	forward	1	7017944	RB	LZ31-1	62	ATCTTCTGTCCACGAGCAATGGTAGCTTAAAACAGATTGTCGTTTCCCGCCATAGATGTTTG	0		0	Col-0	104269	pUBC-YFP-mod0	FALSE
LZ31-1-R_104269_pUBC-YFP-mod0	ku70	10	274	0.9	TRUE	1:14149081	forward	1	14149081	RB	LZ31-1	52	TACCATCTTCATATGTTGTCAGTTTAAACTATCAGTGTTTGATACAAAATAT	0		0	Col-0	104269	pUBC-YFP-mod0	FALSE
LZ31-1-R_104269_pUBC-YFP-mod0	ku70	5	378	0.8	TRUE	1:21093394	reverse	1	21093394	RB	LZ31-1	42	TGTTTCCCGAATCATTGTCGTTTACTACAGCACTAAGTTACA	0		0	Col-0	104269	pUBC-YFP-mod0	FALSE
LZ31-1-R_104269_pUBC-YFP-mod0	ku70	4	254	0.75	TRUE	1:3206887	reverse	1	3206887	RB	LZ31-1	37	AACAGTGATTCAGTTTAAACTCTTTAGCTTTTCTATA	0		0	Col-0	104269	pUBC-YFP-mod0	FALSE
LZ31-1-R_104269_pUBC-YFP-mod0	ku70	9	228	0.888889	TRUE	2:752219	reverse	2	752219	RB	LZ31-1	0		4	CTTC	-22	Col-0	104269	pUBC-YFP-mod0	FALSE
LZ31-1-R_104269_pUBC-YFP-mod0	ku70	3	101	1	TRUE	2:1168613	forward	2	1168613	RB	LZ31-1	0		2	AT	-10	Col-0	104269	pUBC-YFP-mod0	FALSE
LZ31-1-R_104269_pUBC-YFP-mod0	ku70	3	165	1	TRUE	2:2426387	reverse	2	2426387	RB	LZ31-1	0		4	AAAC	-13	Col-0	104269	pUBC-YFP-mod0	FALSE
LZ31-1-R_104269_pUBC-YFP-mod0	ku70	3	186	1	TRUE	2:5514146	forward	2	5514146	RB	LZ31-1	0		4	TTGA	0	Col-0	104269	pUBC-YFP-mod0	FALSE
LZ31-1-R_104269_pUBC-YFP-mod0	ku70	9	356	1	TRUE	2:5793092	reverse	2	5793092	RB	LZ31-1	14	AAGCCTTTGAGAAG	0		-13	Col-0	104269	pUBC-YFP-mod0	FALSE
LZ31-1-R_104269_pUBC-YFP-mod0	ku70	8	562	1	TRUE	2:6920082	forward	2	6920082	RB	LZ31-1	0		3	TGA	0	Col-0	104269	pUBC-YFP-mod0	FALSE
LZ31-1-R_104269_pUBC-YFP-mod0	ku70	4	246	1	TRUE	2:7325843	forward	2	7325843	RB	LZ31-1	0		5	TTTGA	0	Col-0	104269	pUBC-YFP-mod0	FALSE
LZ31-1-R_104269_pUBC-YFP-mod0	ku70	3	272	1	TRUE	2:7802716	reverse	2	7802716	RB	LZ31-1	8	TAGAGCGT	0		0	Col-0	104269	pUBC-YFP-mod0	FALSE
LZ31-1-R_104269_pUBC-YFP-mod0	ku70	5	409	0.8	TRUE	2:8392563	reverse	2	8392563	RB	LZ31-1	27	TTTCGAATGTGTGAGAGTTTAAAGAAT	0		0	Col-0	104269	pUBC-YFP-mod0	FALSE
LZ31-1-R_104269_pUBC-YFP-mod0	ku70	5	348	1	TRUE	2:9042697	reverse	2	9042697	RB	LZ31-1	0		4	CAGT	-6	Col-0	104269	pUBC-YFP-mod0	FALSE
LZ31-1-R_104269_pUBC-YFP-mod0	ku70	9	381	1	TRUE	2:9044420	forward	2	9044420	RB	LZ31-1	28	TCCAATCCTCCGTTGCTAGGTGAATCCT	0		0	Col-0	104269	pUBC-YFP-mod0	FALSE
LZ31-1-R_104269_pUBC-YFP-mod0	ku70	11	271	1	TRUE	2:9693311	forward	2	9693311	RB	LZ31-1	18	TGAAGTTGTCTAAGCTAC	0		-17	Col-0	104269	pUBC-YFP-mod0	FALSE
LZ31-1-R_104269_pUBC-YFP-mod0	ku70	10	273	0.9	TRUE	2:9823987	reverse	2	9823987	RB	LZ31-1	14	CTTGGATCAAAGTC	0		-5	Col-0	104269	pUBC-YFP-mod0	FALSE
LZ31-1-R_104269_pUBC-YFP-mod0	ku70	7	340	1	TRUE	2:9916113	reverse	2	9916113	RB	LZ31-1	0		3	TAT	-10	Col-0	104269	pUBC-YFP-mod0	FALSE
LZ31-1-R_104269_pUBC-YFP-mod0	ku70	8	344	0.888889	TRUE	2:9994063	reverse	2	9994063	RB	LZ31-1	33	GCGTTATTAAGTTGTCTAAGCGTCAATTTGTCT	0		0	Col-0	104269	pUBC-YFP-mod0	FALSE
LZ31-1-R_104269_pUBC-YFP-mod0	ku70	3	235	1	TRUE	2:10305871	reverse	2	10305871	RB	LZ31-1	23	GCTTGGATCTCGGTAATCATAGA	0		1	Col-0	104269	pUBC-YFP-mod0	FALSE
LZ31-1-R_104269_pUBC-YFP-mod0	ku70	5	218	0.8	TRUE	2:11894490	forward	2	11894490	RB	LZ31-1	2	AA	0		-2	Col-0	104269	pUBC-YFP-mod0	FALSE
LZ31-1-R_104269_pUBC-YFP-mod0	ku70	9	250	0.888889	TRUE	2:12134639	reverse	2	12134639	RB	LZ31-1	0		1	G	-7	Col-0	104269	pUBC-YFP-mod0	FALSE
LZ31-1-R_104269_pUBC-YFP-mod0	ku70	3	293	1	TRUE	2:12230536	forward	2	12230536	RB	LZ31-1	0		5	AGTGT	-4	Col-0	104269	pUBC-YFP-mod0	FALSE
LZ31-1-R_104269_pUBC-YFP-mod0	ku70	4	418	1	TRUE	2:12519190	forward	2	12519190	RB	LZ31-1	0		4	GACA	2	Col-0	104269	pUBC-YFP-mod0	FALSE
LZ31-1-R_104269_pUBC-YFP-mod0	ku70	4	250	1	TRUE	2:13464221	forward	2	13464221	RB	LZ31-1	2	AG	0		0	Col-0	104269	pUBC-YFP-mod0	FALSE
LZ31-1-R_104269_pUBC-YFP-mod0	ku70	5	130	1	TRUE	2:15098672	forward	2	15098672	RB	LZ31-1	16	ATTATTGACACAAAAT	0		0	Col-0	104269	pUBC-YFP-mod0	FALSE
LZ31-1-R_104269_pUBC-YFP-mod0	ku70	18	353	1	TRUE	2:15098826	reverse	2	15098826	RB	LZ31-1	0		1	A	0	Col-0	104269	pUBC-YFP-mod0	FALSE
LZ31-1-R_104269_pUBC-YFP-mod0	ku70	10	289	1	TRUE	2:15768535	forward	2	15768535	RB	LZ31-1	0		5	CAGTG	-5	Col-0	104269	pUBC-YFP-mod0	FALSE
LZ31-1-R_104269_pUBC-YFP-mod0	ku70	4	379	1	TRUE	2:16222302	forward	2	16222302	RB	LZ31-1	0		1	T	-3	Col-0	104269	pUBC-YFP-mod0	FALSE
LZ31-1-R_104269_pUBC-YFP-mod0	ku70	6	511	1	TRUE	2:16689730	forward	2	16689730	RB	LZ31-1	0		5	CCTTC	-22	Col-0	104269	pUBC-YFP-mod0	FALSE
LZ31-1-R_104269_pUBC-YFP-mod0	ku70	8	216	1	TRUE	2:17138024	forward	2	17138024	RB	LZ31-1	5	GGGTA	0		1	Col-0	104269	pUBC-YFP-mod0	FALSE
LZ31-1-R_104269_pUBC-YFP-mod0	ku70	6	302	0.833333	TRUE	2:17138069	reverse	2	17138069	RB	LZ31-1	0		3	GTT	-3	Col-0	104269	pUBC-YFP-mod0	FALSE
LZ31-1-R_104269_pUBC-YFP-mod0	ku70	4	178	1	TRUE	2:17467063	forward	2	17467063	RB	LZ31-1	0		0		-4	Col-0	104269	pUBC-YFP-mod0	FALSE
LZ31-1-R_104269_pUBC-YFP-mod0	ku70	4	235	1	TRUE	2:17602844	reverse	2	17602844	RB	LZ31-1	3	AAA	0		-2	Col-0	104269	pUBC-YFP-mod0	FALSE
LZ31-1-R_104269_pUBC-YFP-mod0	ku70	9	361	0.777778	TRUE	2:18296789	forward	2	18296789	RB	LZ31-1	0		4	GTTT	-2	Col-0	104269	pUBC-YFP-mod0	FALSE
LZ31-1-R_104269_pUBC-YFP-mod0	ku70	12	329	1	TRUE	2:19136479	reverse	2	19136479	RB	LZ31-1	0		3	TGA	0	Col-0	104269	pUBC-YFP-mod0	FALSE
LZ31-1-R_104269_pUBC-YFP-mod0	ku70	4	161	1	TRUE	2:19149309	reverse	2	19149309	RB	LZ31-1	0		2	GA	0	Col-0	104269	pUBC-YFP-mod0	FALSE
LZ31-1-R_104269_pUBC-YFP-mod0	ku70	14	472	0.928571	TRUE	2:19598885	forward	2	19598885	RB	LZ31-1	0		4	TTGA	0	Col-0	104269	pUBC-YFP-mod0	FALSE
LZ31-1-R_104269_pUBC-YFP-mod0	ku70	3	128	1	TRUE	2:15585573	forward	2	15585573	RB	LZ31-1	49	GCTTAGACATTTTGGTGTAAACAAATGTCTAAACAAATTGACGTATTGG	0		1	Col-0	104269	pUBC-YFP-mod0	FALSE
LZ31-1-R_104269_pUBC-YFP-mod0	ku70	3	294	1	TRUE	2:15321693	forward	2	15321693	RB	LZ31-1	37	ATAAAGTTTCTAACCCCAAGGTTTCTAGACGCTTAGA	0		0	Col-0	104269	pUBC-YFP-mod0	FALSE
LZ31-1-R_104269_pUBC-YFP-mod0	ku70	4	241	1	TRUE	2:15122848	forward	2	15122848	RB	LZ31-1	60	TACAGTCAGTTTTCACGACCAATCTCAAATGCTGCATTAATTCCCGCCTCCACCACAATA	0		0	Col-0	104269	pUBC-YFP-mod0	FALSE
LZ31-1-R_104269_pUBC-YFP-mod0	ku70	4	156	1	TRUE	3:88623	reverse	3	88623	RB	LZ31-1	0		4	TTGA	0	Col-0	104269	pUBC-YFP-mod0	FALSE
LZ31-1-R_104269_pUBC-YFP-mod0	ku70	8	267	0.875	TRUE	3:168449	reverse	3	168449	RB	LZ31-1	6	ACAAAT	0		0	Col-0	104269	pUBC-YFP-mod0	FALSE
LZ31-1-R_104269_pUBC-YFP-mod0	ku70	7	297	1	TRUE	3:185084	forward	3	185084	RB	LZ31-1	21	ACTGAAGCCTATATTCAAGAG	0		0	Col-0	104269	pUBC-YFP-mod0	FALSE
LZ31-1-R_104269_pUBC-YFP-mod0	ku70	4	356	0.75	TRUE	3:376469	reverse	3	376469	RB	LZ31-1	24	TGGGAACTTCTAAGACGATCACAT	0		0	Col-0	104269	pUBC-YFP-mod0	FALSE
LZ31-1-R_104269_pUBC-YFP-mod0	ku70	4	376	1	TRUE	3:750952	reverse	3	750952	RB	LZ31-1	0		6	GTTTGA	0	Col-0	104269	pUBC-YFP-mod0	FALSE
LZ31-1-R_104269_pUBC-YFP-mod0	ku70	4	486	1	TRUE	3:767114	forward	3	767114	RB	LZ31-1	0		0		-7	Col-0	104269	pUBC-YFP-mod0	FALSE
LZ31-1-R_104269_pUBC-YFP-mod0	ku70	4	139	0.75	TRUE	3:1234184	reverse	3	1234184	RB	LZ31-1	21	GTATAACTAAGACCACAAGAT	0		-1	Col-0	104269	pUBC-YFP-mod0	FALSE
LZ31-1-R_104269_pUBC-YFP-mod0	ku70	3	208	1	TRUE	3:1599494	reverse	3	1599494	RB	LZ31-1	51	AACACTGATATTAGTAGTGTTAAAGCTCCTAGAATCACAATTCGCTAGCTG	0		-21	Col-0	104269	pUBC-YFP-mod0	FALSE
LZ31-1-R_104269_pUBC-YFP-mod0	ku70	12	379	1	TRUE	3:1629023	forward	3	1629023	RB	LZ31-1	0		1	A	0	Col-0	104269	pUBC-YFP-mod0	FALSE
LZ31-1-R_104269_pUBC-YFP-mod0	ku70	3	331	1	TRUE	3:2274767	reverse	3	2274767	RB	LZ31-1	17	AACACATTAAACTATCA	0		0	Col-0	104269	pUBC-YFP-mod0	FALSE
LZ31-1-R_104269_pUBC-YFP-mod0	ku70	3	272	1	TRUE	3:2605618	reverse	3	2605618	RB	LZ31-1	25	CACCACAATATATCCCGCCTTCAGT	0		-1	Col-0	104269	pUBC-YFP-mod0	FALSE
LZ31-1-R_104269_pUBC-YFP-mod0	ku70	5	297	1	TRUE	3:3605102	forward	3	3605102	RB	LZ31-1	10	TCATTTTTAC	0		0	Col-0	104269	pUBC-YFP-mod0	FALSE
LZ31-1-R_104269_pUBC-YFP-mod0	ku70	4	324	1	TRUE	3:4123892	reverse	3	4123892	RB	LZ31-1	0		1	A	0	Col-0	104269	pUBC-YFP-mod0	FALSE
LZ31-1-R_104269_pUBC-YFP-mod0	ku70	3	242	1	TRUE	3:4320382	forward	3	4320382	RB	LZ31-1	0		2	TG	-5	Col-0	104269	pUBC-YFP-mod0	FALSE
LZ31-1-R_104269_pUBC-YFP-mod0	ku70	18	356	1	TRUE	3:5878772	reverse	3	5878772	RB	LZ31-1	6	ACTCGG	0		0	Col-0	104269	pUBC-YFP-mod0	FALSE
LZ31-1-R_104269_pUBC-YFP-mod0	ku70	5	211	1	TRUE	3:5960502	reverse	3	5960502	RB	LZ31-1	0		4	ATCA	-8	Col-0	104269	pUBC-YFP-mod0	FALSE
LZ31-1-R_104269_pUBC-YFP-mod0	ku70	7	625	0.857143	TRUE	3:6342390	reverse	3	6342390	RB	LZ31-1	9	GTCCCGCAA	0		-13	Col-0	104269	pUBC-YFP-mod0	FALSE
LZ31-1-R_104269_pUBC-YFP-mod0	ku70	4	327	1	TRUE	3:6392999	forward	3	6392999	RB	LZ31-1	30	ACTATCACAATTTGTTTACACCACAATTTG	0		0	Col-0	104269	pUBC-YFP-mod0	FALSE
LZ31-1-R_104269_pUBC-YFP-mod0	ku70	5	215	1	TRUE	3:6882344	forward	3	6882344	RB	LZ31-1	0		5	TGTTT	-2	Col-0	104269	pUBC-YFP-mod0	FALSE
LZ31-1-R_104269_pUBC-YFP-mod0	ku70	9	524	0.888889	TRUE	3:7072951	reverse	3	7072951	RB	LZ31-1	27	ACTAATAACTAATCTATTCTGGAGAAC	0		0	Col-0	104269	pUBC-YFP-mod0	FALSE
LZ31-1-R_104269_pUBC-YFP-mod0	ku70	3	332	1	TRUE	3:7191428	reverse	3	7191428	RB	LZ31-1	33	GGGATTATCAGCTTGCATGCCGGTCGTTGTACC	0		1	Col-0	104269	pUBC-YFP-mod0	FALSE
LZ31-1-R_104269_pUBC-YFP-mod0	ku70	3	308	1	TRUE	3:8789272	reverse	3	8789272	RB	LZ31-1	0		2	TA	-11	Col-0	104269	pUBC-YFP-mod0	FALSE
LZ31-1-R_104269_pUBC-YFP-mod0	ku70	38	500	0.921053	TRUE	3:8929294	forward	3	8929294	RB	LZ31-1	10	GCTTTCTATG	0		1	Col-0	104269	pUBC-YFP-mod0	FALSE
LZ31-1-R_104269_pUBC-YFP-mod0	ku70	6	251	0.833333	TRUE	3:9358601	forward	3	9358601	RB	LZ31-1	0		5	GTGTT	-3	Col-0	104269	pUBC-YFP-mod0	FALSE
LZ31-1-R_104269_pUBC-YFP-mod0	ku70	14	300	0.857143	TRUE	3:10652818	reverse	3	10652818	RB	LZ31-1	0		3	ACT	-12	Col-0	104269	pUBC-YFP-mod0	FALSE
LZ31-1-R_104269_pUBC-YFP-mod0	ku70	16	469	0.875	TRUE	3:10736898	reverse	3	10736898	RB	LZ31-1	0		3	TGA	0	Col-0	104269	pUBC-YFP-mod0	FALSE
LZ31-1-R_104269_pUBC-YFP-mod0	ku70	21	385	1	TRUE	3:11364744	forward	3	11364744	RB	LZ31-1	9	ATTGCGTAT	0		-20	Col-0	104269	pUBC-YFP-mod0	FALSE
LZ31-1-R_104269_pUBC-YFP-mod0	ku70	7	356	0.857143	TRUE	3:12452076	forward	3	12452076	RB	LZ31-1	0		4	TTGA	0	Col-0	104269	pUBC-YFP-mod0	FALSE
LZ31-1-R_104269_pUBC-YFP-mod0	ku70	7	306	0.857143	TRUE	3:16703542	reverse	3	16703542	RB	LZ31-1	0		4	TTTG	-1	Col-0	104269	pUBC-YFP-mod0	FALSE
LZ31-1-R_104269_pUBC-YFP-mod0	ku70	21	214	0.857143	TRUE	3:17387784	forward	3	17387784	RB	LZ31-1	16	ATTTGTAAACGTCCGC	0		-8	Col-0	104269	pUBC-YFP-mod0	FALSE
LZ31-1-R_104269_pUBC-YFP-mod0	ku70	4	208	1	TRUE	3:18340080	reverse	3	18340080	RB	LZ31-1	0		6	CCTTCA	-21	Col-0	104269	pUBC-YFP-mod0	FALSE
LZ31-1-R_104269_pUBC-YFP-mod0	ku70	3	177	1	TRUE	3:18820820	forward	3	18820820	RB	LZ31-1	4	ATAC	0		0	Col-0	104269	pUBC-YFP-mod0	FALSE
LZ31-1-R_104269_pUBC-YFP-mod0	ku70	21	459	0.909091	TRUE	3:19393164	reverse	3	19393164	RB	LZ31-1	0		1	A	0	Col-0	104269	pUBC-YFP-mod0	FALSE
LZ31-1-R_104269_pUBC-YFP-mod0	ku70	3	213	1	TRUE	3:19448843	reverse	3	19448843	RB	LZ31-1	4	ATGT	0		-4	Col-0	104269	pUBC-YFP-mod0	FALSE
LZ31-1-R_104269_pUBC-YFP-mod0	ku70	6	342	0.833333	TRUE	3:19597735	forward	3	19597735	RB	LZ31-1	2	CA	0		-16	Col-0	104269	pUBC-YFP-mod0	FALSE
LZ31-1-R_104269_pUBC-YFP-mod0	ku70	35	533	0.974359	TRUE	3:19698423	reverse	3	19698423	RB	LZ31-1	0		2	GC	-26	Col-0	104269	pUBC-YFP-mod0	FALSE
LZ31-1-R_104269_pUBC-YFP-mod0	ku70	3	213	1	TRUE	3:20024709	forward	3	20024709	RB	LZ31-1	4	TATC	0		0	Col-0	104269	pUBC-YFP-mod0	FALSE
LZ31-1-R_104269_pUBC-YFP-mod0	ku70	9	365	1	TRUE	3:20471183	reverse	3	20471183	RB	LZ31-1	0		1	A	0	Col-0	104269	pUBC-YFP-mod0	FALSE
LZ31-1-R_104269_pUBC-YFP-mod0	ku70	4	93	1	TRUE	3:21009438	reverse	3	21009438	RB	LZ31-1	2	GA	0		-17	Col-0	104269	pUBC-YFP-mod0	FALSE
LZ31-1-R_104269_pUBC-YFP-mod0	ku70	5	462	1	TRUE	3:21037139	reverse	3	21037139	RB	LZ31-1	7	ACAAGCT	0		0	Col-0	104269	pUBC-YFP-mod0	FALSE
LZ31-1-R_104269_pUBC-YFP-mod0	ku70	5	264	1	TRUE	3:21713906	reverse	3	21713906	RB	LZ31-1	19	GTTATTAAGTTGTCTAAAC	0		-19	Col-0	104269	pUBC-YFP-mod0	FALSE
LZ31-1-R_104269_pUBC-YFP-mod0	ku70	5	167	0.8	TRUE	3:22771612	reverse	3	22771612	RB	LZ31-1	30	GATTAAACTATCAGATTCACCATCTTCTCA	0		-5	Col-0	104269	pUBC-YFP-mod0	FALSE
LZ31-1-R_104269_pUBC-YFP-mod0	ku70	5	178	0.833333	TRUE	3:22900304	reverse	3	22900304	RB	LZ31-1	41	TGGTCGTCCGTCCACTCCTGCGGTTCATGCCAAGCTGTTCA	0		-8	Col-0	104269	pUBC-YFP-mod0	FALSE
LZ31-1-R_104269_pUBC-YFP-mod0	ku70	3	211	1	TRUE	3:23046699	reverse	3	23046699	RB	LZ31-1	0		3	CCT	-24	Col-0	104269	pUBC-YFP-mod0	FALSE
LZ31-1-R_104269_pUBC-YFP-mod0	ku70	3	445	1	TRUE	3:23049609	forward	3	23049609	RB	LZ31-1	8	TTATATGG	0		0	Col-0	104269	pUBC-YFP-mod0	FALSE
LZ31-1-R_104269_pUBC-YFP-mod0	ku70	3	139	1	TRUE	3:23362880	reverse	3	23362880	RB	LZ31-1	19	TAGTTTAATTCAGTACATT	0		0	Col-0	104269	pUBC-YFP-mod0	FALSE
LZ31-1-R_104269_pUBC-YFP-mod0	ku70	3	256	1	TRUE	3:23363107	reverse	3	23363107	RB	LZ31-1	7	TAATCTA	0		0	Col-0	104269	pUBC-YFP-mod0	FALSE
LZ31-1-R_104269_pUBC-YFP-mod0	ku70	6	144	1	TRUE	3:9745760	reverse	3	9745760	RB	LZ31-1	35	CAATGGATATGATACGAATGTAATTGTAGCCAATG	0		3	Col-0	104269	pUBC-YFP-mod0	FALSE
LZ31-1-R_104269_pUBC-YFP-mod0	ku70	13	312	0.846154	TRUE	3:11006748	forward	3	11006748	RB	LZ31-1	41	ATCTTACATAGTTGTGAATTCTGTATCCACGTTTCACAAGT	0		0	Col-0	104269	pUBC-YFP-mod0	FALSE
LZ31-1-R_104269_pUBC-YFP-mod0	ku70	3	198	1	TRUE	3:7774938	reverse	3	7774938	RB	LZ31-1	45	ACGACAATTTGTAAGTCGTTCAAATTCGGCGGAAGTGTATTGACG	0		0	Col-0	104269	pUBC-YFP-mod0	FALSE
LZ31-1-R_104269_pUBC-YFP-mod0	ku70	4	586	0.75	TRUE	3:7208702	forward	3	7208702	RB	LZ31-1	50	TTTATGGTTTCTTCTTTTGATTTTGGTTTCCCGCCCATAAACCATATGGG	0		0	Col-0	104269	pUBC-YFP-mod0	FALSE
LZ31-1-R_104269_pUBC-YFP-mod0	ku70	4	236	1	TRUE	Pt:123536	reverse	Pt	123536	RB	LZ31-1	0		1	A	0	Col-0	104269	pUBC-YFP-mod0	FALSE
LZ31-1-R_104269_pUBC-YFP-mod0	ku70	3	165	1	TRUE	4:1407442	reverse	4	1407442	RB	LZ31-1	0		5	TCAGT	-6	Col-0	104269	pUBC-YFP-mod0	FALSE
LZ31-1-R_104269_pUBC-YFP-mod0	ku70	3	165	1	TRUE	4:1407451	reverse	4	1407451	RB	LZ31-1	0		1	A	0	Col-0	104269	pUBC-YFP-mod0	FALSE
LZ31-1-R_104269_pUBC-YFP-mod0	ku70	3	157	1	TRUE	4:2031492	forward	4	2031492	RB	LZ31-1	26	CCACATCGCTTAGGAATCTTTTCATA	0		-21	Col-0	104269	pUBC-YFP-mod0	FALSE
LZ31-1-R_104269_pUBC-YFP-mod0	ku70	5	207	1	TRUE	4:2381407	forward	4	2381407	RB	LZ31-1	29	ACAAATTGAAAACAAATTGACGCTTACTG	0		-2	Col-0	104269	pUBC-YFP-mod0	FALSE
LZ31-1-R_104269_pUBC-YFP-mod0	ku70	6	404	0.833333	TRUE	4:2462805	forward	4	2462805	RB	LZ31-1	7	TAGTTTA	0		0	Col-0	104269	pUBC-YFP-mod0	FALSE
LZ31-1-R_104269_pUBC-YFP-mod0	ku70	8	92	1	TRUE	4:6182443	reverse	4	6182443	RB	LZ31-1	0		2	GA	0	Col-0	104269	pUBC-YFP-mod0	FALSE
LZ31-1-R_104269_pUBC-YFP-mod0	ku70	8	269	1	TRUE	4:6840019	reverse	4	6840019	RB	LZ31-1	0		3	ACT	-12	Col-0	104269	pUBC-YFP-mod0	FALSE
LZ31-1-R_104269_pUBC-YFP-mod0	ku70	3	407	1	TRUE	4:7001527	forward	4	7001527	RB	LZ31-1	0		4	CCTT	-23	Col-0	104269	pUBC-YFP-mod0	FALSE
LZ31-1-R_104269_pUBC-YFP-mod0	ku70	13	181	1	TRUE	4:7669748	forward	4	7669748	RB	LZ31-1	7	ACTGAAG	0		0	Col-0	104269	pUBC-YFP-mod0	FALSE
LZ31-1-R_104269_pUBC-YFP-mod0	ku70	11	184	0.818182	TRUE	4:8387892	forward	4	8387892	RB	LZ31-1	0		0		-1	Col-0	104269	pUBC-YFP-mod0	FALSE
LZ31-1-R_104269_pUBC-YFP-mod0	ku70	7	363	1	TRUE	4:9090400	reverse	4	9090400	RB	LZ31-1	4	TTTG	0		0	Col-0	104269	pUBC-YFP-mod0	FALSE
LZ31-1-R_104269_pUBC-YFP-mod0	ku70	8	214	1	TRUE	4:9973762	reverse	4	9973762	RB	LZ31-1	30	GTTAGCTCCCCGACCGGCAGCTAAGCCTGT	0		0	Col-0	104269	pUBC-YFP-mod0	FALSE
LZ31-1-R_104269_pUBC-YFP-mod0	ku70	5	340	1	TRUE	4:10049303	forward	4	10049303	RB	LZ31-1	0		0		-6	Col-0	104269	pUBC-YFP-mod0	FALSE
LZ31-1-R_104269_pUBC-YFP-mod0	ku70	4	270	0.75	TRUE	4:10720519	forward	4	10720519	RB	LZ31-1	0		4	GACA	2	Col-0	104269	pUBC-YFP-mod0	FALSE
LZ31-1-R_104269_pUBC-YFP-mod0	ku70	9	297	1	TRUE	4:10999501	forward	4	10999501	RB	LZ31-1	0		1	A	0	Col-0	104269	pUBC-YFP-mod0	FALSE
LZ31-1-R_104269_pUBC-YFP-mod0	ku70	3	210	1	TRUE	4:11893092	forward	4	11893092	RB	LZ31-1	0		4	AGTG	-5	Col-0	104269	pUBC-YFP-mod0	FALSE
LZ31-1-R_104269_pUBC-YFP-mod0	ku70	5	218	1	TRUE	4:11922359	forward	4	11922359	RB	LZ31-1	0		1	A	0	Col-0	104269	pUBC-YFP-mod0	FALSE
LZ31-1-R_104269_pUBC-YFP-mod0	ku70	4	143	1	TRUE	4:12493917	forward	4	12493917	RB	LZ31-1	0		5	GTGTT	-3	Col-0	104269	pUBC-YFP-mod0	FALSE
LZ31-1-R_104269_pUBC-YFP-mod0	ku70	6	147	1	TRUE	4:13154679	reverse	4	13154679	RB	LZ31-1	13	GGTTCAGTCTCAT	0		-9	Col-0	104269	pUBC-YFP-mod0	FALSE
LZ31-1-R_104269_pUBC-YFP-mod0	ku70	3	195	1	TRUE	4:13269278	reverse	4	13269278	RB	LZ31-1	32	TAGTTTTCTTCAAATTTAAGACAATTGATATA	0		0	Col-0	104269	pUBC-YFP-mod0	FALSE
LZ31-1-R_104269_pUBC-YFP-mod0	ku70	3	317	1	TRUE	4:13664670	reverse	4	13664670	RB	LZ31-1	0		1	T	-6	Col-0	104269	pUBC-YFP-mod0	FALSE
LZ31-1-R_104269_pUBC-YFP-mod0	ku70	3	231	1	TRUE	4:13761552	forward	4	13761552	RB	LZ31-1	0		2	TT	-3	Col-0	104269	pUBC-YFP-mod0	FALSE
LZ31-1-R_104269_pUBC-YFP-mod0	ku70	8	215	0.875	TRUE	4:14164822	reverse	4	14164822	RB	LZ31-1	14	TGTTGTGAACGTAC	0		0	Col-0	104269	pUBC-YFP-mod0	FALSE
LZ31-1-R_104269_pUBC-YFP-mod0	ku70	4	229	1	TRUE	4:14165701	reverse	4	14165701	RB	LZ31-1	2	CT	0		-7	Col-0	104269	pUBC-YFP-mod0	FALSE
LZ31-1-R_104269_pUBC-YFP-mod0	ku70	7	244	1	TRUE	4:14231108	reverse	4	14231108	RB	LZ31-1	1	A	0		-2	Col-0	104269	pUBC-YFP-mod0	FALSE
LZ31-1-R_104269_pUBC-YFP-mod0	ku70	3	185	1	TRUE	4:14236221	reverse	4	14236221	RB	LZ31-1	10	ACTGATAGTT	0		0	Col-0	104269	pUBC-YFP-mod0	FALSE
LZ31-1-R_104269_pUBC-YFP-mod0	ku70	3	288	1	TRUE	4:14880057	forward	4	14880057	RB	LZ31-1	1	A	0		-4	Col-0	104269	pUBC-YFP-mod0	FALSE
LZ31-1-R_104269_pUBC-YFP-mod0	ku70	13	272	0.846154	TRUE	4:14952532	forward	4	14952532	RB	LZ31-1	2	CG	0		-13	Col-0	104269	pUBC-YFP-mod0	FALSE
LZ31-1-R_104269_pUBC-YFP-mod0	ku70	5	155	1	TRUE	4:15202037	forward	4	15202037	RB	LZ31-1	1	A	0		-10	Col-0	104269	pUBC-YFP-mod0	FALSE
LZ31-1-R_104269_pUBC-YFP-mod0	ku70	5	207	1	TRUE	4:15841803	forward	4	15841803	RB	LZ31-1	17	GGTGTCATCTATGTTAC	0		-9	Col-0	104269	pUBC-YFP-mod0	FALSE
LZ31-1-R_104269_pUBC-YFP-mod0	ku70	5	166	0.8	TRUE	4:15862112	reverse	4	15862112	RB	LZ31-1	23	GAACCTATTTATATATTGCAATG	0		-17	Col-0	104269	pUBC-YFP-mod0	FALSE
LZ31-1-R_104269_pUBC-YFP-mod0	ku70	12	412	0.769231	TRUE	4:16436897	forward	4	16436897	RB	LZ31-1	0		0		0	Col-0	104269	pUBC-YFP-mod0	FALSE
LZ31-1-R_104269_pUBC-YFP-mod0	ku70	8	262	0.75	TRUE	4:16437214	reverse	4	16437214	RB	LZ31-1	19	ATTGTCGTTTCCCGCCTTC	0		-7	Col-0	104269	pUBC-YFP-mod0	FALSE
LZ31-1-R_104269_pUBC-YFP-mod0	ku70	46	387	0.897959	TRUE	4:16617449	reverse	4	16617449	RB	LZ31-1	31	TGCAGCTGGCACTGATACTTTTGATACAAAA	0		0	Col-0	104269	pUBC-YFP-mod0	FALSE
LZ31-1-R_104269_pUBC-YFP-mod0	ku70	3	153	1	TRUE	4:16879659	reverse	4	16879659	RB	LZ31-1	4	ACAA	0		-8	Col-0	104269	pUBC-YFP-mod0	FALSE
LZ31-1-R_104269_pUBC-YFP-mod0	ku70	3	261	1	TRUE	4:17398637	reverse	4	17398637	RB	LZ31-1	34	GGAAAGCAACATGTTCAAGGATGGTCGGTTTGCG	0		0	Col-0	104269	pUBC-YFP-mod0	FALSE
LZ31-1-R_104269_pUBC-YFP-mod0	ku70	11	218	1	TRUE	4:17640415	forward	4	17640415	RB	LZ31-1	18	ACTGATAGTTTGAATTAT	0		0	Col-0	104269	pUBC-YFP-mod0	FALSE
LZ31-1-R_104269_pUBC-YFP-mod0	ku70	3	324	1	TRUE	4:17797198	forward	4	17797198	RB	LZ31-1	0		3	TTT	-2	Col-0	104269	pUBC-YFP-mod0	FALSE
LZ31-1-R_104269_pUBC-YFP-mod0	ku70	5	222	1	TRUE	4:18053498	reverse	4	18053498	RB	LZ31-1	0		0		-10	Col-0	104269	pUBC-YFP-mod0	FALSE
LZ31-1-R_104269_pUBC-YFP-mod0	ku70	10	229	1	TRUE	4:17771244	forward	4	17771244	RB	LZ31-1	50	ACTTAAAAACGTCCGCAATGTGTTATTAAGTTGTCGTTTCCCGTCCATAA	0		2	Col-0	104269	pUBC-YFP-mod0	FALSE
LZ31-1-R_104269_pUBC-YFP-mod0	ku70	17	584	0.823529	TRUE	4:17510187	forward	4	17510187	RB	LZ31-1	35	GCTTAGACAACTTAATAATGGGTAGAGCTTTGAGA	0		1	Col-0	104269	pUBC-YFP-mod0	FALSE
[truncated: 28,465 more rows]
